# Supplementary material for: Catalytic enantioselective arylative cyclizations of alkynyl 1,3-diketones by 1,4-rhodium(i) migration
Source: Royal Society of Chemistry journal article supplement (doi:10.1039/c9sc06309a), 2020-01-01
Supplement: c9sc06309a1.pdf [file c9sc06309a1.pdf]

## Catalytic enantioselective arylation cyclizations of alkynyl 1,3-diketones by 1,4-rhodium(I) migration

Alistair Groves,<sup>a,b</sup> Jinwei Sun,<sup>a,b,c</sup> Hal R. I. Parke,<sup>a,b</sup> Michael Callingham,<sup>a,b</sup> Stephen P. Argent,<sup>b</sup>  
Laurence J. Taylor,<sup>b</sup> and Hon Wai Lam<sup>\*,a,b</sup>

<sup>a</sup> *The GlaxoSmithKline Carbon Neutral Laboratories for Sustainable Chemistry,  
University of Nottingham, Jubilee Campus, Triumph Road, Nottingham, NG7 2TU, United Kingdom*

and

<sup>b</sup> *School of Chemistry, University of Nottingham, University Park, Nottingham, NG7 2RD,  
United Kingdom*

and

<sup>c</sup> *Jiangsu Collaborative Innovation Center of Atmospheric Environment and Equipment  
Technology, Jiangsu Key Laboratory of Atmospheric Environment Monitoring and Pollution  
Control, School of Chemistry and Materials Science, Nanjing University of Information Science  
and Technology, Nanjing, Jiangsu 210044 (China)*

### Supplementary Information

|                                                                        |     |
|------------------------------------------------------------------------|-----|
| General Information.....                                               | 2   |
| Preparation of Substrates .....                                        | 3   |
| Enantioselective Arylation Cyclizations of Alkynyl 1,3-Diketones ..... | 15  |
| NMR Spectra of New Compounds .....                                     | 40  |
| HPLC Traces.....                                                       | 89  |
| References.....                                                        | 131 |

## General Information

All air-sensitive reactions were carried out under an inert atmosphere using oven-dried apparatus. THF and toluene were dried and purified by passage through activated alumina columns using a solvent purification system. All commercially available reagents were used as received unless otherwise stated. Arylboronic acids were used as received unless the sample contained >10% boroxine as determined by  $^1\text{H}$  NMR analysis. In this case, the boronic acid was stirred in a mixture of  $\text{Et}_2\text{O}$  and water for 30 min. The organic phase was separated, dried ( $\text{Na}_2\text{SO}_4$ ), filtered, and concentrated *in vacuo* to give the corresponding boronic acid which was used without further purification. Petroleum ether refers to Sigma-Aldrich product 24587 (petroleum ether boiling point 40–60 °C). Thin layer chromatography (TLC) was performed on Merck DF Alufoilien 60F254 0.2 mm precoated plates. Compounds were visualized by exposure to UV light or by dipping the plates into solutions of potassium permanganate or vanillin followed by gentle heating. FIAS-H column chromatography was carried out using silica gel (Fisher Scientific 60 Å particle size 35–70 micron or Fluorochem 60 Å particle size 40–63 micron). Automated column chromatography was conducted using PuriFlash instrument from Interchim. Melting points were recorded on a Gallenkamp melting point apparatus and are uncorrected. The solvent of recrystallization is reported in parentheses. Infrared (IR) spectra were recorded on a Bruker platinum alpha FTIR spectrometer on the neat compound using the attenuated total reflection technique. NMR spectra were acquired on Bruker Ascend 400 or Ascend 500 spectrometers.  $^1\text{H}$  and  $^{13}\text{C}$  NMR spectra were referenced to external tetramethylsilane *via* the residual protonated solvent ( $^1\text{H}$ ) or the solvent itself ( $^{13}\text{C}$ ).  $^{19}\text{F}$  NMR spectra were referenced through the solvent lock ( $^2\text{H}$ ) signal according to the IUPAC-recommended secondary referencing method following Bruker protocols. All chemical shifts are reported in parts per million (ppm). For  $\text{CDCl}_3$ , the shifts are referenced to 7.27 ppm for  $^1\text{H}$  NMR spectroscopy and 77.0 ppm for  $^{13}\text{C}$  NMR spectroscopy. Abbreviations used in the description of resonances are: s (singlet), d (doublet), t (triplet), q (quartet), quint (quintet), br (broad) and m (multiplet). Coupling constants ( $J$ ) are quoted to the nearest 0.1 Hz.  $^{13}\text{C}$  NMR assignments were made using the DEPT sequence with secondary pulses at 90° and 135°. High-resolution mass spectra were recorded using electrospray ionization (ESI). X-ray diffraction data were collected at 120 K on an Agilent SuperNova diffractometer using  $\text{CuK}\alpha$  radiation. Chiral HPLC analysis was performed on Agilent 1200 Infinity series instruments using  $4.6 \times 250$  mm columns.  $[\text{Rh}(\text{cod})\text{Cl}]_2$  was used as an achiral rhodium complex to obtain authentic racemic compounds.

## Preparation of Substrates

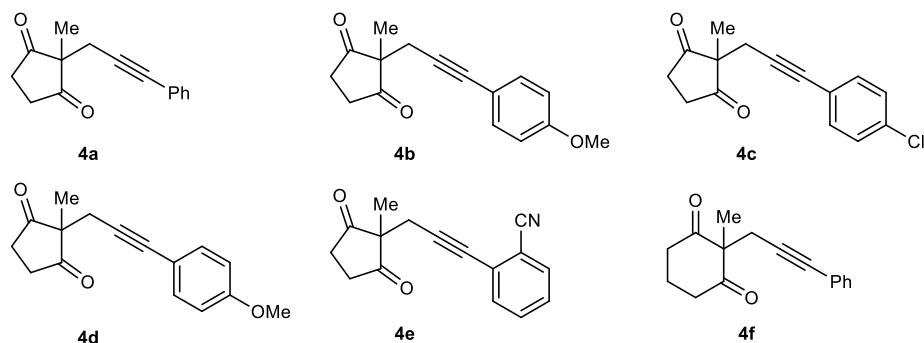

Substrates **4a–4f** were prepared as described previously.<sup>1</sup>

3-Methyl-3-(3-phenylprop-2-yn-1-yl)pentane-2,4-dione (**1a**)<sup>2</sup>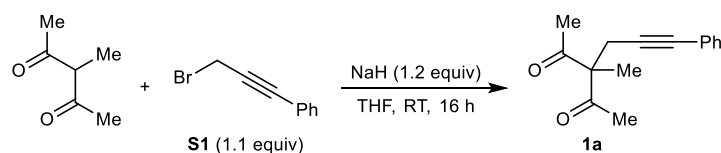

3-Methyl-2,4-pentanedione (1.75 mL, 15.0 mmol) was added dropwise to a solution of NaH (60% in mineral oil, 720 mg, 18.0 mmol) in THF (50 mL) at 0 °C under argon and the resulting mixture was stirred for 1 h. Alkynyl bromide **S1**<sup>3</sup> (80% wt. solution in toluene, 4.00 g, 16.5 mmol) was added dropwise and the solution was stirred at room temperature for 16 h, quenched with saturated aqueous NH<sub>4</sub>Cl solution (50 mL), and extracted into Et<sub>2</sub>O (3 × 50 mL). The combined organic layers were washed with brine (50 mL), dried (MgSO<sub>4</sub>), filtered, and concentrated *in vacuo*. Purification of the residue by column chromatography (100% petroleum ether to 5% EtOAc/petroleum ether) gave alkynyl 1,3-diketone **1a** as an orange oil (1.64 g, 48%) whose spectroscopic data were consistent with those reported previously.<sup>2</sup>

3-Ethyl-3-(3-phenylprop-2-yn-1-yl)pentane-2,4-dione (**1b**)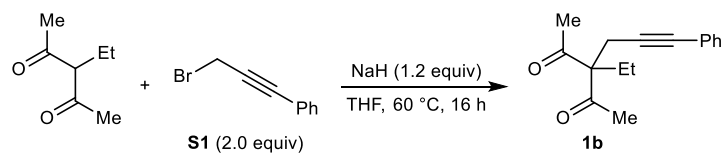

3-Ethylpentane-2,4-dione (4.03 mL, 3.00 mmol) was added dropwise to a solution of NaH (60% in mineral oil, 144 mg, 3.60 mmol) in THF (30 mL) at 0 °C under argon and the resulting mixture was stirred at room temperature for 1 h. Alkynyl bromide **S1**<sup>3</sup> (80% wt. solution in toluene, 1.46 g, 6.00 mmol) was added dropwise *via* syringe (using 2 mL of THF as a rinse) and the solution was stirred at 60 °C for 16 h. The reaction was cooled to room temperature, quenched with saturated aqueous NH<sub>4</sub>Cl solution (50 mL), and extracted into Et<sub>2</sub>O (3 × 50 mL). The combined organic layers were washed with brine (50 mL), dried (MgSO<sub>4</sub>), filtered, and concentrated *in vacuo*. Purification of the

residue by column chromatography (100% petroleum ether to 10% EtOAc/petroleum ether) gave *alkynyl 1,3-diketone 1b* as a yellow oil (580 mg, 82%).  $R_f = 0.35$  (10% EtOAc/pentane); IR (ATR) 2971, 1696 (C=O), 1491, 1356, 1157, 1107, 937, 755, 691  $\text{cm}^{-1}$ ;  $^1\text{H}$  NMR (400 MHz,  $\text{CDCl}_3$ )  $\delta$  7.36–7.32 (2H, m, ArH), 7.30–7.26 (3H, m, ArH), 2.98 (2H, s,  $\equiv\text{CCH}_2$ ), 2.22–2.16 (2H, m,  $\text{CH}_2\text{CH}_3$ ), 2.18 (6H, s,  $2 \times \text{CH}_3\text{C}=\text{O}$ ), 0.82 (3H, t,  $J = 7.6$  Hz,  $\text{CH}_2\text{CH}_3$ );  $^{13}\text{C}$  NMR (101 MHz,  $\text{CDCl}_3$ )  $\delta$  205.5 ( $2 \times \text{C}$ ), 131.6 ( $2 \times \text{CH}$ ), 128.2 ( $2 \times \text{CH}$ ), 128.1 (CH), 123.0 (C), 84.7 (C), 83.7 (C), 70.7 (C), 26.9 ( $2 \times \text{CH}_3$ ), 23.7 ( $\text{CH}_2$ ), 20.1 ( $\text{CH}_2$ ), 8.1 ( $\text{CH}_3$ ); HRMS (ESI) Exact mass calculated for  $[\text{C}_{16}\text{H}_{18}\text{NaO}_2]^+$   $[\text{M}+\text{Na}]^+$ : 265.1199, found 265.1199.

### 3-Butyl-3-(3-phenylprop-2-yn-1-yl)pentane-2,4-dione (**1c**)

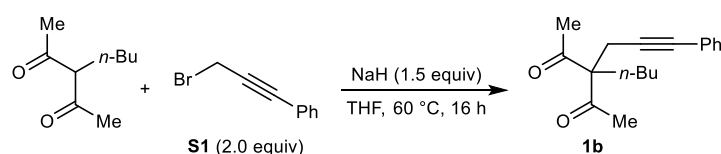

3-Butyl-2,4-pentanedione (506  $\mu\text{L}$ , 3.00 mmol) was added dropwise to a solution of NaH (60% in mineral oil, 180 mg, 4.50 mmol) in THF (30 mL) at 0 °C under argon and the resulting mixture was stirred at room temperature for 1 h. Alkynyl bromide **S1**<sup>3</sup> (80% wt. solution in toluene, 1.46 g, 6.00 mmol) was added dropwise *via* syringe (using 2 mL of THF as a rinse) and the solution was stirred at 60 °C for 16 h. The reaction was cooled to room temperature, quenched with  $\text{NH}_4\text{Cl}$  (50 mL), and extracted into  $\text{Et}_2\text{O}$  ( $3 \times 50$  mL). The combined organic layers were washed with brine (50 mL), dried ( $\text{MgSO}_4$ ), filtered, and concentrated *in vacuo*. Purification of residue by column chromatography (100% petroleum ether to 10% EtOAc/petroleum ether) gave *alkynyl 1,3-diketone 1c* as a yellow oil (713 mg, 88%).  $R_f = 0.35$  (10% EtOAc/pentane); IR (ATR) 2958, 2933, 2873, 1698 (C=O), 1356, 1185, 1158, 1116, 756, 691  $\text{cm}^{-1}$ ;  $^1\text{H}$  NMR (500 MHz,  $\text{CDCl}_3$ )  $\delta$  7.37–7.33 (2H, m, ArH), 7.30–7.26 (3H, m, ArH), 2.99 (2H, s,  $\equiv\text{CCH}_2$ ), 2.18 (6H, s,  $2 \times \text{CH}_3\text{C}=\text{O}$ ), 2.17–2.10 (2H, m,  $\text{CH}_2\text{CH}_2\text{CH}_2\text{CH}_3$ ), 1.39 (2H, sext,  $J = 7.4$  Hz,  $\text{CH}_2\text{CH}_2\text{CH}_3$ ), 1.12–1.06 (2H, m,  $\text{CH}_2\text{CH}_2\text{CH}_3$ ), 0.93 (3H, t,  $J = 7.4$  Hz,  $\text{CH}_2\text{CH}_3$ );  $^{13}\text{C}$  NMR (101 MHz,  $\text{CDCl}_3$ )  $\delta$  205.5 ( $2 \times \text{C}$ ), 131.6 ( $2 \times \text{CH}$ ), 128.2 ( $2 \times \text{CH}$ ), 128.0 (CH), 123.0 (C), 84.8 (C), 83.7 (C), 70.4 (C), 30.5 ( $\text{CH}_2$ ), 26.9 ( $2 \times \text{CH}_3$ ), 25.9 ( $\text{CH}_2$ ), 23.1 ( $\text{CH}_2$ ), 21.6 ( $\text{CH}_2$ ), 13.8 ( $\text{CH}_3$ ); HRMS (ESI) Exact mass calculated for  $\text{C}_{18}\text{H}_{22}\text{NaO}_2^+$   $[\text{M}+\text{Na}]^+$ : 293.1512, found: 293.1504.

## Synthesis of Substrate 1d

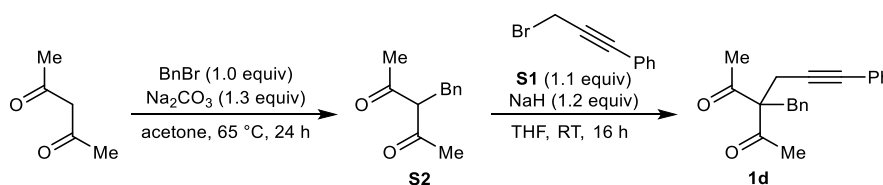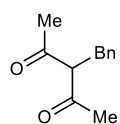

**3-Benzylpentane-2,4-dione (S2).**<sup>4</sup> Na<sub>2</sub>CO<sub>3</sub> (6.86 g, 65.0 mmol) was added portionwise over 15 min to a solution of pentane-2,4-dione (5.10 mL, 50.0 mmol) in acetone (25 mL) at 0 °C and the solution was stirred for 15 min. A solution of benzyl bromide (5.95 mL, 50.0 mmol) in acetone (25 mL) was added dropwise over 15 min and the solution was heated at reflux for 24 h. The reaction was cooled to room temperature, filtered, and the filtrate was concentrated *in vacuo*. Purification of the residue by column chromatography (10% Et<sub>2</sub>O/petroleum ether) gave diketone **S2** as a yellow oil (5.16 g, 54%, 24:76 ratio of keto:enol tautomers) whose spectroscopic data were consistent with those reported previously.<sup>4</sup>

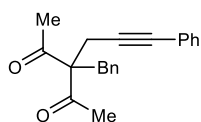

**3-Benzyl-3-(3-phenylprop-2-yn-1-yl)pentane-2,4-dione (1d).** 3-Benzylpentane-2,4-dione (**S2**, 1.90 g, 10.0 mmol) was added dropwise *via* syringe (using 2 mL of THF as a rinse) to a solution of NaH (60% in mineral oil, 480 mg, 12.0 mmol) in

THF (30 mL) at 0 °C under argon and the resulting mixture was stirred at room temperature for 1 h. Alkynyl bromide **S1**<sup>3</sup> (80% wt. solution in toluene, 2.67 g, 11.0 mmol) *via* syringe (using 2 mL of THF as a rinse) was added dropwise and the solution was stirred at room temperature for 16 h, quenched with saturated aqueous NH<sub>4</sub>Cl solution (50 mL), and extracted into Et<sub>2</sub>O (3 × 50 mL). The combined organic layers were washed with brine (50 mL), dried (MgSO<sub>4</sub>), filtered, and concentrated *in vacuo*. Purification of the residue by column chromatography (100% petroleum ether to 10% EtOAc/petroleum ether) gave *alkynyl 1,3-diketone 1d* as a yellow oil (1.16 g, 38%). *R<sub>f</sub>* = 0.19 (10% EtOAc/pentane); IR (ATR) 3069, 3029, 2956, 1695 (C=O), 1489, 1441, 1359, 1172, 1148, 755, 689 cm<sup>-1</sup>; <sup>1</sup>H NMR (500 MHz, CDCl<sub>3</sub>) δ 7.46–7.40 (2H, m, ArH), 7.36–7.26 (6H, m, ArH), 7.19–7.14 (2H, m, ArH), 3.47 (2H, s, PhCH<sub>2</sub>), 2.89 (2H, s, ≡CCH<sub>2</sub>), 2.27 (6H, s, 2 × CH<sub>3</sub>); <sup>13</sup>C NMR (101 MHz, CDCl<sub>3</sub>) δ 204.7 (2 × C), 135.6 (C), 131.6 (2 × CH), 129.7 (2 × CH), 128.5 (2 × CH), 128.3 (2 × CH), 128.2 (CH), 127.1 (CH), 122.9 (C), 84.8 (C), 84.7 (C), 71.3 (C), 36.9 (CH<sub>2</sub>), 27.4 (2 × CH<sub>3</sub>), 21.7 (CH<sub>2</sub>); HRMS (ESI) Exact mass calculated for C<sub>21</sub>H<sub>20</sub>NaO<sub>2</sub><sup>+</sup> [M+Na]<sup>+</sup>: 327.1356, found: 327.1355.

## Synthesis of Substrate 1e

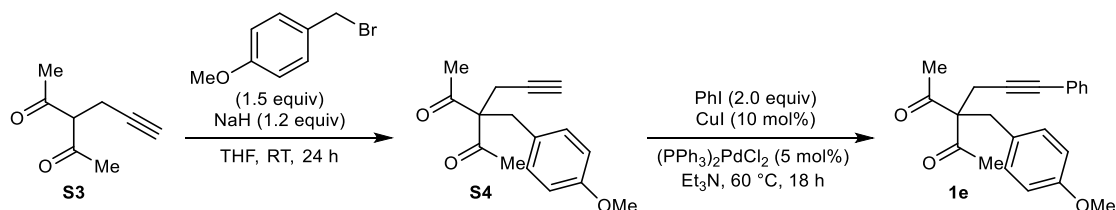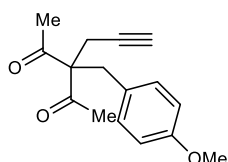

**3-(4-Methoxybenzyl)-3-(prop-2-yn-1-yl)pentane-2,4-dione (S4).** 3-(Prop-2-yn-1-yl)pentane-2,4-dione (S3,<sup>5</sup> 690 mg, 5.00 mmol) was added dropwise *via* syringe (using 2 mL of THF as a rinse) to a solution of NaH (60% in mineral oil, 240 mg, 6.00 mmol) in THF (30 mL) at 0 °C under argon and the resulting

mixture was stirred at room temperature for 1 h. 4-Methoxybenzyl bromide<sup>6</sup> (1.08 mL, 7.50 mmol) was added dropwise and the solution was stirred at room temperature for 24 h, quenched with saturated aqueous NH<sub>4</sub>Cl solution (50 mL), and extracted into Et<sub>2</sub>O (3 × 50 mL). The combined organic layers were washed with brine (50 mL), dried (MgSO<sub>4</sub>), filtered, and concentrated *in vacuo*. Purification of the residue by column chromatography (20% EtOAc/petroleum ether) gave *alkynyl 1,3-diketone* S4 as a yellow oil (771 mg, 60%). *R<sub>f</sub>* = 0.33 (20% EtOAc/pentane); IR (ATR) 2959, 1696 (C=O), 1513, 1360, 1266, 1171, 1151, 1027, 755, 690 cm<sup>-1</sup>; <sup>1</sup>H NMR (500 MHz, CDCl<sub>3</sub>) δ 7.03 (2H, d, *J* = 8.6 Hz, ArH), 6.80 (2H, d, *J* = 8.3 Hz, ArH), 3.78 (2H, s, OCH<sub>3</sub>), 3.34 (2H, s, ArCH<sub>2</sub>), 2.64 (2H, d, *J* = 2.7 Hz, ≡CCH<sub>2</sub>), 2.20 (6H, s, 2 × CH<sub>3</sub>C=O), 2.14 (1H, t, *J* = 2.7 Hz, C≡CH); <sup>13</sup>C NMR (101 MHz, CDCl<sub>3</sub>) δ 204.6 (2 × C), 158.7 (C), 130.6 (2 × CH), 127.3 (C), 113.9 (2 × CH), 79.7 (C), 72.6 (C), 71.1 (CH), 55.2 (CH<sub>3</sub>), 35.8 (CH<sub>2</sub>), 27.4 (2 × CH<sub>2</sub>), 20.7 (CH<sub>2</sub>); HRMS (ESI) Exact mass calculated for C<sub>16</sub>H<sub>18</sub>NaO<sub>3</sub><sup>+</sup> [M+Na]<sup>+</sup>: 281.1148, found: 281.1149.

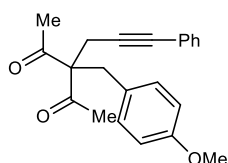

**3-(4-Methoxybenzyl)-3-(3-phenylprop-2-yn-1-yl)pentane-2,4-dione (1e).** A degassed solution of terminal alkyne S4 (516 mg, 2.00 mmol), iodobenzene (448 μL, 4.00 mmol), (PPh<sub>3</sub>)<sub>2</sub>PdCl<sub>2</sub> (70.2 mg, 0.10 mmol), and CuI (38.1 mg, 0.20

mmol) in Et<sub>3</sub>N (20 mL) was heated at 60 °C for 18 h. The reaction was cooled to room temperature, quenched with 1.0 M aqueous HCl solution (25 mL), and extracted into EtOAc (3 × 25 mL). The combined organic layers were washed with brine, dried (MgSO<sub>4</sub>), filtered, and concentrated *in vacuo*. Purification of the residue by automated column chromatography (5% EtOAc/petroleum ether to 10% EtOAc/petroleum ether) gave *alkynyl 1,3-diketone* 1e as a brown oil (525 mg, 79%). *R<sub>f</sub>* = 0.20 (20% EtOAc/pentane); IR (ATR) 2997, 2958, 2933, 1720 (C=O), 1512, 1356, 1246, 1176, 1032, 756, 691 cm<sup>-1</sup>; <sup>1</sup>H NMR (500 MHz, CDCl<sub>3</sub>) δ 7.46–7.37 (2H, m, ArH), 7.36–7.30 (3H, m, ArH), 7.07 (2H, d, *J* = 8.7 Hz, ArH), 6.81 (2H, d, *J* = 8.7 Hz, ArH), 3.78 (3H, s, OCH<sub>3</sub>), 3.40 (2H, s, ArCH<sub>2</sub>), 2.87 (2H,

s,  $\equiv\text{CCH}_2$ ), 2.24 (6H, s,  $2 \times \text{CH}_3\text{C}=\text{O}$ );  $^{13}\text{C}$  NMR (101 MHz,  $\text{CDCl}_3$ )  $\delta$  204.9 ( $2 \times \text{C}$ ), 158.7 (C), 131.6 ( $2 \times \text{CH}$ ), 130.7 ( $2 \times \text{CH}$ ), 128.3 ( $2 \times \text{CH}$ ), 128.2 (CH), 127.4 (C), 123.0 (C), 114.0 ( $2 \times \text{CH}$ ), 84.9 (C), 84.6 (C), 71.4 (C), 55.2 ( $\text{CH}_3$ ), 36.1 ( $\text{CH}_2$ ), 27.5 ( $2 \times \text{CH}_3$ ), 21.7 ( $\text{CH}_2$ ); HRMS (ESI) Exact mass calculated for  $\text{C}_{22}\text{H}_{22}\text{NaO}_3^+$   $[\text{M}+\text{Na}]^+$ : 357.1461, found: 357.1460.

### 3-Methyl-3-[3-(*p*-tolyl)prop-2-yn-1-yl]pentane-2,4-dione (**1f**)

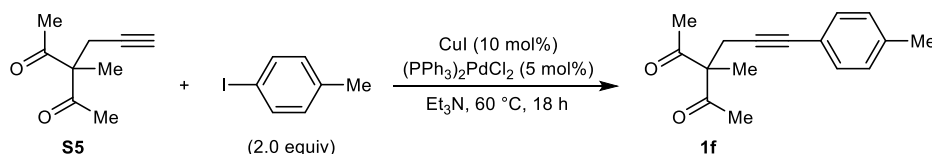

A degassed solution of terminal alkyne **S5**<sup>2</sup> (608 mg, 4.00 mmol), 4-iodotoluene (1.74 g, 8.00 mmol),  $(\text{PPh}_3)_2\text{PdCl}_2$  (140 mg, 0.20 mmol), and  $\text{CuI}$  (76.2 mg, 0.40 mmol) in  $\text{Et}_3\text{N}$  (40 mL) was heated at 60 °C for 18 h. The reaction was cooled to room temperature, quenched with 1.0 M aqueous  $\text{HCl}$  solution (50 mL), and extracted into  $\text{EtOAc}$  ( $3 \times 50$  mL). The combined organic layers were washed with brine, dried ( $\text{MgSO}_4$ ), filtered, and concentrated *in vacuo*. Purification of the residue by automated column chromatography (5%  $\text{EtOAc}$ /petroleum ether to 10%  $\text{EtOAc}$ /petroleum ether) gave *alkynyl 1,3-diketone 1f* as an orange oil (415 mg, 43%).  $R_f = 0.21$  (10%  $\text{EtOAc}$ /petroleum ether); IR (ATR) 3031, 2977, 2960, 2915, 1694 ( $\text{C}=\text{O}$ ), 1509, 1355, 1160, 1097, 814, 589, 526  $\text{cm}^{-1}$ ;  $^1\text{H}$  NMR (500 MHz,  $\text{CDCl}_3$ )  $\delta$  7.25 (2H, d,  $J = 8.2$  Hz, ArH), 7.09 (2H, d,  $J = 8.3$  Hz, ArH), 2.96 (2H, s,  $\equiv\text{CCH}_2$ ), 2.34 (3H, s, ArCH<sub>3</sub>), 2.20 (6H, s,  $2 \times \text{CH}_3\text{C}=\text{O}$ ), 1.54 (3H, s,  $\text{CH}_3\text{CC}=\text{O}$ );  $^{13}\text{C}$  NMR (101 MHz,  $\text{CDCl}_3$ )  $\delta$  205.6 ( $2 \times \text{C}$ ), 138.2 (C), 131.4 ( $2 \times \text{CH}$ ), 129.0 ( $2 \times \text{CH}$ ), 119.9 (C), 84.0 (C), 83.9 (C), 66.4 (C), 26.6 ( $2 \times \text{CH}_3$ ), 25.4 ( $\text{CH}_2$ ), 21.4 ( $\text{CH}_3$ ), 18.7 ( $\text{CH}_3$ ); HRMS (ESI) Exact mass calculated for  $\text{C}_{16}\text{H}_{18}\text{NaO}_2^+$   $[\text{M}+\text{Na}]^+$ : 265.1199, found: 265.1196.

### 3-[3-(4-Chlorophenyl)prop-2-yn-1-yl]-3-methylpentane-2,4-dione (**1g**)

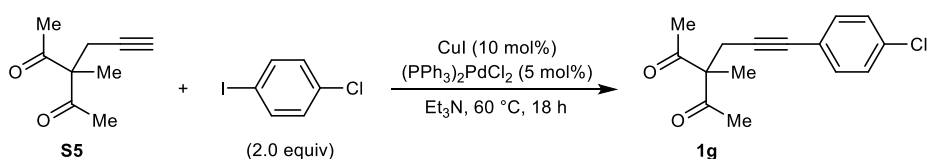

A degassed solution of terminal alkyne **S5**<sup>2</sup> (456 mg, 3.00 mmol), 4-chloro-1-iodobenzene (1.43 g, 6.00 mmol),  $(\text{PPh}_3)_2\text{PdCl}_2$  (105 mg, 0.15 mmol), and  $\text{CuI}$  (57.1 mg, 0.30 mmol) in  $\text{Et}_3\text{N}$  (30 mL) was heated at 60 °C for 18 h. The reaction was cooled to room temperature, quenched with 1.0 M aqueous  $\text{HCl}$  (50 mL) solution, and extracted into  $\text{EtOAc}$  ( $3 \times 50$  mL). The combined organic layers were washed with brine, dried ( $\text{MgSO}_4$ ), filtered, and concentrated *in vacuo*. Purification of the residue by automated column chromatography (5%  $\text{EtOAc}$ /petroleum ether to 10%  $\text{EtOAc}$ /petroleum ether) gave *alkynyl 1,3-diketone 1g* as a yellow oil (373 mg, 47%).  $R_f = 0.20$  (10%  $\text{EtOAc}$ /petroleum ether);

IR (ATR) 2980, 2937, 1698 (C=O), 1489, 1356, 1089, 827, 526  $\text{cm}^{-1}$ ;  $^1\text{H}$  NMR (500 MHz,  $\text{CDCl}_3$ )  $\delta$  7.32–7.25 (4H, m, ArH), 2.97 (2H, s,  $\equiv\text{CCH}_2$ ), 2.21 (6H, s,  $2 \times \text{CH}_3\text{C}=\text{O}$ ), 1.54 (3H, s,  $\text{CH}_3\text{CC}=\text{O}$ );  $^{13}\text{C}$  NMR (101 MHz,  $\text{CDCl}_3$ )  $\delta$  205.3 ( $2 \times \text{C}$ ), 134.1 (C), 132.8 ( $2 \times \text{CH}$ ), 128.5 ( $2 \times \text{CH}$ ), 121.4 (C), 85.9 (C), 82.7 (C), 66.3 (C), 26.5 ( $2 \times \text{CH}_3$ ), 25.3 ( $\text{CH}_2$ ), 18.6 ( $\text{CH}_3$ ); HRMS (ESI) Exact mass calculated for  $\text{C}_{15}\text{ClH}_{15}\text{NaO}_2^+$  [ $\text{M}+\text{Na}$ ] $^+$ : 285.0653, found: 285.0645.

### 3-[3-(4-Methoxyphenyl)prop-2-yn-1-yl]-3-methylpentane-2,4-dione (1h)

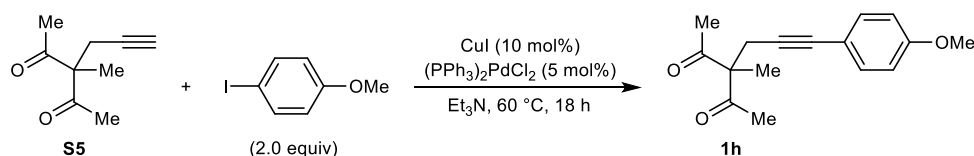

A degassed solution of terminal alkyne **S5**<sup>2</sup> (456 mg, 3.00 mmol), 4-iodoanisole (1.40 g, 6.00 mmol),  $(\text{PPh}_3)_2\text{PdCl}_2$  (105 mg, 0.15 mmol), and  $\text{CuI}$  (57.1 mg, 0.30 mmol) in  $\text{Et}_3\text{N}$  (30 mL) was heated at 60  $^\circ\text{C}$  for 18 h. The reaction was cooled to room temperature, quenched with 1.0 M aqueous  $\text{HCl}$  solution (50 mL), and extracted into  $\text{EtOAc}$  ( $3 \times 50$  mL). The combined organic layers were washed with brine, dried ( $\text{MgSO}_4$ ), filtered, and concentrated *in vacuo*. Purification of the residue by automated column chromatography (5%  $\text{EtOAc}$ /petroleum ether to 10%  $\text{EtOAc}$ /petroleum ether) gave *alkynyl 1,3-diketone* **1h** as a colorless oil (500 mg, 65%).  $R_f = 0.10$  (10%  $\text{EtOAc}$ /petroleum ether); IR (ATR) 3097, 3031, 2993, 2959, 1721 (C=O), 1693 (C=O), 1509, 1245, 1091, 839, 679  $\text{cm}^{-1}$ ;  $^1\text{H}$  NMR (500 MHz,  $\text{CDCl}_3$ )  $\delta$  7.29 (2H, d,  $J = 8.0$  Hz, ArH), 6.80 (2H, d,  $J = 8.0$  Hz, ArH), 3.80 (3H, s,  $\text{OCH}_3$ ), 2.94 (2H, s,  $\equiv\text{CCH}_2$ ), 2.20 (6H, s,  $2 \times \text{CH}_3\text{C}=\text{O}$ ), 1.53 (3H, s,  $\text{CH}_3\text{CC}=\text{O}$ );  $^{13}\text{C}$  NMR (101 MHz,  $\text{CDCl}_3$ )  $\delta$  205.7 ( $2 \times \text{C}$ ), 159.4 (C), 132.9 ( $2 \times \text{CH}$ ), 115.1 (C), 113.8 ( $2 \times \text{CH}$ ), 83.6 (C), 83.2 (C), 66.4 (C), 55.3 ( $\text{CH}_3$ ), 26.6 ( $2 \times \text{CH}_3$ ), 25.4 ( $\text{CH}_2$ ), 18.7 ( $\text{CH}_3$ ); HRMS (ESI) Exact mass calculated for  $\text{C}_{15}\text{ClH}_{15}\text{NaO}_3^+$  [ $\text{M}+\text{Na}$ ] $^+$ : 281.1148, found: 281.1148.

### 3-{3-[(1,1'-Biphenyl)-4-yl]prop-2-yn-1-yl}-3-methylpentane-2,4-dione (1i)

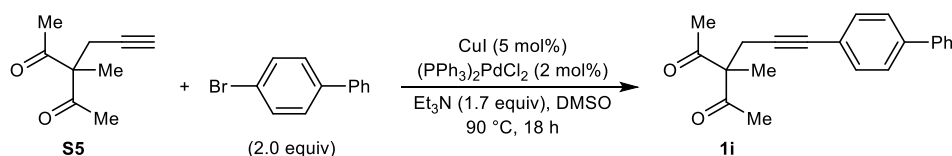

A degassed solution of terminal **S5**<sup>2</sup> (456 mg, 3.00 mmol), 4-bromo-1,1'-biphenyl (762 mg, 3.30 mmol),  $(\text{PPh}_3)_2\text{PdCl}_2$  (42.1 mg, 0.06 mmol),  $\text{CuI}$  (29 mg, 0.15 mmol), and  $\text{Et}_3\text{N}$  (0.71 mL, 5.1 mmol) in  $\text{DMSO}$  (10 mL) was heated at 90  $^\circ\text{C}$  for 18 h. The reaction was cooled to room temperature, quenched with 1.0 M aqueous  $\text{HCl}$  solution (50 mL), and extracted into  $\text{EtOAc}$  ( $3 \times 10$  mL). The combined organic layers were washed with brine, dried ( $\text{MgSO}_4$ ), filtered, and concentrated *in vacuo*. Purification of the residue by automated column chromatography (5%  $\text{EtOAc}$ /petroleum ether to 10%



EtOAc/petroleum ether) gave *alkynyl 1,3-diketone 1i* as a white solid (711 mg, 78%).  $R_f = 0.21$  (10% EtOAc/petroleum ether); m.p. (Et<sub>2</sub>O) 78–79 °C; IR (ATR) 1690 (C=O), 1485, 1358, 1213, 1159, 1097, 962, 839, 686 cm<sup>-1</sup>; <sup>1</sup>H NMR (400 MHz, CDCl<sub>3</sub>) δ 7.59–7.54 (2H, m, ArH), 7.54–7.48 (2H, m, ArH), 7.46–7.39 (4H, m, ArH), 7.38–7.32 (1H, m, ArH), 2.99 (2H, s, ≡CCH<sub>2</sub>), 2.21 (6H, s, 2 × CH<sub>3</sub>C=O), 1.56 (3H, s, CH<sub>3</sub>CC=O); <sup>13</sup>C NMR (101 MHz, CDCl<sub>3</sub>) δ 205.6 (2 × C), 140.9 (C), 140.3 (C), 132.0 (2 × CH), 128.8 (2 × CH), 127.6 (2 × CH), 127.0 (2 × CH), 126.9 (C), 121.9 (C), 110.0 (C), 85.5 (C), 83.7 (C), 66.4 (C), 26.6 (2 × CH<sub>3</sub>), 25.4 (CH<sub>2</sub>), 18.7 (CH<sub>3</sub>); HRMS (ESI) Exact mass calculated for [C<sub>21</sub>H<sub>20</sub>NaO<sub>2</sub>]<sup>+</sup> [M+Na]<sup>+</sup>: 327.1356, found 327.1347.

### 3-[3-(2-Fluorophenyl)prop-2-yn-1-yl]-3-methylpentane-2,4-dione (1j)

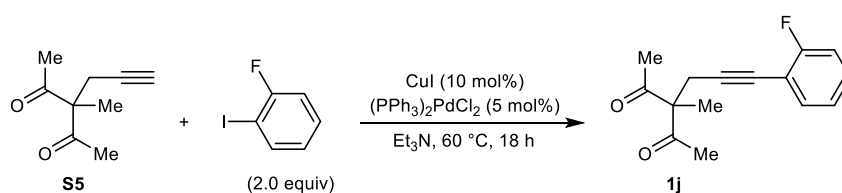

A degassed solution of terminal **S5**<sup>2</sup> (456 mg, 3.00 mmol), 1-fluoro-2-iodobenzene (700 μL, 6.00 mmol), (PPh<sub>3</sub>)<sub>2</sub>PdCl<sub>2</sub> (105 mg, 0.15 mmol), and CuI (57.1 mg, 0.30 mmol) in Et<sub>3</sub>N (30 mL) was heated at 60 °C for 18 h. The reaction was cooled to room temperature, quenched with 1.0 M aqueous HCl (50 mL) solution, and extracted into EtOAc (3 × 50 mL). The combined organic layers were washed with brine, dried (MgSO<sub>4</sub>), filtered, and concentrated *in vacuo*. Purification of the residue by automated column chromatography (5% EtOAc/petroleum ether to 10% EtOAc/petroleum ether) gave *alkynyl 1,3-diketone 1j* as a colorless oil (526 mg, 71%).  $R_f = 0.12$  (10% EtOAc/petroleum ether); IR (ATR) 2980, 2937, 1698 (C=O), 1492, 1357, 1215, 757, 694 cm<sup>-1</sup>; <sup>1</sup>H NMR (500 MHz, CDCl<sub>3</sub>) δ 7.38–7.32 (1H, m, ArH), 7.31–7.24 (1H, m, ArH), 7.11–7.00 (2H, m, ArH), 3.01 (2H, s, ≡CCH<sub>2</sub>), 2.22 (6H, s, 2 × CH<sub>3</sub>C=O), 1.57 (3H, s, CH<sub>3</sub>CC=O); <sup>13</sup>C NMR (101 MHz, CDCl<sub>3</sub>) δ 205.5 (2 × C), 162.9 (C,  $J_{CF} = 251$  Hz), 133.4 (CH), 129.8 (CH,  $J_{CF} = 7.5$  Hz), 123.8 (CH,  $J_{CF} = 3.7$  Hz), 115.4 (CH,  $J_{CF} = 20.7$  Hz), 111.5 (CH,  $J_{CF} = 16.0$  Hz), 90.4 (C), 77.2 (C), 66.2 (C), 26.6 (2 × C), 25.6 (CH<sub>2</sub>), 18.7 (CH<sub>3</sub>); <sup>19</sup>F NMR (376 MHz, CDCl<sub>3</sub>) δ -111.5; HRMS (ESI) Exact mass calculated for C<sub>15</sub>FH<sub>15</sub>NaO<sub>2</sub><sup>+</sup> [M+Na]<sup>+</sup>: 269.0948, found: 269.0947.

3-[3-(3,5-Dimethylphenyl)prop-2-yn-1-yl]-3-methylpentane-2,4-dione (**1k**)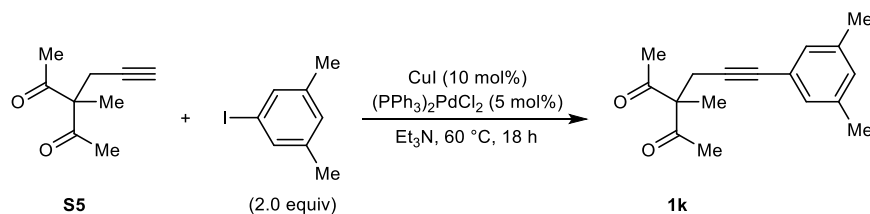

A degassed solution of terminal alkyne **S5**<sup>2</sup> (456 mg, 3.00 mmol), 1-iodo-3,5-dimethylbenzene (0.87 mL, 6.00 mmol), (PPh<sub>3</sub>)<sub>2</sub>PdCl<sub>2</sub> (105 mg, 0.15 mmol), and CuI (57.1 mg, 0.30 mmol) in Et<sub>3</sub>N (30 mL) was heated at 60 °C for 18 h. The reaction was cooled to room temperature, quenched with 1.0 M aqueous HCl solution (50 mL), and extracted into EtOAc (3 × 50 mL). The combined organic layers were washed with brine, dried (MgSO<sub>4</sub>), filtered, and concentrated *in vacuo*. Purification of the residue by automated column chromatography (5% EtOAc/petroleum ether to 10% EtOAc/petroleum ether) gave *alkynyl 1,3-diketone 1k* as a yellow oil (537 mg, 70%). *R*<sub>f</sub> = 0.21 (10% EtOAc/petroleum ether); IR (ATR) 3031, 2978, 2919, 2867, 1699 (C=O), 1598, 1355, 1162, 1092, 849, 690, cm<sup>-1</sup>; <sup>1</sup>H NMR (500 MHz, CDCl<sub>3</sub>) δ 6.99 (2H, s, ArH), 6.93 (1H, s, ArH), 2.95 (2H, s, ≡CCH<sub>2</sub>), 2.27 (6H, s, 2 × ArCH<sub>3</sub>), 2.21 (6H, s, 2 × CH<sub>3</sub>C=O), 1.54 (3H, s, CH<sub>3</sub>CC=O); <sup>13</sup>C NMR (101 MHz, CDCl<sub>3</sub>) δ 205.6 (2 × C), 137.8 (2 × C), 130.0 (CH), 129.2 (2 × CH), 122.6 (C), 84.1 (C), 84.0 (C), 66.4 (C), 26.6 (2 × CH<sub>3</sub>), 25.3 (CH<sub>2</sub>), 21.0 (2 × CH<sub>3</sub>), 18.7 (CH<sub>3</sub>); HRMS (ESI) Exact mass calculated for C<sub>17</sub>H<sub>20</sub>NaO<sub>2</sub><sup>+</sup> [M+Na]<sup>+</sup>: 279.1356, found: 279.1349.

3-[3-(Benzo[*d*][1,3]dioxol-5-yl)prop-2-yn-1-yl]-3-methylpentane-2,4-dione (**1l**)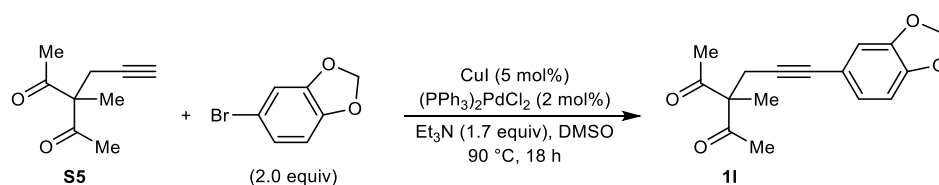

A degassed solution of terminal alkyne **S5**<sup>2</sup> (456 mg, 3.00 mmol), 5-bromobenzo[*d*][1,3]dioxole (660 mg, 3.30 mmol), (PPh<sub>3</sub>)<sub>2</sub>PdCl<sub>2</sub> (42.1 mg, 0.06 mmol), CuI (29 mg, 0.15 mmol), and Et<sub>3</sub>N (0.71 mL, 5.1 mmol) in DMSO (10 mL) was heated at 90 °C for 18 h. The reaction was cooled to room temperature, quenched with 1.0 M aqueous HCl solution (50 mL), and extracted into EtOAc (3 × 10 mL). The combined organic layers were washed with brine, dried (MgSO<sub>4</sub>), filtered, and concentrated *in vacuo*. Purification of the residue by automated column chromatography (5% EtOAc/petroleum ether to 10% EtOAc/petroleum ether) gave *alkynyl 1,3-diketone 1l* as a yellow solid (481 mg, 75%). *R*<sub>f</sub> = 0.21 (10% EtOAc/petroleum ether); m.p. (Et<sub>2</sub>O) 69–70 °C IR (ATR) 2918, 1697 (C=O), 1502, 1481, 1361, 1251, 1210, 1031, 929, 872, 814, 698 cm<sup>-1</sup>; <sup>1</sup>H NMR (400 MHz, CDCl<sub>3</sub>) δ 6.87 (1H, dd, *J* = 8.0, 1.6 Hz, ArH), 6.79 (1H, d, *J* = 1.5 Hz, ArH), 6.71 (1H, d, *J* = 8.0 Hz, ArH), 5.94 (2H, s, OCH<sub>2</sub>O), 2.93 (2H, s, ≡CCH<sub>2</sub>), 2.19 (6H, s, 2 × CH<sub>3</sub>C=O), 1.52 (3H, s, CH<sub>3</sub>CC=O); <sup>13</sup>C

NMR (101 MHz, CDCl<sub>3</sub>)  $\delta$  205.6 (2  $\times$  C), 147.7 (C), 147.3 (C), 126.1 (C), 116.2 (CH), 111.6 (CH), 108.3 (CH), 101.2 (OCH<sub>2</sub>), 83.6 (C), 83.1 (C), 66.4 (C), 26.6 (2  $\times$  CH<sub>3</sub>), 25.3 (CH<sub>2</sub>), 18.7 (CH<sub>3</sub>); HRMS (ESI) Exact mass calculated for [C<sub>16</sub>H<sub>17</sub>O<sub>4</sub>]<sup>+</sup> [M+H]<sup>+</sup>: 273.1121, found 273.1116.

### 3-Methyl-3-[3-(naphthalen-2-yl)prop-2-yn-1-yl]pentane-2,4-dione (1m)

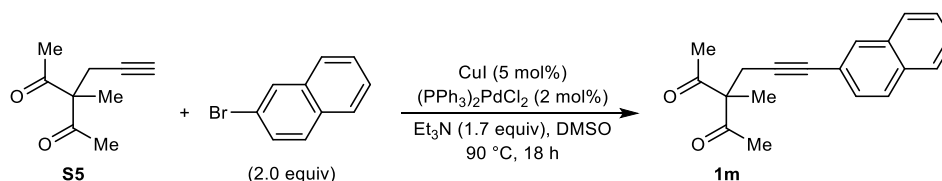

A degassed solution of terminal alkyne **S5**<sup>2</sup> (456 mg, 3.00 mmol), 2-bromonaphthalene (677 mg, 3.3 mmol), (PPh<sub>3</sub>)<sub>2</sub>PdCl<sub>2</sub> (42.1 mg, 0.06 mmol), CuI (29 mg, 0.15 mmol), and Et<sub>3</sub>N (0.71 mL, 5.1 mmol) in DMSO (10 mL) was heated at 90 °C for 18 h. The reaction was cooled to room temperature, quenched with 1.0 M aqueous HCl solution (50 mL), and extracted into EtOAc (3  $\times$  10 mL). The combined organic layers were washed with brine, dried (MgSO<sub>4</sub>), filtered, and concentrated *in vacuo*. Purification of the residue by automated column chromatography (5% EtOAc/petroleum ether to 10% EtOAc/petroleum ether) gave *alkynyl 1,3-diketone 1m* as a yellow solid (711 mg, 78%). *R*<sub>f</sub> = 0.21 (10% EtOAc/petroleum ether); m.p. (Et<sub>2</sub>O) 42–43 °C; IR (ATR) 1698 (C=O), 1356, 1210, 1163, 959, 858, 815, 750 cm<sup>-1</sup>; <sup>1</sup>H NMR (400 MHz, CDCl<sub>3</sub>)  $\delta$  7.87 (1H, s, ArH), 7.78–7.72 (2H, m, ArH), 7.50–7.45 (2H, m, ArH), 7.39 (1H, dd, *J* = 8.4, 1.4 Hz, ArH), 3.02 (2H, s,  $\equiv$ CCH<sub>2</sub>), 2.23 (6H, s, 2  $\times$  CH<sub>3</sub>C=O), 1.56 (3H, s, CH<sub>3</sub>CC=O); <sup>13</sup>C NMR (101 MHz, CDCl<sub>3</sub>)  $\delta$  205.6 (2  $\times$  C), 132.7 (C), 131.3 (C), 128.4 (CH), 127.9 (CH), 127.7 (CH), 127.6 (CH), 126.6 (CH), 126.5 (CH), 120.2 (CH), 110.0 (C), 85.2 (C), 84.2 (C), 66.4 (C), 26.6 (2  $\times$  CH<sub>3</sub>), 25.4 (CH<sub>2</sub>), 18.7 (CH<sub>3</sub>); HRMS (ESI) Exact mass calculated for [C<sub>19</sub>H<sub>18</sub>NaO<sub>2</sub>]<sup>+</sup> [M+Na]<sup>+</sup>: 301.1199, found 301.1194.

### 3-Methyl-3-[3-(naphthalen-1-yl)prop-2-yn-1-yl]pentane-2,4-dione (1n)

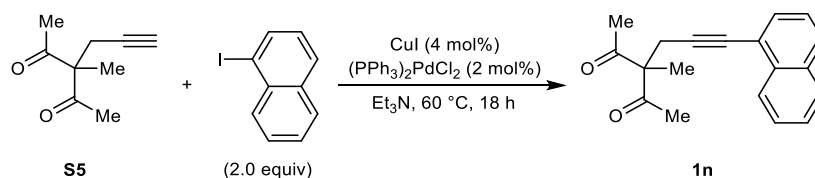

A degassed solution of terminal alkyne **S5**<sup>2</sup> (456 mg, 3.00 mmol), 1-iodonaphthalene (0.87 mL, 6.00 mmol), (PPh<sub>3</sub>)<sub>2</sub>PdCl<sub>2</sub> (42.6 mg, 0.06 mmol), and CuI (22.9 mg, 0.12 mmol) in Et<sub>3</sub>N (30 mL) was heated at 60 °C for 18 h. The reaction was cooled to room temperature, quenched with saturated aqueous NH<sub>4</sub>Cl solution (50 mL), and extracted into EtOAc (3  $\times$  50 mL). The combined organic layers were washed with brine, dried (MgSO<sub>4</sub>), filtered, and concentrated *in vacuo*. Purification of the residue by automated column chromatography (5% EtOAc/petroleum ether to 10% EtOAc/petroleum ether) gave *alkynyl 1,3-diketone 1n* as a brown oil (423 mg, 51%). *R*<sub>f</sub> = 0.19 (10%

EtOAc/petroleum ether); IR (ATR) 3058, 2978, 2932, 1698 (C=O), 1355, 910, 799, 773  $\text{cm}^{-1}$ ;  $^1\text{H}$  NMR (500 MHz,  $\text{CDCl}_3$ )  $\delta$  8.20 (1H, dd,  $J = 8.3, 1.1$  Hz, ArH), 7.97-7.72 (2H, m, ArH), 7.65-7.50 (3H, m, ArH), 7.40 (1H, dd,  $J = 8.3, 7.1$  Hz, ArH), 3.14 (2H, s,  $\equiv\text{CCH}_2$ ), 2.25 (6H, s,  $2 \times \text{ArCH}_3$ ), 1.64 (3H, s,  $\text{CH}_3\text{CC}=\text{O}$ );  $^{13}\text{C}$  NMR (101 MHz,  $\text{CDCl}_3$ )  $\delta$  205.5 ( $2 \times \text{C}$ ), 133.3 (C), 133.1 (C), 130.5 (CH), 128.5 (CH), 128.2 (CH), 126.8 (CH), 126.3 (CH), 125.9 (CH), 125.1 (CH), 120.6 (C), 89.7 (C), 81.9 (C), 66.5 (C), 26.6 ( $2 \times \text{CH}_3$ ), 25.7 ( $\text{CH}_2$ ), 18.8 ( $\text{CH}_3$ ); HRMS (ESI) Exact mass calculated for  $\text{C}_{19}\text{H}_{18}\text{NaO}_2^+$  [ $\text{M}+\text{Na}$ ] $^+$ : 301.1199, found: 301.1192.

### 3-Methyl-3-[3-(thiophen-2-yl)prop-2-yn-1-yl]pentane-2,4-dione (1o)

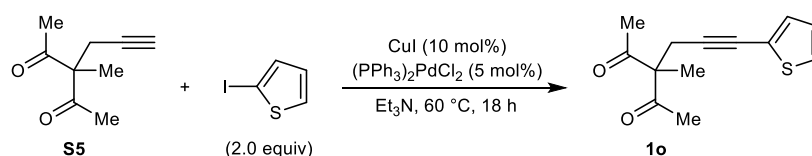

A degassed solution of terminal alkyne **S5**<sup>2</sup> (456 mg, 3.00 mmol), 2-iodothiophene (663  $\mu\text{L}$ , 6.00 mmol),  $(\text{PPh}_3)_2\text{PdCl}_2$  (105 mg, 0.15 mmol), and CuI (57.1 mg, 0.30 mmol) in  $\text{Et}_3\text{N}$  (30 mL) was heated at 60  $^\circ\text{C}$  for 18 h. The reaction was cooled to room temperature, quenched with 1.0 M aqueous HCl solution (50 mL), and extracted into EtOAc ( $3 \times 50$  mL). The combined organic layers were washed with brine, dried ( $\text{MgSO}_4$ ), filtered, and concentrated *in vacuo*. Purification of the residue by automated column chromatography (5% EtOAc/petroleum ether to 10% EtOAc/petroleum ether) gave *alkynyl 1,3-diketone* **1o** as a yellow oil (445 mg, 63%).  $R_f = 0.17$  (10% EtOAc/petroleum ether); IR (ATR) 2979, 2936, 1698 (C=O), 1304, 1163, 1091, 848, 701  $\text{cm}^{-1}$ ;  $^1\text{H}$  NMR (500 MHz,  $\text{CDCl}_3$ )  $\delta$  7.20 (1H, dd,  $J = 5.2, 1.2$  Hz, ArH), 7.12 (1H, dd,  $J = 3.6, 1.2$  Hz, ArH), 6.94 (1H, dd,  $J = 5.2, 3.6$  Hz, ArH), 2.99 (2H, s,  $\equiv\text{CCH}_2$ ), 2.20 (6H, s,  $2 \times \text{CH}_3\text{C}=\text{O}$ ), 1.54 (3H, s,  $\text{CH}_3\text{CC}=\text{O}$ );  $^{13}\text{C}$  NMR (101 MHz,  $\text{CDCl}_3$ )  $\delta$  205.4 ( $2 \times \text{C}$ ), 131.7 (CH), 126.8 (CH), 126.6 (CH), 122.9 (C), 88.9 (C), 77.0 (C), 66.2 (C), 26.6 ( $2 \times \text{CH}_3$ ), 25.6 ( $\text{CH}_2$ ), 18.7 ( $\text{CH}_3$ ); HRMS (ESI) Exact mass calculated for  $\text{C}_{13}\text{H}_{14}\text{NaO}_2\text{S}^+$  [ $\text{M}+\text{Na}$ ] $^+$ : 257.0607, found: 257.0599.

### 3-Methyl-3-[3-(pyridin-2-yl)prop-2-yn-1-yl]pentane-2,4-dione (1p)

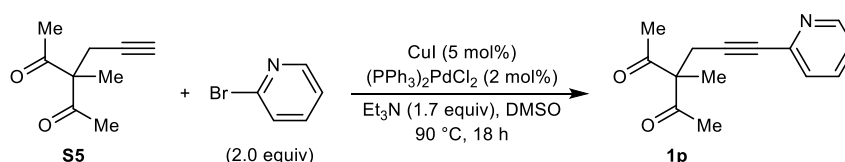

A degassed solution of terminal alkyne **S5**<sup>2</sup> (456 mg, 3.00 mmol), 2-bromopyridine (518 mg, 3.30 mmol),  $(\text{PPh}_3)_2\text{PdCl}_2$  (42.1 mg, 0.06 mmol), CuI (29 mg, 0.15 mmol), and  $\text{Et}_3\text{N}$  (0.71 mL, 5.1 mmol) in DMSO (10 mL) was heated at 90  $^\circ\text{C}$  for 18 h. The reaction was cooled to room temperature, quenched with 1.0 M aqueous HCl solution (50 mL), and extracted into EtOAc ( $3 \times 10$  mL). The

combined organic layers were washed with brine, dried (MgSO<sub>4</sub>), filtered, and concentrated *in vacuo*. Purification of the residue by automated column chromatography (5% EtOAc/petroleum ether to 10% EtOAc/petroleum ether) gave *alkynyl 1,3-diketone 1p* as a yellow oil (481 mg, 70%). *R<sub>f</sub>* = 0.21 (10% EtOAc/petroleum ether); IR (ATR) 2976, 1698 (C=O), 1582, 1464, 1428, 1357, 1165, 1092, 957, 778, 740 cm<sup>-1</sup>; <sup>1</sup>H NMR (400 MHz, CDCl<sub>3</sub>) δ 8.53 (1H, s, ArH), 7.61 (1H, tt, *J* = 7.8, 1.7 Hz, ArH), 7.34 (1H, t, *J* = 9.8 Hz, ArH), 7.23–7.17 (1H, m, ArH), 3.00 (2H, d, *J* = 2.2 Hz, ≡CCH<sub>2</sub>), 2.20 (6H, d, *J* = 2.0 Hz, 2 × CH<sub>3</sub>C=O), 1.56 (3H, d, *J* = 2.0 Hz, CH<sub>3</sub>CC=O); <sup>13</sup>C NMR (101 MHz, CDCl<sub>3</sub>) δ 205.3 (2 × C), 149.9 (CH), 143.0 (C), 136.1 (CH), 127.1 (CH), 122.8 (CH), 85.4 (C), 83.4 (C), 66.2 (C), 26.5 (2 × CH<sub>3</sub>), 25.2 (CH<sub>2</sub>), 18.7 (CH<sub>3</sub>); HRMS (ESI) Exact mass calculated for [C<sub>14</sub>H<sub>15</sub>NNaO<sub>2</sub>]<sup>+</sup> [M+Na]<sup>+</sup>: 252.0995, found 252.0990.

#### 4-Methyl-4-(3-phenylprop-2-yn-1-yl)heptane-3,5-dione (1q)

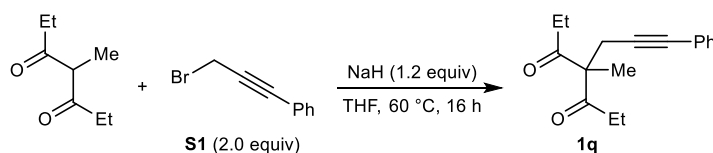

4-Methylheptane-3,5-dione (**S6**,<sup>7</sup> 710 mg, 5.00 mmol) was added dropwise *via* syringe (using 2 mL of THF as a rinse) to a solution of NaH (60% in mineral oil, 240 mg, 6.00 mmol) in THF (30 mL) at 0 °C under argon and the resulting mixture was stirred at room temperature for 1 h. Alkynyl bromide **S1**<sup>3</sup> (80% wt. solution in toluene, 2.44 g, 10.0 mmol) was added dropwise *via* syringe (using 2 mL of THF as a rinse) and the solution was stirred at 60 °C for 16 h. The reaction was cooled to room temperature, quenched with saturated aqueous NH<sub>4</sub>Cl solution (50 mL), and extracted into Et<sub>2</sub>O (3 × 50 mL). The combined organic layers were washed with brine (50 mL), dried (MgSO<sub>4</sub>), filtered, and concentrated *in vacuo*. Purification of the residue by column chromatography (100% petroleum ether to 10% EtOAc/petroleum ether) gave *alkynyl 1,3-diketone 1q* as a yellow oil (1.03 g, 78%). *R<sub>f</sub>* = 0.35 (10% EtOAc/pentane); IR (ATR) 2977, 1698 (C=O), 1490, 1347, 1202, 1088, 964, 755, 690 cm<sup>-1</sup>; <sup>1</sup>H NMR (400 MHz, CDCl<sub>3</sub>) δ 7.35–7.32 (2H, m, ArH), 7.29–7.26 (3H, m, ArH), 2.98 (2H, s, ≡CCH<sub>2</sub>), 2.52–2.45 (4H, m, 2 × CH<sub>2</sub>CH<sub>3</sub>), 1.54 (3H, s, CH<sub>3</sub>CC=O), 1.06 (6H, t, *J* = 7.2 Hz, 2 × CH<sub>2</sub>CH<sub>3</sub>); <sup>13</sup>C NMR (101 MHz, CDCl<sub>3</sub>) δ 208.4 (2 × C), 131.6 (CH), 128.2 (CH), 128.0 (CH), 123.1 (C), 85.2 (C), 83.7 (C), 65.7 (C), 32.1 (CH<sub>2</sub>), 25.5 (CH<sub>2</sub>), 22.4 (CH<sub>2</sub>), 18.8 (CH<sub>3</sub>), 8.0 (2 × CH<sub>3</sub>); HRMS (ESI) Exact mass calculated for [C<sub>17</sub>H<sub>20</sub>NaO<sub>2</sub>]<sup>+</sup> [M+Na]<sup>+</sup>: 279.1356, found 279.1356.

**2-Methyl-1,3-diphenyl-2-(3-phenylprop-2-yn-1-yl)propane-1,3-dione (1r)**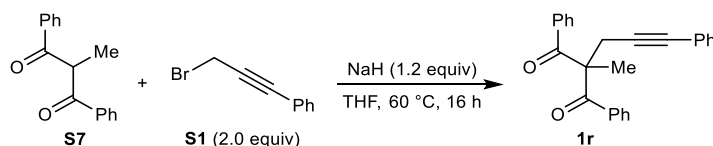

2-Methyl-1,3-diphenylpropane-1,3-dione (**S7**,<sup>8</sup> 1.19 g, 5.00 mmol) was added dropwise *via* syringe (using 2 mL of THF as a rinse) to a solution of NaH (60% in mineral oil, 240 mg, 6.00 mmol) in THF (30 mL) at 0 °C under argon and the resulting mixture was stirred at room temperature for 1 h. Alkynyl bromide **S1**<sup>3</sup> (80% wt. solution in toluene, 2.43 g, 10.0 mmol) was added dropwise *via* syringe (using 2 mL of THF as a rinse) and the solution was stirred at 60 °C for 16 h. The reaction was cooled to room temperature, quenched with saturated aqueous NH<sub>4</sub>Cl solution (50 mL), and extracted into Et<sub>2</sub>O (3 × 50 mL). The combined organic layers were washed with brine (50 mL), dried (MgSO<sub>4</sub>), filtered, and concentrated *in vacuo*. Purification of the residue by column chromatography (100% petroleum ether to 10% EtOAc/petroleum ether) gave *alkynyl 1,3-diketone* **1r** as a yellow solid (1.41 g, 80%) whose spectroscopic data were consistent with those reported previously.<sup>11</sup>

**6-Phenylhex-5-yn-2-one (6)**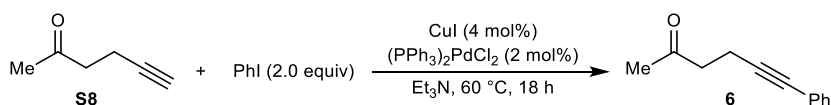

A degassed solution of hex-5-yn-2-one<sup>9</sup> (**S8**, 288 mg, 3.00 mmol), iodobenzene (669 μL, 6.00 mmol), (PPh<sub>3</sub>)<sub>2</sub>PdCl<sub>2</sub> (42.6 mg, 0.06 mmol), and CuI (22.9 mg, 0.12 mmol) in Et<sub>3</sub>N (30 mL) was heated at 60 °C for 18 h. The reaction was cooled to room temperature, quenched with saturated aqueous NH<sub>4</sub>Cl solution (25 mL), and extracted into EtOAc (3 × 25 mL). The combined organic layers were washed with brine, dried (MgSO<sub>4</sub>), filtered, and concentrated *in vacuo*. Purification of the residue by column chromatography (5% EtOAc/petroleum ether to 10% EtOAc/petroleum ether) gave *alkynyl ketone* **6** as a yellow oil (194 mg, 38%) whose spectroscopic data were consistent with those reported previously.<sup>10</sup>

## Enantioselective Arylative Cyclizations of Alkynyl 1,3-Diketones

## General Procedure A

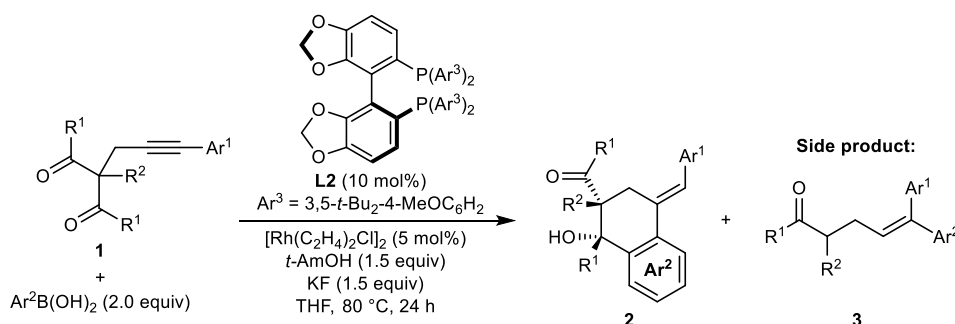

$[\text{Rh}(\text{C}_2\text{H}_4)_2\text{Cl}]_2$  (5.8 mg, 0.015 mmol) and (*S*)-DTBM-SEGPHOS (**L2**, 35.4 mg, 0.03 mmol) were added to an oven-dried microwave vial, which was sealed with a septum and purged with argon for 30 min. Degassed THF (5.5 mL) was added and the mixture was stirred at room temperature for 30 min under argon. In a separate oven-dried microwave vial the alkynyl 1,3-diketone **1** (0.30 mmol), boronic acid (0.60 mmol), and KF (26.1 mg, 0.45 mmol) were added. A septum was fitted and the vial was purged with argon for 30 min. The catalyst solution was added to the vial containing the alkynyl 1,3-diketone using additional THF (0.5 mL) as a rinse. *t*-Amyl alcohol (49  $\mu\text{L}$ , 0.45 mmol) was added and the mixture was stirred at 80 °C for 24 h. The reaction was cooled to room temperature, diluted with  $\text{H}_2\text{O}$  and saturated aqueous  $\text{NH}_4\text{Cl}$  solution and extracted with EtOAc. The combined organic layers were washed with brine, dried ( $\text{Na}_2\text{SO}_4$ ), filtered, and concentrated *in vacuo*. Purification of the residue by column chromatography gave the arylation product. In most cases, small quantities of minor products **3** were also observed in the  $^1\text{H}$  NMR spectra of the crude material, but with the exception of the reaction forming arylation product **2a** (*vide infra*), they were not isolated.

**1-((1*S*,2*R*)-4-[(*E*)-Benzylidene]-1-hydroxy-1,2-dimethyl-1,2,3,4-tetrahydronaphthalen-2-yl)ethanone (1a) and 3-methyl-6,6-diphenylhex-5-en-2-one (2a) and 3-methyl-6,6-diphenylhex-5-en-2-one (3a)**

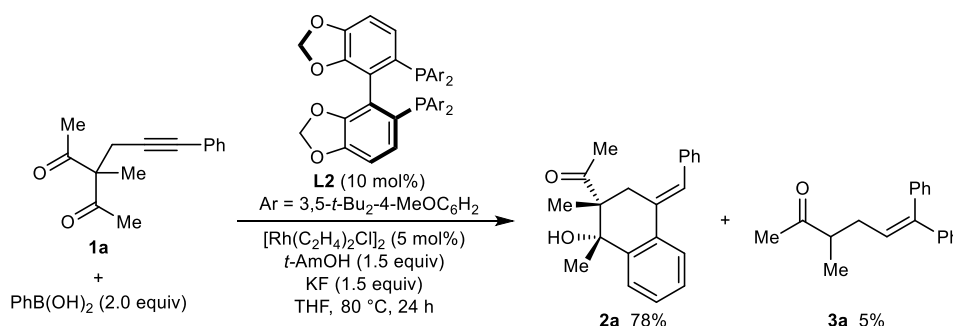

General Procedure A was followed using alkynyl 1,3-diketone **1a** (68.5 mg, 0.30 mmol) and phenylboronic acid (73.2 mg, 0.60 mmol). Purification by column chromatography (5% to 10% EtOAc/pentane) gave *ketone* **3a** as a colorless oil (4.3 mg, 5%) followed by *arylativ cyclization product* **2a** as a yellow solid (71.5 mg, 78%).

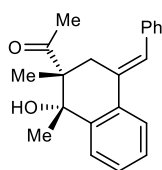

**1-((1*S*,2*R*)-4-[(*E*)-Benzylidene]-1-hydroxy-1,2-dimethyl-1,2,3,4-tetrahydronaphthalen-2-yl)ethanone (**2a**).**  $R_f = 0.12$  (10% EtOAc/pentane); m.p. 128–129 °C (MeOH);  $[\alpha]_D^{20.5} -244$  (*c* 1.00,  $\text{CHCl}_3$ ); IR (ATR) 3476 (OH), 1682

(C=O), 1454, 1376, 1353, 1076, 929, 960, 694, 580, 538  $\text{cm}^{-1}$ ;  $^1\text{H NMR}$  (500 MHz,  $\text{CDCl}_3$ )  $\delta$  7.80 (1H, dd,  $J = 7.8, 1.4$  Hz, ArH), 7.65 (1H, d,  $J = 7.9$  Hz, ArH), 7.44–7.41 (2H, m, ArH), 7.38–7.37 (2H, m, ArH), 7.35–7.29 (2H, m, ArH), 7.25–7.21 (1H, m, ArH), 7.17 (1H, d,  $J = 2.6$  Hz, C=CH), 4.87 (1H, d,  $J = 1.4$  Hz, OH), 3.41 (1H, dd,  $J = 16.5, 1.2$  Hz,  $\text{CH}_a\text{H}_b$ ), 2.94 (1H, dd,  $J = 16.5, 2.6$  Hz,  $\text{CH}_a\text{H}_b$ ), 1.89 (3H, s,  $\text{CH}_3\text{C=O}$ ), 1.41 (3H, d,  $J = 1.4$  Hz,  $\text{CH}_3\text{COH}$ ), 1.36 (3H, s,  $\text{CH}_3\text{CC=O}$ );  $^{13}\text{C NMR}$  (101 MHz  $\text{CDCl}_3$ )  $\delta$  217.5 (C), 145.9 (C), 137.3 (C), 132.9 (C), 132.9 (C), 129.3 (2  $\times$  CH), 128.6 (2  $\times$  CH), 128.5 (CH), 127.1 (CH), 127.0 (CH), 125.7 (CH), 125.3 (CH), 123.3 (CH), 75.0 (C), 54.7 (C), 36.9 ( $\text{CH}_2$ ), 26.8 ( $\text{CH}_3$ ), 26.1 ( $\text{CH}_3$ ), 18.8 ( $\text{CH}_3$ ); HRMS (ESI) Exact mass calculated for  $[\text{C}_{21}\text{H}_{22}\text{NaO}_2]^+$   $[\text{M}+\text{Na}]^+$ : 329.1512, found 329.1510; Enantiomeric excess was determined by HPLC with a Chiralpak AS-H column (80:20 isohexane:*i*-PrOH, 0.8 mL/min, 280 nm, 25 °C):  $t_r$  (minor) = 6.6 min,  $t_r$  (major) = 7.6 min, 98% ee.

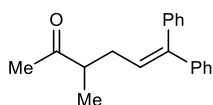

**3-Methyl-6,6-diphenylhex-5-en-2-one (**3a**).**  $R_f = 0.30$  (10% EtOAc/pentane); IR

(ATR) 2964, 2924, 2852, 1709 (C=O), 1494, 1359, 1074, 758, 698  $\text{cm}^{-1}$ ;  $^1\text{H NMR}$  (400 MHz,  $\text{CDCl}_3$ )  $\delta$  7.46–7.29 (4H, m, ArH), 7.26–7.15 (6H, m, ArH), 6.01 (1H, t,  $J = 7.4$  Hz,  $\text{CH}_2\text{CH=}$ ), 2.63 (1H, quin,  $J = 6.8$  Hz, O=CCH), 2.47 (1H, dt,  $J = 14.8, 6.8$  Hz,  $\text{CH}_a\text{H}_b\text{CH=}$ ), 2.23 (1H, dt,  $J = 14.8, 7.5$  Hz,  $\text{CH}_a\text{H}_b\text{CH=}$ ), 2.09 (3H, s,  $\text{CH}_3\text{C=O}$ ), 1.11 (3H, d,  $J = 7.0$  Hz,  $\text{CHCH}_3$ );  $\delta$



$^{13}\text{C}$  NMR (101 MHz,  $\text{CDCl}_3$ )  $\delta$  211.8 (C), 143.6 (C), 142.4 (C), 139.8 (C), 129.8 (2  $\times$  CH), 128.3 (2  $\times$  CH), 128.1 (2  $\times$  CH), 127.2 (2  $\times$  CH), 127.1 (2  $\times$  CH), 126.2 (CH), 47.6 (CH), 32.7 ( $\text{CH}_2$ ), 28.1 ( $\text{CH}_3$ ), 15.9 ( $\text{CH}_3$ ); HRMS (ESI) Exact mass calcd for  $\text{C}_{19}\text{H}_{20}\text{NaO}^+$   $[\text{M}+\text{Na}]^+$ : 287.1406, found: 287.1395.

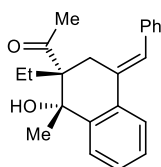

**1-[(1S,2R,E)-4-Benzylidene-2-ethyl-1-hydroxy-1-methyl-1,2,3,4-tetrahydronaphthalen-2-yl]ethanone (2b).** The title compound was prepared

according to General Procedure A using alkynyl 1,3-diketone **1b** (72.6 mg, 0.30 mmol) and phenylboronic acid (73.2 mg, 0.60 mmol), and purified by column

chromatography (5% to 10% EtOAc/*n*-pentane) to give a yellow solid (64.2 mg, 67%).  $R_f$  = 0.10 (10% EtOAc/pentane); m.p. ( $\text{Et}_2\text{O}$ ) 96–97 °C;  $[\alpha]_{\text{D}}^{20.5}$  –60 (*c* 1.00,  $\text{CHCl}_3$ ); IR (ATR) 3437 (OH), 1687 (C=O), 1493, 1354, 1220, 1110, 911, 789, 757  $\text{cm}^{-1}$ ;  $^1\text{H}$  NMR (400 MHz,  $\text{CDCl}_3$ )  $\delta$  7.75 (1H, dd,  $J$  = 7.8, 1.3 Hz, ArH), 7.63 (1H, dd,  $J$  = 7.9, 1.2 Hz, ArH), 7.43–7.40 (4H, m, ArH), 7.34–7.29 (2H, m, ArH), 7.25–7.21 (1H, m, ArH), 7.12 (1H, s, C=CH), 4.84 (1H, d,  $J$  = 1.2 Hz, OH), 3.50 (1H, dd,  $J$  = 17.0, 1.4 Hz,  $\text{CH}_a\text{H}_b\text{C}=\text{O}$ ), 2.85 (1H, dd,  $J$  = 17.0, 2.6 Hz,  $\text{CH}_a\text{H}_b\text{C}=\text{O}$ ), 2.28–2.18 (1H, m,  $\text{CH}_a\text{H}_b\text{CH}_3$ ), 1.88 (3H, s,  $\text{CH}_3\text{C}=\text{O}$ ), 1.72–1.62 (1H, 2H, m,  $\text{CH}_a\text{H}_b\text{CH}_3$ ), 1.39 (3H, d,  $J$  = 1.2 Hz,  $\text{CH}_3\text{COH}$ ), 1.00 (3H, t,  $J$  = 7.7 Hz,  $\text{CH}_2\text{CH}_3$ );  $^{13}\text{C}$  NMR (101 MHz  $\text{CDCl}_3$ )  $\delta$  218.6 (C), 145.9 (C), 137.3 (C), 133.6 (C), 133.1 (C), 129.3 (2  $\times$  CH), 128.5 (2  $\times$  CH), 127.2 (CH), 127.1 (CH), 126.0 (CH), 124.9 (CH), 123.4 (CH), 75.8 (C), 57.5 (C), 35.4 ( $\text{CH}_2$ ), 28.9 ( $\text{CH}_3$ ), 28.0 ( $\text{CH}_3$ ), 26.1 ( $\text{CH}_2$ ), 10.1 ( $\text{CH}_3$ ); HRMS (ESI) Exact mass calculated for  $[\text{C}_{22}\text{H}_{24}\text{NaO}_2]^+$   $[\text{M}+\text{Na}]^+$ : 343.1669, found 343.1666; Enantiomeric excess was determined by HPLC with a Chiralpak AD-H column (90:10 isohexane:*i*-PrOH, 1.0 mL/min, 280 nm, 25 °C):  $t_r$  (minor) = 5.8 min,  $t_r$  (major) = 6.5 min; 96% ee.

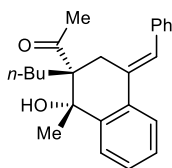

**1-[(1S,2R)-4-[(E)-Benzylidene]-2-butyl-1-hydroxy-1-methyl-1,2,3,4-tetrahydronaphthalen-2-yl]ethan-1-one (2c).** The title compound was prepared

according to General Procedure A using alkynyl 1,3-diketone **1c** (81.0 mg, 0.30 mmol) and phenylboronic acid (73.2 mg, 0.60 mmol), and purified by column

chromatography (10% EtOAc/pentane) to give a yellow oil (28.2 mg, 27%).  $R_f$  = 0.17 (10% EtOAc/pentane);  $[\alpha]_{\text{D}}^{20.1}$  –64.0 (*c* 1.00,  $\text{CHCl}_3$ ); IR (ATR) 3443 (OH), 2956, 2929, 2870, 1684 (C=O), 1354, 1038, 758, 697  $\text{cm}^{-1}$ ;  $^1\text{H}$  NMR (400 MHz,  $\text{CDCl}_3$ )  $\delta$  7.75 (1H, dd,  $J$  = 7.8, 1.5 Hz, ArH), 7.62 (1H, dd,  $J$  = 8.0, 1.3 Hz, ArH), 7.47–7.38 (4H, m, ArH), 7.36–7.28 (2H, m, ArH), 7.29–7.19 (1H, m, ArH), 7.12 (1H, t,  $J$  = 1.9 Hz, C=CH), 4.81 (1H, d,  $J$  = 1.3 Hz, OH), 3.49 (1H, dd,  $J$  = 17.0, 1.5 Hz,  $\text{CH}_a\text{H}_b\text{C}=\text{O}$ ), 2.87 (1H, dd,  $J$  = 17.0, 2.6 Hz,  $\text{CH}_a\text{H}_b\text{C}=\text{O}$ ), 2.16 (1H, td,  $J$  = 13.5, 4.3 Hz,  $\text{CH}_a\text{H}_b\text{CH}_2\text{CH}_2\text{CH}_3$ ), 1.87 (3H, s,  $\text{CH}_3\text{C}=\text{O}$ ), 1.61–1.57 (1H, m,  $\text{CH}_a\text{H}_b\text{CH}_2\text{CH}_2\text{CH}_3$ ), 1.50–1.21 (7H, m,  $\text{CH}_3\text{COH}$  and  $\text{CH}_2\text{CH}_2\text{CH}_3$ ), 0.91 (3H, t,  $J$  = 7.1 Hz,  $\text{CH}_2\text{CH}_3$ );  $^{13}\text{C}$  NMR (101 MHz,  $\text{CDCl}_3$ )  $\delta$

218.5 (C), 145.9 (C), 137.4 (C), 133.6 (C), 133.2 (C), 129.3 (2 × CH), 128.54 (2 × CH), 128.53 (CH), 127.2 (CH), 127.1 (CH), 126.0 (CH), 125.0 (CH), 123.4 (CH), 75.7 (C), 57.4 (C), 35.8 (CH<sub>2</sub>), 35.3 (CH<sub>2</sub>), 28.7 (CH<sub>3</sub>), 27.6 (CH<sub>2</sub>), 26.2 (CH<sub>3</sub>), 23.7 (CH<sub>2</sub>), 13.9 (CH<sub>3</sub>); HRMS (ESI) Exact mass calculated for C<sub>24</sub>H<sub>28</sub>NaO<sub>2</sub><sup>+</sup> [M+Na]<sup>+</sup>: 371.1982, found: 371.1973; Enantiomeric excess was determined by HPLC with a Chiralpak AS-H column (80:20 isohexane:*i*-PrOH, 1.0 mL/min, 280 nm, 23 °C): t<sub>r</sub> (minor) = 4.2 min, t<sub>r</sub> (major) = 5.8 min, 95% ee.

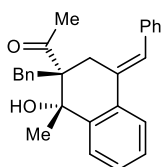

**1-((1S,2R)-2-Benzyl-4-[(E)-benzylidene]-1-hydroxy-1-methyl-1,2,3,4-**

**tetrahydronaphthalen-2-yl]ethanone (2d).** The title compound was prepared according to General Procedure A using alkynyl 1,3-diketone **1d** (91.2 mg, 0.30 mmol) and phenylboronic acid (73.2 mg, 0.60 mmol), and purified by column chromatography (5% to 10% EtOAc/pentane) to give a yellow solid (57.6 mg, 50%). R<sub>f</sub> = 0.13 (10% EtOAc/pentane); m.p. 144–145 °C (Et<sub>2</sub>O); [α]<sub>D</sub><sup>20.5</sup> +96.0 (c 1.00, CHCl<sub>3</sub>); IR (ATR) 3502 (OH), 1681 (C=O), 1492, 1362, 1229, 1069, 937, 867, 796, 699 cm<sup>-1</sup>; <sup>1</sup>H NMR (400 MHz, CDCl<sub>3</sub>) δ 7.76 (1H, dd, *J* = 7.7, 1.1 Hz, ArH), 7.63 (1H, d, *J* = 7.8 Hz, ArH), 7.48–7.41 (4H, m, ArH), 7.36–7.21 (6H, m, ArH), 7.16 (2H, d, *J* = 7.1 Hz, ArH), 7.09 (1H, s, C=CH), 5.29 (1H, d, *J* = 1.2 Hz, OH), 3.65 (1H, d, *J* = 13.1 Hz, PhCH<sub>a</sub>H<sub>b</sub>), 3.51 (1H, d, *J* = 18.2 Hz, CH<sub>a</sub>H<sub>b</sub>C=), 3.05 (1H, dd, *J* = 18.2, 2.5 Hz, CH<sub>a</sub>H<sub>b</sub>C=), 2.88 (1H, d, *J* = 13.1 Hz, PhCH<sub>a</sub>H<sub>b</sub>), 1.44 (3H, s, CH<sub>3</sub>), 1.37 (3H, s, CH<sub>3</sub>); <sup>13</sup>C NMR (101 MHz CDCl<sub>3</sub>) δ 220.8 (C), 145.3 (C), 137.3 (C), 136.6 (C), 134.3 (C), 132.7 (2 × CH), 130.1 (2 × CH), 129.3 (2 × CH), 128.48 (2 × CH), 128.46 (CH), 127.4 (CH), 127.2 (CH), 126.9 (CH), 126.6 (CH), 124.3 (CH), 123.6 (CH), 75.6 (C), 57.2 (C), 40.4 (CH<sub>2</sub>), 35.0 (CH<sub>2</sub>), 31.4 (CH<sub>3</sub>), 25.1 (CH<sub>3</sub>); HRMS (ESI) Exact mass calculated for [C<sub>27</sub>H<sub>26</sub>NaO<sub>2</sub>]<sup>+</sup> [M+Na]<sup>+</sup>: 405.1825, found 405.1821; Enantiomeric excess was determined by HPLC with a Chiralpak AS-H column (80:20 isohexane:*i*-PrOH, 0.8 mL/min, 280 nm, 25 °C): t<sub>r</sub> (major) = 5.7 min, t<sub>r</sub> (minor) = 7.2 min, 98% ee.

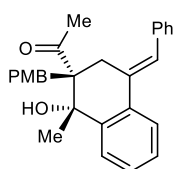

**1-((1S,2R)-4-[(E)-Benzylidene]-1-hydroxy-2-(4-methoxybenzyl)-1-methyl-**

**1,2,3,4-tetrahydronaphthalen-2-yl]ethan-1-one (2e).** The title compound was prepared according to General Procedure A using alkynyl 1,3-diketone **1e** (100 mg, 0.30 mmol) and phenylboronic acid (73.2 mg, 0.60 mmol), and purified by column chromatography (10% EtOAc/pentane) to give a yellow oil (65.6 mg, 53%). R<sub>f</sub> = 0.15 (10% EtOAc/pentane); [α]<sub>D</sub><sup>20.3</sup> +184 (c 1.00, CHCl<sub>3</sub>); IR 3433 (OH), 2956, 2934, 1678 (C=O), 1511, 1353, 1246, 1032, 759, 693 (ATR) cm<sup>-1</sup>; <sup>1</sup>H NMR (400 MHz, CDCl<sub>3</sub>) δ 7.76 (1H, dd, *J* = 7.9, 1.4 Hz, ArH), 7.64 (1H, dd, *J* = 7.9, 1.2 Hz, ArH), 7.48–7.40 (4H, m, ArH), 7.40–7.22 (3H, m, ArH), 7.12–7.04 (3H, m, ArH and C=CH), 6.84 (2H, d, *J* = 8.6 Hz, ArH), 5.30 (1H, m, OH), 3.80 (3H, s, OCH<sub>3</sub>), 3.61 (1H, d, *J* = 13.3 Hz, ArCH<sub>a</sub>H<sub>b</sub>), 3.54 (1H, dd, *J* = 18.2, 2.1 Hz, CH<sub>a</sub>H<sub>b</sub>C=), 3.04 (1H, dd, *J* = 18.2,

2.6 Hz, CH<sub>a</sub>H<sub>b</sub>C=), 2.84 (1H, d, *J* = 13.3 Hz, ArCH<sub>a</sub>H<sub>b</sub>), 1.43 (3H, d, *J* = 1.4 Hz, CH<sub>3</sub>COH), 1.41 (3H, s, CH<sub>3</sub>C=O); <sup>13</sup>C NMR (101 MHz, CDCl<sub>3</sub>) δ 221.0 (C), 158.5 (C), 145.4 (C), 137.3 (C), 134.3 (C), 132.8 (C), 131.0 (2 × CH), 129.3 (2 × CH), 128.5 (2 × CH), 128.4 (CH), 128.3 (C), 127.4 (CH), 127.1 (CH), 126.5 (CH), 124.3 (CH), 123.6 (CH), 113.8 (2 × CH), 75.6 (C), 57.2 (C), 55.2 (CH<sub>3</sub>), 39.5 (CH<sub>2</sub>), 35.0 (CH<sub>2</sub>), 31.5 (CH<sub>3</sub>), 25.1 (CH<sub>3</sub>); HRMS (ESI) Exact mass calculated for C<sub>28</sub>H<sub>28</sub>NaO<sub>3</sub><sup>+</sup> [M+Na]<sup>+</sup>: 435.1931, found: 435.1927; Enantiomeric excess was determined by HPLC with a Chiralpak AS-H column (80:20 isohexane:*i*-PrOH, 0.8 mL/min, 280 nm, 23 °C): *t*<sub>r</sub> (major) = 6.7 min, *t*<sub>r</sub> (minor) = 8.2 min, 98% ee.

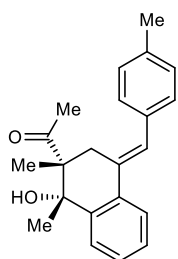

**1-((1S,2R)-1-Hydroxy-1,2-dimethyl-4-[(*E*)-4-methylbenzylidene]-1,2,3,4-tetrahydronaphthalen-2-yl)ethan-1-one (2f).** The title compound was prepared according to General Procedure A using alkynyl 1,3-diketone **1f** (72.6 mg, 0.30 mmol) and phenylboronic acid (73.2 mg, 0.60 mmol), and purified by column chromatography (10% EtOAc/pentane) to give a yellow solid (78.9 mg, 82%). *R*<sub>f</sub> =

0.12 (10% EtOAc/pentane); m.p. 89–91 °C (Et<sub>2</sub>O); [α]<sub>D</sub><sup>20.4</sup> –216 (c 1.00, CHCl<sub>3</sub>); IR (ATR) 3442 (OH), 3002, 2918, 2871, 1683 (C=O), 1510, 1354, 1072, 817, 699 cm<sup>-1</sup>; <sup>1</sup>H NMR (400 MHz, CDCl<sub>3</sub>) δ 7.81 (1H, dd, *J* = 7.8, 1.5 Hz, ArH), 7.65 (1H, dd, *J* = 8.1, 1.3 Hz, ArH), 7.35–7.31 (1H, m, ArH), 7.30–7.27 (3H, m, ArH), 7.27–7.22 (3H, ArH), 7.15 (1H, br s, C=CH), 4.89 (1H, d, *J* = 1.3 Hz, OH), 3.43 (1H, dd, *J* = 16.6, 1.2 Hz, CH<sub>a</sub>H<sub>b</sub>), 2.94 (1H, dd, *J* = 16.6, 2.6 Hz, CH<sub>a</sub>H<sub>b</sub>), 2.42 (3H, s, ArCH<sub>3</sub>), 1.91 (3H, s, CH<sub>3</sub>C=O), 1.42 (3H, d, *J* = 1.3 Hz, CH<sub>3</sub>COH), 1.38 (3H, s, CH<sub>3</sub>CC=O); <sup>13</sup>C NMR (101 MHz, CDCl<sub>3</sub>) δ 217.6 (C), 145.8 (C), 137.0 (C), 134.4 (C), 133.1 (C), 132.2 (C), 129.24 (2 × CH), 129.22 (2 × CH), 128.4 (CH), 127.0 (CH), 125.8 (CH), 125.3 (CH), 123.2 (CH), 75.1 (C), 54.7 (C), 37.0 (CH<sub>2</sub>), 26.7 (CH<sub>3</sub>), 26.1 (CH<sub>3</sub>), 21.3 (CH<sub>3</sub>), 18.9 (CH<sub>3</sub>); HRMS (ESI) Exact mass calculated for C<sub>22</sub>H<sub>24</sub>NaO<sub>2</sub><sup>+</sup> [M+Na]<sup>+</sup>: 343.1669, found: 343.1668; Enantiomeric excess was determined by HPLC with a Chiralpak AS-H column (80:20 isohexane:*i*-PrOH, 1.0 mL/min, 280 nm, 23 °C): *t*<sub>r</sub> (minor) = 4.9 min, *t*<sub>r</sub> (major) = 5.9 min, 97% ee.

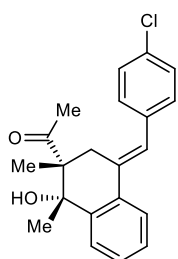

**1-((1S,2R)-4-[(*E*)-4-Chlorobenzylidene]-1-hydroxy-1,2-dimethyl-1,2,3,4-tetrahydronaphthalen-2-yl)ethan-1-one (2g).** The title compound was prepared according to General Procedure A using alkynyl 1,3-diketone **1g** (81.0 mg, 0.30 mmol) and phenylboronic acid (73.2 mg, 0.60 mmol), and purified by column chromatography (10% EtOAc/pentane) to give a yellow solid (77.4 mg, 76%). *R*<sub>f</sub> =

0.13 (10% EtOAc/pentane); m.p. 144–146 °C (Et<sub>2</sub>O); [α]<sub>D</sub><sup>20.1</sup> –228 (c 1.00, CHCl<sub>3</sub>); IR (ATR) 3448 (OH), 2971, 2936, 1681 (C=O), 1562, 1354, 1073, 825, 691 cm<sup>-1</sup>; <sup>1</sup>H NMR (400 MHz, CDCl<sub>3</sub>) δ 7.80 (1H, dd, *J* = 8.0, 1.4 Hz, ArH), 7.63 (1H, dd, *J* = 8.0, 1.2 Hz, ArH), 7.41–7.37 (2H, m, ArH), 7.36–

7.28 (3H, m, ArH), 7.23 (1H, ddd,  $J = 8.6, 7.3, 1.4$  Hz, ArH), 7.10 (1H, app d,  $J = 1.8$  Hz, C=CH), 4.84 (1H, d,  $J = 1.3$  Hz, OH), 3.34 (1H, dd,  $J = 16.5, 1.1$  Hz, CH<sub>a</sub>H<sub>b</sub>), 2.91 (1H, dd,  $J = 16.5, 2.7$  Hz, CH<sub>a</sub>H<sub>b</sub>), 1.89 (3H, s, CH<sub>3</sub>C=O), 1.41 (3H, d,  $J = 1.4$  Hz, CH<sub>3</sub>COH), 1.37 (3H, s, CH<sub>3</sub>CC=O); <sup>13</sup>C NMR (101 MHz, CDCl<sub>3</sub>) δ 217.2 (C), 146.0 (C), 135.7 (C), 133.6 (C), 132.9 (C), 132.6 (C), 130.5 (2 × CH), 128.9 (CH), 128.7 (2 × CH), 127.1 (CH), 125.4 (CH), 124.4 (CH), 123.3 (CH), 75.0 (C), 54.8 (C), 36.9 (CH<sub>2</sub>), 26.8 (CH<sub>3</sub>), 26.0 (CH<sub>3</sub>), 18.9 (CH<sub>3</sub>); HRMS (ESI) Exact mass calculated for C<sub>21</sub>ClH<sub>21</sub>NaO<sub>2</sub><sup>+</sup> [M+Na]<sup>+</sup>: 363.1122, found: 363.1114; Enantiomeric excess was determined by HPLC with a Chiralpak AS-H column (80:20 isohexane:*i*-PrOH, 1.0 mL/min, 280 nm, 23 °C): t<sub>r</sub> (minor) = 5.3 min, t<sub>r</sub> (major) = 7.3 min, 97% ee.

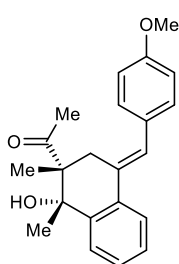

**1-((1S,2R)-1-Hydroxy-4-[(E)-4-methoxybenzylidene]-1,2-dimethyl-1,2,3,4-tetrahydronaphthalen-2-yl)ethan-1-one (2h).** The title compound was prepared according to General Procedure A using alkynyl 1,3-diketone **1h** (77.4 mg, 0.30 mmol) and phenylboronic acid (73.2 mg, 0.60 mmol), and purified by column chromatography (10% EtOAc/pentane) to give a yellow oil (48.7 mg, 48%). R<sub>f</sub> =

0.15 (10% EtOAc/pentane); [α]<sub>D</sub><sup>20.2</sup> -204 (*c* 1.00, CHCl<sub>3</sub>); IR (ATR) 3454 (OH), 2971, 2934, 1686 (C=O), 1604, 1509, 1175, 1073, 826, 701 cm<sup>-1</sup>; <sup>1</sup>H NMR (400 MHz, CDCl<sub>3</sub>) δ 7.79 (1H, dd,  $J = 7.8, 1.4$  Hz, ArH), 7.62 (1H, dd,  $J = 8.0, 1.3$  Hz, ArH), 7.36–7.28 (3H, m, ArH), 7.24–7.19 (1H, m, ArH), 7.10 (1H, app d,  $J = 2.5$  Hz, C=CH), 6.99–6.93 (2H, m, ArH), 4.88 (1H, d,  $J = 1.4$  Hz, OH), 3.87 (3H, s, OCH<sub>3</sub>), 3.41 (1H, dd,  $J = 16.5, 1.1$  Hz, CH<sub>a</sub>H<sub>b</sub>), 2.92 (1H, dd,  $J = 16.5, 2.6$  Hz, CH<sub>a</sub>H<sub>b</sub>), 1.90 (3H, s, CH<sub>3</sub>C=O), 1.41 (3H, d,  $J = 1.3$  Hz, CH<sub>3</sub>COH), 1.37 (3H, s, CH<sub>3</sub>CC=O); <sup>13</sup>C NMR (101 MHz, CDCl<sub>3</sub>) δ 217.6 (C), 158.6 (C), 145.6 (C), 133.2 (C), 131.3 (C), 130.6 (2 × CH), 129.9 (C), 128.3 (CH), 127.0 (CH), 125.4 (CH), 125.2 (CH), 123.1 (CH), 113.9 (2 × CH), 75.1 (C), 55.3 (CH<sub>3</sub>), 54.6 (C), 37.0 (CH<sub>2</sub>), 26.7 (CH<sub>3</sub>), 26.1 (CH<sub>3</sub>), 18.9 (CH<sub>3</sub>); HRMS (ESI) Exact mass calculated for C<sub>22</sub>H<sub>24</sub>NaO<sub>3</sub><sup>+</sup> [M+Na]<sup>+</sup>: 359.1618, found: 359.1617; Enantiomeric excess was determined by HPLC with a Chiralpak AS-H column (80:20 isohexane:*i*-PrOH, 1.0 mL/min, 280 nm, 23 °C): t<sub>r</sub> (minor) = 6.3 min, t<sub>r</sub> (major) = 8.3 min, 88% ee.

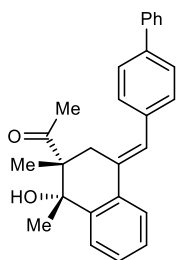

**1-((1S,2R,E)-4-[(1,1'-Biphenyl)-4-ylmethylene]-1-hydroxy-1,2-dimethyl-1,2,3,4-tetrahydronaphthalen-2-yl)ethanone (2i).** The title compound was prepared according to General Procedure A using alkynyl 1,3-diketone **1i** (91.2 mg, 0.30 mmol) and phenylboronic acid (73.2 mg, 0.60 mmol), and purified by column chromatography (5% to 10% EtOAc/pentane) to give a yellow solid (73.8 mg, 64%).

R<sub>f</sub> = 0.14 (10% EtOAc/pentane); m.p. (Et<sub>2</sub>O) 151–152 °C; IR (ATR) 3463 (OH), 1686 (C=O), 1454, 1356, 1227, 1073, 930, 835, 765, 695 cm<sup>-1</sup>; [α]<sub>D</sub><sup>20.6</sup> -228 (*c* 1.00, CHCl<sub>3</sub>); <sup>1</sup>H NMR (400 MHz, CDCl<sub>3</sub>)

$\delta$  7.81 (1H, dd,  $J = 7.8, 1.2$  Hz, ArH), 7.70–7.60 (5H, m, ArH), 7.49–7.45 (4H, m, ArH), 7.42–7.30 (2H, m, ArH), 7.26–7.21 (1H, m, ArH), 7.19 (1H, app d,  $J = 1.6$  Hz, C=CH), 4.89 (1H, s, OH), 3.48 (1H, dd,  $J = 16.6, 0.9$  Hz, CH<sub>a</sub>H<sub>b</sub>), 2.99 (1H, dd,  $J = 16.6, 2.6$  Hz, CH<sub>a</sub>H<sub>b</sub>), 1.93 (3H, s, CH<sub>3</sub>C=O), 1.42 (3H, s, CH<sub>3</sub>), 1.39 (3H, s, CH<sub>3</sub>); <sup>13</sup>C NMR (101 MHz CDCl<sub>3</sub>)  $\delta$  217.6 (C), 145.9 (C), 140.4 (C), 139.8 (C), 136.3 (C), 133.04 (C), 132.98 (C), 129.8 (CH), 128.9 (2  $\times$  CH), 128.6 (2  $\times$  CH), 127.5 (2  $\times$  CH), 127.12 (2  $\times$  CH), 127.05 (CH), 126.9 (CH), 125.4 (CH), 125.3 (CH), 123.3 (CH), 75.1 (C), 54.7 (C), 37.1 (CH<sub>2</sub>), 26.7 (CH<sub>3</sub>), 26.2 (CH<sub>3</sub>), 18.9 (CH<sub>3</sub>); HRMS (ESI) Exact mass calculated for [C<sub>27</sub>H<sub>26</sub>NaO<sub>2</sub>]<sup>+</sup> [M+Na]<sup>+</sup>: 405.1825, found 405.1822; Enantiomeric excess was determined by HPLC with Chiralpak AS-H column (80:20 isohexane:*i*-PrOH, 0.8 mL/min, 280 nm, 25 °C):  $t_r$  (minor) = 6.4 min,  $t_r$  (major) = 8.3 min; 85% ee.

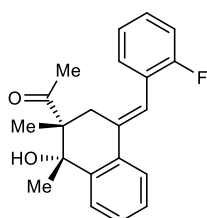

**1-((1S,2R)-4-((E)-2-Fluorobenzylidene)-1-hydroxy-1,2-dimethyl-1,2,3,4-tetrahydronaphthalen-2-yl)ethan-1-one (2j).** The title compound was prepared according to General Procedure A using alkynyl 1,3-diketone **1j** (73.8 mg, 0.30 mmol) and phenylboronic acid (73.2 mg, 0.60 mmol), and purified by column chromatography (10% EtOAc/pentane) to give a yellow solid (83.8 mg, 86%).  $R_f$

= 0.15 (10% EtOAc/pentane); m.p. 126–128 °C (Et<sub>2</sub>O); [ $\alpha$ ]<sub>D</sub><sup>20.3</sup> –232 (*c* 1.00, CHCl<sub>3</sub>); IR (ATR) 3472 (OH), 2993, 2971, 2875, 1685 (C=O), 1485, 1352, 1229, 763, 694 cm<sup>-1</sup>; <sup>1</sup>H NMR (400 MHz, CDCl<sub>3</sub>)  $\delta$  7.81 (1H, dd,  $J = 7.9, 1.4$  Hz, ArH), 7.67 (1H, dd,  $J = 8.0, 1.2$  Hz, ArH), 7.39–7.28 (3H, m, ArH), 7.26–7.13 (3H, m, ArH), 7.12 (1H, app d,  $J = 1.8$  Hz, C=CH), 4.90 (1H, d,  $J = 1.5$  Hz, OH), 3.18 (1H, dd,  $J = 16.6, 1.1$  Hz, CH<sub>a</sub>H<sub>b</sub>), 2.88 (1H, dd,  $J = 16.6, 2.7$  Hz, CH<sub>a</sub>H<sub>b</sub>), 1.92 (3H, s, CH<sub>3</sub>C=O), 1.42 (3H, d,  $J = 1.0$  Hz, CH<sub>3</sub>COH), 1.35 (3H, s, CH<sub>3</sub>CC=O); <sup>13</sup>C NMR (101 MHz, CDCl<sub>3</sub>)  $\delta$  217.4 (C), 160.2 (C,  $J_{CF} = 247.9$  Hz), 146.1 (C), 135.1 (C), 132.3 (C), 130.7 (CH), 129.1 (CH,  $J_{CF} = 8.3$  Hz), 128.9 (CH), 127.0 (CH), 125.5 (CH), 125.0 (C,  $J_{CF} = 14.6$  Hz), 124.0 (CH,  $J_{CF} = 3.6$  Hz), 123.5 (CH), 118.2 (CH), 115.8 (CH,  $J_{CF} = 22.0$  Hz), 75.1 (C), 54.8 (C), 36.8 (CH<sub>2</sub>), 26.9 (CH<sub>3</sub>), 25.8 (CH<sub>3</sub>), 18.7 (CH<sub>3</sub>); <sup>19</sup>F NMR (376 MHz, CDCl<sub>3</sub>)  $\delta$  –114.1; HRMS (ESI) Exact mass calculated for C<sub>21</sub>H<sub>21</sub>FN<sub>2</sub>O<sub>2</sub><sup>+</sup> [M+Na]<sup>+</sup>: 347.1418, found: 347.1413; Enantiomeric excess was determined by HPLC with a Chiralpak AS-H column (80:20 isohexane:*i*-PrOH, 1.0 mL/min, 280 nm, 25 °C):  $t_r$  (minor) = 5.3 min,  $t_r$  (major) = 6.2 min; 97% ee.

Slow diffusion of pentane into a solution of **2j** in CH<sub>2</sub>Cl<sub>2</sub> gave crystals that were suitable for X-ray crystallography:

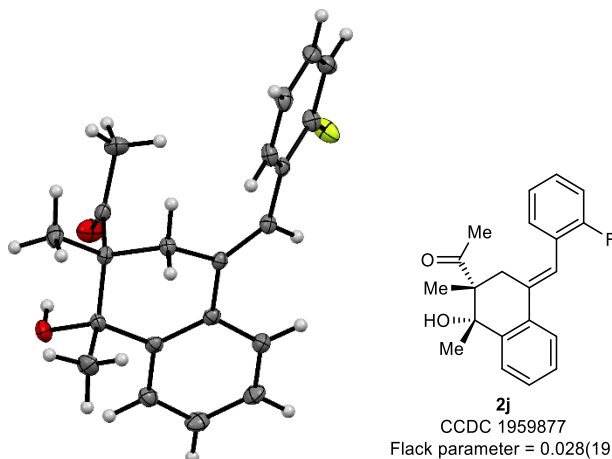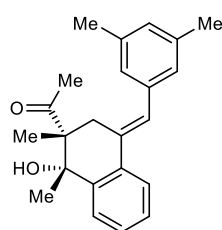

**1-[(1S,2R)-4-[(E)-3,5-Dimethylbenzylidene]-1-hydroxy-1,2-dimethyl-1,2,3,4-tetrahydronaphthalen-2-yl}ethan-1-one (2k).** The title compound was prepared according to General Procedure A using alkynyl 1,3-diketone **1k** (76.8 mg, 0.30 mmol) and phenylboronic acid (73.2 mg, 0.60 mmol), and purified by column chromatography (10% EtOAc/pentane) to give a yellow oil (75.2 mg, 75%).  $R_f =$

0.14 (10% EtOAc/pentane);  $[\alpha]_D^{20.4} -196$  ( $c$  1.00,  $\text{CHCl}_3$ ); IR (ATR) 3461 (OH), 2977, 2918, 2865, 1687 (C=O), 1596, 1353, 1073, 841, 683  $\text{cm}^{-1}$ ;  $^1\text{H NMR}$  (400 MHz,  $\text{CDCl}_3$ )  $\delta$  7.80 (1H, dd,  $J = 7.8, 1.4$  Hz, ArH), 7.63 (1H, dd,  $J = 8.0, 1.2$  Hz, ArH), 7.32 (1H, td,  $J = 7.5, 1.3$  Hz, ArH), 7.22 (1H, ddd,  $J = 8.5, 7.3, 1.5$  Hz, ArH), 7.11 (1H, app d,  $J = 2.5$  Hz, C=CH), 6.98 (2H, s, ArH), 6.95 (1H, s, ArH), 4.89 (1H, d,  $J = 1.3$  Hz, OH), 3.41 (1H, dd,  $J = 16.5, 1.1$  Hz,  $\text{CH}_a\text{H}_b$ ), 2.93 (1H, dd,  $J = 16.5, 2.6$  Hz,  $\text{CH}_a\text{H}_b$ ), 2.38 (6H, s,  $2 \times \text{ArCH}_3$ ), 1.92 (3H, s,  $\text{CH}_3\text{C=O}$ ), 1.42 (3H, d,  $J = 1.3$  Hz,  $\text{CH}_3\text{COH}$ ), 1.37 (3H, s,  $\text{CH}_3\text{CC=O}$ );  $^{13}\text{C NMR}$  (101 MHz,  $\text{CDCl}_3$ )  $\delta$  217.7 (C), 145.8 (C), 137.9 ( $2 \times \text{C}$ ), 137.2 (C), 133.1 (C), 132.4 (C), 128.9 (CH), 128.4 (CH), 127.1 ( $2 \times \text{CH}$ ), 127.0 (CH), 126.0 (CH), 125.3 (CH), 123.2 (CH), 75.1 (C), 54.7 (C), 36.9 ( $\text{CH}_2$ ), 26.7 ( $\text{CH}_3$ ), 26.2 ( $\text{CH}_3$ ), 21.4 ( $\text{CH}_3$ ), 18.9 ( $\text{CH}_3$ ); HRMS (ESI) Exact mass calculated for  $\text{C}_{23}\text{H}_{26}\text{NaO}_2^+$   $[\text{M}+\text{Na}]^+$ : 357.1825, found: 357.1821; Enantiomeric excess was determined by HPLC with a Chiralpak AS-H column (80:20 isohexane:*i*-PrOH, 1.0 mL/min, 280 nm, 23 °C):  $t_r$  (minor) = 4.2 min,  $t_r$  (major) = 4.7 min, 99% ee.

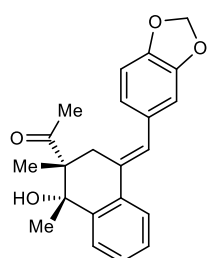

**1-[(1S,2R,E)-4-(Benzo[d][1,3]dioxol-5-ylmethylene)-1-hydroxy-1,2-dimethyl-1,2,3,4-tetrahydronaphthalen-2-yl}ethanone (2l).** The title compound was prepared according to General Procedure A using alkynyl 1,3-diketone **1l** (81.6 mg, 0.30 mmol) and phenylboronic acid (73.2 mg, 0.60 mmol), and purified by column chromatography (5% to 10% EtOAc/pentane) to give a yellow oil (61.0 mg, 58%).

$R_f = 0.10$  (10% EtOAc/pentane);  $[\alpha]_D^{20.3} -220$  ( $c$  1.00,  $\text{CHCl}_3$ ); IR (ATR) 3455 (OH), 1687 (C=O), 1488, 1354, 1249, 1246, 1102, 1036, 922, 783, 730  $\text{cm}^{-1}$ ;  $^1\text{H NMR}$  (400 MHz,  $\text{CDCl}_3$ )  $\delta$  7.78 (1H,

dd,  $J = 7.8, 1.3$  Hz, ArH), 7.59 (1H, d,  $J = 7.4$  Hz, ArH), 7.34–7.27 (1H, m, ArH), 7.24–7.16 (1H, m, ArH), 7.05 (1H, app d,  $J = 1.7$  Hz, C=CH), 6.88–6.82 (3H, m, ArH), 6.05–5.98 (2H, m, OCH<sub>2</sub>O), 4.86 (1H, d,  $J = 1.1$  Hz, OH), 3.39 (1H, d,  $J = 16.4$  Hz, CCH<sub>a</sub>H<sub>b</sub>), 2.89 (1H, dd,  $J = 16.4, 2.5$  Hz, CCH<sub>a</sub>H<sub>b</sub>), 1.91 (3H, s, CH<sub>3</sub>C=O), 1.39 (3H, d,  $J = 1.0$  Hz, CH<sub>3</sub>COH), 1.37 (3H, s, CH<sub>3</sub>CC=O); <sup>13</sup>C NMR (101 MHz CDCl<sub>3</sub>) δ 217.5 (C), 147.7 (C), 146.6 (C), 145.8 (C), 133.0 (C), 131.9 (C), 131.4 (C), 128.4 (CH), 127.0 (CH), 125.5 (CH), 125.3 (CH), 123.4 (CH), 123.1 (CH), 109.3 (CH), 108.5 (CH), 101.2 (CH<sub>2</sub>), 75.0 (C), 54.7 (C), 37.0 (CH<sub>2</sub>), 26.7 (CH<sub>3</sub>), 26.1 (CH<sub>3</sub>), 18.9 (CH<sub>3</sub>); HRMS (ESI) Exact mass calculated for [C<sub>22</sub>H<sub>22</sub>NaO<sub>4</sub>]<sup>+</sup> [M+Na]<sup>+</sup>: 373.1410, found 373.1411; Enantiomeric excess was determined by HPLC with a Chiralpak AS-H column (80:20 isohexane:*i*-PrOH, 1.0 mL/min, 230 nm, 25 °C):  $t_r$  (minor) = 8.5 min,  $t_r$  (major) = 11.2 min, 90% ee.

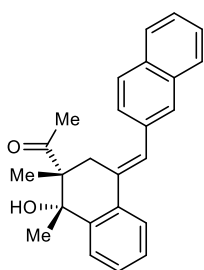

**1-[(1S,2R,E)-1-Hydroxy-1,2-dimethyl-4-(naphthalen-2-ylmethylene)-1,2,3,4-tetrahydronaphthalen-2-yl]ethanone (2m).** The title compound was prepared according to General Procedure A using alkynyl 1,3-diketone **1m** (83.4 mg, 0.30 mmol) and phenylboronic acid (73.2 mg, 0.60 mmol), and purified by column chromatography (5% to 10% EtOAc/pentane) to give a yellow solid (70.3 mg, 66%).

$R_f = 0.11$  (10% EtOAc/pentane); m.p. 110–111 °C (Et<sub>2</sub>O);  $[\alpha]_D^{20.4} -248$  (*c* 1.00, CHCl<sub>3</sub>); IR (ATR) 3449 (OH), 1686 (C=O), 1454, 1353, 1168, 1073, 949, 866, 789, 665 cm<sup>-1</sup>; <sup>1</sup>H NMR (400 MHz, CDCl<sub>3</sub>) δ 7.90–7.86 (3H, m, ArH), 7.84–7.82 (2H, m, ArH), 7.71 (1H, d,  $J = 7.6$  Hz, ArH), 7.57–7.46 (3H, m, ArH), 7.39–7.30 (2H, m, ArH and C=CH), 7.28–7.21 (1H, m, ArCH), 4.89 (1H, d,  $J = 1.0$  Hz, OH), 3.50 (1H, d,  $J = 16.5$  Hz, CH<sub>a</sub>H<sub>b</sub>), 3.04 (1 H, dd,  $J = 16.5, 2.5$  Hz, CH<sub>a</sub>H<sub>b</sub>), 1.88 (3H, s, CH<sub>3</sub>C=O), 1.45 (3H, s, CH<sub>3</sub>), 1.36 (3H, s, CH<sub>3</sub>); <sup>13</sup>C NMR (101 MHz CDCl<sub>3</sub>) δ 217.4 (C), 146.0 (C), 134.8 (C), 133.3 (C), 132.8 (C), 132.3 (2 × C), 128.7 (C), 128.13 (CH), 128.08 (CH), 128.0 (CH), 127.7 (CH), 127.4 (CH), 127.0 (CH), 126.4 (CH), 126.2 (CH), 125.7 (CH), 125.4 (CH), 123.3 (CH), 75.1 (C), 54.9 (C), 37.0 (CH<sub>2</sub>), 26.9 (CH<sub>3</sub>), 26.0 (CH<sub>3</sub>), 18.8 (CH<sub>3</sub>); HRMS (ESI) Exact mass calculated for [C<sub>25</sub>H<sub>24</sub>NaO<sub>2</sub>]<sup>+</sup> [M+Na]<sup>+</sup>: 379.1669, found 379.1664; Enantiomeric excess was determined by HPLC with a Chiralpak AS-H column (80:20 isohexane:*i*-PrOH, 1.0 mL/min, 280 nm, 25 °C):  $t_r$  (minor) = 5.9 min,  $t_r$  (major) = 6.9 min, 99% ee.

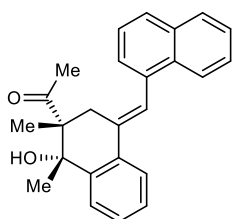

**1-[(1S,2R,E)-1-Hydroxy-1,2-dimethyl-4-(naphthalen-1-ylmethylene)-1,2,3,4-tetrahydronaphthalen-2-yl]ethan-1-one (2n).** The title compound was prepared according to General Procedure A using alkynyl 1,3-diketone **1n** (83.4 mg, 0.30 mmol) and phenylboronic acid (73.2 mg, 0.60 mmol), and purified by column chromatography (5% Et<sub>2</sub>O/CHCl<sub>3</sub>) to give a yellow solid (42.7 mg, 40%).

$R_f = 0.35$  (5% Et<sub>2</sub>O/CHCl<sub>3</sub>); m.p. 72–74 °C (Et<sub>2</sub>O);  $[\alpha]_D^{19.9} -224$  (*c* 1.00, CHCl<sub>3</sub>); IR (ATR)

3453 (OH), 3057, 2979, 2937, 1687 (C=O), 1353, 1106, 788, 763, 515  $\text{cm}^{-1}$ ;  $^1\text{H}$  NMR (400 MHz,  $\text{CDCl}_3$ )  $\delta$  7.96 (1H, dd,  $J = 8.4, 1.3$  Hz, ArH), 7.92 (1H, dd,  $J = 7.8, 1.6$  Hz, ArH), 7.88-7.83 (2H, m, ArH), 7.80 (1H, dd,  $J = 8.1, 1.3$  Hz, ArH), 7.61 (1H, t,  $J = 1.6$  Hz, C=CH), 7.56-7.47 (3H, m, ArH), 7.44-7.35 (2H, m, ArH), 7.32-7.28 (1H, m, ArH), 4.85 (1H, d,  $J = 1.4$  Hz, OH), 3.14 (1H, dd,  $J = 16.6, 1.0$  Hz,  $\text{CH}_a\text{H}_b$ ), 2.83 (1H, dd,  $J = 16.6, 2.6$  Hz,  $\text{CH}_a\text{H}_b$ ), 1.80 (3H, s,  $\text{CH}_3\text{C}=\text{O}$ ), 1.44 (3H, d,  $J = 1.3$  Hz,  $\text{CH}_3$ ), 1.26 (3H, s,  $\text{CH}_3$ );  $^{13}\text{C}$  NMR (101 MHz,  $\text{CDCl}_3$ )  $\delta$  217.3 (C), 146.0 (C), 134.5 (C), 134.3 (C), 133.7 (C), 132.4 (C), 132.0 (C), 128.8 (CH), 128.6 (CH), 127.9 (CH), 127.1 (CH), 126.7 (CH), 126.3 (CH), 126.1 (CH), 125.6 (CH), 125.4 (CH), 124.7 (CH), 123.5 (CH), 123.3 (CH), 75.1 (C), 55.0 (C), 37.0 ( $\text{CH}_2$ ), 27.1 ( $\text{CH}_3$ ), 25.9 ( $\text{CH}_3$ ), 18.7 ( $\text{CH}_3$ ); HRMS (ESI) Exact mass calculated for  $\text{C}_{25}\text{H}_{24}\text{NaO}_2^+$   $[\text{M}+\text{Na}]^+$ : 379.1669, found: 379.1661; Enantiomeric excess was determined by HPLC with a Chiralpak AS-H column (80:20 isohexane:*i*-PrOH, 0.5 mL/min, 210 nm, 23 °C):  $t_r$  (minor) = 11.4 min,  $t_r$  (major) = 12.7 min, 92% ee.

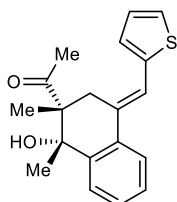

**1-[(1S,2R,E)-1-Hydroxy-1,2-dimethyl-4-(thiophen-2-ylmethylene)-1,2,3,4-tetrahydronaphthalen-2-yl]ethan-1-one (2o).** The title compound was prepared

according to General Procedure A using alkynyl 1,3-diketone **1o** (70.2 mg, 0.30 mmol) and phenylboronic acid (73.2 mg, 0.60 mmol), and purified by column chromatography (10% EtOAc/pentane) to give a yellow oil (61.5 mg, 66%).  $R_f = 0.11$  (10% EtOAc/pentane);  $[\alpha]_D^{20.3} +12$  ( $c$  1.00,  $\text{CHCl}_3$ ); IR (ATR) 3461 (OH), 3064, 2974, 2928, 1684 (C=O), 1352, 1073, 758, 693  $\text{cm}^{-1}$ ;  $^1\text{H}$  NMR (400 MHz,  $\text{CDCl}_3$ )  $\delta$  7.77 (1H, dd,  $J = 7.8, 1.4$  Hz, ArH), 7.62 (1H, dd,  $J = 8.0, 1.3$  Hz, ArH), 7.41 (1H, dd,  $J = 5.2, 1.0$  Hz, ArH), 7.34-7.28 (2H, m, ArH and C=CH), 7.25-7.19 (2H, m, ArH), 7.14 (1H, dd,  $J = 5.1, 3.6$  Hz, ArH), 4.92 (1H, s, OH), 3.55 (1H, dd,  $J = 17.9, 1.7$  Hz,  $\text{CH}_a\text{H}_b$ ), 2.91 (1H, dd,  $J = 17.9, 2.6$  Hz,  $\text{CH}_a\text{H}_b$ ), 2.01 (3H, s,  $\text{CH}_3\text{C}=\text{O}$ ), 1.47 (3H, s,  $\text{CH}_3\text{COH}$ ), 1.35 (3H, s,  $\text{CH}_3\text{CC}=\text{O}$ );  $^{13}\text{C}$  NMR (101 MHz,  $\text{CDCl}_3$ )  $\delta$  218.4 (C), 145.8 (C), 140.7 (C), 133.2 (C), 130.3 (C), 128.6 (CH), 128.3 (CH), 127.4 (CH), 127.2 (CH), 126.2 (CH), 124.6 (CH), 123.2 (CH), 119.1 (CH), 75.0 (C), 53.7 (C), 37.5 ( $\text{CH}_2$ ), 27.2 ( $\text{CH}_3$ ), 25.3 ( $\text{CH}_3$ ), 19.3 ( $\text{CH}_3$ ); HRMS (ESI) Exact mass calculated for  $\text{C}_{19}\text{H}_{20}\text{NaO}_2\text{S}^+$   $[\text{M}+\text{Na}]^+$ : 335.1076, found: 335.1072; Enantiomeric excess was determined by HPLC with a Chiralpak AS-H column (80:20 isohexane:*i*-PrOH, 1.0 mL/min, 280 nm, 23 °C):  $t_r$  (minor) = 5.9 min,  $t_r$  (major) = 7.1 min, 97% ee.

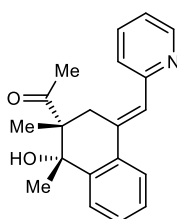

**1-[(1S,2R,E)-1-Hydroxy-1,2-dimethyl-4-(pyridin-2-ylmethylene)-1,2,3,4-tetrahydronaphthalen-2-yl]ethanone (2p).** The title compound was prepared

according to General Procedure A using alkynyl 1,3-diketone **1p** (68.7 mg, 0.30 mmol) and phenylboronic acid (73.2 mg, 0.60 mmol), and purified by column chromatography (5% to 10% EtOAc/pentane) to give a yellow oil (62.1 mg, 67%).



$R_f = 0.14$  (10% EtOAc/pentane);  $[\alpha]_D^{20.4} -12$  ( $c$  1.00,  $\text{CHCl}_3$ ); IR (ATR) 3443 (OH), 1686 (C=O), 1456, 1377, 1149, 1073, 929, 865, 756, 674  $\text{cm}^{-1}$ ;  $^1\text{H}$  NMR (400 MHz,  $\text{CDCl}_3$ )  $\delta$  8.69 (1H, dd,  $J = 4.8, 1.0$  Hz, ArH), 7.81 (1H, dd,  $J = 7.8, 1.2$  Hz, ArH), 7.71–7.67 (2H, m, ArH), 7.37–7.29 (2H, m, ArH), 7.25–7.20 (1H, m, ArH), 7.14 (1H, ddd,  $J = 7.5, 4.8, 1.0$  Hz, ArH), 7.07 (1H, br s, C=CH), 4.95 (1H, d,  $J = 1.2$  Hz, OH), 4.31 (1H, dd,  $J = 18.3, 1.2$  Hz,  $\text{CH}_a\text{H}_b$ ), 3.10 (1H, dd,  $J = 18.3, 2.6$  Hz,  $\text{CH}_a\text{H}_b$ ), 1.98 (3H, s,  $\text{CH}_3\text{C}=\text{O}$ ), 1.43 (3H, s,  $\text{CH}_3\text{CC}=\text{O}$ ), 1.39 (3H, d,  $J = 1.2$  Hz,  $\text{CH}_3\text{COH}$ );  $^{13}\text{C}$  NMR (101 MHz  $\text{CDCl}_3$ )  $\delta$  218.6 (C), 156.7 (C), 149.2 (C), 146.9 (C), 137.5 (C), 136.2 (CH), 133.2 (CH), 129.1 (CH), 127.0 (CH), 125.5 (CH), 125.1 (CH), 123.8 (CH), 123.5 (CH), 121.1 (CH), 75.0 (C), 54.4 (C), 36.9 ( $\text{CH}_2$ ), 26.8 ( $\text{CH}_3$ ), 26.1 ( $\text{CH}_3$ ), 19.1 ( $\text{CH}_3$ ); HRMS (ESI) Exact mass calculated for  $[\text{C}_{20}\text{H}_{21}\text{NNaO}_2]^+ [\text{M}+\text{Na}]^+$ : 330.1464, found 330.1459; Enantiomeric excess was determined by HPLC with a Chiralpak AS-H column (80:20 isohexane:*i*-PrOH, 0.8 mL/min, 280 nm, 25 °C):  $t_r$  (minor) = 8.2 min,  $t_r$  (major) = 11.3 min, 96% ee.

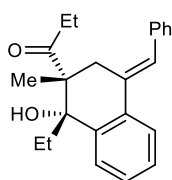

**1-((1S,2R)-4-[(E)-Benzylidene]-1-ethyl-1-hydroxy-2-methyl-1,2,3,4-tetrahydronaphthalen-2-yl)propan-1-one (2q).** The title compound was prepared

according to General Procedure A using alkynyl 1,3-diketone **1q** (76.8 mg, 0.30 mmol) and phenylboronic acid (73.2 mg, 0.60 mmol), and purified by column chromatography (5% to 10% EtOAc/pentane) to give a yellow solid (62.9 mg, 63%).  $R_f = 0.14$  (10% EtOAc/pentane); m.p. 107–108 °C ( $\text{Et}_2\text{O}$ );  $[\alpha]_D^{20.3} +60$  ( $c$  1.00,  $\text{CHCl}_3$ ); IR (ATR) 3409 (OH), 1679 (C=O), 1460, 1372, 1216, 1141, 1098, 997, 870, 763  $\text{cm}^{-1}$ ;  $^1\text{H}$  NMR (400 MHz,  $\text{CDCl}_3$ )  $\delta$  7.67 (1H, dd,  $J = 7.7, 1.4$  Hz, ArH), 7.63 (1H, dd,  $J = 7.8, 1.2$  Hz, ArH), 7.48–7.40 (4H, m, ArH), 7.33–7.26 (2H, m, ArH), 7.22 (1H, ddd,  $J = 6.8, 6.2, 2.4$  Hz, ArH), 7.06 (1H, app d,  $J = 2.1$  Hz, C=CH), 3.49 (1H, dd,  $J = 18.2, 1.8$ ,  $\text{CH}_a\text{H}_b\text{C}=\text{O}$ ), 2.99 (1H, dd,  $J = 18.2, 2.6$  Hz,  $\text{CH}_a\text{H}_b\text{C}=\text{O}$ ), 2.48 (1H, dq,  $J = 18.6, 7.1$  Hz,  $\text{CH}_3\text{CH}_2\text{C}=\text{O}$ ), 2.14 (1H, dq,  $J = 18.6, 7.1$  Hz,  $\text{CH}_3\text{CH}_2\text{C}=\text{O}$ ), 1.88 (1H, dq,  $J = 14.6, 7.3$  Hz,  $\text{CH}_3\text{CH}_2\text{COH}$ ), 1.57–1.46 (1H, m,  $\text{CH}_3\text{CH}_2\text{COH}$ ), 1.35 (3H, s,  $\text{CH}_3\text{CC}=\text{O}$ ), 0.77 (3H, t,  $J = 7.3$  Hz,  $\text{CH}_3\text{CH}_2\text{COH}$ ), 0.72 (3H, t,  $J = 7.1$  Hz,  $\text{CH}_3\text{CH}_2\text{C}=\text{O}$ );  $^{13}\text{C}$  NMR (101 MHz  $\text{CDCl}_3$ )  $\delta$  221.1 (C), 143.3 (C), 137.5 (C), 134.2 (C), 133.1 (C), 129.3 (2  $\times$  CH), 128.5 (2  $\times$  CH), 127.4 (CH), 127.04 (CH), 127.01 (CH), 126.3 (CH), 126.0 (CH), 123.9 (CH), 76.6 (C), 54.2 (C), 36.1 ( $\text{CH}_2$ ), 32.0 ( $\text{CH}_2$ ), 27.8 ( $\text{CH}_2$ ), 19.4 ( $\text{CH}_3$ ), 7.4 ( $\text{CH}_3$ ), 7.1 ( $\text{CH}_3$ ); HRMS (ESI) Exact mass calculated for  $[\text{C}_{23}\text{H}_{26}\text{NaO}_2]^+ [\text{M}+\text{Na}]^+$ : 357.1825, found 357.1815; Enantiomeric excess was determined by HPLC with a Chiralpak AD-H column (97:03 isohexane:*i*-PrOH, 1.0 mL/min, 280 nm, 25 °C):  $t_r$  (minor) = 6.2 min,  $t_r$  (major) = 7.6 min, 96% ee.

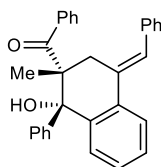

**{(1S,2R)-4-[(E)-Benzylidene]-1-hydroxy-2-methyl-1-phenyl-1,2,3,4-tetrahydronaphthalen-2-yl}(phenyl)methanone (2r).**<sup>11</sup> The title compound was

prepared according to General Procedure A using alkynyl 1,3-diketone **1r** (105.6 mg, 0.30 mmol) and phenylboronic acid (73.2 mg, 0.60 mmol), and purified by column chromatography (5% to 10% EtOAc/pentane) to give a white solid (62.2 mg, 48%) whose spectroscopic data were consistent with those reported previously.<sup>11</sup>  $R_f = 0.14$  (10% EtOAc/pentane);  $[\alpha]_D^{20.5} -160$  ( $c$  0.50,  $\text{CHCl}_3$ ); IR (ATR) 3423 (OH), 1655 (C=O), 1445, 1368, 1179, 1041, 906, 758  $\text{cm}^{-1}$ ; m.p. 149–150 °C ( $\text{Et}_2\text{O}$ );  $^1\text{H}$  NMR (400 MHz,  $\text{CDCl}_3$ )  $\delta$  7.77–7.65 (2H, m, ArH), 7.37–7.28 (6H, m, ArH), 7.25 (1H, s, C=CH), 7.24–7.14 (6H, m, ArH), 7.04 (3H, m, ArH), 6.91 (2H, d,  $J = 6.8$  Hz, ArH), 5.88 (1H, s, OH), 3.48 (1H, d,  $J = 16.7$  Hz,  $\text{CH}_a\text{H}_b$ ), 2.74 (1H, dd,  $J = 16.7, 2.6$  Hz,  $\text{CH}_a\text{H}_b$ ), 1.46 (3H, s,  $\text{CH}_3$ );  $^{13}\text{C}$  NMR (101 MHz  $\text{CDCl}_3$ )  $\delta$  213.5 (C), 144.5 (C), 142.7 (C), 138.8 (C), 137.0 (C), 134.4 (C), 132.7 (C), 130.9 (CH), 129.2 (2  $\times$  CH), 129.1 (2  $\times$  CH), 128.8 (CH), 128.0 (2  $\times$  CH), 127.6 (2  $\times$  CH), 127.4 (CH), 127.2 (3  $\times$  CH), 127.1 (CH), 127.0 (2  $\times$  CH), 126.7 (CH), 125.8 (CH), 122.7 (CH), 80.5 (C), 54.9 (C), 36.4 ( $\text{CH}_2$ ), 20.1 ( $\text{CH}_3$ ); HRMS (ESI) Exact mass calculated for  $[\text{C}_{31}\text{H}_{26}\text{NaO}_2]^+ [\text{M}+\text{Na}]^+$ : 453.1825, found 453.1814; Enantiomeric excess was determined by HPLC with a Chiralpak AD-H column (97:3 isohexane:*i*-PrOH, 1.0 mL/min, 280 nm, 25 °C):  $t_r$  (major) = 9.1 min,  $t_r$  (minor) = 19.8 min, 56% ee.

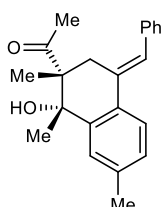

**1-[(1S,2R,E)-4-Benzylidene-1-hydroxy-1,2-dimethyl-1,2,3,4-tetrahydronaphthalen-2-yl]ethanone (2s).** The title compound was prepared

according to General Procedure A using alkynyl 1,3-diketone **1a** (68.5 mg, 0.30 mmol) and phenylboronic acid (73.2 mg, 0.60 mmol), and purified by column chromatography (5% to 10% EtOAc/pentane) to give a yellow solid (57 mg, 59%).  $R_f = 0.12$  (10% EtOAc/pentane); m.p. 126–127 °C ( $\text{Et}_2\text{O}$ );  $[\alpha]_D^{25.0} -252$  ( $c$  1.00,  $\text{CHCl}_3$ ); IR (ATR) 3465 (OH), 1683 (C=O), 1495, 1377, 1353, 1351, 1077, 929, 767, 696, 581  $\text{cm}^{-1}$ ;  $^1\text{H}$  NMR (400 MHz,  $\text{CDCl}_3$ )  $\delta$  7.60 (1H, d,  $J = 0.8$  Hz, ArH), 7.54 (1H, t,  $J = 6.0$  Hz, ArH), 7.44–7.33 (4H, m, ArH), 7.28 (1H, ddd,  $J = 7.3, 3.2, 1.8$  Hz, ArH), 7.11 (1H, app d,  $J = 1.9$  Hz, C=CH), 7.03 (1H, ddd,  $J = 8.1, 1.9, 0.6$  Hz, ArH), 4.86 (1H, d,  $J = 1.2$  Hz, OH), 3.38 (1H, dd,  $J = 16.6, 1.0$  Hz,  $\text{CH}_a\text{H}_b$ ), 2.91 (1H, dd,  $J = 16.6, 2.6$  Hz,  $\text{CH}_a\text{H}_b$ ), 2.37 (3H, s, Ar $\text{CH}_3$ ), 1.88 (3H, s,  $\text{CH}_3\text{C}=\text{O}$ ), 1.39 (3H, d,  $J = 1.2$  Hz,  $\text{CH}_3\text{COH}$ ), 1.35 (3H, s,  $\text{CH}_3\text{CC}=\text{O}$ );  $^{13}\text{C}$  NMR (101 MHz  $\text{CDCl}_3$ )  $\delta$  217.7 (C), 145.8 (C), 138.5 (C), 137.4 (C), 132.8 (C), 130.1 (C), 129.3 (2  $\times$  CH), 128.5 (2  $\times$  CH), 128.0 (CH), 126.9 (CH), 125.8 (CH), 124.6 (CH), 123.3 (CH), 75.0 (C), 54.7 (C), 37.0 ( $\text{CH}_2$ ), 26.7 ( $\text{CH}_3$ ), 26.1 ( $\text{CH}_3$ ), 21.4 ( $\text{CH}_3$ ), 18.9 ( $\text{CH}_3$ ); HRMS (ESI) Exact mass calculated for  $[\text{C}_{22}\text{H}_{22}\text{NaO}_2]^+ [\text{M}+\text{Na}]^+$ : 343.1669, found 343.1665; Enantiomeric excess

was determined by HPLC with a Chiralpak AS-H column (80:20 isohexane:*i*-PrOH, 0.8 mL/min, 280 nm, 25 °C):  $t_r$  (minor) = 5.9 min,  $t_r$  (major) = 7.1 min, 94% ee.

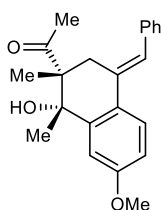

**1-[(1S,2R)-4-[(*E*)-Benzylidene]-1-hydroxy-7-methoxy-1,2-dimethyl-1,2,3,4-tetrahydronaphthalen-2-yl]ethan-1-one (2t).** The title compound was prepared

according to General Procedure A using alkynyl 1,3-diketone **1a** (68.4 mg, 0.30 mmol) and 4-methoxyphenylboronic acid (91.8 mg, 0.60 mmol), and purified by column chromatography (10% EtOAc/pentane) to give a yellow oil (53.2 mg, 53%).  $R_f$  = 0.15 (10% EtOAc/pentane);  $[\alpha]_D^{20.1}$  –200 (*c* 1.00, CHCl<sub>3</sub>); IR (ATR) 3450 (OH), 2965, 2935, 1686 (C=O), 1600, 1354, 1068, 1030, 768, 697 cm<sup>-1</sup>; <sup>1</sup>H NMR (400 MHz, CDCl<sub>3</sub>)  $\delta$  7.60 (1H, d,  $J$  = 8.7 Hz, ArH), 7.43–7.40 (2H, m, ArH), 7.38–7.32 (3H, m, ArH), 7.31–7.28 (1H, m, ArH), 7.04 (1H, app d,  $J$  = 2.5 Hz, C=CH), 6.79 (1H, dd,  $J$  = 8.8, 2.8 Hz, ArH), 4.96 (1H, d,  $J$  = 1.4 Hz, OH), 3.86 (3H, s, OCH<sub>3</sub>), 3.38 (1H, dd,  $J$  = 16.7, 1.2 Hz, CH<sub>a</sub>H<sub>b</sub>), 2.92 (1H, dd,  $J$  = 16.7, 2.7 Hz, CH<sub>a</sub>H<sub>b</sub>), 1.90 (3H, s, CH<sub>3</sub>C=O), 1.41 (3H, d,  $J$  = 1.4 Hz, CH<sub>3</sub>COH), 1.36 (3H, s, CH<sub>3</sub>CC=O); <sup>13</sup>C NMR (101 MHz, CDCl<sub>3</sub>)  $\delta$  217.8 (C), 160.1 (C), 147.8 (C), 137.5 (C), 132.4 (C), 129.2 (2 × CH), 128.5 (2 × CH), 126.8 (CH), 125.6 (C), 124.9 (CH), 123.5 (CH), 114.1 (CH), 109.2 (CH), 75.2 (C), 55.3 (CH<sub>3</sub>), 54.6 (C), 37.0 (CH<sub>2</sub>), 26.6 (CH<sub>3</sub>), 26.1 (CH<sub>3</sub>), 18.9 (CH<sub>3</sub>); HRMS (ESI) Exact mass calculated for C<sub>22</sub>H<sub>24</sub>NaO<sub>3</sub><sup>+</sup> [M+Na]<sup>+</sup>: 359.1618, found: 359.1614; Enantiomeric excess was determined by HPLC with a Chiralpak AS-H column (80:20 isohexane:*i*-PrOH, 1.0 mL/min, 280 nm, 23 °C):  $t_r$  (minor) = 6.1 min,  $t_r$  (major) = 8.5 min, 96% ee.

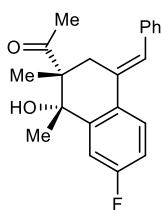

**1-[(1S,2R)-4-[(*E*)-Benzylidene]-7-fluoro-1-hydroxy-1,2-dimethyl-1,2,3,4-tetrahydronaphthalen-2-yl]ethan-1-one (2u).** The title compound was prepared

according to General Procedure A using alkynyl 1,3-diketone **1a** (68.4 mg, 0.30 mmol) and 4-fluorophenylboronic acid (84.0 mg, 0.60 mmol), and purified by column chromatography (10% EtOAc/pentane) to give a yellow solid (72.3 mg, 74%).  $R_f$  = 0.11 (10% EtOAc/pentane); m.p. 129–131 °C (Et<sub>2</sub>O);  $[\alpha]_D^{20.1}$  –228 (*c* 1.00, CHCl<sub>3</sub>); IR (ATR) 3475 (OH), 2973, 2919, 1686 (C=O), 1479, 1374, 1064, 769, 696 cm<sup>-1</sup>; <sup>1</sup>H NMR (400 MHz, CDCl<sub>3</sub>)  $\delta$  7.62 (1H, dd,  $J$  = 8.8, 5.5 Hz, ArH), 7.50 (1H, dd,  $J$  = 10.0, 2.8 Hz, ArH), 7.46–7.40 (2H, m, ArH), 7.38–7.29 (3H, m, ArH), 7.08 (1H, app d,  $J$  = 1.7 Hz, C=CH), 6.92 (1H, ddd,  $J$  = 8.8, 7.9, 2.8 Hz, ArH), 4.91 (1H, d,  $J$  = 1.4 Hz, OH), 3.39 (1H, dd,  $J$  = 16.6, 1.1 Hz, CH<sub>a</sub>H<sub>b</sub>), 2.91 (1H, dd,  $J$  = 16.6, 2.7 Hz, CH<sub>a</sub>H<sub>b</sub>), 1.89 (3H, s, CH<sub>3</sub>C=O), 1.40 (3H, d,  $J$  = 1.4 Hz, CH<sub>3</sub>COH), 1.36 (3H, s, CH<sub>3</sub>CC=O); <sup>13</sup>C NMR (101 MHz, CDCl<sub>3</sub>)  $\delta$  217.3 (C), 163.3 (C,  $J_{CF}$  = 248.0 Hz), 148.6 (C), 137.1 (C), 131.9 (C), 129.2 (2 × CH), 129.0 (C), 128.6 (2 × CH), 127.2 (CH), 125.4 (CH), 125.3 (CH,  $J_{CF}$  = 7.9 Hz), 114.4 (CH,  $J_{CF}$  = 22.0 Hz), 112.1 (CH,  $J_{CF}$  = 22.7 Hz), 74.9 (C), 54.7 (CH), 36.8 (CH<sub>2</sub>), 26.7 (CH<sub>3</sub>), 25.9

(CH<sub>3</sub>), 18.8 (CH<sub>3</sub>); <sup>19</sup>F NMR (376 MHz, CDCl<sub>3</sub>) δ -113.1; HRMS (ESI) Exact mass calculated for C<sub>21</sub>H<sub>21</sub>FN<sub>2</sub>O<sub>2</sub><sup>+</sup> [M+Na]<sup>+</sup>: 347.1418, found: 347.1416; Enantiomeric excess was determined by HPLC with a Chiralpak AD-H column (90:10 isohexane:*i*-PrOH, 1.0 mL/min, 280 nm, 23 °C): t<sub>r</sub> (minor) = 6.3 min, t<sub>r</sub> (major) = 6.7 min, 93% ee.

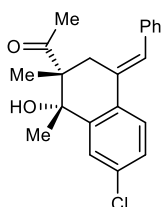

**1-[(1S,2R,E)-4-Benzylidene-7-chloro-1-hydroxy-1,2-dimethyl-1,2,3,4-tetrahydronaphthalen-2-yl]ethanone (2v).** The title compound was prepared

according to General Procedure A using alkynyl 1,3-diketone **1a** (68.5 mg, 0.30 mmol) and phenylboronic acid (73.2 mg, 0.60 mmol), and purified by column chromatography (5% to 10% EtOAc/pentane) to give a yellow solid (53 mg, 52%). R<sub>f</sub>

= 0.16 (10% EtOAc/pentane); m.p. 109–110 °C (Et<sub>2</sub>O); [α]<sub>D</sub><sup>24.9</sup> -224 (c 1.00, CHCl<sub>3</sub>); IR (ATR) 3471 (OH), 1684 (C=O), 1492, 1353, 1351, 1075, 931, 873, 759, 695 cm<sup>-1</sup>; <sup>1</sup>H NMR (400 MHz, CDCl<sub>3</sub>) δ 7.77 (1H, dd, *J* = 16.8, 4.0 Hz, ArH), 7.55 (1H, t, *J* = 11.5 Hz, ArH), 7.45–7.39 (2H, m, ArH), 7.38–7.29 (3H, m, ArH), 7.18 (1H, dd, *J* = 8.6, 2.3 Hz, ArH), 7.12 (1H, app d, *J* = 2.1 Hz, C=CH), 4.88 (1H, d, *J* = 1.3 Hz, OH), 3.39 (1H, dd, *J* = 16.6, 0.8 Hz, CH<sub>a</sub>H<sub>b</sub>), 2.90 (1H, dd, *J* = 16.6, 2.6 Hz, CH<sub>a</sub>H<sub>b</sub>), 1.88 (3H, s, CH<sub>3</sub>C=O), 1.39 (3H, d, *J* = 1.3 Hz, CH<sub>3</sub>COH), 1.35 (3H, s, CH<sub>3</sub>CC=O); <sup>13</sup>C NMR (101 MHz CDCl<sub>3</sub>) δ 217.2 (C), 147.7 (C), 136.9 (C), 134.6 (C), 131.8 (C), 131.4 (C), 129.3 (2 × CH), 128.6 (2 × CH), 127.32 (CH), 127.26 (CH), 126.2 (CH), 125.6 (CH), 124.8 (CH), 74.9 (C), 54.6 (C), 36.7 (CH<sub>2</sub>), 26.7 (CH<sub>3</sub>), 25.9 (CH<sub>3</sub>), 18.7 (CH<sub>3</sub>); HRMS (ESI) Exact mass calculated for [C<sub>21</sub>H<sub>21</sub>ClNaO<sub>2</sub>]<sup>+</sup> [M+Na]<sup>+</sup>: 363.1122, found 363.1119; Enantiomeric excess was determined by HPLC with a Chiralpak AS-H column (93:7 isohexane:*i*-PrOH, 0.8 mL/min, 280 nm, 25 °C): t<sub>r</sub> (minor) = 13.2 min, t<sub>r</sub> (major) = 14.1 min, 88% ee.

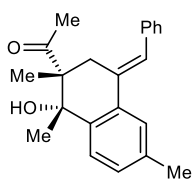

**1-[(1S,2R)-4-(E)-Benzylidene]-1-hydroxy-1,2,6-trimethyl-1,2,3,4-tetrahydronaphthalen-2-yl]ethan-1-one (2x).** The title compound was prepared

according to General Procedure A using alkynyl 1,3-diketone **1a** (68.4 mg, 0.30 mmol) and 3-methylphenylboronic acid (81.6 mg, 0.60 mmol), and purified by

column chromatography (10% EtOAc/pentane) to give a yellow oil (70.8 mg, 74%). R<sub>f</sub> = 0.14 (10% EtOAc/pentane); [α]<sub>D</sub><sup>20.1</sup> -208 (c 1.00, CHCl<sub>3</sub>); IR (ATR) 3471 (OH), 3021, 2979, 1681 (C=O), 1352, 1073, 768, 699 cm<sup>-1</sup>; <sup>1</sup>H NMR (400 MHz, CDCl<sub>3</sub>) δ 7.69 (1H, d, *J* = 8.0 Hz, ArH), 7.46 (1H, s, ArH), 7.44–7.41 (2H, m, ArH), 7.39–7.35 (2H, m, ArH), 7.34–7.28 (1H, m, ArH), 7.19–7.12 (2H, m, C=CH and ArH), 4.85 (1H, d, *J* = 1.3 Hz, OH), 3.40 (1H, dd, *J* = 16.6, 1.2 Hz, CH<sub>a</sub>H<sub>b</sub>), 2.92 (1H, dd, *J* = 16.5, 2.7 Hz, CH<sub>a</sub>H<sub>b</sub>), 2.36 (3H, s, ArCH<sub>3</sub>), 1.89 (3H, s, CH<sub>3</sub>C=O), 1.40 (1H, d, *J* = 1.4 Hz, CH<sub>3</sub>COH), 1.35 (3H, s, CH<sub>3</sub>CC=O); <sup>13</sup>C NMR (101 MHz, CDCl<sub>3</sub>) δ 217.5 (C), 143.1 (C), 137.3 (C), 136.4 (C), 132.9 (C), 132.7 (C), 129.6 (CH), 129.3 (2 × CH), 128.5 (2 × CH), 127.0 (CH), 125.5

(CH), 125.3 (CH), 123.7 (CH), 75.0 (C), 54.8 (C), 36.9 (CH<sub>2</sub>), 26.8 (CH<sub>3</sub>), 26.1 (CH<sub>3</sub>), 21.2 (CH<sub>3</sub>), 18.8 (CH<sub>3</sub>); HRMS (ESI) Exact mass calculated for C<sub>22</sub>H<sub>24</sub>NaO<sub>2</sub><sup>+</sup> [M+Na]<sup>+</sup>: 343.1669, found: 343.1663; Enantiomeric excess was determined by HPLC with a Chiralpak AS-H column (95:5 isohexane:*i*-PrOH, 1.0 mL/min, 280 nm, 23 °C): *t*<sub>r</sub> (minor) = 7.1 min, *t*<sub>r</sub> (major) = 7.8 min, 90% ee.

## General Procedure B

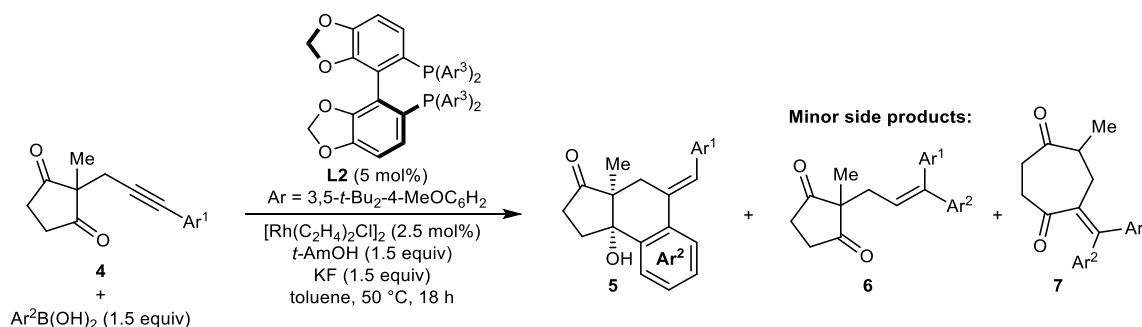

[Rh(C<sub>2</sub>H<sub>4</sub>)<sub>2</sub>Cl]<sub>2</sub> (2.9 mg, 0.0075 mmol) and (*S*)-DTBM-SEGPHOS (**L2**, 17.7 mg, 0.015 mmol) were added to an oven-dried microwave vial, which was sealed with a septum and purged with argon for 30 min. Degassed toluene (2.5 mL) was added and the mixture was stirred at room temperature for 30 min under argon. In a separate oven-dried microwave vial the alkyne 1,3-diketone (0.30 mmol), boronic acid (0.45 mmol), and KF (26.1 mg, 0.45 mmol) were added. A septum was fitted and the vial was purged with argon for 30 min. The catalyst solution was added to the vial containing the alkyne 1,3-diketone using additional toluene (0.5 mL) as a rinse. *t*-Amyl alcohol (49 μL, 0.45 mmol) was added and the mixture was stirred at 50 °C for 18 h. The reaction was cooled to room temperature, diluted with H<sub>2</sub>O and saturated aqueous NH<sub>4</sub>Cl solution, and extracted with EtOAc. The combined organic layers were washed with brine, dried (Na<sub>2</sub>SO<sub>4</sub>), filtered, and concentrated *in vacuo*. Purification of the residue by column chromatography gave the arylative cyclization product **5**. In most cases, small quantities of minor products **6** and **7** were also observed in the <sup>1</sup>H NMR spectra of the crude material, but with the exception of the reaction forming arylative cyclization product **5g** (*vide infra*), these were not isolated.

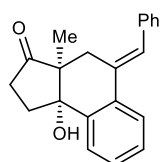

(**3aS,9bS**)-5-[(*E*)-Benzylidene]-9b-hydroxy-3a-methyl-1,2,3a,4,5,9b-hexahydro-3H-cyclopenta[*a*]naphthalen-3-one (**5a**).<sup>1</sup> The title compound was prepared according to General Procedure B using alkyne 1,3-diketone **4a** (67.8 mg, 0.30 mmol) and phenylboronic acid (54.9 mg, 0.45 mmol), and purified by column chromatography (10% EtOAc/petroleum ether) to give a white solid (63 mg, 69%) whose spectroscopic data matched those reported previously.<sup>1</sup>

m.p. 145–147 °C (MeOH); [α]<sub>D</sub><sup>20.1</sup> –164 (c 1.00, CH<sub>2</sub>Cl<sub>2</sub>); Enantiomeric excess was determined by HPLC with a Chiralpak IA-3 column (80:20

isohexane:*i*-PrOH, 1.0 mL/min, 230 nm, 23 °C):  $t_r$  (minor) = 13.5 min,  $t_r$  (major) = 15.3 min, 95% ee.

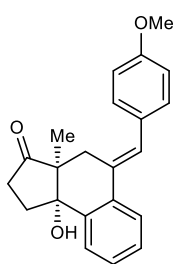

**(3a*S*,9b*S*)-9b-Hydroxy-5-[(*E*)-4-methoxybenzylidene]-3a-methyl-1,2,3a,4,5,9b-hexahydro-3*H*-cyclopenta[*a*]naphthalene-3-one (5b).**<sup>1</sup> The title compound was prepared according to General Procedure B using alkynyl 1,3-diketone **4b** (76.8 mg, 0.30 mmol) and phenylboronic acid (54.8 mg, 0.45 mmol), and purified by column chromatography (20% EtOAc/pentane) to give a white solid (37.7 mg, 39%) whose

spectroscopic data matched those reported previously.<sup>1</sup> m.p. 173–175 °C (Et<sub>2</sub>O);  $[\alpha]_D^{20.1} -172$  (*c* 1.00, CHCl<sub>3</sub>); Enantiomeric excess was determined by HPLC with a Chiralpak AD-H column (80:20 isohexane:*i*-PrOH, 1.0 mL/min, 280 nm, 23 °C):  $t_r$  (minor) = 9.6 min,  $t_r$  (major) = 17.3 min, 98% ee.

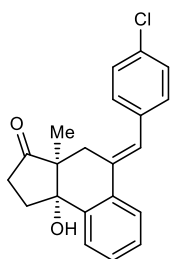

**(3a*S*,9b*S*)-9b-Hydroxy-5-[(*E*)-4-chlorobenzylidene]-3a-methyl-1,2,3a,4,5,9b-hexahydro-3*H*-cyclopenta[*a*]naphthalen-3-one (5c).**<sup>1</sup> The title compound was prepared according to General Procedure B using alkynyl 1,3-diketone **4c** (78.2 mg, 0.30 mmol) and phenylboronic acid (54.8 mg, 0.45 mmol), and purified by column chromatography (10:8:1 petroleum ether/CH<sub>2</sub>Cl<sub>2</sub>/EtOAc) to give a pale yellow solid

(75.3 mg, 74%) whose spectroscopic data matched those reported previously.<sup>1</sup> m.p. 207–208 °C (MeOH);  $[\alpha]_D^{22.0} -236$  (*c* 1.00, CH<sub>2</sub>Cl<sub>2</sub>); Enantiomeric excess was determined by HPLC with a Chiralpak IA-3 column (80:20 isohexane:*i*-PrOH, 1.0 mL/min, 230 nm, 23 °C):  $t_r$  (minor) = 13.7 min,  $t_r$  (major) = 16.4 min, 99% ee.

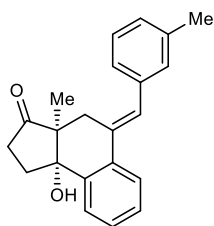

**(3a*S*,9b*S*)-9b-Hydroxy-3a-methyl-5-[(*E*)-3-methylbenzylidene]-1,2,3a,4,5,9b-hexahydro-3*H*-cyclopenta[*a*]naphthalen-3-one (5d).**<sup>1</sup> The title compound was prepared according to a modification of General Procedure B (in that the quantities of the rhodium precatalyst, ligand, and boronic acid were increased) using [Rh(C<sub>2</sub>H<sub>4</sub>)<sub>2</sub>Cl]<sub>2</sub> (5.8 mg, 0.015 mmol), (*S*)-DTBM-SEGPHOS

(**L2**, 35.4 mg, 0.03 mmol), alkynyl 1,3-diketone **4d** (81.3 mg, 0.30 mmol), and phenylboronic acid (73.2 mg, 0.60 mmol), and purified by column chromatography (10% Et<sub>2</sub>O/CH<sub>2</sub>Cl<sub>2</sub>) to give a white solid (57.0 mg, 60%) whose spectroscopic data matched those reported previously.<sup>1</sup> m.p. 144–146 °C (Et<sub>2</sub>O);  $[\alpha]_D^{20.1} -204$  (*c* 1.00, CHCl<sub>3</sub>); Enantiomeric excess was determined by HPLC with a Chiralpak OD-H column (95:5 isohexane:*i*-PrOH, 0.8 mL/min, 254 nm, 23 °C):  $t_r$  (minor) = 18.8 min,  $t_r$  (major) = 22.7 min, 99% ee.

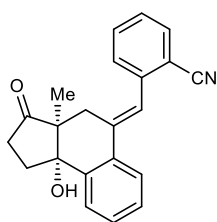

**2-[(E)-[(3aS,9bS)-9b-Hydroxy-3a-methyl-3-oxo-1,2,3,3a,4,9b-hexahydro-5H-cyclopenta[a]naphthalen-5-ylidene]methyl]benzonitrile (5e).**<sup>1</sup>

The title compound was prepared according to a modification of General Procedure B (in that the quantities of the rhodium precatalyst and ligand were increased) using [Rh(C<sub>2</sub>H<sub>4</sub>)<sub>2</sub>Cl]<sub>2</sub> (5.8 mg, 0.015 mmol), (*S*)-DTBM-SEGPHOS (**L2**, 35.4 mg, 0.03

mmol), alkynyl 1,3-diketone **4e** (75.3 mg, 0.30 mmol), and phenylboronic acid (54.9 mg, 0.45 mmol), and purified by column chromatography (10% Et<sub>2</sub>O/CH<sub>2</sub>Cl<sub>2</sub>) to give a white solid (63.0 mg, 64%) whose spectroscopic data matched those reported previously.<sup>1</sup> R<sub>f</sub> = 0.23 (10% Et<sub>2</sub>O/CH<sub>2</sub>Cl<sub>2</sub>); m.p. 153–155 °C (Et<sub>2</sub>O); [α]<sub>D</sub><sup>20.1</sup> –116 (*c* 1.00, CHCl<sub>3</sub>); Enantiomeric excess was determined by HPLC with a Chiralpak AD-H column (80:20 isohexane:*i*-PrOH, 0.8 mL/min, 254 nm, 23 °C): t<sub>r</sub> (minor) = 12.7 min, t<sub>r</sub> (major) = 29.6 min, 61% ee.

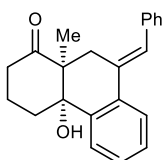

**(4aS,10aS)-9-[(E)-Benzylidene]-4a-hydroxy-10a-methyl-3,4,4a,9,10,10a-hexahydrophenanthren-1(2H)-one (5f).**<sup>1</sup>

The title compound was prepared according to General Procedure B using alkynyl 1,3-diketone **4f** (72.1 mg, 0.30 mmol)

and phenylboronic acid (54.9 mg, 0.45 mmol), and purified by column chromatography (10:8:1 petroleum ether/CH<sub>2</sub>Cl<sub>2</sub>/EtOAc) to give a pale yellow solid (57.6 mg, 60%) whose spectroscopic data matched those reported previously.<sup>1</sup> R<sub>f</sub> = 0.27 (5:4:1 petroleum ether/CH<sub>2</sub>Cl<sub>2</sub>/EtOAc); [α]<sub>D</sub><sup>20.8</sup> –96 (*c* 1.00, CH<sub>2</sub>Cl<sub>2</sub>); Enantiomeric excess was determined by HPLC with a Chiralpak IB-3 column (80:20 isohexane:*i*-PrOH, 1.0 mL/min, 230 nm, 23 °C): t<sub>r</sub> (minor) = 14.0 min, t<sub>r</sub> (major) = 15.5 min, 97% ee.

**(3aS,9bS)-5-[(E)-Benzylidene]-9b-hydroxy-3a,8-dimethyl-1,2,3a,4,5,9b-hexahydro-3H-cyclopenta[a]naphthalen-3-one (5g), (E)-2-methyl-2-[3-phenyl-3-(*p*-tolyl)allyl]cyclopentane-1,3-dione (6g), and (Z)-5-methyl-7-[phenyl(*p*-tolyl)methylene]cycloheptane-1,4-dione (7g)**

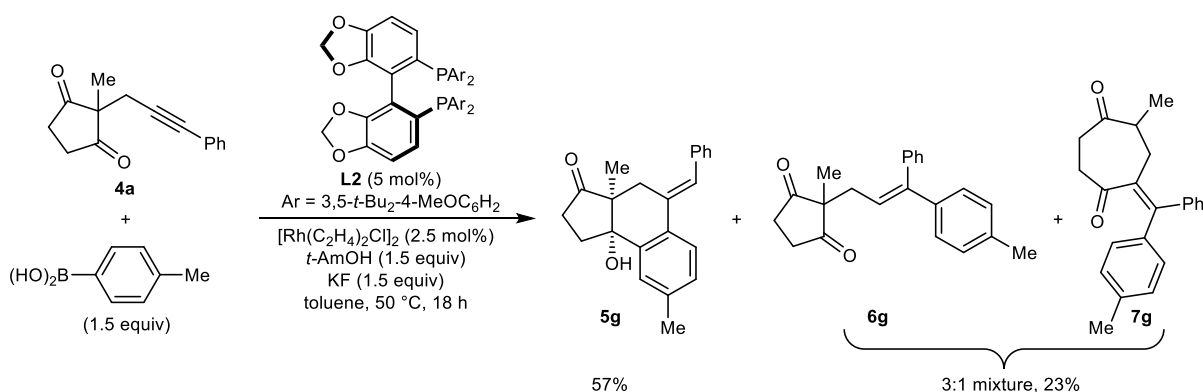

General Procedure B was followed using alkynyl 1,3-diketone **4a** (67.8 mg, 0.30 mmol) and 4-methylphenylboronic acid (61.2 mg, 0.45 mmol). Purification by column chromatography (20%

EtOAc/pentane) gave a 3:1 inseparable mixture of *products* **6g** and **7g** (22.7 mg, 23%) as a colorless oil followed by *arylativ* cyclization product **5g** as a yellow solid (54.5 mg, 57%).

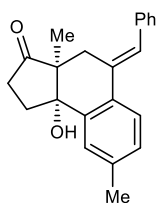

**(3aS,9bS)-5-[(E)-Benzylidene]-9b-hydroxy-3a,8-dimethyl-1,2,3a,4,5,9b-hexahydro-3H-cyclopenta[a]naphthalen-3-one (5g).**  $R_f = 0.25$  (30%

EtOAc/pentane); m.p. 152–154 °C (Et<sub>2</sub>O);  $[\alpha]_D^{20.1} -172$  (*c* 1.00, CHCl<sub>3</sub>); IR (ATR)

3414 (OH), 2922, 1720 (C=O), 1446, 1200, 1069, 841, 705 cm<sup>-1</sup>; <sup>1</sup>H NMR (400 MHz,

CDCl<sub>3</sub>)  $\delta$  7.58 (1H, d, *J* = 8.1 Hz, ArH), 7.52 (1H, s, ArH), 7.37–7.34 (2H, m, ArH and C=CH), 2.77

(1H, d, *J* = 14.1 Hz, CH<sub>a</sub>H<sub>b</sub>C=C), 2.68–2.57 (2H, m, CH<sub>a</sub>H<sub>b</sub>C=C and CH<sub>a</sub>H<sub>b</sub>C=O), 2.54–2.27 (3H,

m, CH<sub>a</sub>H<sub>b</sub>C=O and CH<sub>2</sub>COH), 2.42 (3H, s, ArCH<sub>3</sub>), 1.80 (1H, d, *J* = 2.2 Hz, OH), 1.00 (3H, s, 3H,

s, CH<sub>3</sub>CC=O); <sup>13</sup>C NMR (101 MHz, CDCl<sub>3</sub>)  $\delta$  220.0 (C), 139.9 (C), 138.8 (C), 137.2 (C), 132.0 (C),

131.5 (C), 129.14 (CH), 129.09 (2 × CH), 128.4 (2 × CH), 127.0 (CH), 126.9 (CH), 124.1 (CH), 80.1

(C), 54.2 (C), 35.9 (CH<sub>2</sub>), 35.2 (CH<sub>2</sub>), 34.3 (CH<sub>2</sub>), 21.3 (CH<sub>3</sub>), 13.8 (CH<sub>3</sub>); HRMS (ESI) Exact mass

calculated for C<sub>22</sub>H<sub>22</sub>NaO<sub>2</sub><sup>+</sup> [M+Na]<sup>+</sup> : 341.1517, found: 341.1506; Enantiomeric excess was

determined by HPLC with a Chiralpak AD-H column (80:20 isohexane:*i*-PrOH, 1.0 mL/min, 280

nm, 23 °C): *t<sub>r</sub>* (minor) = 7.0 min, *t<sub>r</sub>* (major) = 10.6 min, 99% ee.

Slow diffusion of pentane into a solution of **5g** in CH<sub>2</sub>Cl<sub>2</sub> gave crystals that were suitable for X-ray crystallography:

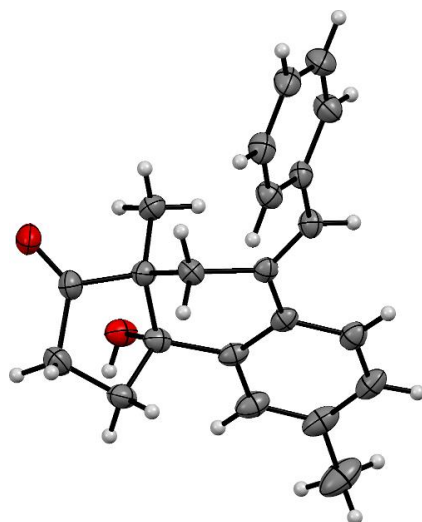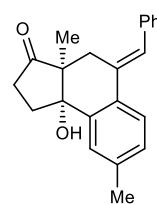

**5g**

CCDC 1959877

Flack parameter = 0.04(15)

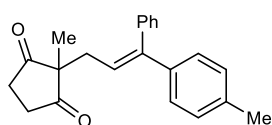

**(E)-2-Methyl-2-[3-phenyl-3-(*p*-tolyl)allyl]cyclopentane-1,3-dione (6g).**  $R_f$

= 0.28 (30% EtOAc/pentane); Characteristic NMR signals of **6g**: <sup>1</sup>H NMR

(400 MHz, CDCl<sub>3</sub>)  $\delta$  5.87 (1H, t, *J* = 7.6 Hz, =CH), 2.80–2.65 (4H, m,

CH<sub>2</sub>CH<sub>2</sub>), 2.43 (2H, d, *J* = 7.6 Hz, =CHCH<sub>2</sub>), 2.32 (3H, s, ArCH<sub>3</sub>), 1.12 (3H, s, CH<sub>3</sub>CCH<sub>2</sub>); <sup>13</sup>C

NMR (101 MHz, CDCl<sub>3</sub>)  $\delta$  215.5 (2 × C), 139.2 (C), 139.1 (C), 137.3 (C), 131.6 (C), 129.7 (2 × CH),



128.8 (2 × CH), 128.3 (2 × CH), 127.3 (CH), 127.2 (2 × CH), 120.3 (CH), 57.0 (C), 35.8 (CH<sub>2</sub>), 35.1 (2 × CH<sub>2</sub>), 21.1 (CH<sub>3</sub>), 17.1 (CH<sub>3</sub>).

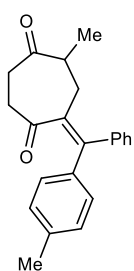

**(Z)-5-Methyl-7-[phenyl(*p*-tolyl)methylene]cycloheptane-1,4-dione (7g).**  $R_f = 0.28$  (30% EtOAc/pentane); Characteristic NMR signals of **7g**: <sup>1</sup>H NMR (400 MHz, CDCl<sub>3</sub>) δ 2.80–2.65 (6H, CH<sub>2</sub>CH<sub>2</sub> and CHCH<sub>2</sub>), 2.31 (3H, s, ArCH<sub>3</sub>), 2.28–2.19 (1H, m, CHCH<sub>3</sub>), 0.99 (3H, d,  $J = 6.4$  Hz, CHCH<sub>3</sub>); <sup>13</sup>C NMR (101 MHz, CDCl<sub>3</sub>) δ 211.7 (C), 207.8 (C), 144.7 (C), 140.1 (C), 45.3 (CH), 39.0 (CH<sub>2</sub>), 37.6 (CH<sub>2</sub>), 34.4 (CH<sub>2</sub>), 21.2 (CH<sub>3</sub>), 15.6 (CH<sub>3</sub>).

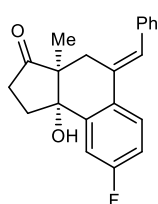

**(3*a*S,9*b*S)-5-[(*E*)-Benzylidene]-8-fluoro-9*b*-hydroxy-3*a*-methyl-1,2,3*a*,4,5,9*b*-hexahydro-3*H*-cyclopenta[*a*]naphthalen-3-one (5h).** The title compound was prepared according to a modification of General Procedure B (in that the quantities of the rhodium precatalyst and ligand were increased) using [Rh(C<sub>2</sub>H<sub>4</sub>)<sub>2</sub>Cl]<sub>2</sub> (5.8 mg, 0.015 mmol), (*S*)-DTBM-SEGPHOS (**L2**, 35.4 mg, 0.03 mmol), alkynyl 1,3-diketone **4a** (67.8 mg, 0.30 mmol), and 4-fluorophenylboronic acid (63.0 mg, 0.45 mmol), and purified by column chromatography (20% EtOAc/pentane) to give an off-white solid (63.4 mg, 65%).  $R_f = 0.42$  (40% EtOAc/pentane); m.p. 70–72 °C (Et<sub>2</sub>O);  $[\alpha]_D^{20.1} -200$  ( $c$  1.00, CHCl<sub>3</sub>); IR (ATR) 3447 (OH), 2966, 1729 (C=O), 1605, 1582, 1446, 1239, 838, 697 cm<sup>-1</sup>; <sup>1</sup>H NMR (400 MHz, CDCl<sub>3</sub>) δ 7.67 (1H, dd,  $J = 8.8, 5.5$  Hz, ArH), 7.43 (1H, dd,  $J = 9.6, 2.8$  Hz, ArH), 7.40–7.37 (2H, m, ArH), 7.31–7.25 (4H, m, ArH), 7.17 (1H, s, C=CH), 7.06 (1H, ddd,  $J = 8.8, 8.0, 2.8$  Hz, ArH), 2.80 (1H, d,  $J = 14.1$  Hz, CH<sub>a</sub>H<sub>b</sub>C=C), 2.68–2.58 (2H, m, CH<sub>a</sub>H<sub>b</sub>C=C and CH<sub>a</sub>H<sub>b</sub>C=O), 2.52 (1H, ddd,  $J = 19.1, 9.0, 2.5$  Hz, CH<sub>a</sub>H<sub>b</sub>C=O), 2.45–2.29 (2H, m, CH<sub>2</sub>COH), 1.84 (1H, d,  $J = 2.3$  Hz, OH), 1.02 (3H, s, CH<sub>3</sub>); <sup>13</sup>C NMR (101 MHz, CDCl<sub>3</sub>) δ 219.3 (C), 163.2 (C,  $J_{CF} = 248.0$  Hz), 142.4 (C,  $J_{CF} = 6.5$  Hz), 136.9 (C), 131.2 (C), 130.4 (C,  $J_{CF} = 3.6$  Hz), 129.1 (2 × CH), 128.5 (2 × CH), 127.7 (CH), 127.2 (CH), 126.3 (CH,  $J_{CF} = 8.1$  Hz), 115.6 (CH,  $J_{CF} = 21.8$  Hz), 113.1 (CH,  $J_{CF} = 22.0$  Hz), 80.0 (C), 54.0 (C), 35.8 (CH<sub>2</sub>), 35.0 (CH<sub>2</sub>), 34.4 (CH<sub>2</sub>), 13.7 (CH<sub>3</sub>); <sup>19</sup>F NMR (376 MHz, CDCl<sub>3</sub>) δ -113.2; HRMS (ESI) Exact mass calculated for C<sub>21</sub>F<sub>1</sub>H<sub>19</sub>NaO<sub>2</sub><sup>+</sup> [M+Na]<sup>+</sup>: 345.1261, found: 345.1259; Enantiomeric excess was determined by HPLC with a Chiralpak AD-H column (80:20 isohexane:*i*-PrOH, 1.0 mL/min, 254 nm, 23 °C):  $t_r$  (minor) = 6.5 min,  $t_r$  (major) = 10.5 min, 99% ee.

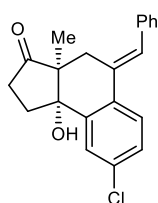

**(3*a*S,9*b*S)-5-[(*E*)-Benzylidene]-8-chloro-9*b*-hydroxy-3*a*-methyl-1,2,3*a*,4,5,9*b*-hexahydro-3*H*-cyclopenta[*a*]naphthalen-3-one (5i).**<sup>1</sup> The title compound was prepared according to General Procedure B using alkynyl 1,3-diketone **4a** (67.8 mg, 0.30 mmol) and 4-chlorophenylboronic acid (70.4 mg, 0.45 mmol), and purified by

column chromatography (20% EtOAc/pentane) to give an off-white solid (66.1 mg, 65%) whose spectroscopic data matched those reported previously.<sup>1</sup>  $R_f = 0.43$  (40% EtOAc/pentane); m.p. 78–80 °C (Et<sub>2</sub>O);  $[\alpha]_D^{20.1} -224$  ( $c$  1.00, CHCl<sub>3</sub>); Enantiomeric excess was determined by HPLC with a Chiralpak AD-H column (80:20 isohexane:*i*-PrOH, 1.0 mL/min, 280 nm, 23 °C):  $t_r$  (minor) = 6.9 min,  $t_r$  (major) = 12.3 min, 98% ee.

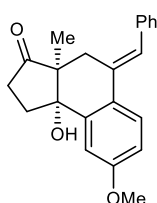

**(3a*S*,9b*S*)-5-[(*E*)-Benzylidene]-9b-hydroxy-8-methoxy-3a-methyl-1,2,3a,4,5,9b-hexahydro-3*H*-cyclopenta[*a*]naphthalen-3-one (5j).**<sup>1</sup> The title compound was prepared according to General Procedure B using alkynyl 1,3-diketone **4a** (67.8 mg, 0.30 mmol) and 4-methoxyphenylboronic acid (68.5 mg, 0.45 mmol), and purified by

column chromatography (10:8:1 petroleum ether/CH<sub>2</sub>Cl<sub>2</sub>/EtOAc) to give a pale yellow solid (55 mg, 55%) whose spectroscopic data matched those reported previously.<sup>1</sup> m.p. 166–168 °C;  $[\alpha]_D^{20.0} -188$  ( $c$  1.00, CH<sub>2</sub>Cl<sub>2</sub>); Enantiomeric excess was determined by HPLC with a Chiralpak IA-3 column (80:20 isohexane:*i*-PrOH, 1 mL/min, 230 nm, 23 °C):  $t_r$  (minor) = 16.0 min,  $t_r$  (major) = 21.3 min, 99% ee.

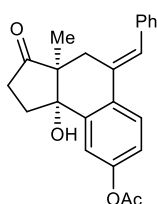

**(3a*S*,9b*S*)-5-[(*E*)-Benzylidene]-9b-hydroxy-3a-methyl-3-oxo-2,3,3a,4,5,9b-hexahydro-1*H*-cyclopenta[*a*]naphthalen-8-yl acetate (5k).** The title compound was prepared according to a modification of General Procedure B (in that the quantities of the rhodium precatalyst, ligand, and boronic acid were increased) using

[Rh(C<sub>2</sub>H<sub>4</sub>)<sub>2</sub>Cl]<sub>2</sub> (5.8 mg, 0.015 mmol), (*S*)-DTBM-SEGPHOS (**L2**, 35.4 mg, 0.03 mmol), alkynyl 1,3-diketone **4a** (67.8 mg, 0.30 mmol), and 4-acetoxyphenylboronic acid (108 mg, 0.60 mmol), and purified by column chromatography (10% Et<sub>2</sub>O/CH<sub>2</sub>Cl<sub>2</sub>) to give a yellow solid (66.0 mg, 61%).  $R_f = 0.30$  (10% Et<sub>2</sub>O/CH<sub>2</sub>Cl<sub>2</sub>); m.p. 95–97 °C (Et<sub>2</sub>O);  $[\alpha]_D^{20.1} -208$  ( $c$  1.00, CHCl<sub>3</sub>); IR (ATR) 3466 (OH), 2955, 1735 (C=O), 1493, 1368, 1200, 815, 698 cm<sup>-1</sup>; <sup>1</sup>H NMR (400 MHz, CDCl<sub>3</sub>)  $\delta$  7.69 (1H, d,  $J = 8.7$  Hz, ArH), 7.44 (1H, d,  $J = 2.5$  Hz, ArH), 7.38–7.35 (2H, m, ArH), 7.29–7.25 (3H, m, ArH), 7.19 (1H, app d,  $J = 2.1$  Hz, C=CH), 7.08 (1H, dd,  $J = 8.6, 2.5$  Hz, ArH), 2.79 (1H, d,  $J = 14.2$  Hz, CH<sub>a</sub>H<sub>b</sub>C=), 2.67–2.57 (2H, m, CH<sub>a</sub>H<sub>b</sub>C= and CH<sub>a</sub>H<sub>b</sub>C=O), 2.50 (1H, ddd,  $J = 19.1, 8.8, 2.6$  Hz, CH<sub>a</sub>H<sub>b</sub>C=O), 2.42–2.29 (2H, m, CH<sub>2</sub>COH), 2.35 (3H, s, CH<sub>3</sub>C=O), 1.86 (1H, d,  $J = 2.3$  Hz, OH), 1.00 (3H, s, CH<sub>3</sub>CC=O); <sup>13</sup>C NMR (101 MHz, CDCl<sub>3</sub>)  $\delta$  219.4 (C), 169.5 (C), 151.1 (C), 141.6 (C), 136.9 (C), 132.0 (C), 131.3 (C), 129.1 (2 × CH), 128.4 (2 × CH), 128.1 (CH), 127.2 (CH), 125.5 (CH), 121.7 (CH), 119.5 (CH), 80.0 (C), 54.0 (C), 35.8 (CH<sub>2</sub>), 35.1 (CH<sub>2</sub>), 34.4 (CH<sub>2</sub>), 21.1 (CH<sub>3</sub>), 13.7 (CH<sub>3</sub>); HRMS (ESI) Exact mass calculated for C<sub>23</sub>H<sub>22</sub>NaO<sub>4</sub><sup>+</sup> [M+Na]<sup>+</sup>: 385.1410, found:

385.1411; Enantiomeric excess was determined by HPLC with a Chiralpak AD-H column (80:20 isohexane:*i*-PrOH, 1.0 mL/min, 280 nm, 23 °C):  $t_r$  (minor) = 8.2 min,  $t_r$  (major) = 10.6 min, 99% ee.

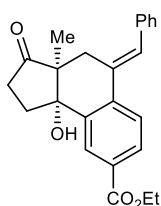

**Ethyl (3a*S*,9b*S*)-5-[(*E*)-benzylidene]-9b-hydroxy-3a-methyl-3-oxo-2,3,3a,4,5,9b-hexahydro-1*H*-cyclopenta[*a*]naphthalene-8-carboxylate (5l).**<sup>1</sup> The title compound

was prepared according to a modification of General Procedure B (in that the quantities of the rhodium precatalyst, ligand, and boronic acid were increased) using [Rh(C<sub>2</sub>H<sub>4</sub>)<sub>2</sub>Cl]<sub>2</sub> (5.8 mg, 0.015 mmol), (*S*)-DTBM-SEGPHOS (**L2**, 35.4 mg, 0.03 mmol), alkynyl 1,3-diketone **4a** (67.8 mg, 0.30 mmol), and 4-ethoxycarbonylphenylboronic acid (140 mg, 0.72 mmol), and purified by column chromatography (10% Et<sub>2</sub>O/CH<sub>2</sub>Cl<sub>2</sub>) to give a yellow oily solid (73.4 mg, 65%) whose spectroscopic data matched those reported previously.<sup>1</sup> [ $\alpha$ ]<sub>D</sub><sup>20.1</sup> –180 (*c* 1.00, CHCl<sub>3</sub>); Enantiomeric excess was determined by HPLC with a Chiralpak OD-H column (90:10 isohexane:*i*-PrOH, 1.0 mL/min, 280 nm, 23 °C):  $t_r$  (minor) = 20.9 min,  $t_r$  (major) = 24.6 min, 99% ee.

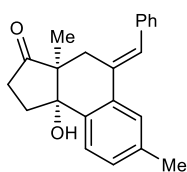

**(3a*S*,9b*S*)-5-[(*E*)-Benzylidene]-9b-hydroxy-3a,7-dimethyl-1,2,3a,4,5,9b-hexahydro-3*H*-cyclopenta[*a*]naphthalen-3-one (5m).**<sup>1</sup> The title compound was

prepared according to General Procedure B using alkynyl 1,3-diketone **4a** (67.8 mg, 0.30 mmol) and 3-methylphenylboronic acid (61.2 mg, 0.45 mmol), and purified by column chromatography (20% EtOAc/pentane) to give a white solid (42.4 mg, 44%) whose spectroscopic data matched those reported previously.<sup>1</sup> m.p. 142–143 °C (Et<sub>2</sub>O); [ $\alpha$ ]<sub>D</sub><sup>20.1</sup> –180 (*c* 1.00, CHCl<sub>3</sub>); Enantiomeric excess was determined by HPLC with a Chiralpak AD-H column (80:20 isohexane:*i*-PrOH, 1.0 mL/min, 280 nm, 23 °C):  $t_r$  (minor) = 7.3 min,  $t_r$  (major) = 10.4 min, 99% ee.

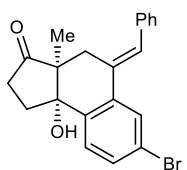

**(3a*S*,9b*S*)-5-[(*E*)-Benzylidene]-7-bromo-9b-hydroxy-3a-methyl-1,2,3a,4,5,9b-hexahydro-3*H*-cyclopenta[*a*]naphthalen-3-one (5n).**<sup>1</sup> The title compound was

prepared according to General Procedure B using alkynyl 1,3-diketone **4a** (67.8 mg, 0.30 mmol) and 3-bromophenylboronic acid (90.5 mg, 0.45 mmol), and purified by column chromatography (10:8:1 petroleum ether/CH<sub>2</sub>Cl<sub>2</sub>/EtOAc) to give a white solid (71 mg, 61%) whose spectroscopic data matched those reported previously.<sup>1</sup> m.p. 173–174 °C (MeOH); [ $\alpha$ ]<sub>D</sub><sup>20.4</sup> –60 (*c* 1.00, CH<sub>2</sub>Cl<sub>2</sub>); Enantiomeric excess was determined by HPLC with a Chiralpak IA-3 column (80:20 isohexane:*i*-PrOH, 0.8 mL/min, 230 nm, 23 °C):  $t_r$  (minor) = 16.1 min,  $t_r$  (major) = 18.0 min, 99% ee.

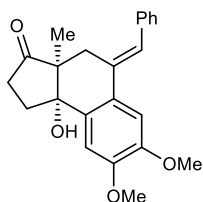

**(3a*S*,9b*S*)-5-[(*E*)-Benzylidene]-9b-hydroxy-7,8-dimethoxy-3a-methyl-1,2,3a,4,5,9b-hexahydro-3*H*-cyclopenta[*a*]naphthalen-3-one (5o).**

The title compound was prepared according to a modification of General Procedure B (in that the quantities of the rhodium precatalyst, ligand, and boronic acid were increased) using  $[\text{Rh}(\text{C}_2\text{H}_4)_2\text{Cl}]_2$  (5.8 mg, 0.015 mmol), (*S*)-DTBM-SEGPHOS (**L2**, 35.4 mg, 0.03 mmol), alkynyl 1,3-diketone **4a** (67.8 mg, 0.30 mmol), and 3,4-dimethoxyphenylboronic acid (96.1 mg, 0.60 mmol), and purified by column chromatography (10% Et<sub>2</sub>O/CH<sub>2</sub>Cl<sub>2</sub>) to give a yellow solid (50.7 mg, 46%).  $R_f = 0.33$  (10% Et<sub>2</sub>O/CH<sub>2</sub>Cl<sub>2</sub>); m.p. 91–93 °C (Et<sub>2</sub>O);  $[\alpha]_D^{20.1} -164$  (*c* 1.00, CHCl<sub>3</sub>); IR (ATR) 3467 (OH), 2959, 2835, 1731 (C=O), 1446, 1200, 1052, 845, 698 cm<sup>-1</sup>; <sup>1</sup>H NMR (400 MHz, CDCl<sub>3</sub>)  $\delta$  7.40–7.35 (2H, m, ArH), 7.30–7.26 (3H, m, ArH), 7.21 (1H, s, ArH), 7.14 (1H, s, ArH), 7.12 (1H, app d, *J* = 2.0 Hz, C=CH), 3.98 (6H, s, 2 × OCH<sub>3</sub>), 2.77 (1H, d, *J* = 14.0 Hz, CH<sub>a</sub>H<sub>b</sub>C=), 2.68–2.57 (2H, m, CH<sub>a</sub>H<sub>b</sub>C= and CH<sub>a</sub>H<sub>b</sub>C=O), 2.54–2.29 (3H, m, CH<sub>a</sub>H<sub>b</sub>C=O and CH<sub>2</sub>COH), 1.79 (1H, d, *J* = 2.2 Hz, OH), 1.02 (3H, s, CH<sub>3</sub>CC=O); <sup>13</sup>C NMR (101 MHz, CDCl<sub>3</sub>)  $\delta$  219.8 (C), 150.1 (C), 149.0 (C), 137.2 (C), 132.9 (C), 132.0 (C), 129.1 (2 × CH), 128.4 (2 × CH), 126.9 (CH), 126.1 (CH), 108.6 (CH), 106.5 (CH), 80.1 (C), 56.05 (CH<sub>3</sub>), 55.98 (CH<sub>3</sub>), 54.2 (C), 35.7 (CH<sub>2</sub>), 35.3 (CH<sub>2</sub>), 34.5 (CH<sub>2</sub>), 13.9 (CH<sub>3</sub>); HRMS (ESI) Exact mass calculated for C<sub>23</sub>H<sub>24</sub>NaO<sub>4</sub><sup>+</sup> [M+Na]<sup>+</sup>: 387.1567, found: 387.1573; Enantiomeric excess was determined by HPLC with a Chiralpak OD-H column (85:15 isohexane:*i*-PrOH, 0.3 mL/min, 210 nm, 23 °C): *t*<sub>r</sub> (minor) = 40.9 min, *t*<sub>r</sub> (major) = 42.4 min, 99% ee.

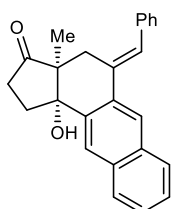

**(3a*S*,11b*S*)-5-[(*E*)-Benzylidene]-11b-hydroxy-3a-methyl-1,2,3a,4,5,11b-hexahydro-3*H*-cyclopenta[*a*]anthracen-3-one (5p).**<sup>1</sup>

The title compound was prepared according to General Procedure B using alkynyl 1,3-diketone **4a** (67.8 mg, 0.30 mmol) and 2-naphthylboronic acid (77.4 mg, 0.45 mmol), and purified by column chromatography (20% EtOAc/pentane) to give a white solid (66.0 mg, 64%) whose spectroscopic data matched those reported previously.<sup>1</sup> m.p. 179–180 °C (Et<sub>2</sub>O);  $[\alpha]_D^{20.1} -212$  (*c* 1.00, CHCl<sub>3</sub>); Enantiomeric excess was determined by HPLC with a Chiralpak OD-H column (95:5 isohexane:*i*-PrOH, 1.0 mL/min, 210 nm, 23 °C): *t*<sub>r</sub> (minor) = 30.8 min, *t*<sub>r</sub> (major) = 33.7 min, 95% ee.

**(5a*S*,8a*R*)-4-[(*E*)-Benzylidene]-8a-hydroxy-5a-methyl-4,5,5a,7,8,8a-hexahydro-6*H*-indeno[4,5-*c*]thiophen-6-one (5ra) and (5a*S*,8a*R*)-4-[(*E*)-benzylidene]-8a-hydroxy-5a-methyl-4,5,5a,7,8,8a-hexahydro-6*H*-indeno[4,5-*b*]thiophen-6-one (5rb)**

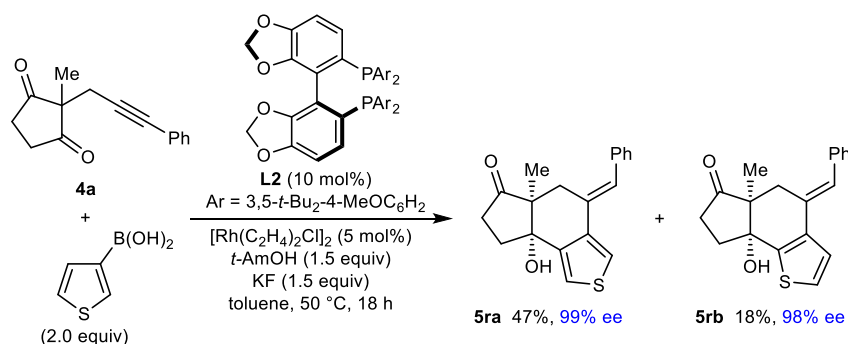

A modification of General Procedure B (in that the quantities of the rhodium precatalyst, ligand, and boronic acid were increased) was followed using  $[\text{Rh}(\text{C}_2\text{H}_4)_2\text{Cl}]_2$  (5.8 mg, 0.015 mmol), (*S*)-DTBM-SEGPHOS (**L2**, 35.4 mg, 0.03 mmol), alkynyl 1,3-diketone **4a** (67.8 mg, 0.30 mmol) and 3-thienylboronic acid (76.8 mg, 0.60 mmol), and purified by column chromatography (10%  $\text{Et}_2\text{O}/\text{CH}_2\text{Cl}_2$ ) to give *arylate cyclizaton product* **5ra** (43.5 mg, 47%) as a yellow solid followed by *arylate cyclizaton product* **5rb** (16.7 mg, 18%) as a yellow solid.

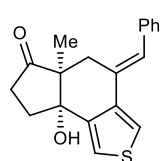

**(5a*S*,8a*R*)-4-[(*E*)-Benzylidene]-8a-hydroxy-5a-methyl-4,5,5a,7,8,8a-hexahydro-6*H*-indeno[4,5-*c*]thiophen-6-one (5ra).**  $R_f = 0.19$  (10%  $\text{Et}_2\text{O}/\text{CH}_2\text{Cl}_2$ ); m.p. 126–

128 °C ( $\text{Et}_2\text{O}$ );  $[\alpha]_{\text{D}}^{20.1} -196$  (*c* 1.00,  $\text{CHCl}_3$ ); IR (ATR) 3434 (OH), 2958, 2924, 2852, 1730, 1442, 1050, 962, 792, 696  $\text{cm}^{-1}$ ;  $^1\text{H}$  NMR (400 MHz,  $\text{CDCl}_3$ )  $\delta$  7.50 (1H, d,  $J = 3.1$  Hz, ArH), 7.48 (1H, d,  $J = 3.1$  Hz, ArH), 7.38–7.35 (2H, m, ArH), 7.29–7.27 (3H, m, ArH), 7.16 (1H, app d,  $J = 2.3$  Hz, C=CH), 2.75 (1H, dd,  $J = 14.8, 1.0$  Hz,  $\text{CH}_a\text{H}_b\text{C}=\text{C}$ ), 2.68–2.56 (2H, m,  $\text{CH}_a\text{H}_b\text{C}=\text{C}$  and  $\text{CH}_a\text{H}_b\text{C}=\text{O}$ ), 2.52–2.36 (3H, m,  $\text{CH}_a\text{H}_b\text{C}=\text{O}$  and  $\text{CH}_2\text{COH}$ ), 1.90 (1H, d,  $J = 2.0$  Hz, OH), 0.99 (3H, s,  $\text{CH}_3$ );  $^{13}\text{C}$  NMR (101 MHz,  $\text{CDCl}_3$ )  $\delta$  219.2 (C), 142.9 (C), 137.5 (C), 136.6 (C), 129.1 (2 × CH), 128.4 (2 × CH), 127.0 (CH), 126.5 (CH), 122.3 (CH), 118.5 (CH), 79.4 (C), 55.1 (C), 35.3 ( $\text{CH}_2$ ), 35.0 ( $\text{CH}_2$ ), 34.8 ( $\text{CH}_2$ ), 13.7 ( $\text{CH}_3$ ); HRMS (ESI) Exact mass calculated for  $\text{C}_{19}\text{H}_{18}\text{NaO}_2\text{S}^+$   $[\text{M}+\text{Na}]^+$ : 333.0920, found: 333.0920; Enantiomeric excess was determined by HPLC with a Chiralpak OD-H column (90:10 isohexane:*i*-PrOH, 1.0 mL/min, 230 nm, 23 °C):  $t_r$  (major) = 12.5 min,  $t_r$  (minor) = 14.1 min, 99% ee.

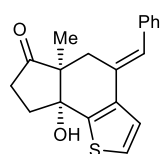

**(5a*S*,8a*R*)-4-[(*E*)-Benzylidene]-8a-hydroxy-5a-methyl-4,5,5a,7,8,8a-hexahydro-6*H*-indeno[4,5-*b*]thiophen-6-one (5rb).**  $R_f = 0.14$  (10%  $\text{Et}_2\text{O}/\text{CH}_2\text{Cl}_2$ ); m.p. 157–

159 °C ( $\text{Et}_2\text{O}$ );  $[\alpha]_{\text{D}}^{20.1} -8.0$  (*c* 0.20,  $\text{CHCl}_3$ ); IR (ATR) 3362 (OH), 2948, 2928, 1721 (C=O), 1395, 1126, 1073, 755, 698  $\text{cm}^{-1}$ ;  $^1\text{H}$  NMR (400 MHz,  $\text{CDCl}_3$ )  $\delta$  7.41–7.28 (6H, m, ArH),

7.24 (1H, d,  $J = 5.3$  Hz, ArH), 7.01 (1H, s, C=CH), 2.92 (dd,  $J = 15.2, 1.9$  Hz, CH<sub>a</sub>H<sub>b</sub>C=), 2.63 (1H, dd,  $J = 15.2, 1.6$  Hz, CH<sub>a</sub>H<sub>b</sub>C=), 2.59–2.41 (3H, m, CH<sub>2</sub>C=O and CH<sub>a</sub>H<sub>b</sub>COH), 2.35–2.25 (1H, m, CH<sub>a</sub>H<sub>b</sub>COH), 2.09 (1H, br s, OH), 1.10 (3H, s, CH<sub>3</sub>); <sup>13</sup>C NMR (101 MHz, CDCl<sub>3</sub>) δ 217.9 (C), 141.9 (C), 138.1 (C), 136.7 (C), 129.1 (2 × CH), 129.0 (C), 128.4 (2 × CH), 127.0 (CH), 126.3 (CH), 125.9 (CH), 123.4 (CH), 78.2 (C), 54.9 (C), 35.8 (CH<sub>2</sub>), 35.2 (CH<sub>2</sub>), 33.2 (CH<sub>2</sub>), 15.8 (CH<sub>3</sub>); HRMS (ESI) Exact mass calculated for C<sub>19</sub>H<sub>18</sub>NaO<sub>2</sub>S<sup>+</sup> [M+Na]<sup>+</sup>: 333.0920, found: 333.0927; Enantiomeric excess was determined by HPLC with a Chiralpak OD-H column (95:5 isohexane:*i*-PrOH, 1.0 mL/min, 280 nm, 23 °C):  $t_r$  (major) = 23.0 min,  $t_r$  (minor) = 29.2 min, 98% ee.

The structural similarity of the two products **5ra** and **5rb** make confirmation of their exact structure challenging. However, in the major product **5ra**, the coupling constant observed between the two thiophene protons are indicative of a thiophene 2,5-relationship ( $^3J = 3.1$  Hz vs expected range 0–4 Hz), whereas in the minor product **5rb**, the coupling constant observed between the two thiophene protons are indicative of a thiophene 2,3-relationship ( $^2J = 5.3$  Hz vs expected range 4–8 Hz).

#### (*E*)-4-Benzylidene-1-methyl-1,2,3,4-tetrahydronaphthalen-1-ol (**7**)

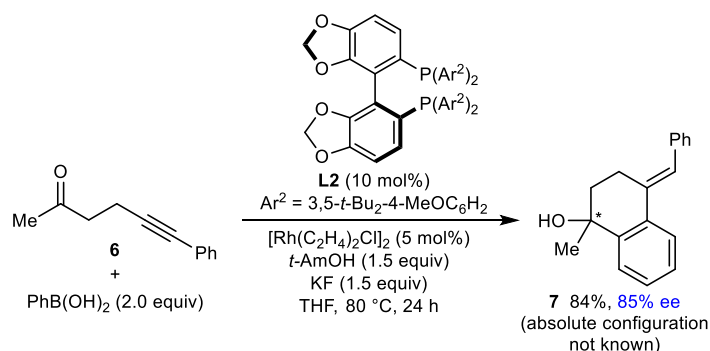

The title compound was prepared according to General Procedure A using alkynyl diketone **6** (51.6 mg, 0.30 mmol) and phenylboronic acid (73.2 mg, 0.60 mmol), and purified by column chromatography (5% to 10% EtOAc/pentane) to give an orange oil (62.8 mg, 84%).  $R_f = 0.30$  (30% EtOAc/pentane);  $[\alpha]_D^{25.0} -20.0$  ( $c$  1.00, CHCl<sub>3</sub>); IR (ATR) 3303 (OH), 3027, 2941, 2851, 1596, 1443, 1030, 922, 780, 695 cm<sup>-1</sup>; <sup>1</sup>H NMR (500 MHz, CDCl<sub>3</sub>) δ 7.68 (2H, ddd,  $J = 9.7, 7.7, 1.5$  Hz, ArH), 7.41–7.39 (4H, m, ArH), 7.36–7.25 (3H, m, ArH), 7.06 (1H, t,  $J = 1.7$  Hz, C=CH), 3.01 (1H, dddd,  $J = 15.3, 6.5, 4.8, 1.7$  Hz, =CCH<sub>a</sub>H<sub>b</sub>), 2.81 (1H, dddd,  $J = 15.3, 10.3, 4.8, 2.0$  Hz, =CCH<sub>a</sub>H<sub>b</sub>), 2.04 (1H, ddd,  $J = 12.9, 6.1, 1.4$  Hz, HOCCH<sub>a</sub>H<sub>b</sub>), 1.95 (1H, ddd,  $J = 12.9, 10.2, 4.8$  Hz, HOCCH<sub>a</sub>H<sub>b</sub>), 1.79 (1H, br s, OH), 1.57 (3H, s, CH<sub>3</sub>); <sup>13</sup>C NMR (126 MHz, CDCl<sub>3</sub>) δ 143.3 (C), 137.8 (C), 136.4 (C), 135.2 (C), 129.3 (2 × CH), 128.2 (2 × CH), 128.1 (CH), 127.6 (CH), 126.7 (CH), 125.3 (CH), 124.9 (CH), 124.4 (CH), 70.8 (C), 39.2 (CH<sub>2</sub>), 29.5 (CH<sub>3</sub>), 25.3 (CH<sub>2</sub>); HRMS (ESI) Exact mass calculated for [C<sub>18</sub>H<sub>18</sub>NaO]<sup>+</sup> [M+Na]<sup>+</sup>: 273.1250, found 273.1246; Enantiomeric excess was

determined by HPLC with a Chiralpak AS-H column (90:10 isohexane:*i*-PrOH, 0.5 mL/min, 280 nm, 25 °C):  $t_r$  (minor) = 14.0 min,  $t_r$  (major) = 15.0 min, 85% ee.

## NMR Spectra of New Compounds

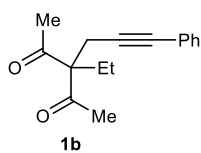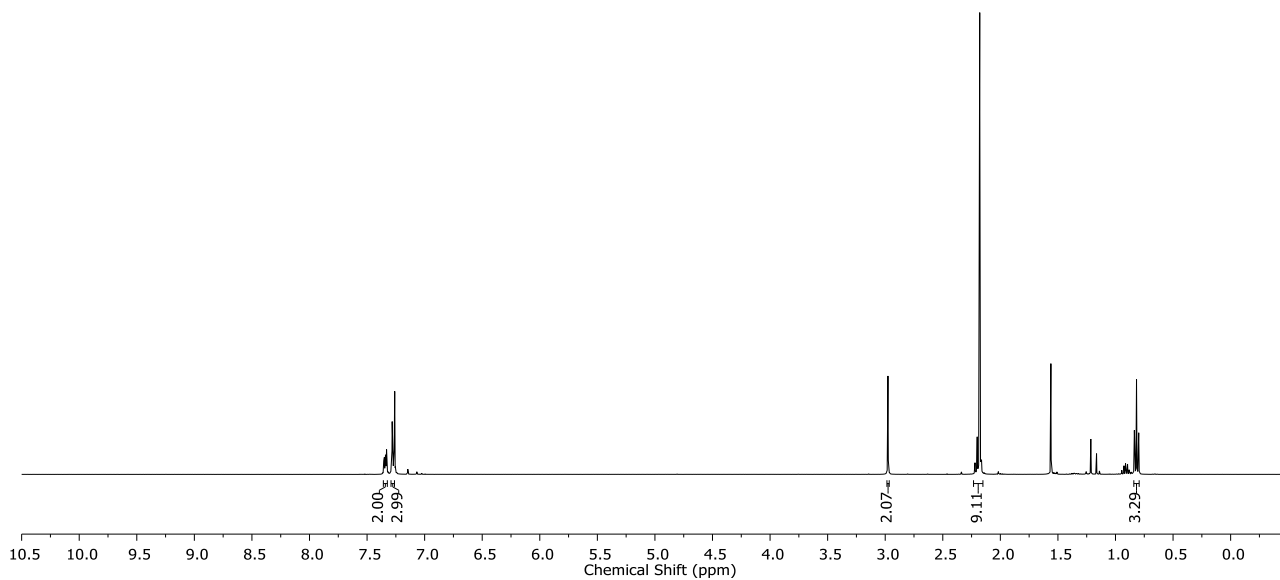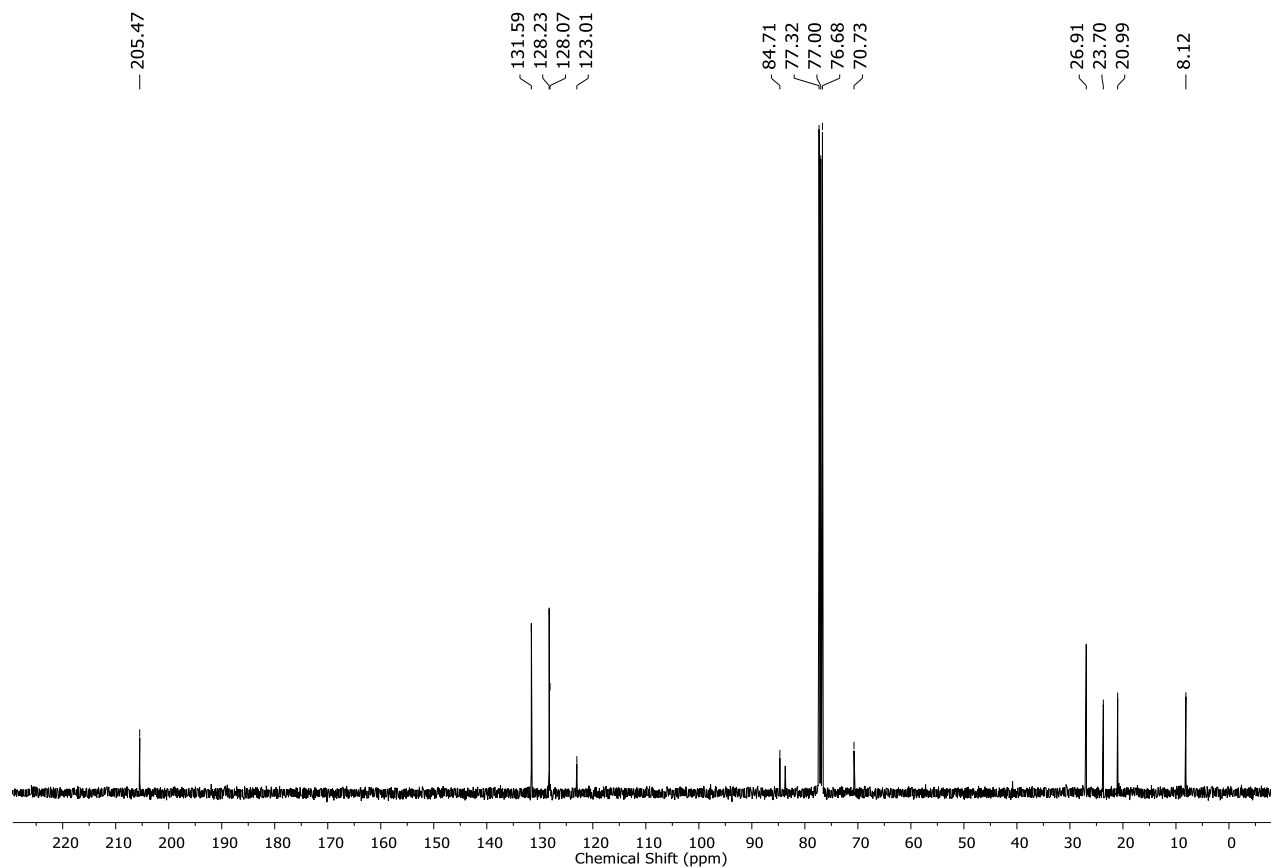



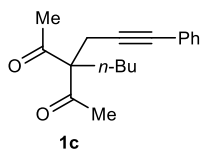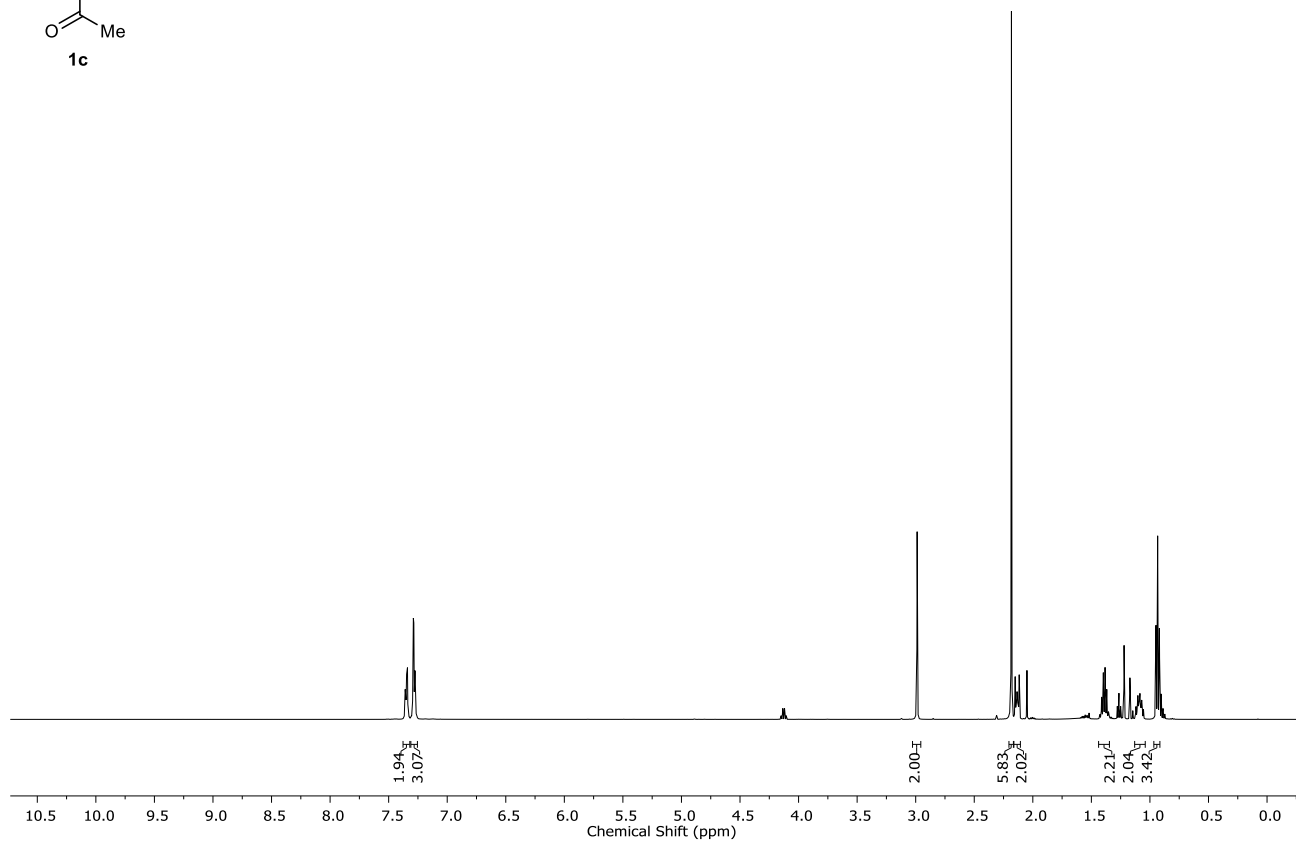

— 205.49

131.56  
128.21  
128.04  
123.02

84.76  
83.74  
77.25  
77.00  
76.75  
70.35

30.48  
26.86  
25.88  
23.10  
21.57  
13.82

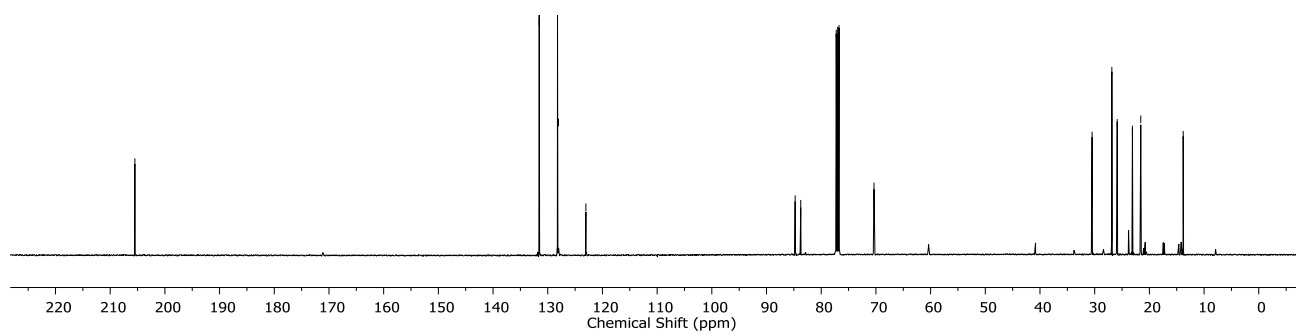

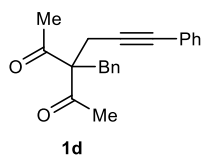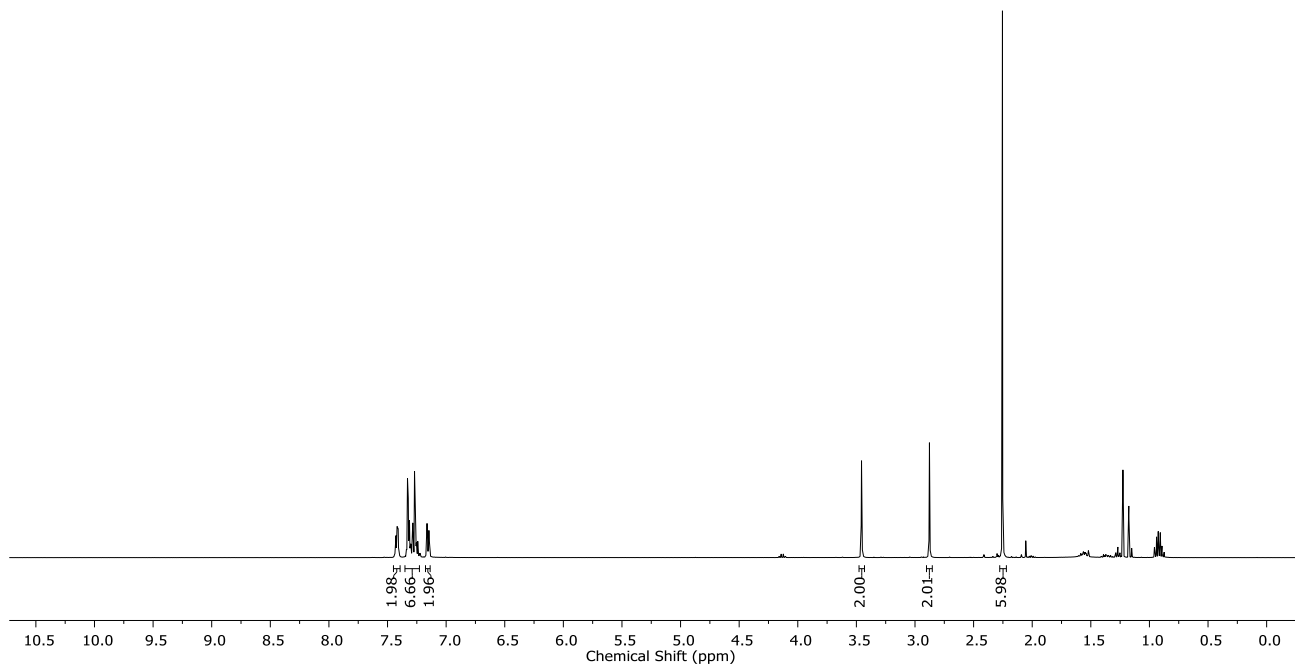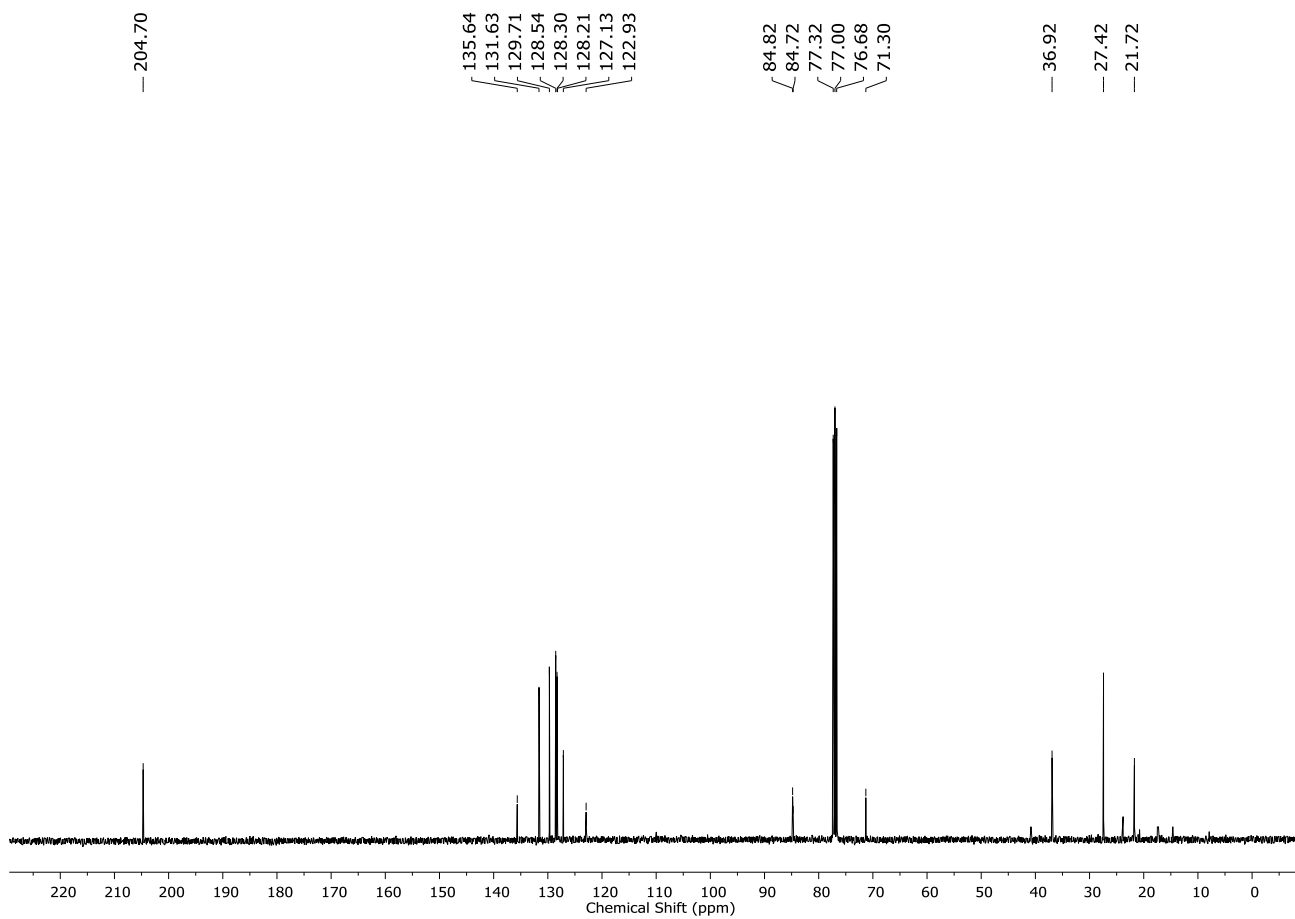

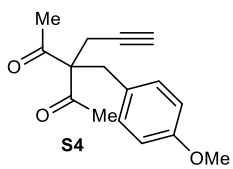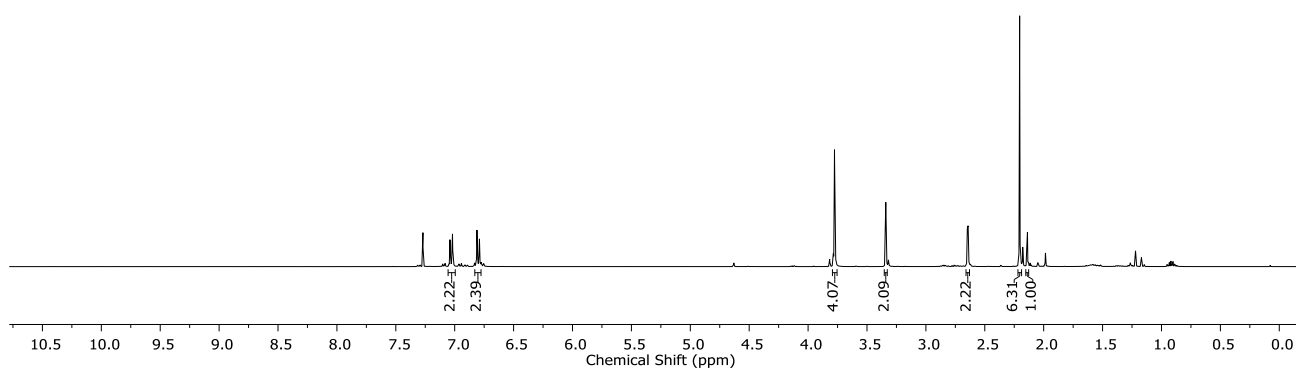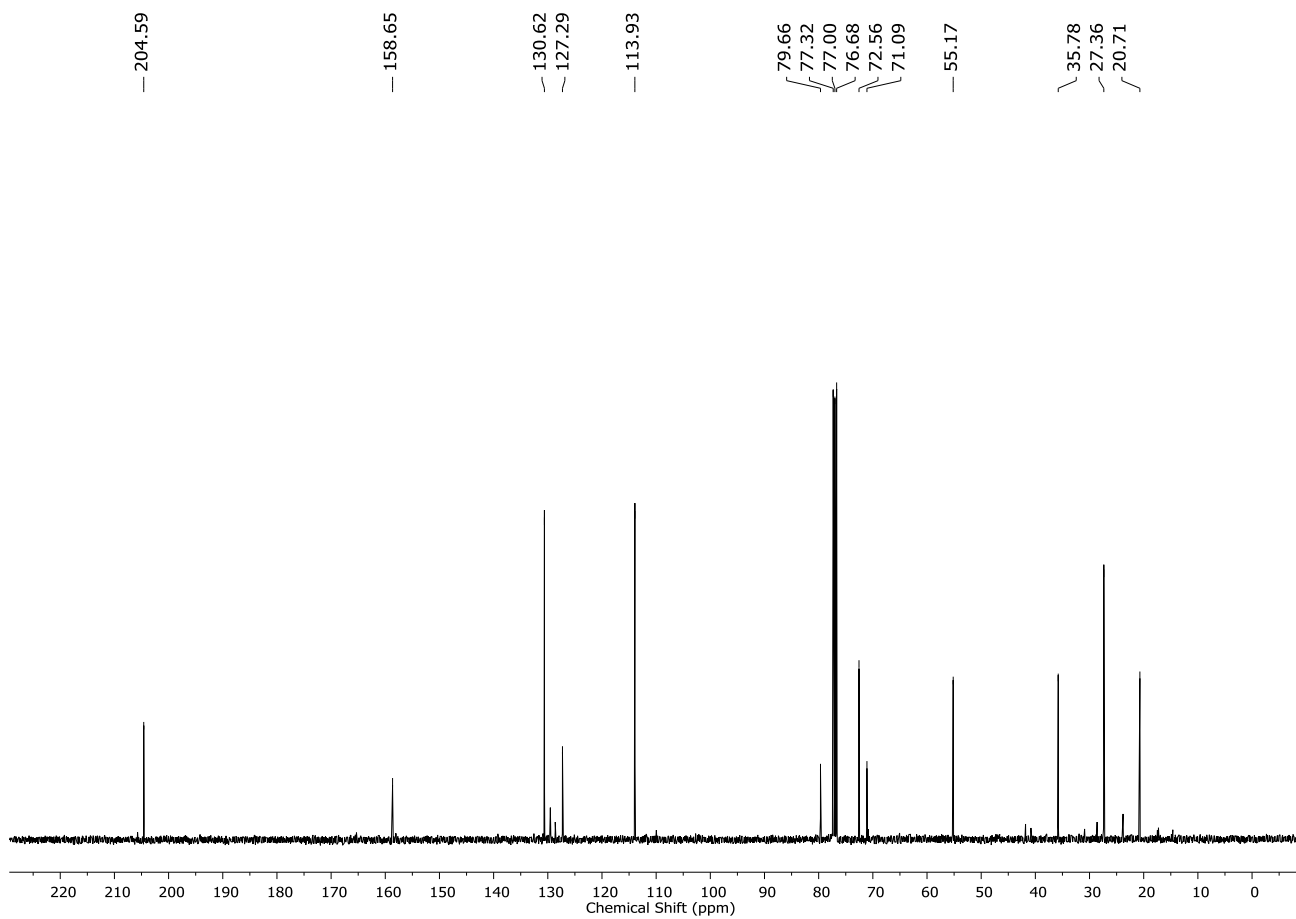

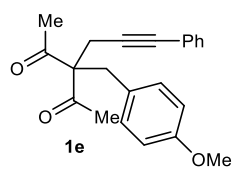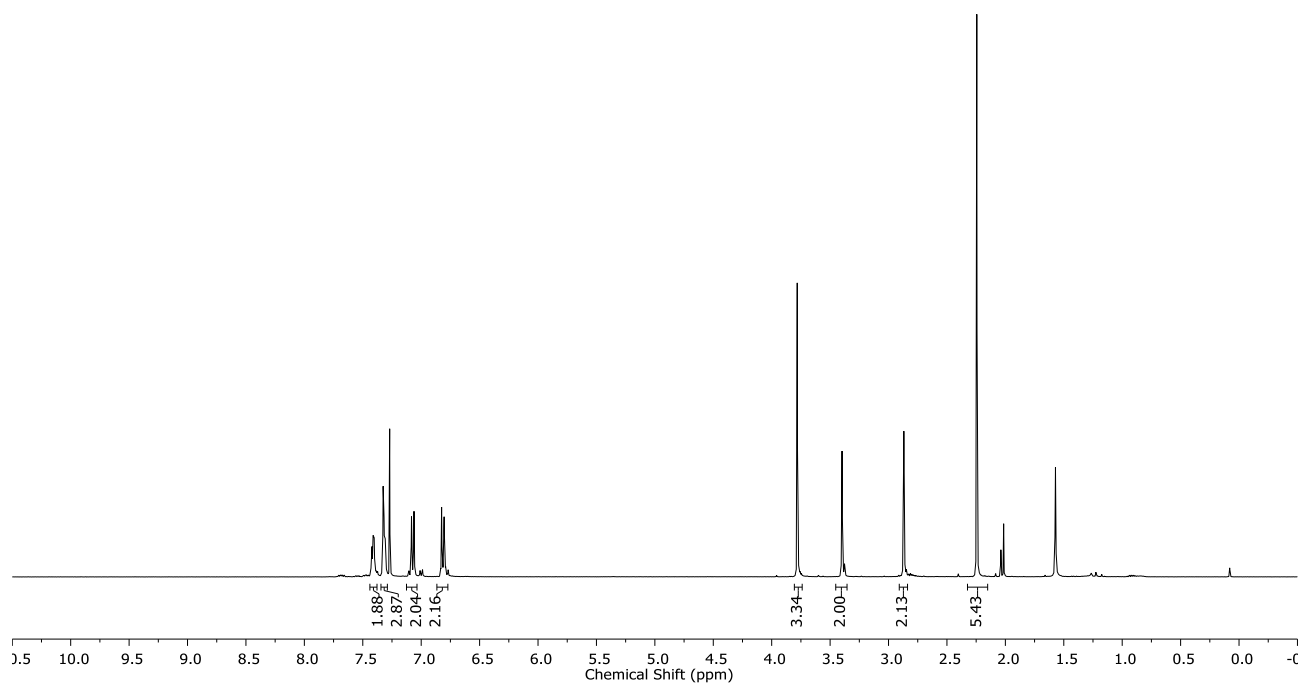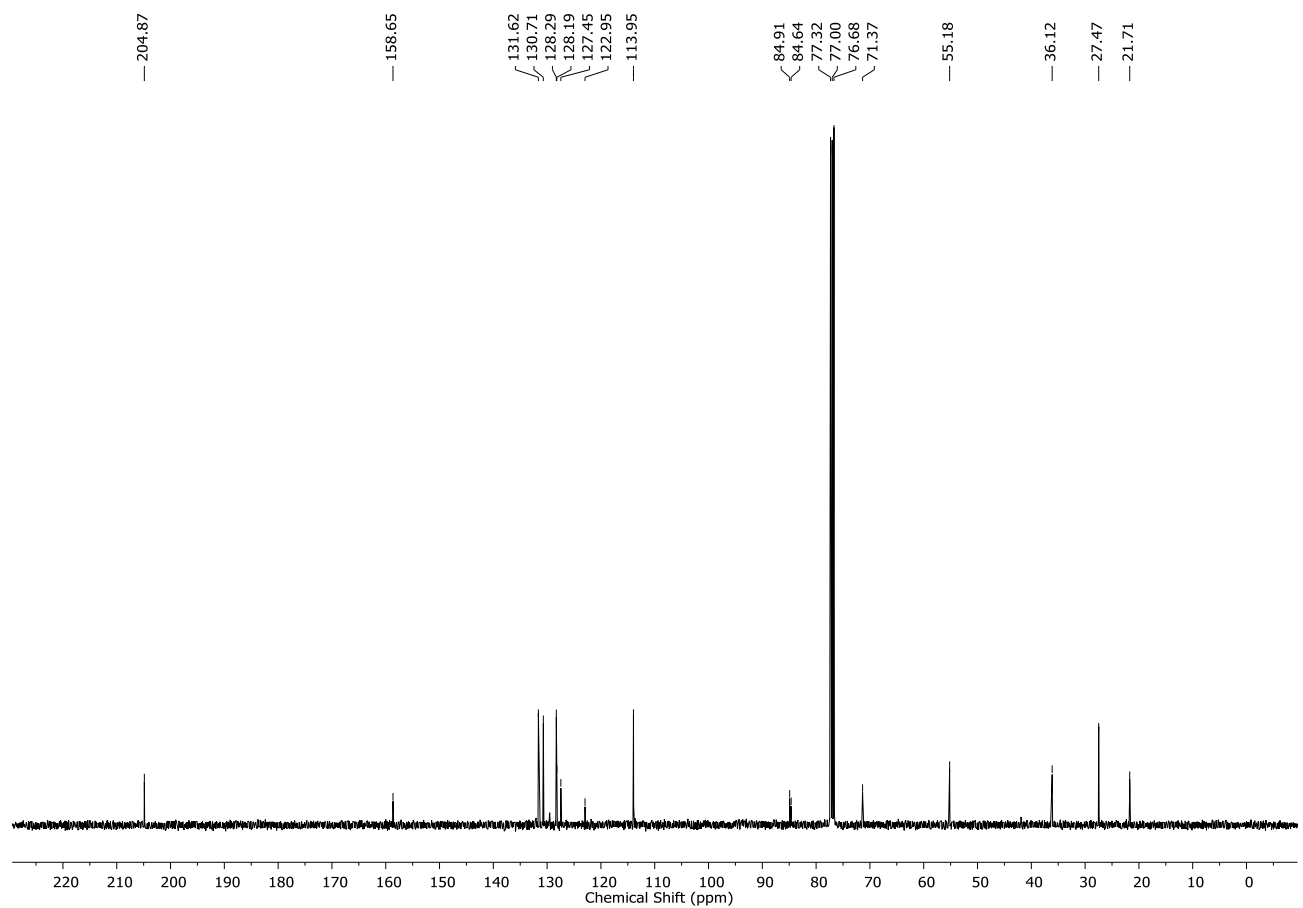

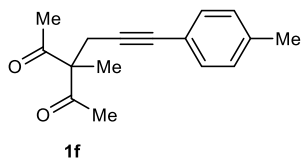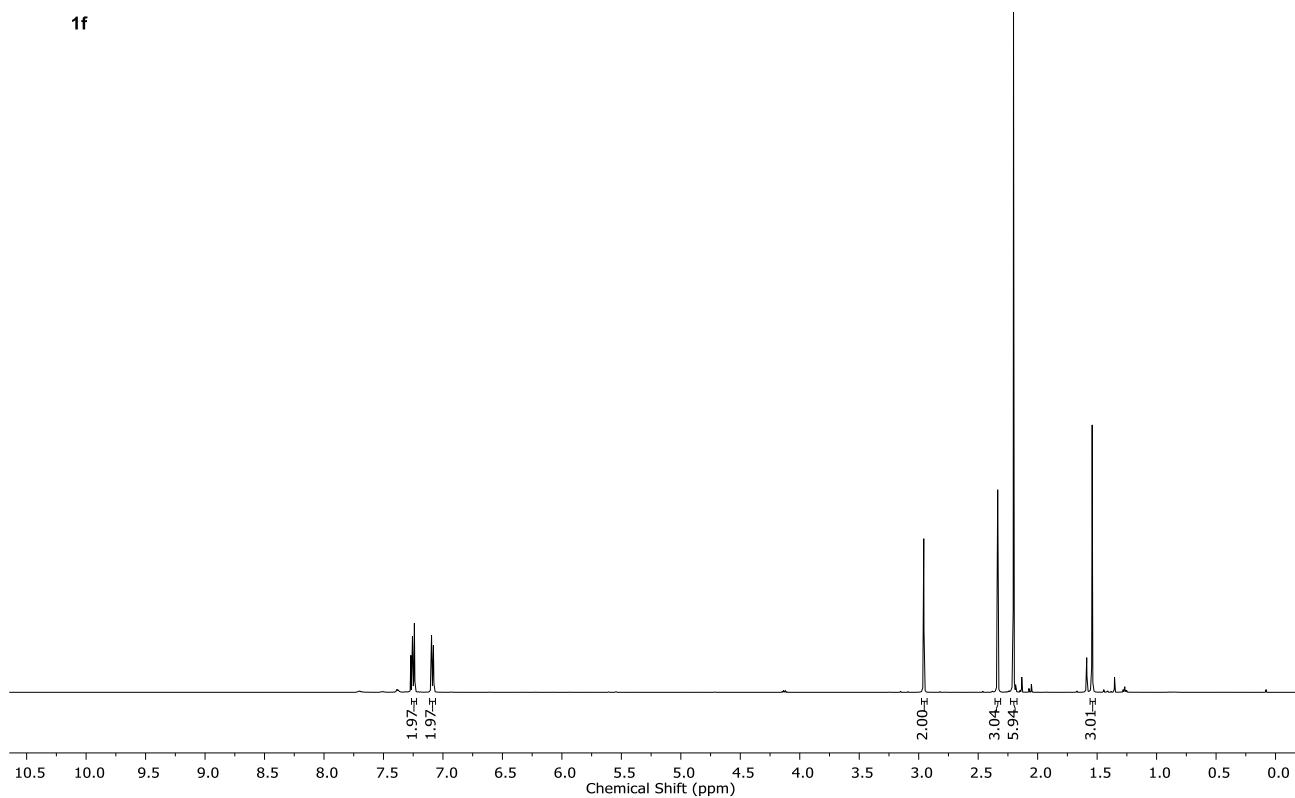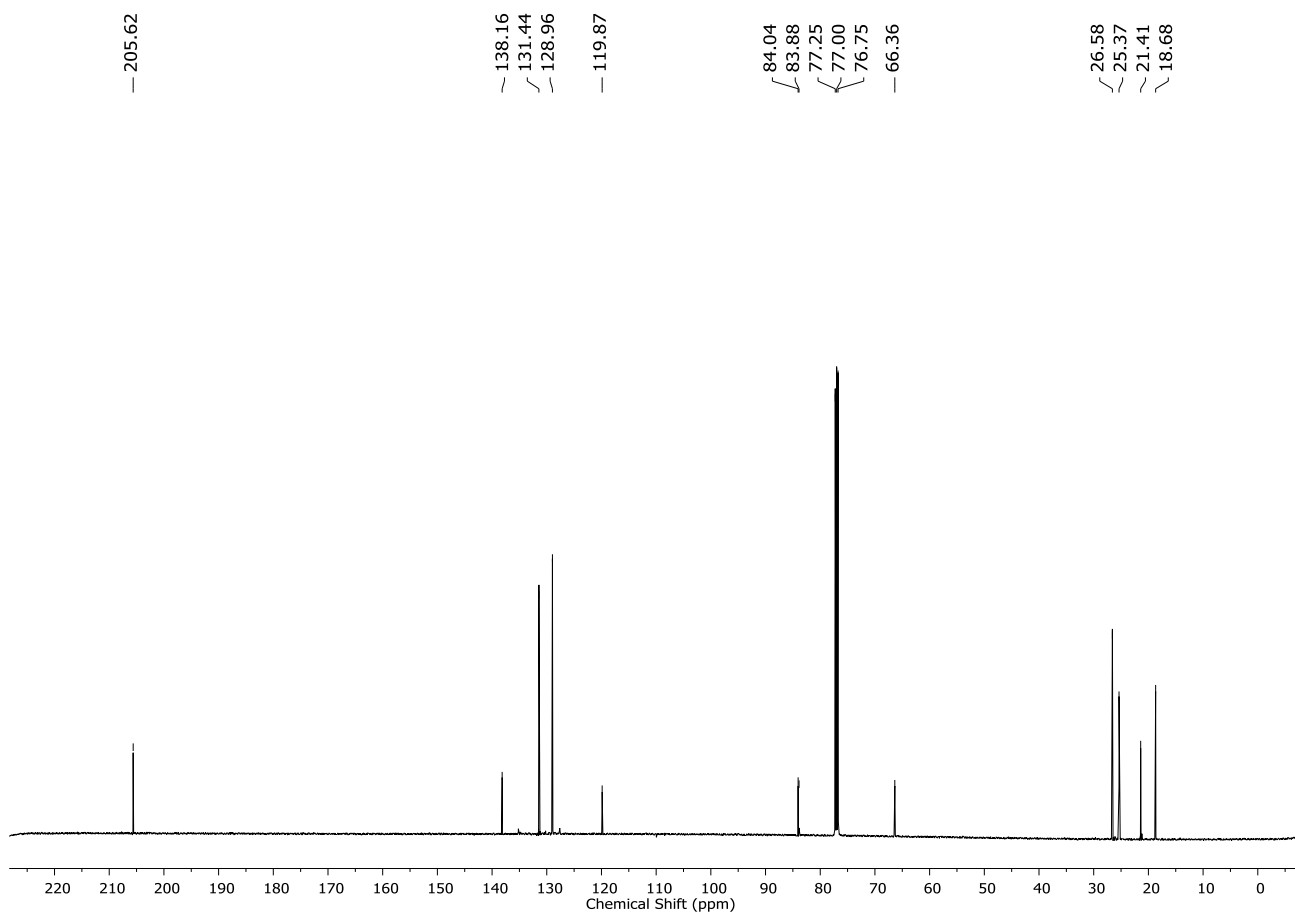

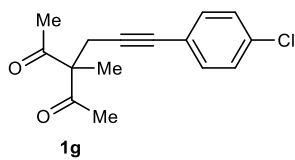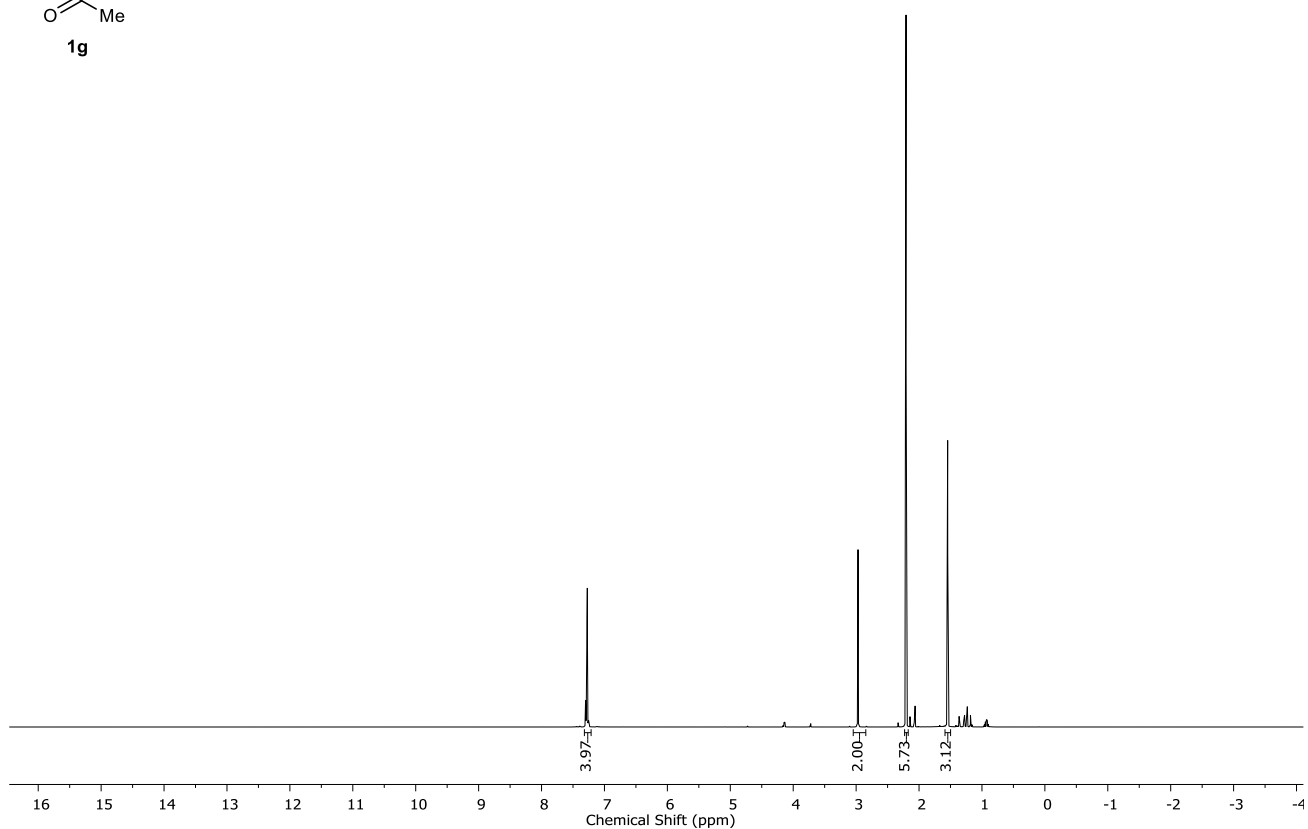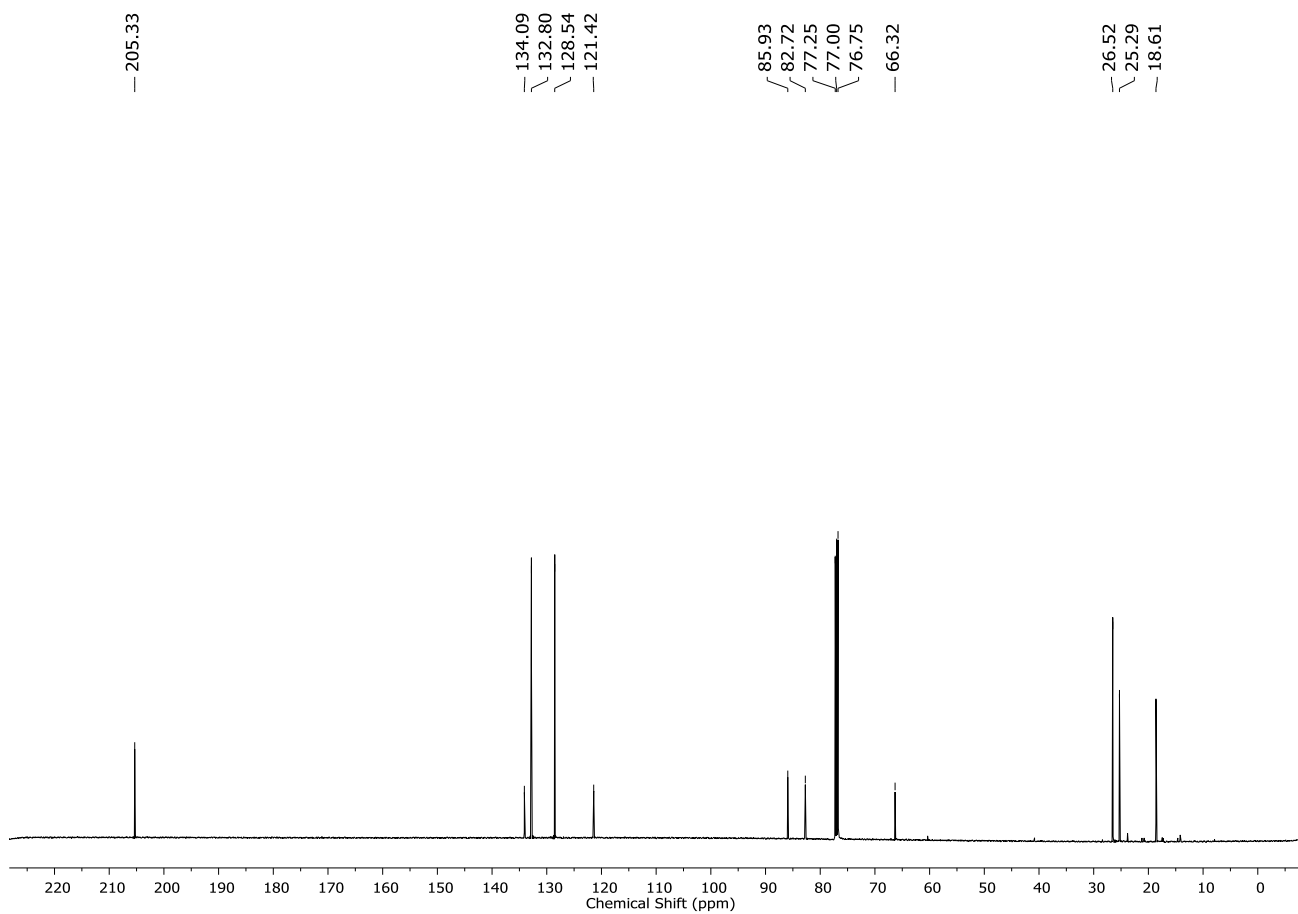

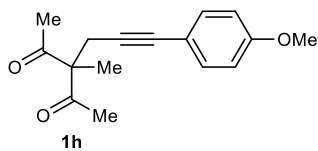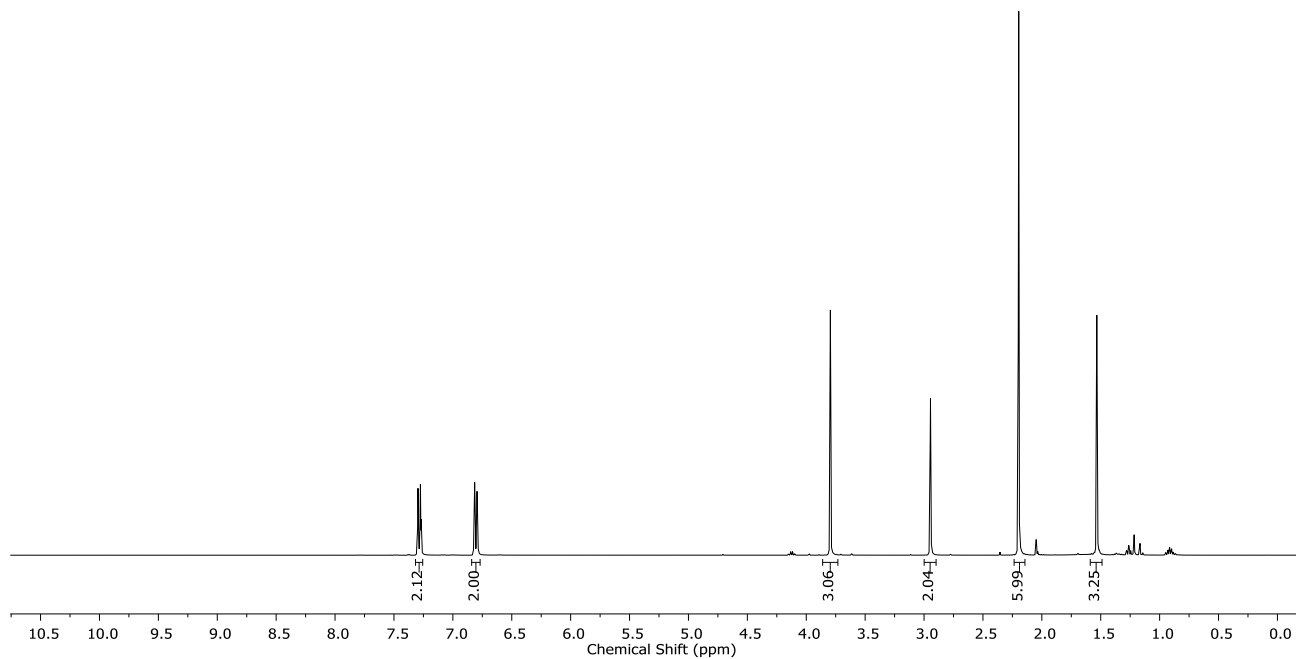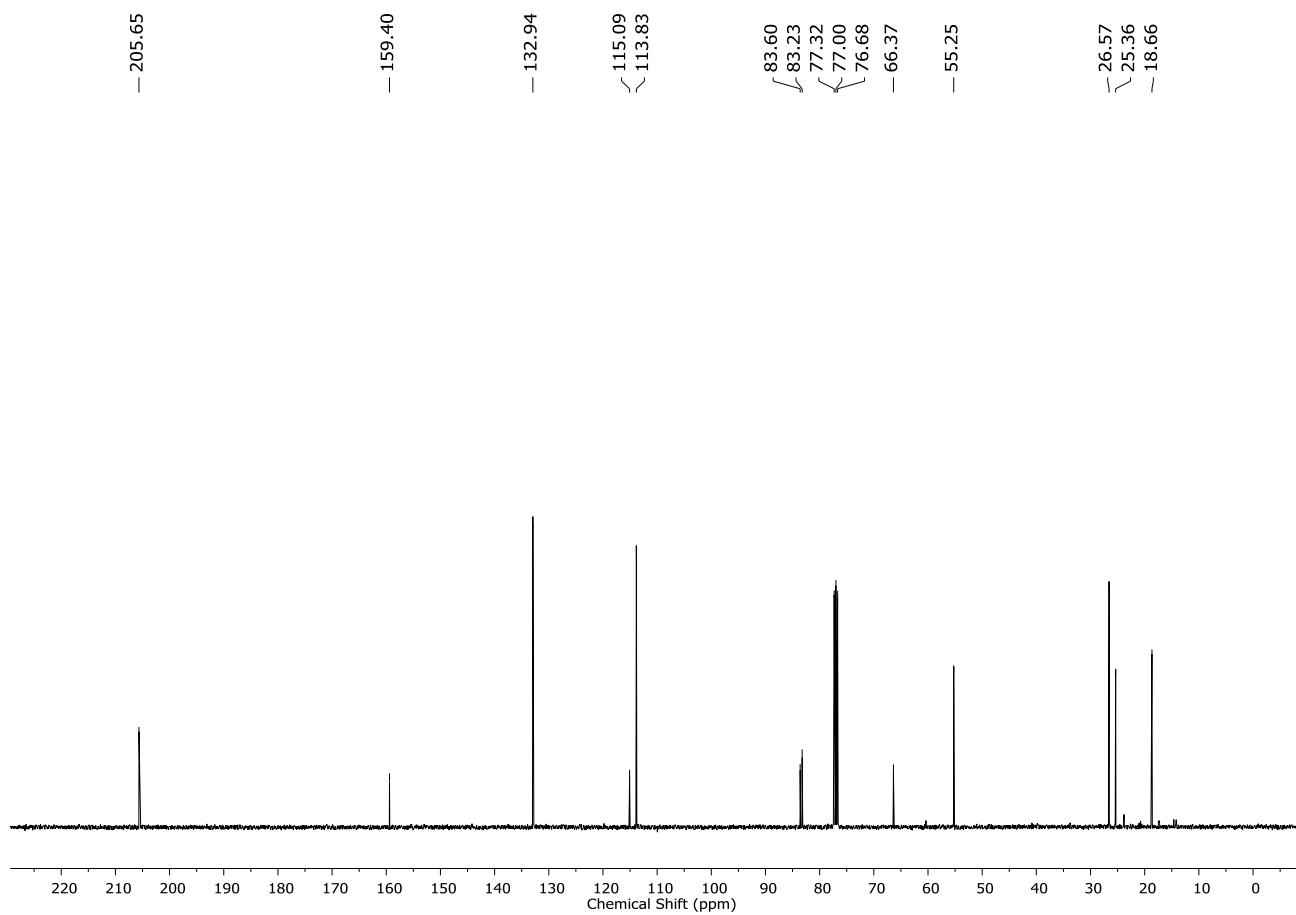

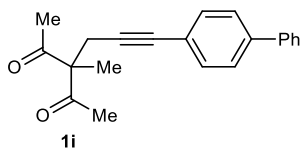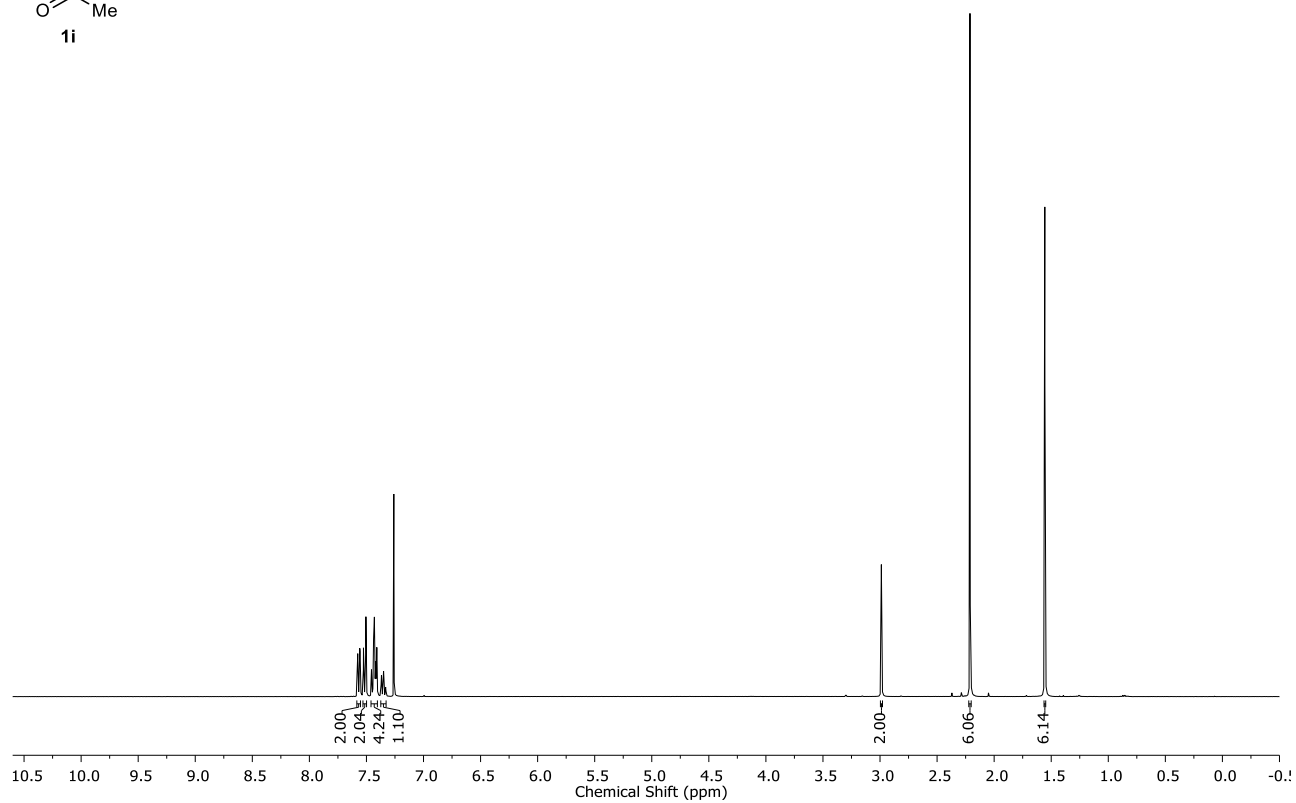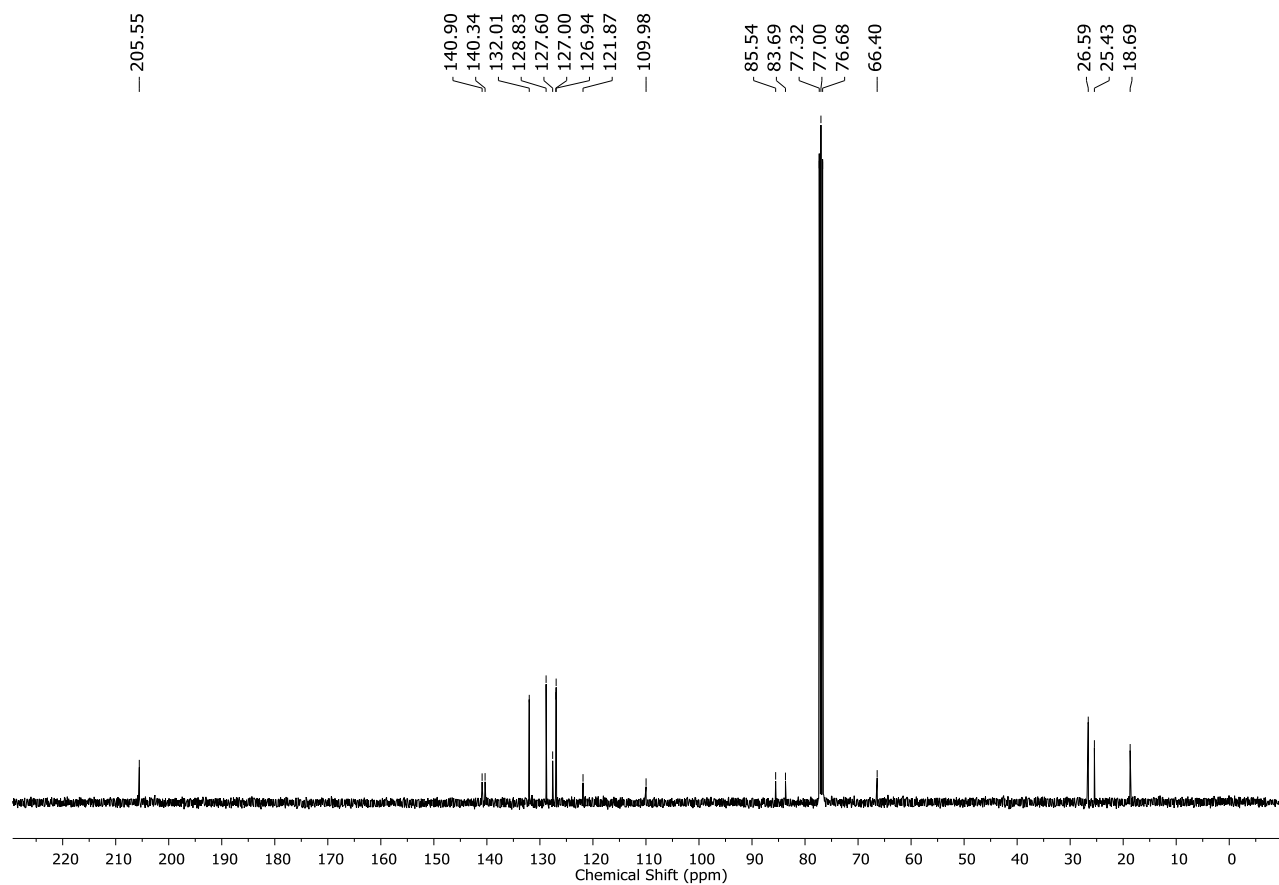



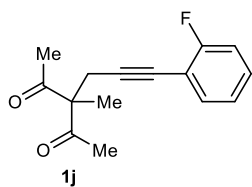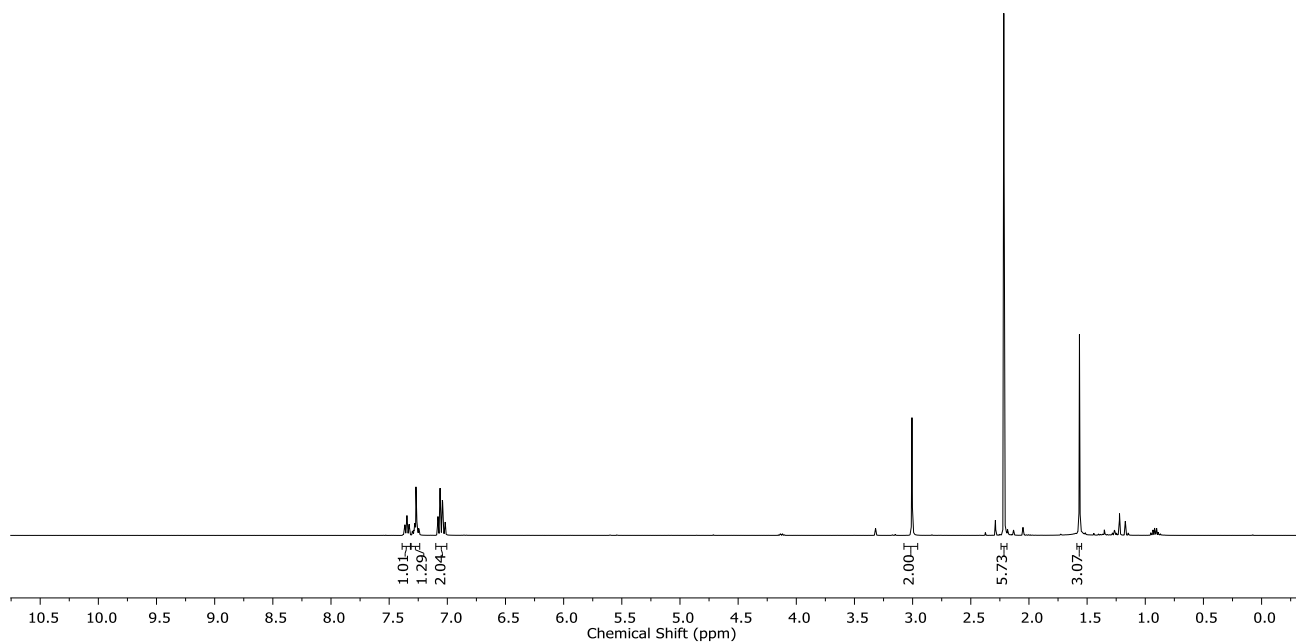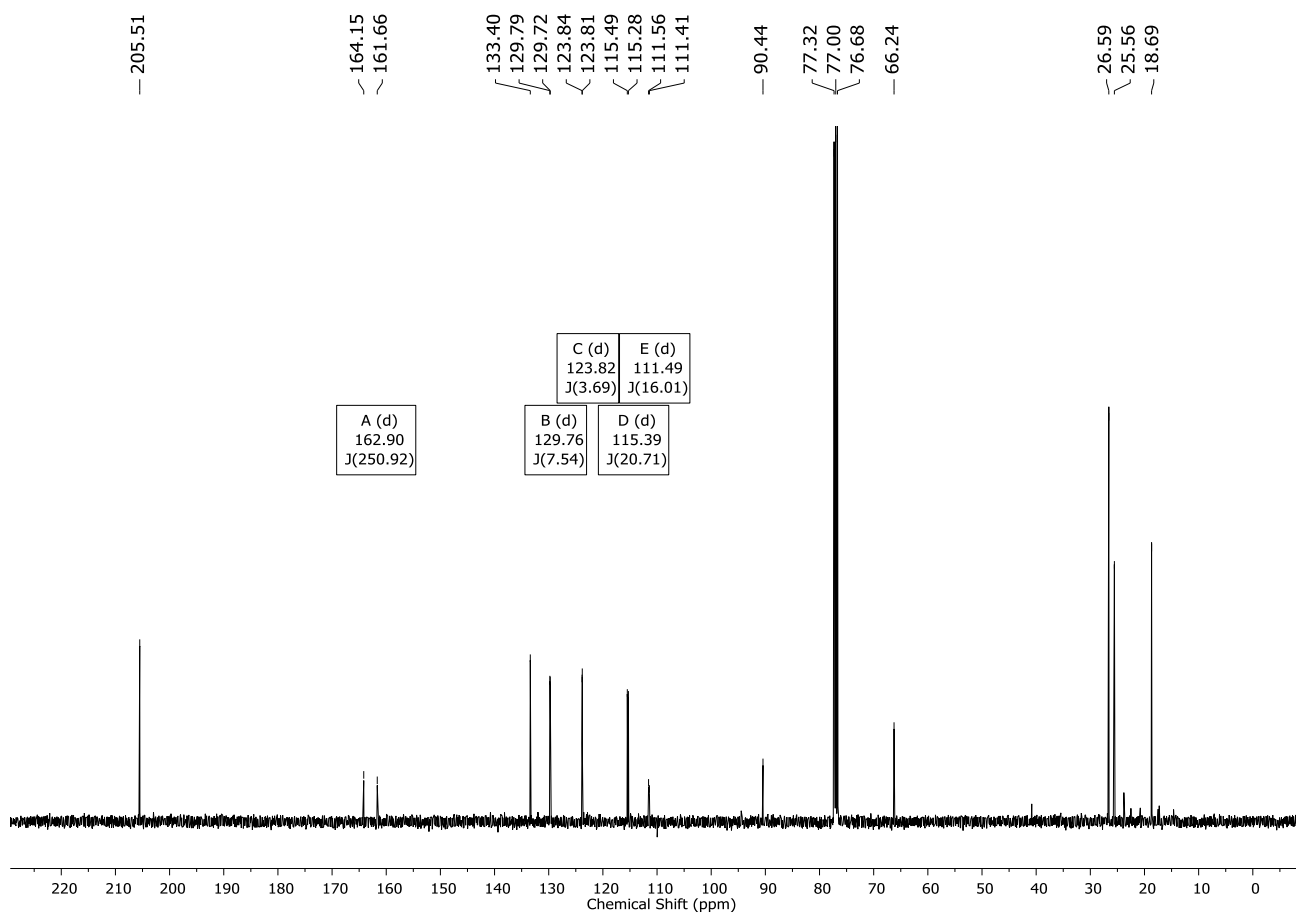

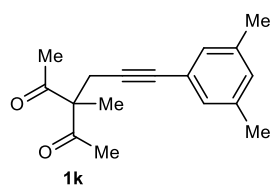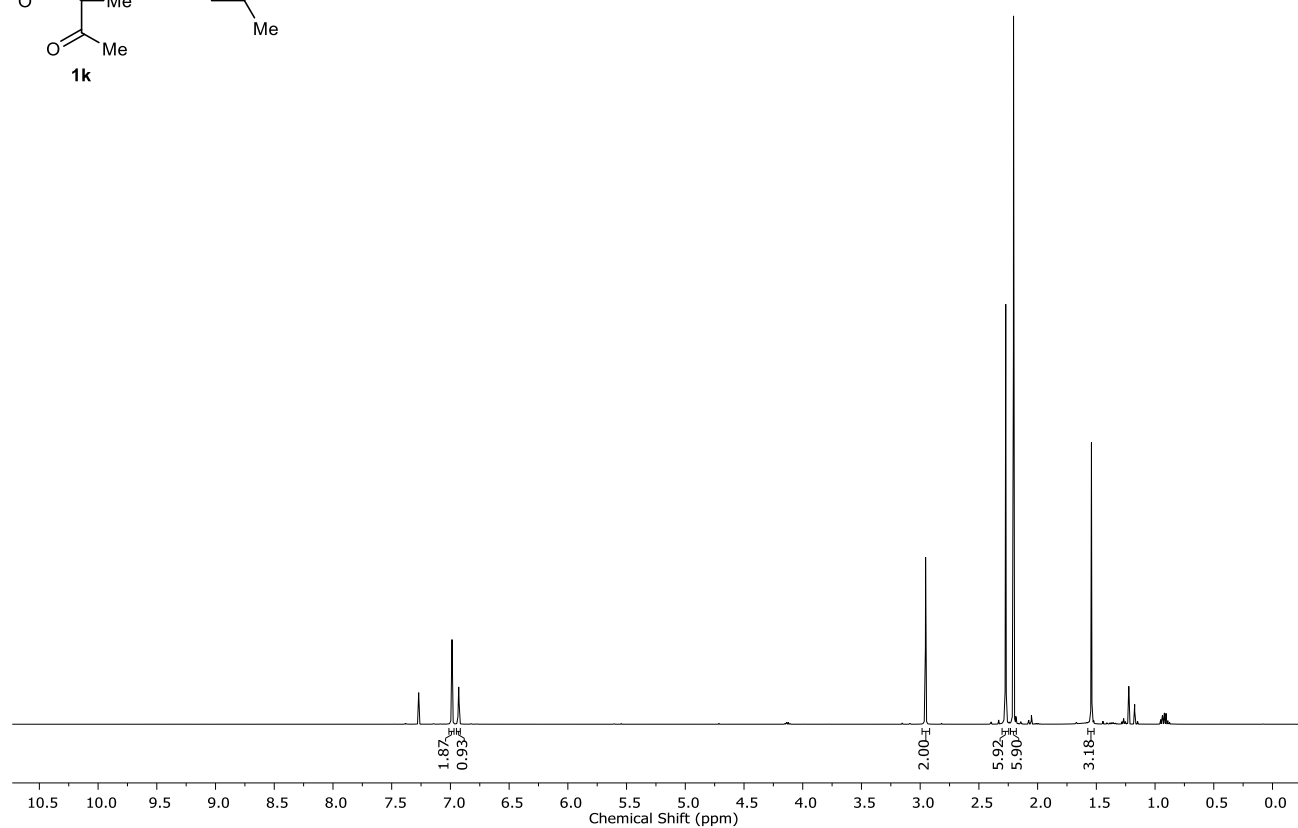

— 205.61

~ 137.80  
~ 129.99  
~ 129.23  
~ 122.55~ 84.09  
~ 83.99  
~ 77.25  
~ 77.00  
~ 76.75  
— 66.37~ 26.57  
~ 25.34  
~ 21.03  
~ 18.67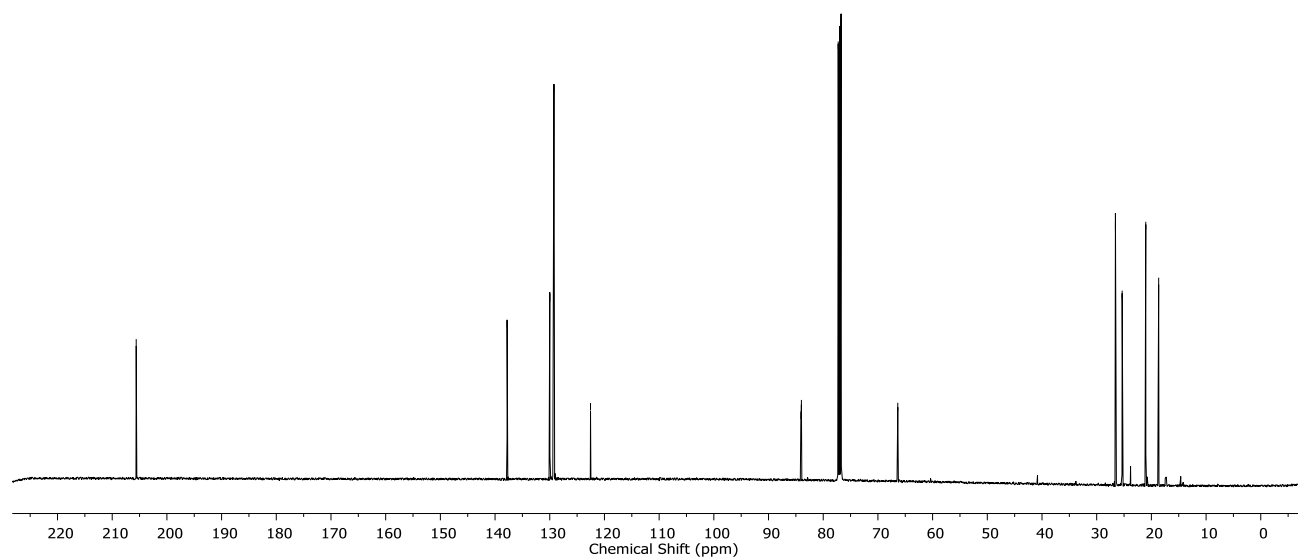

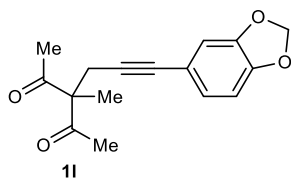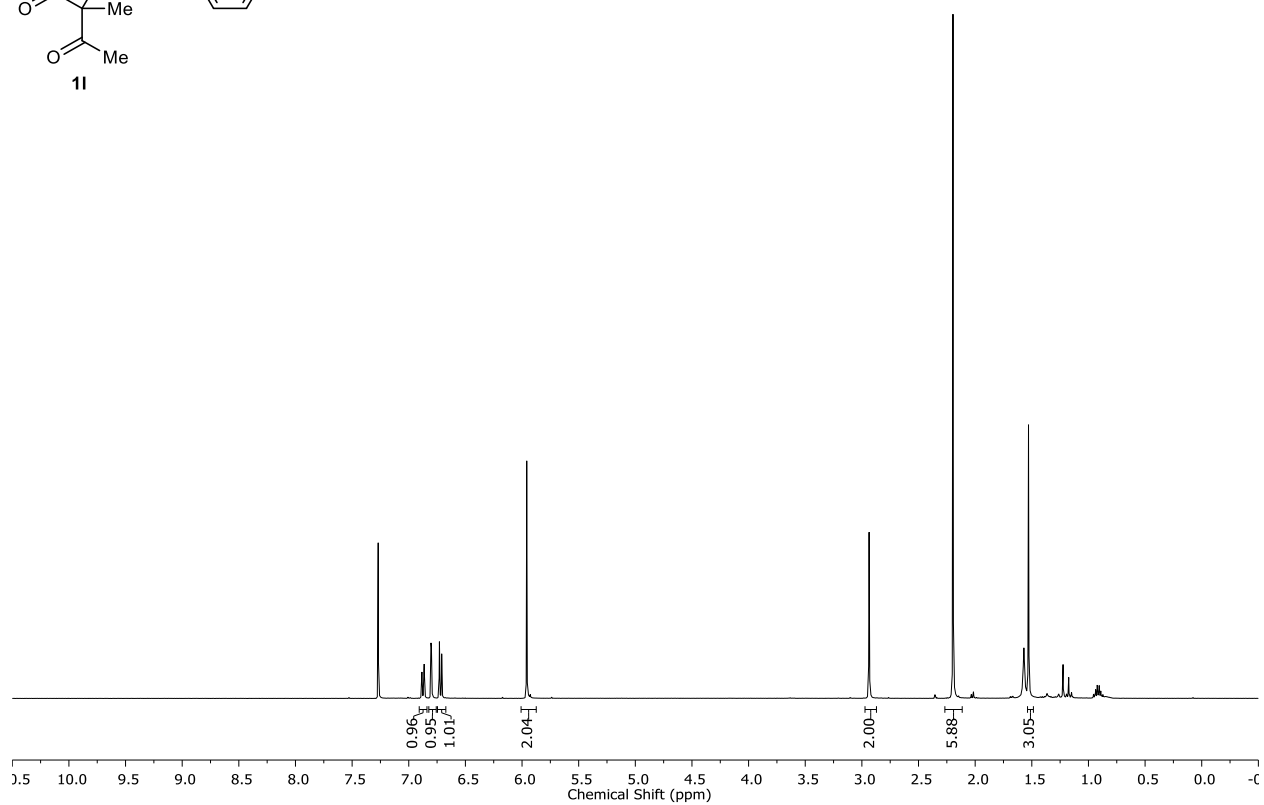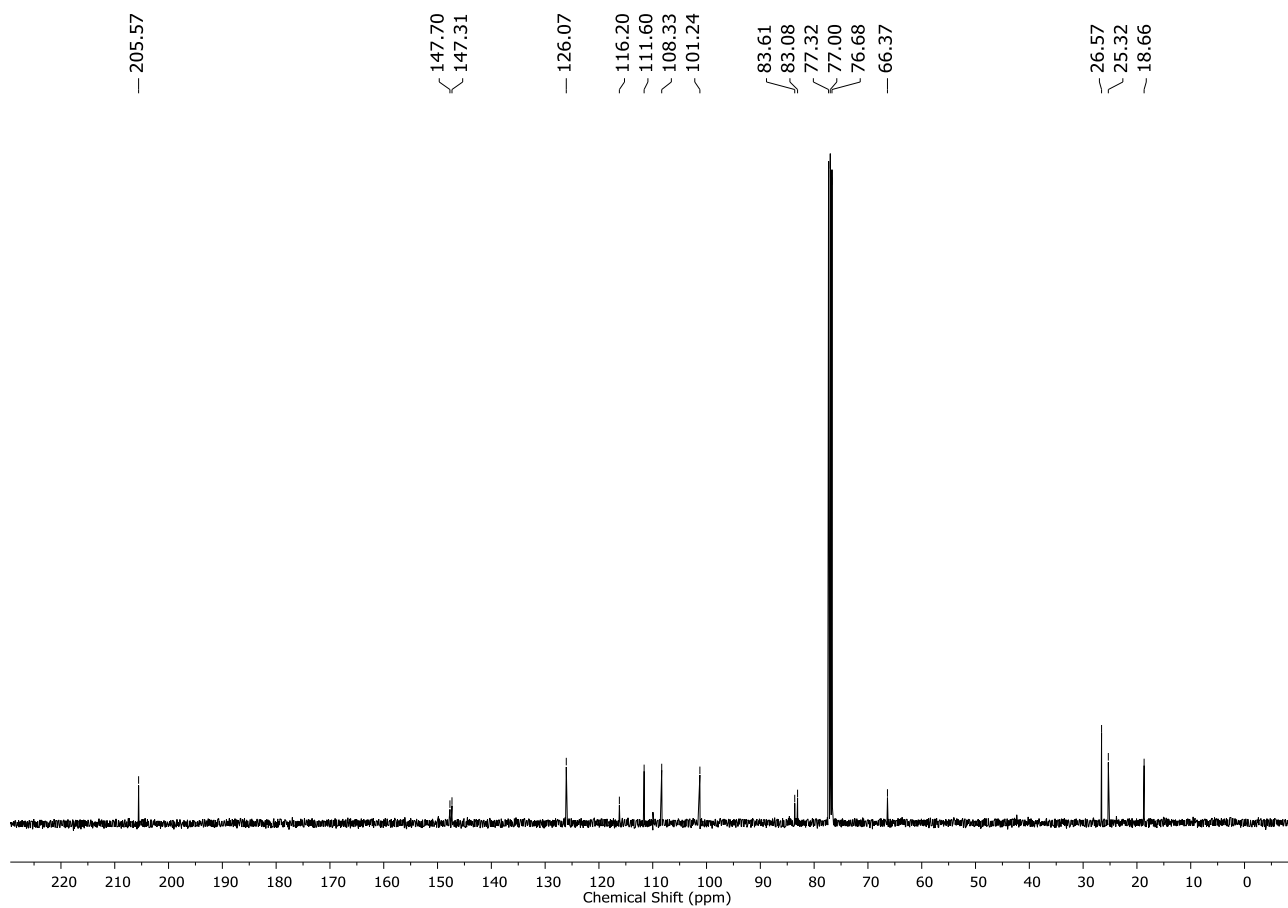

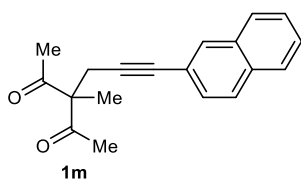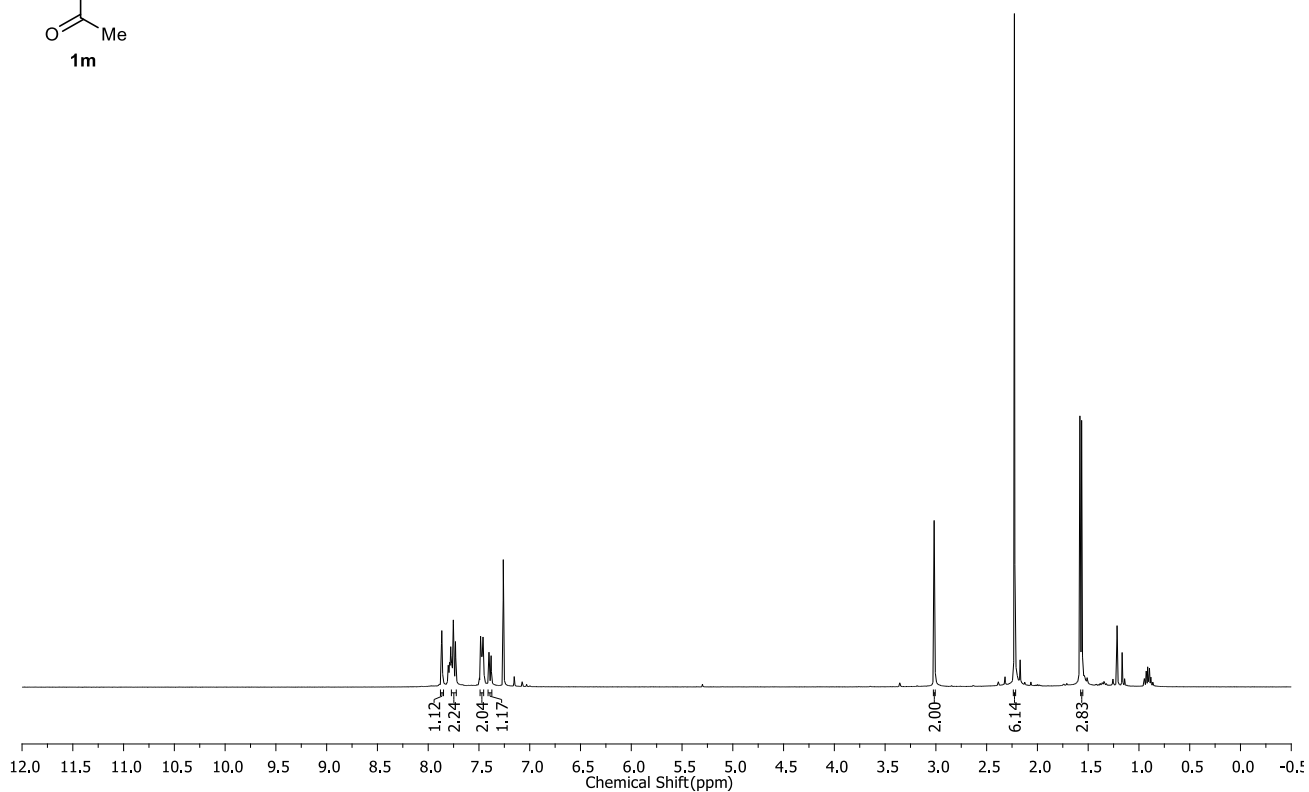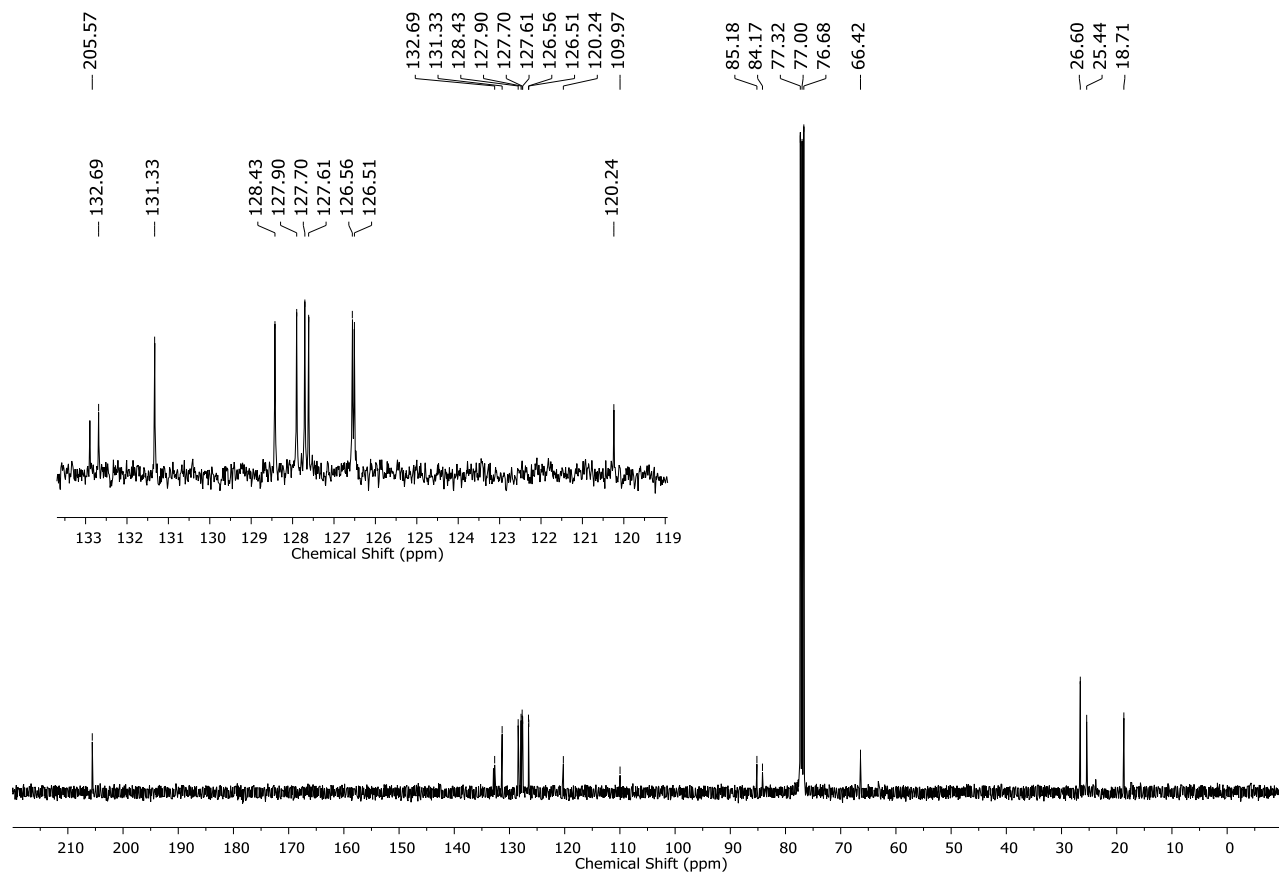

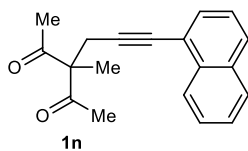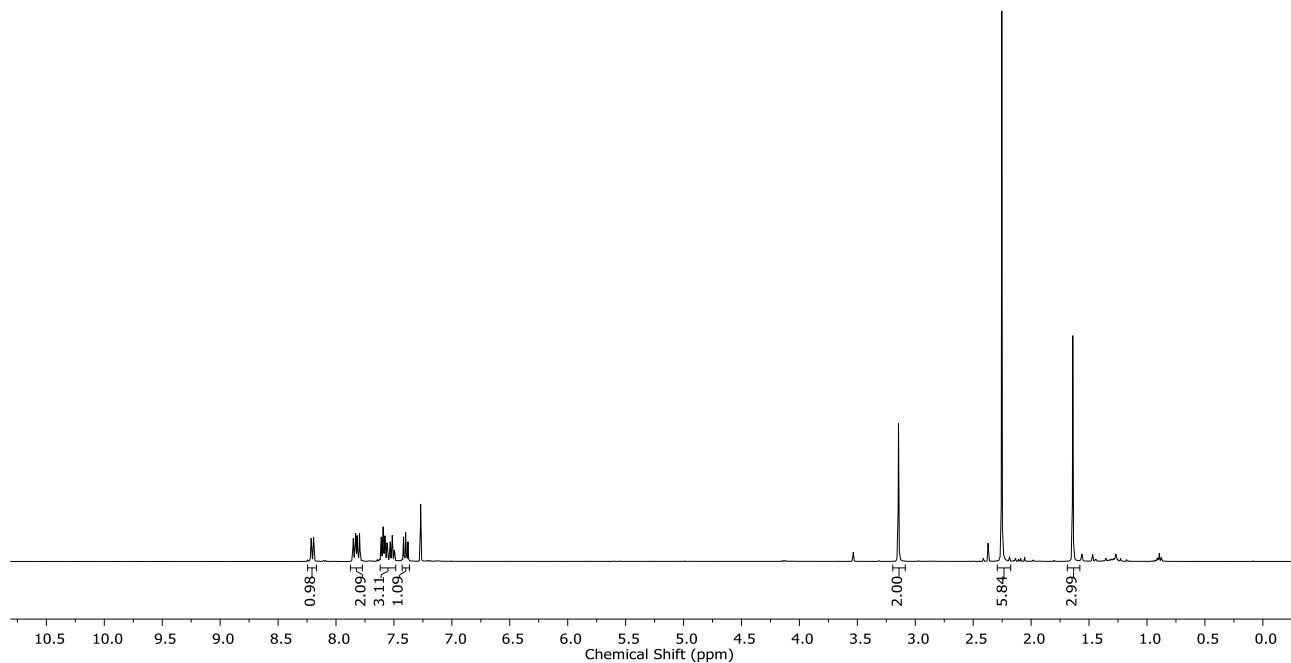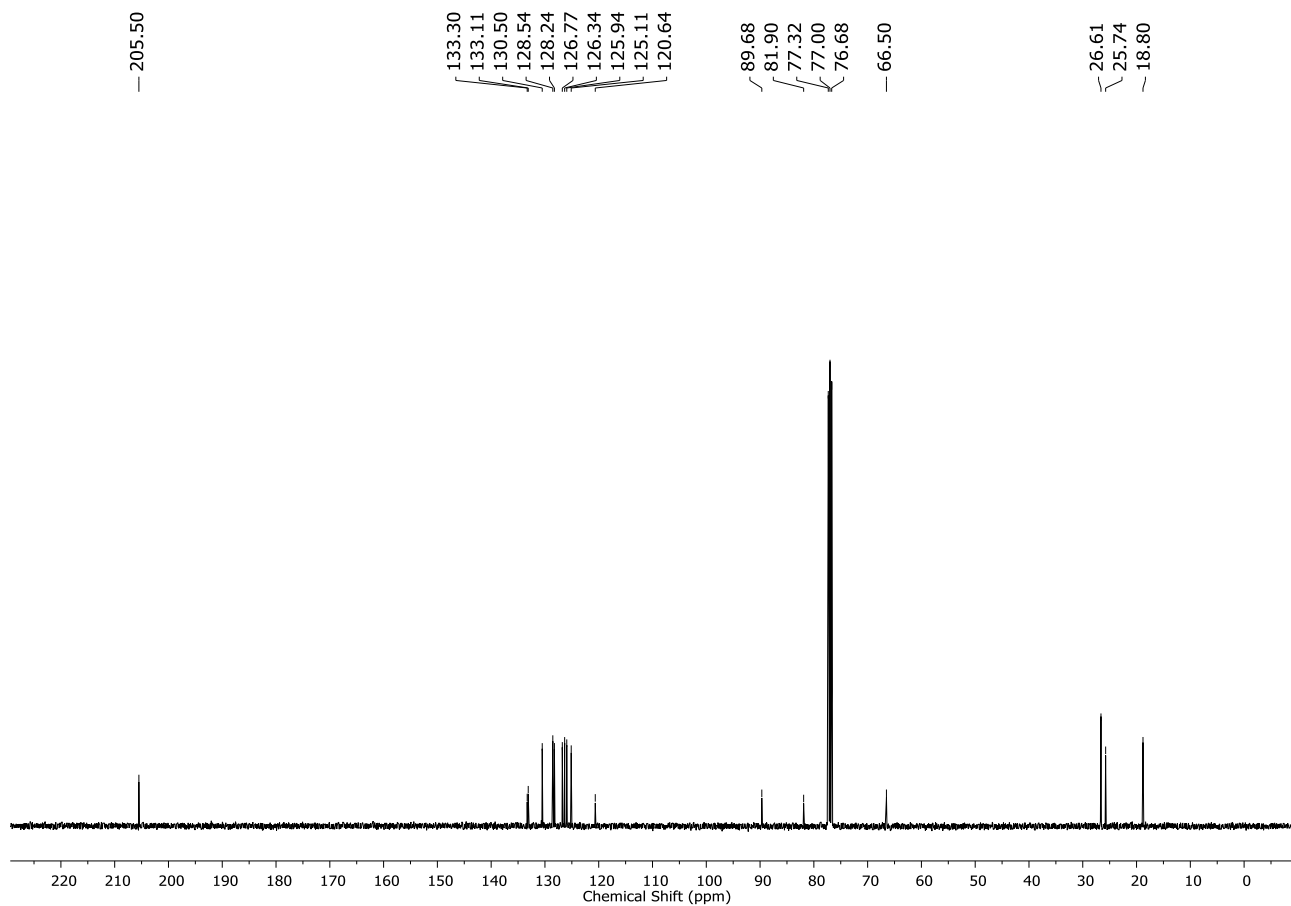

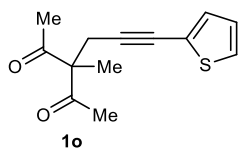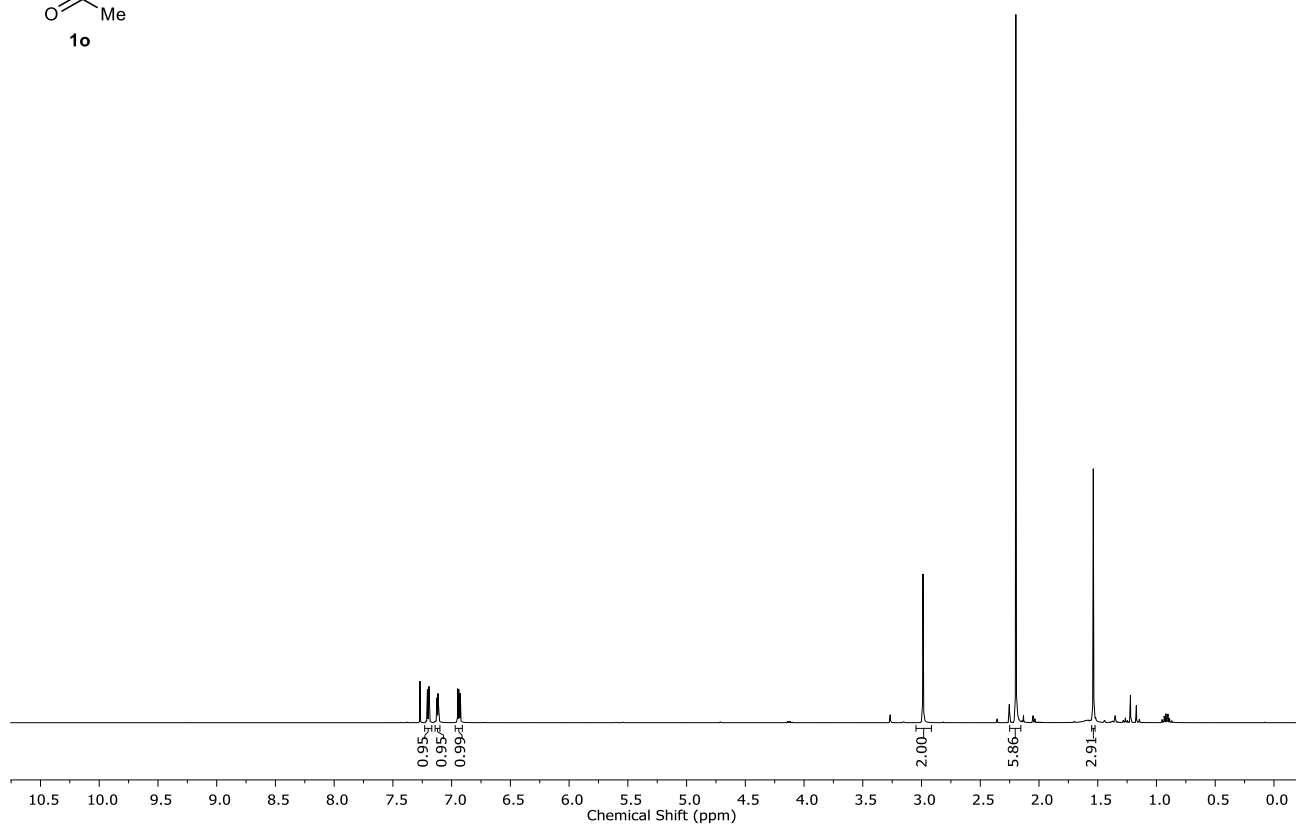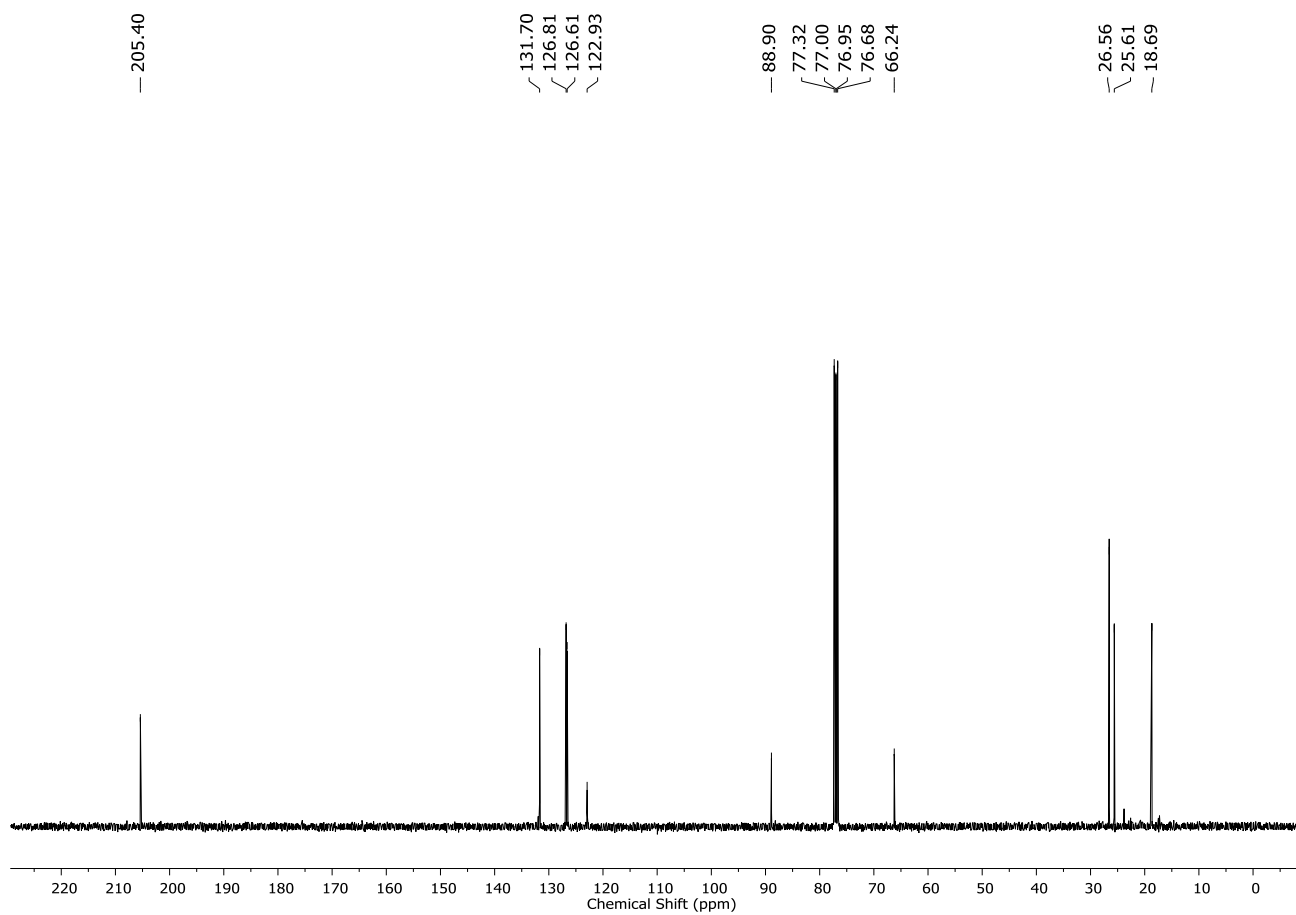

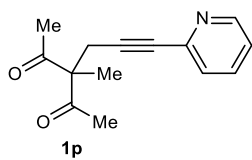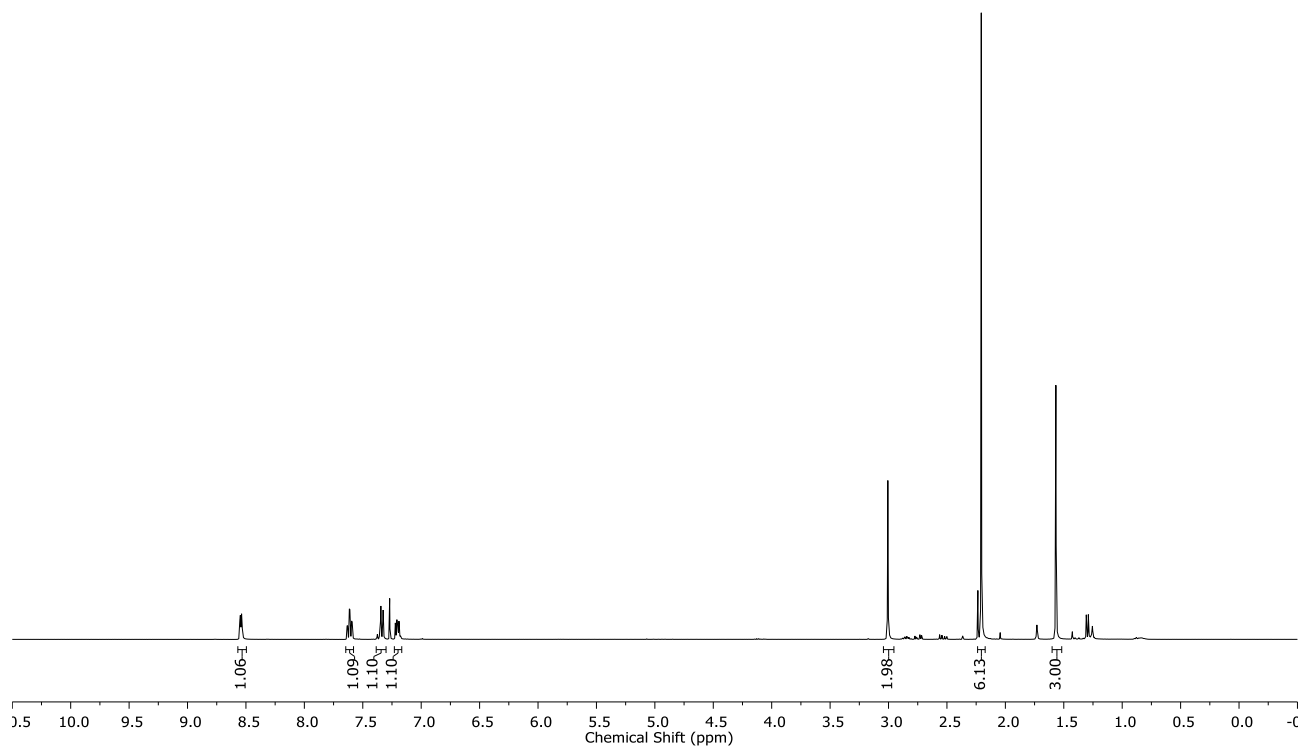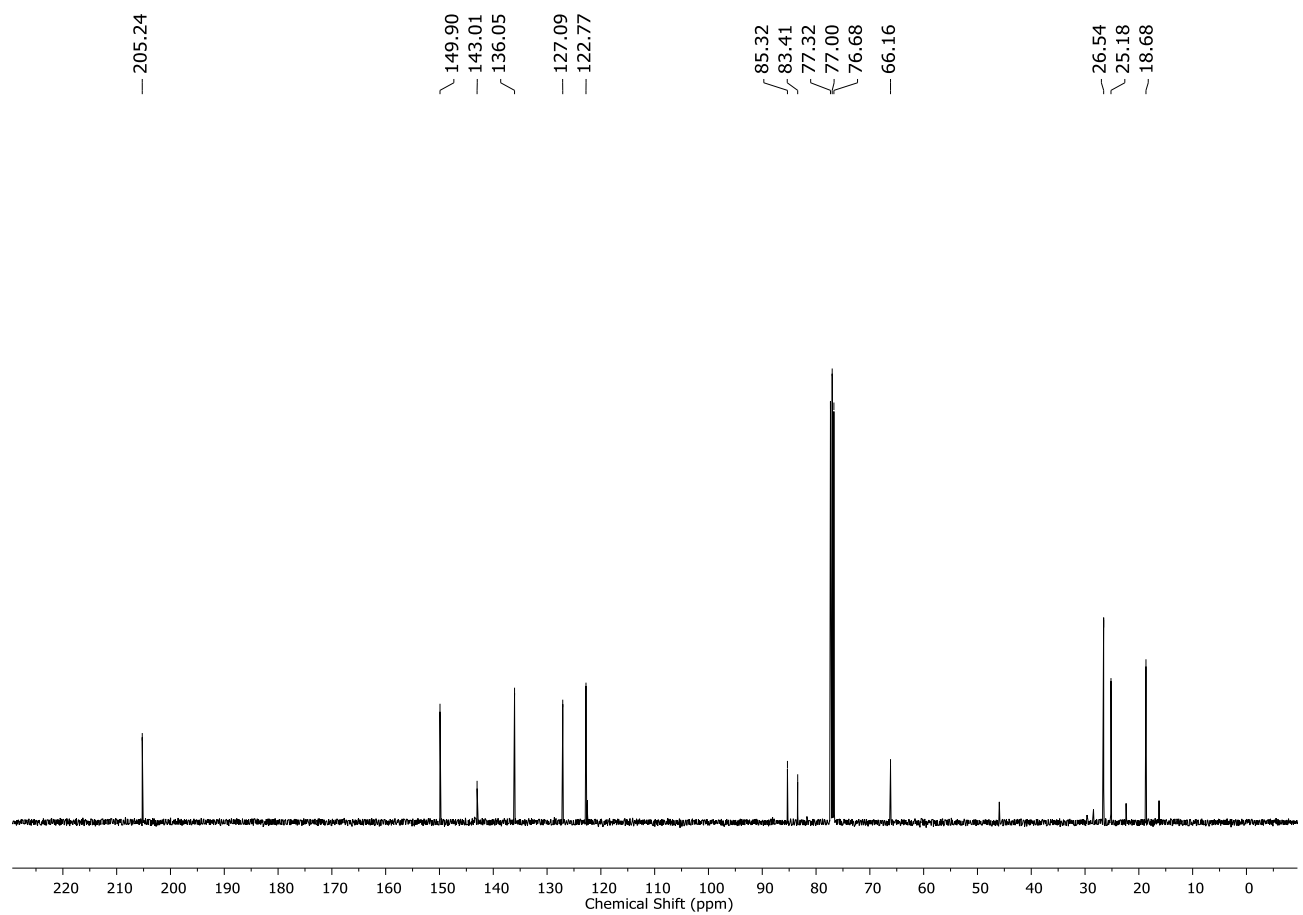

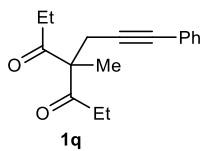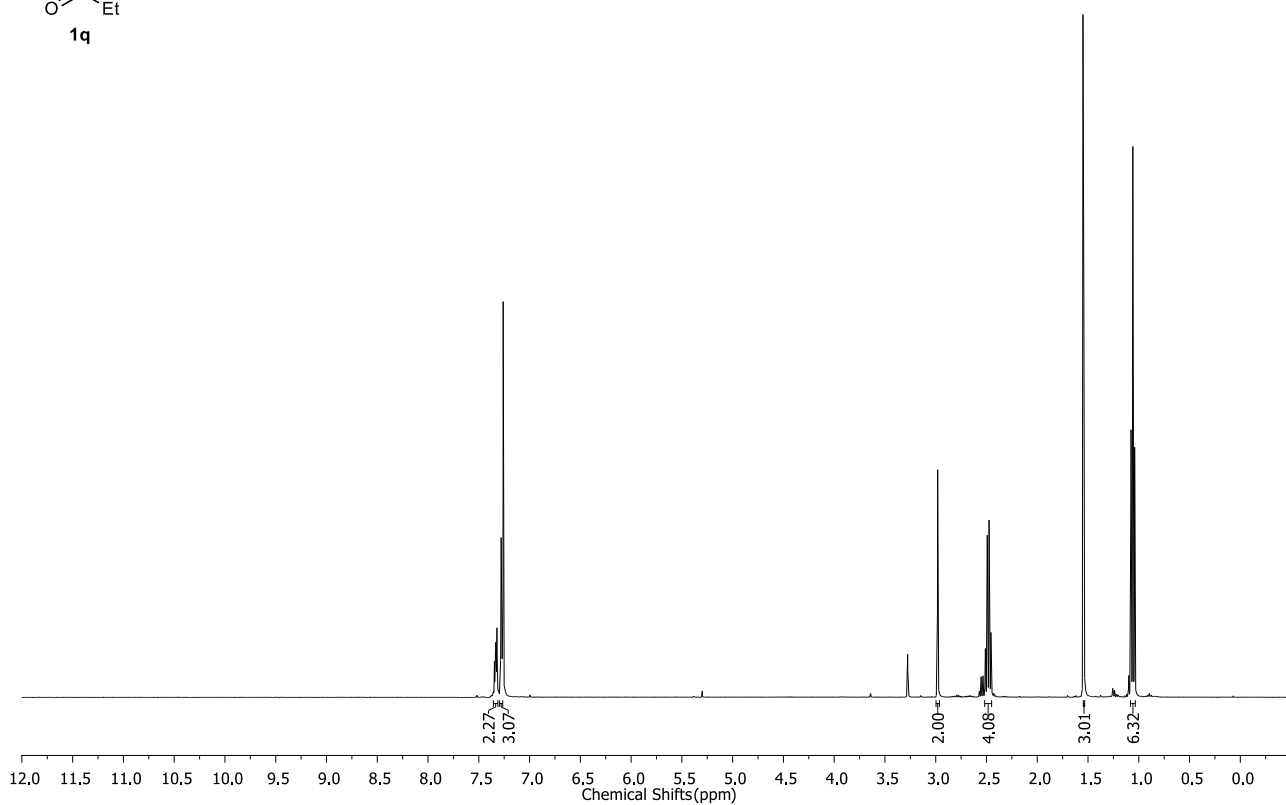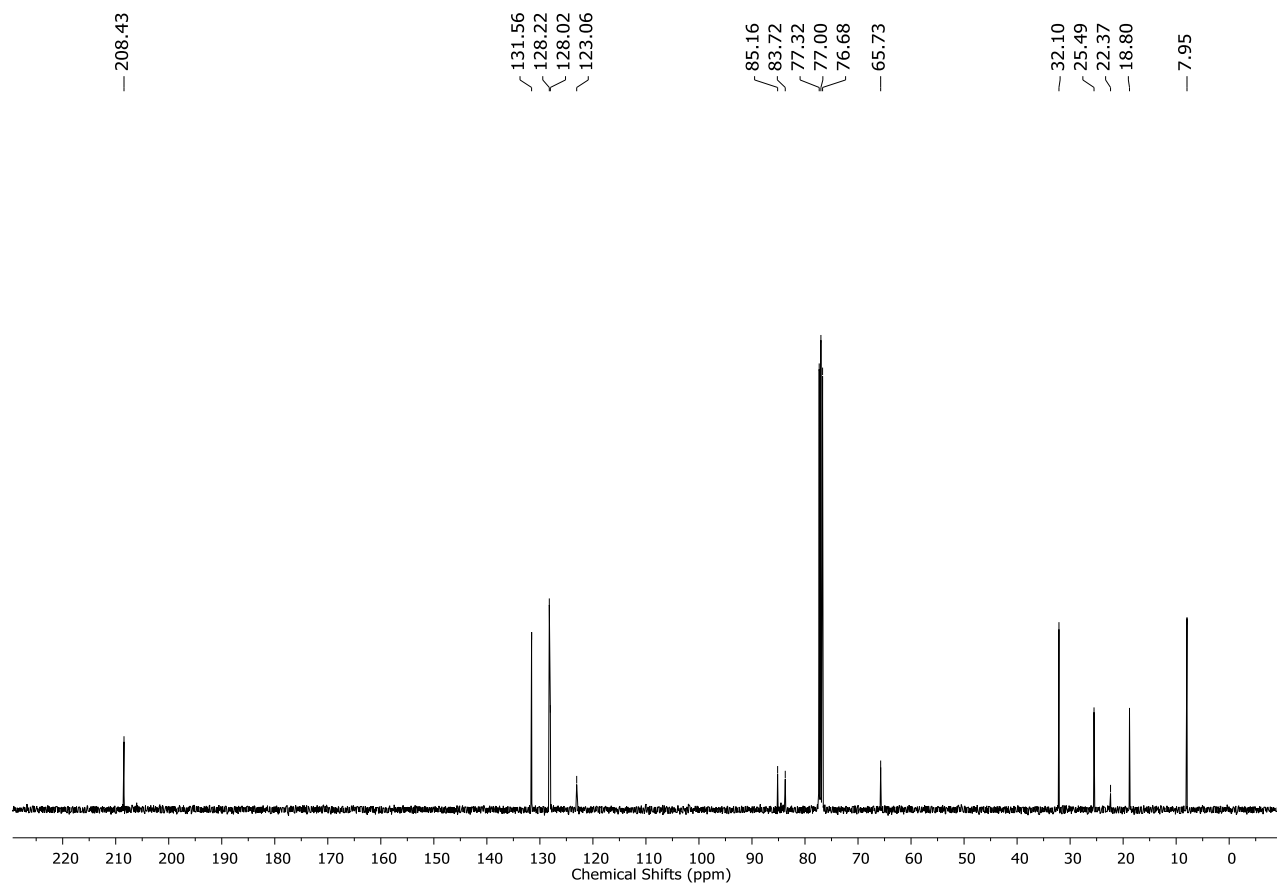



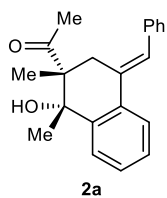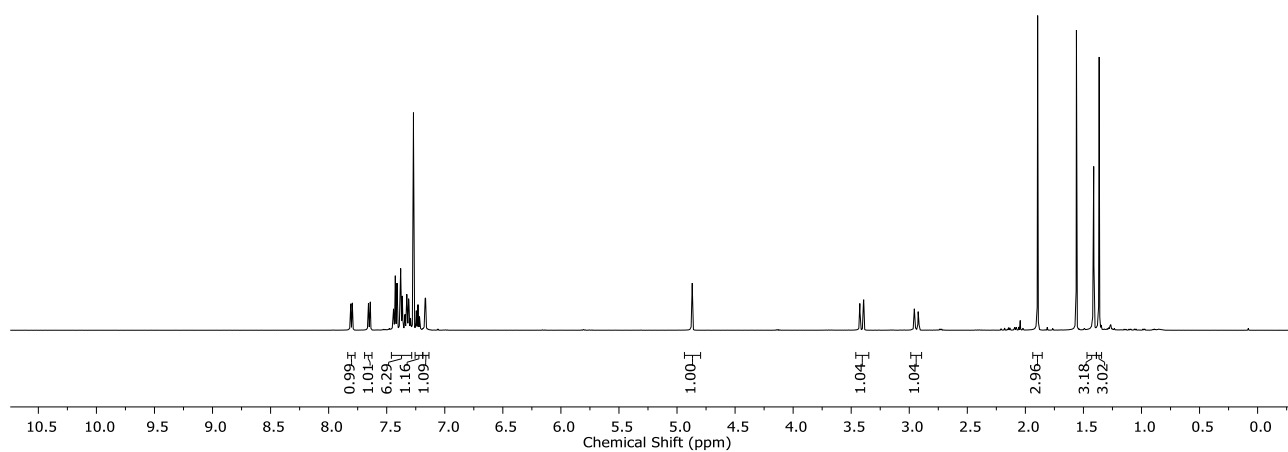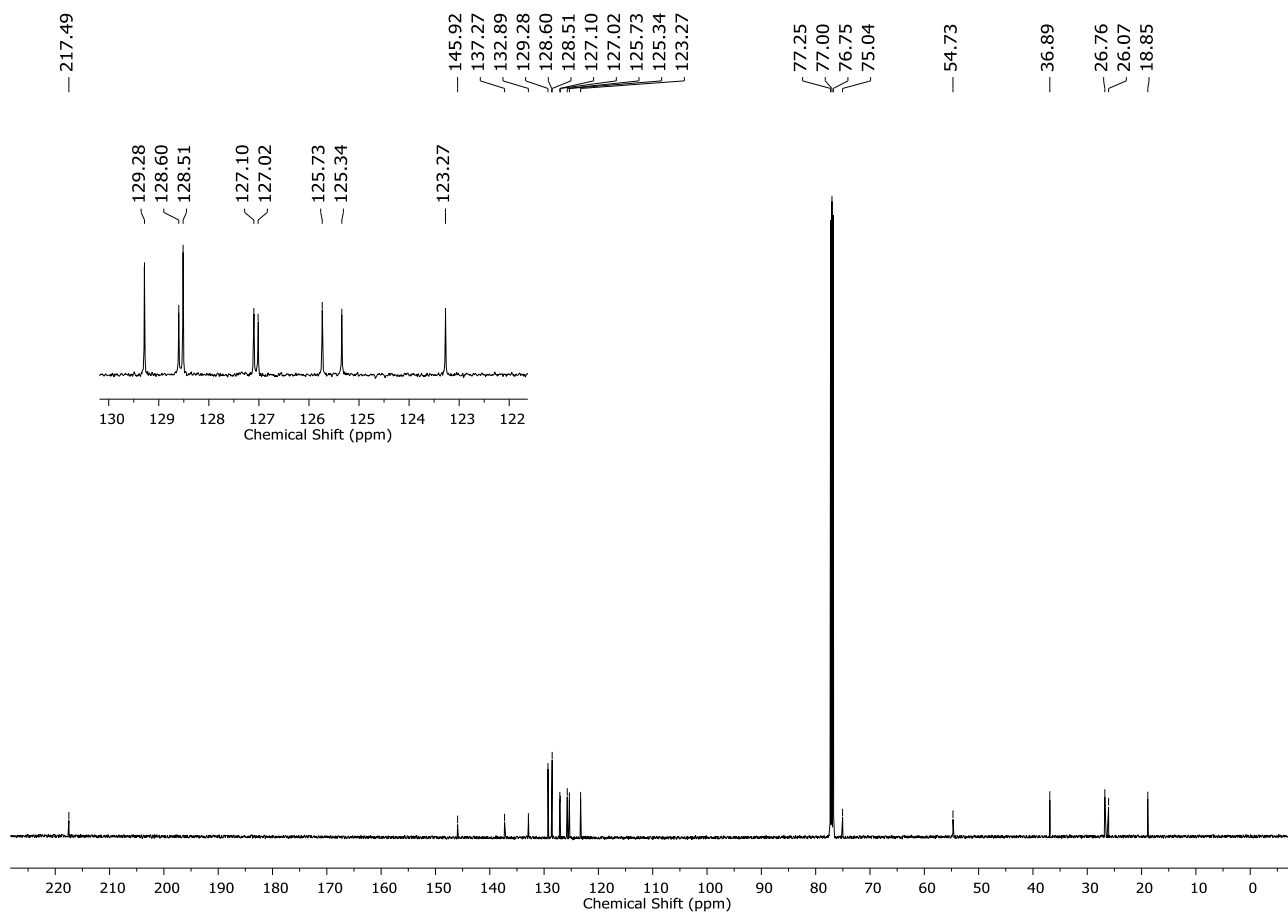

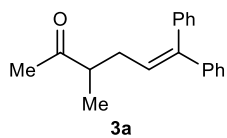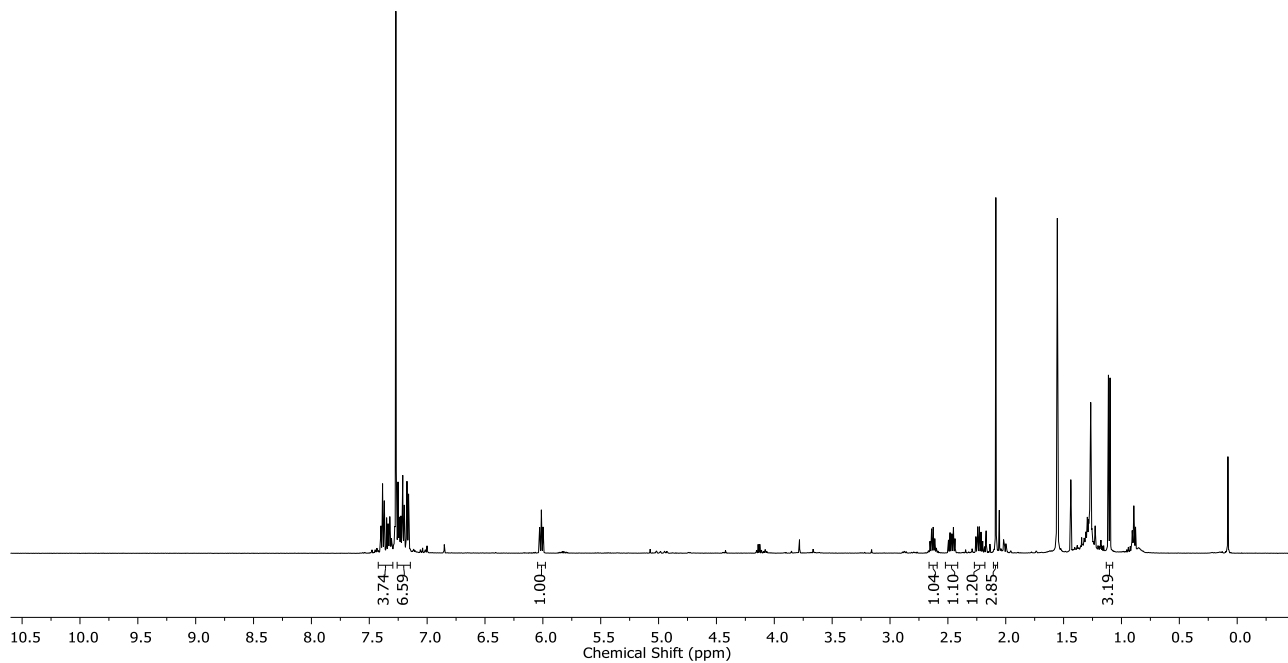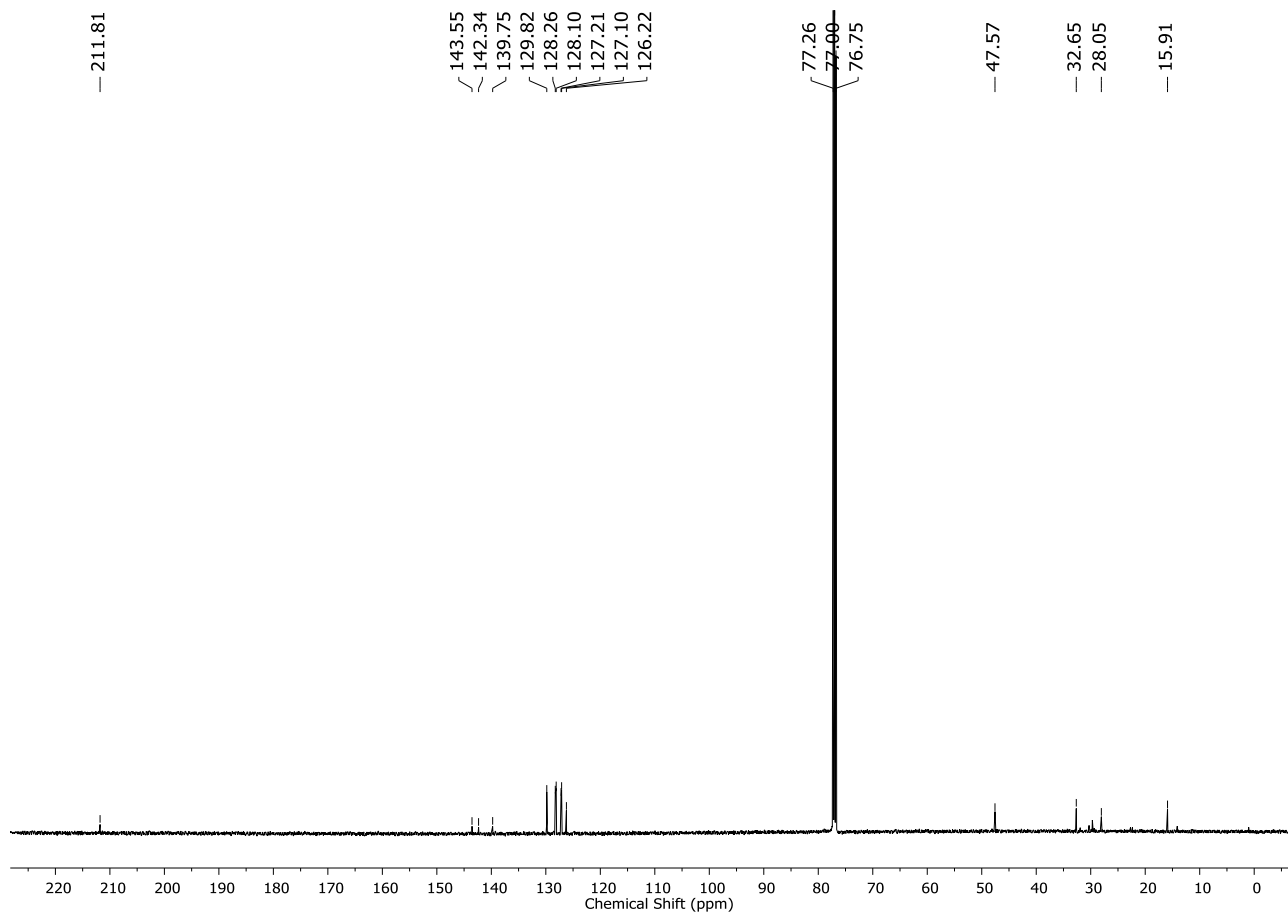

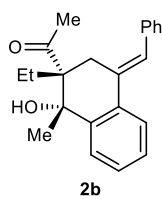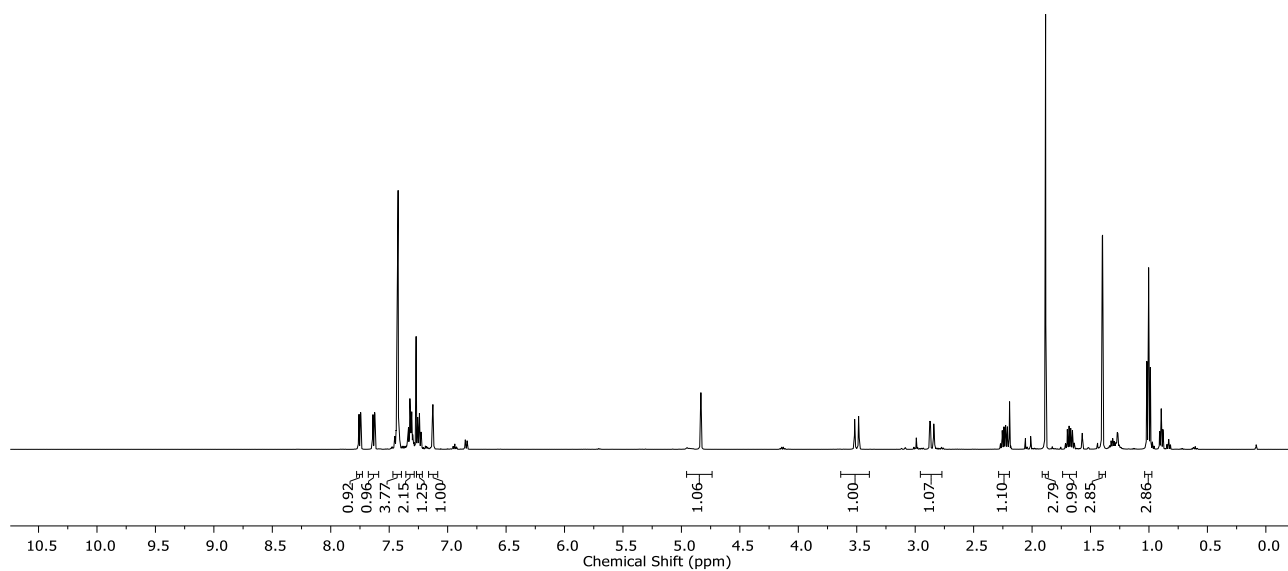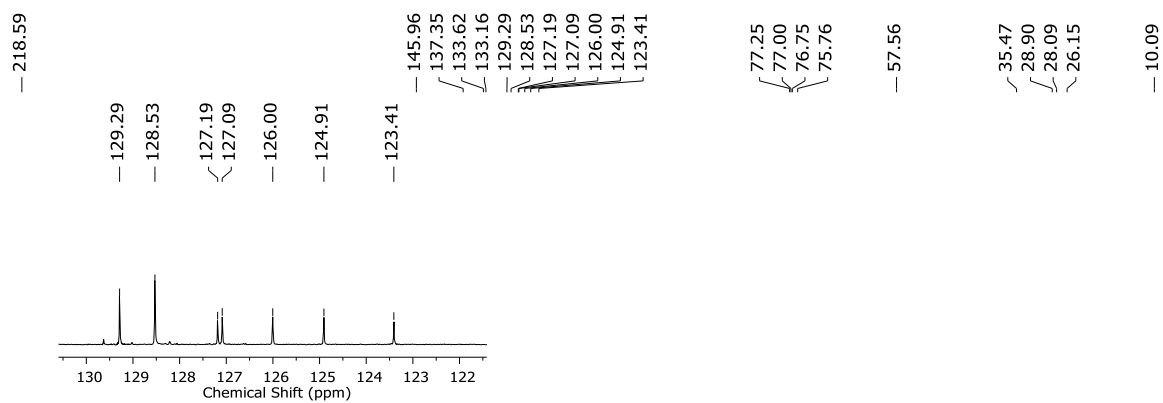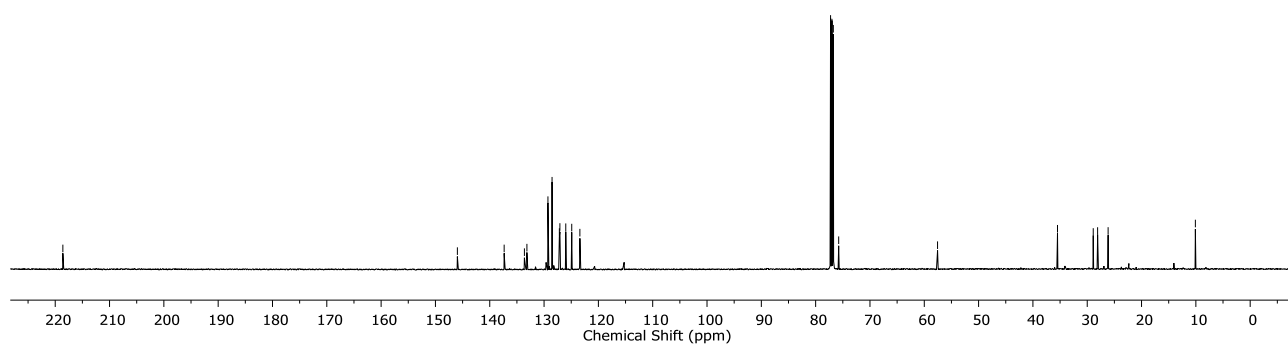

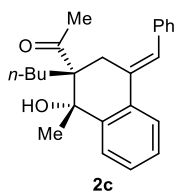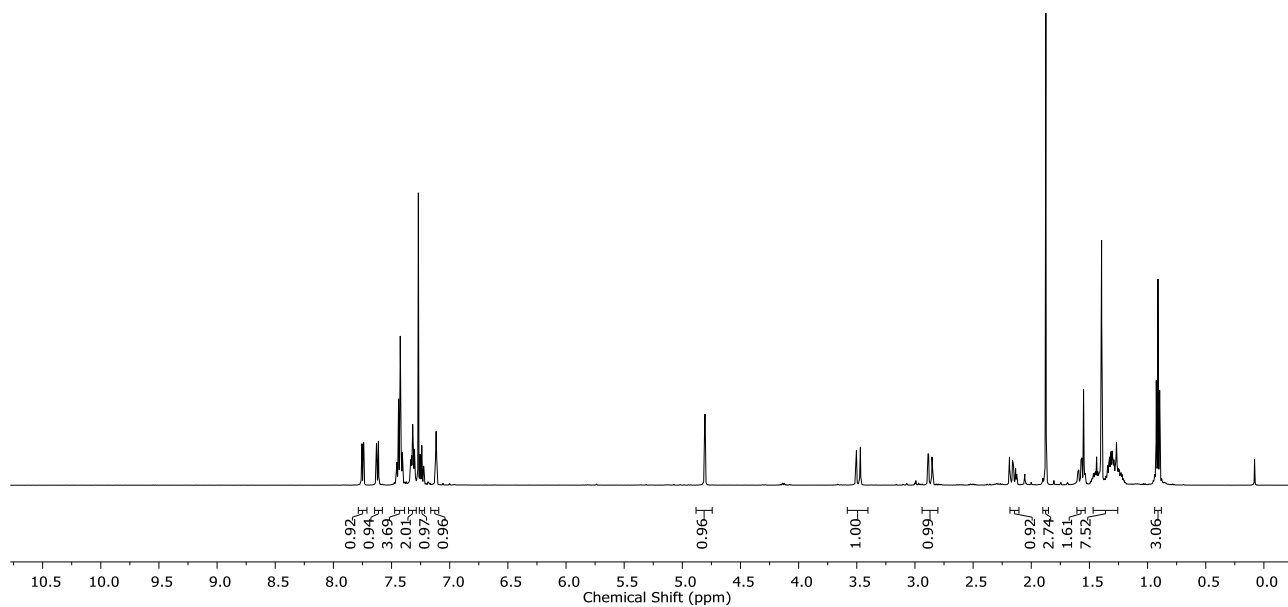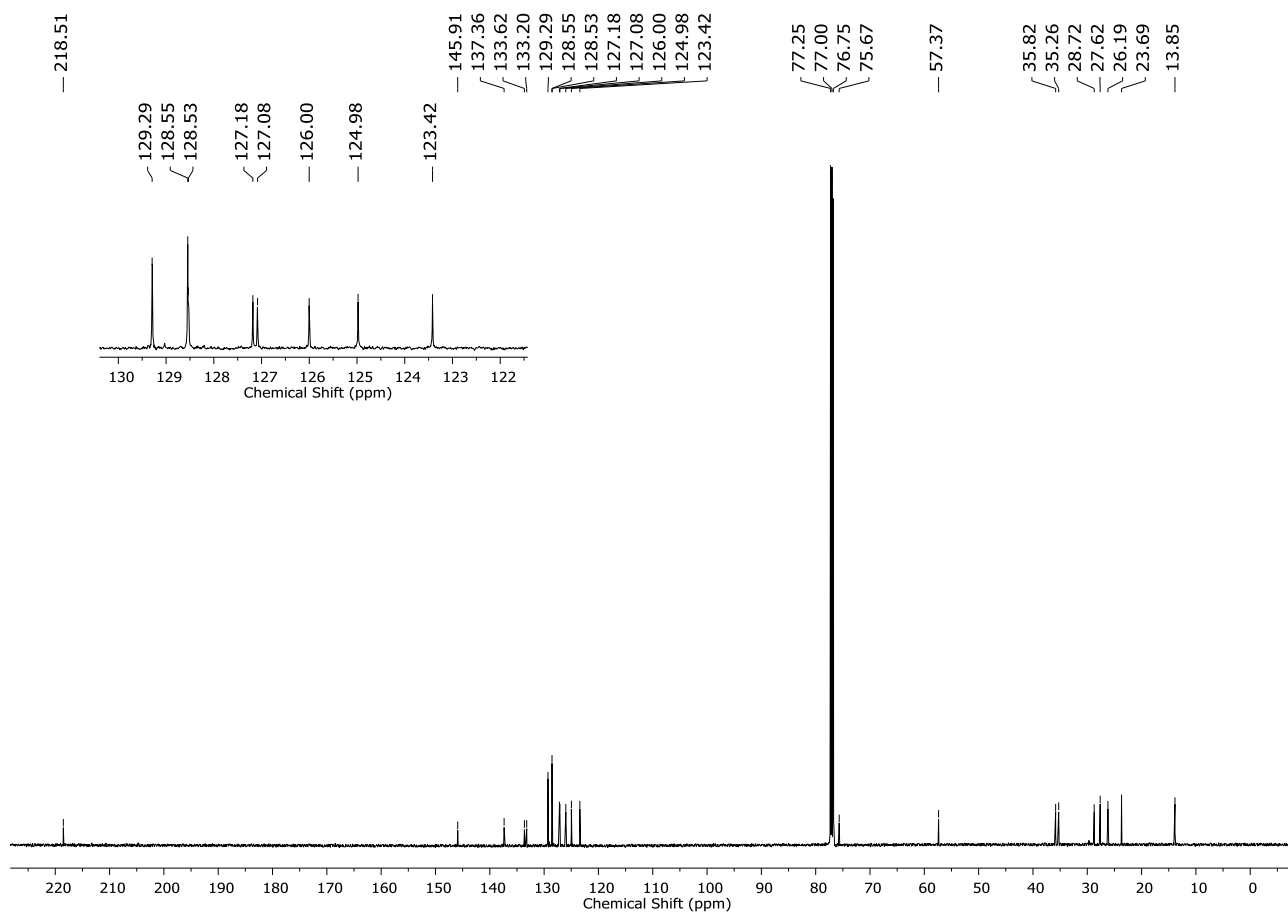

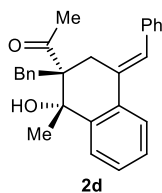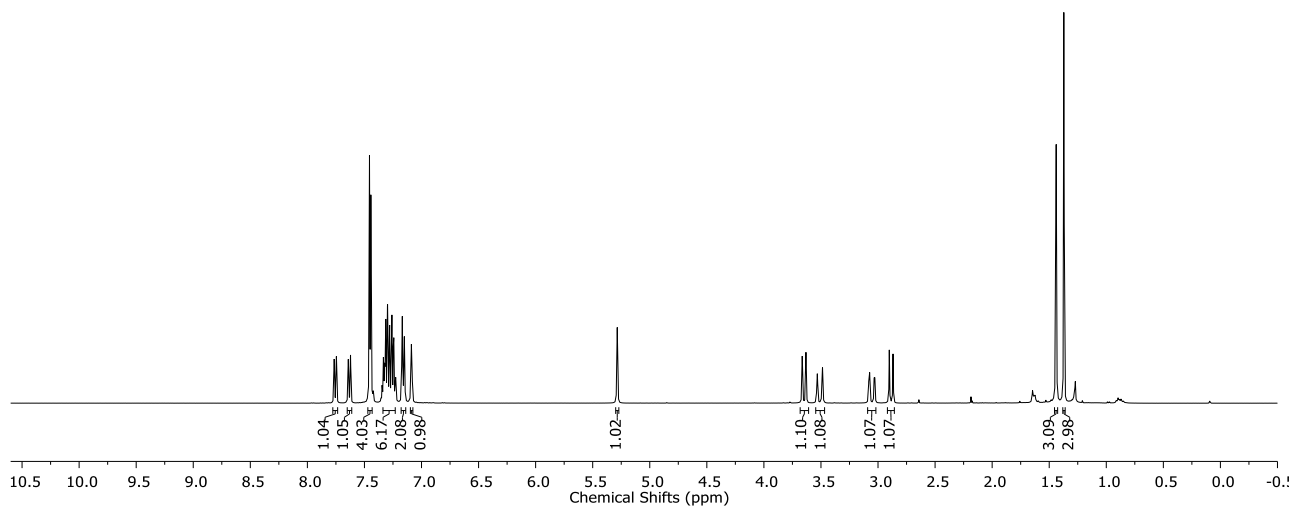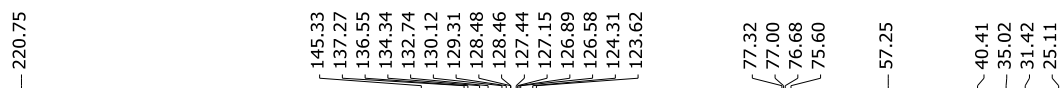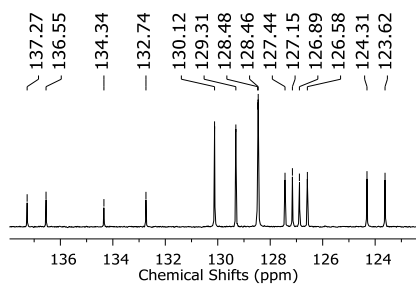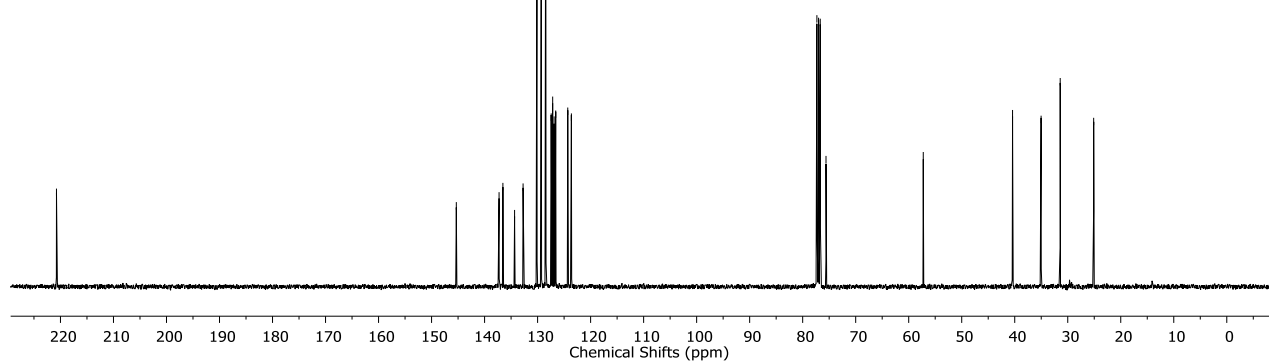

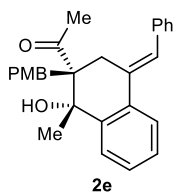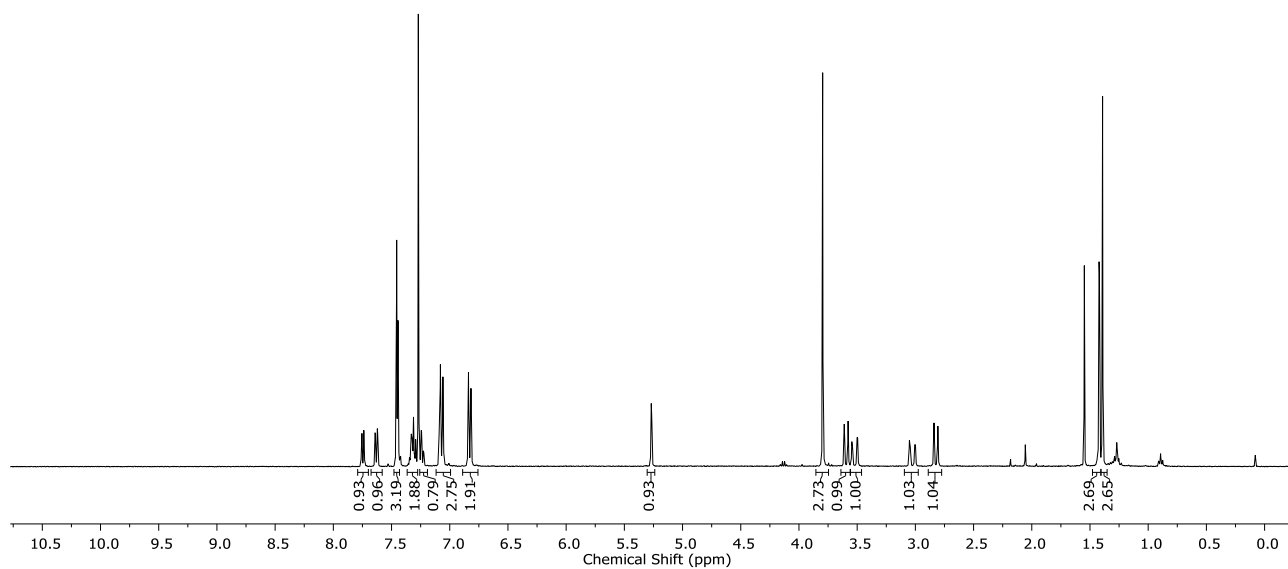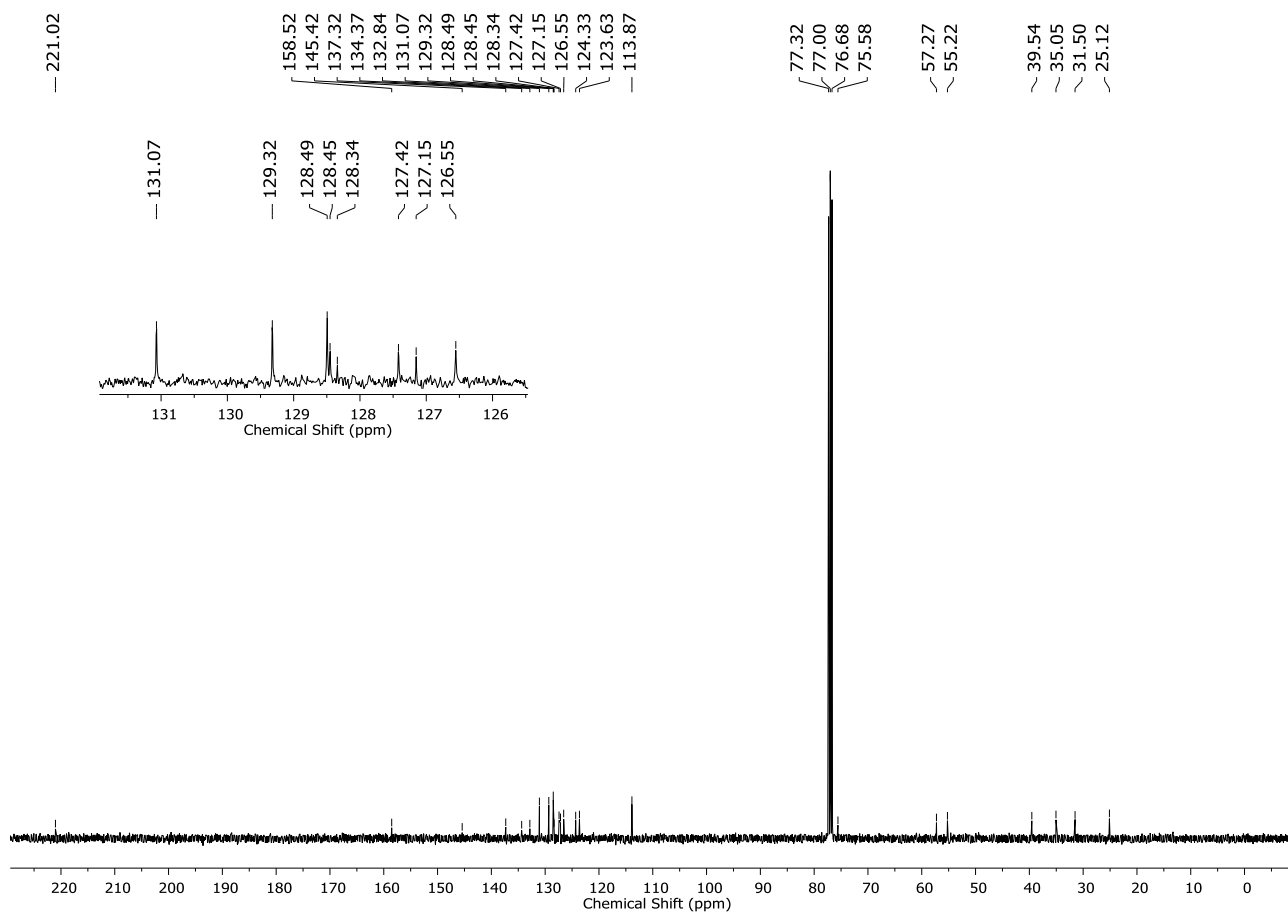

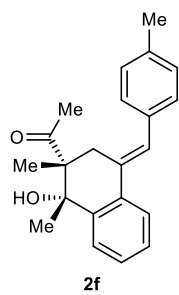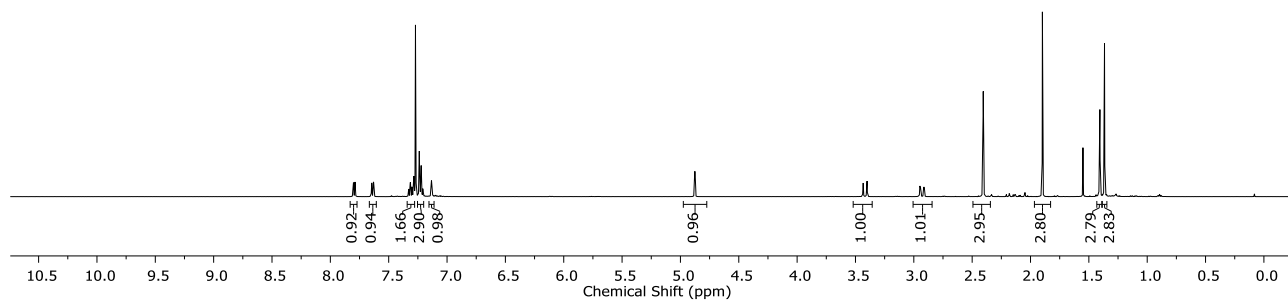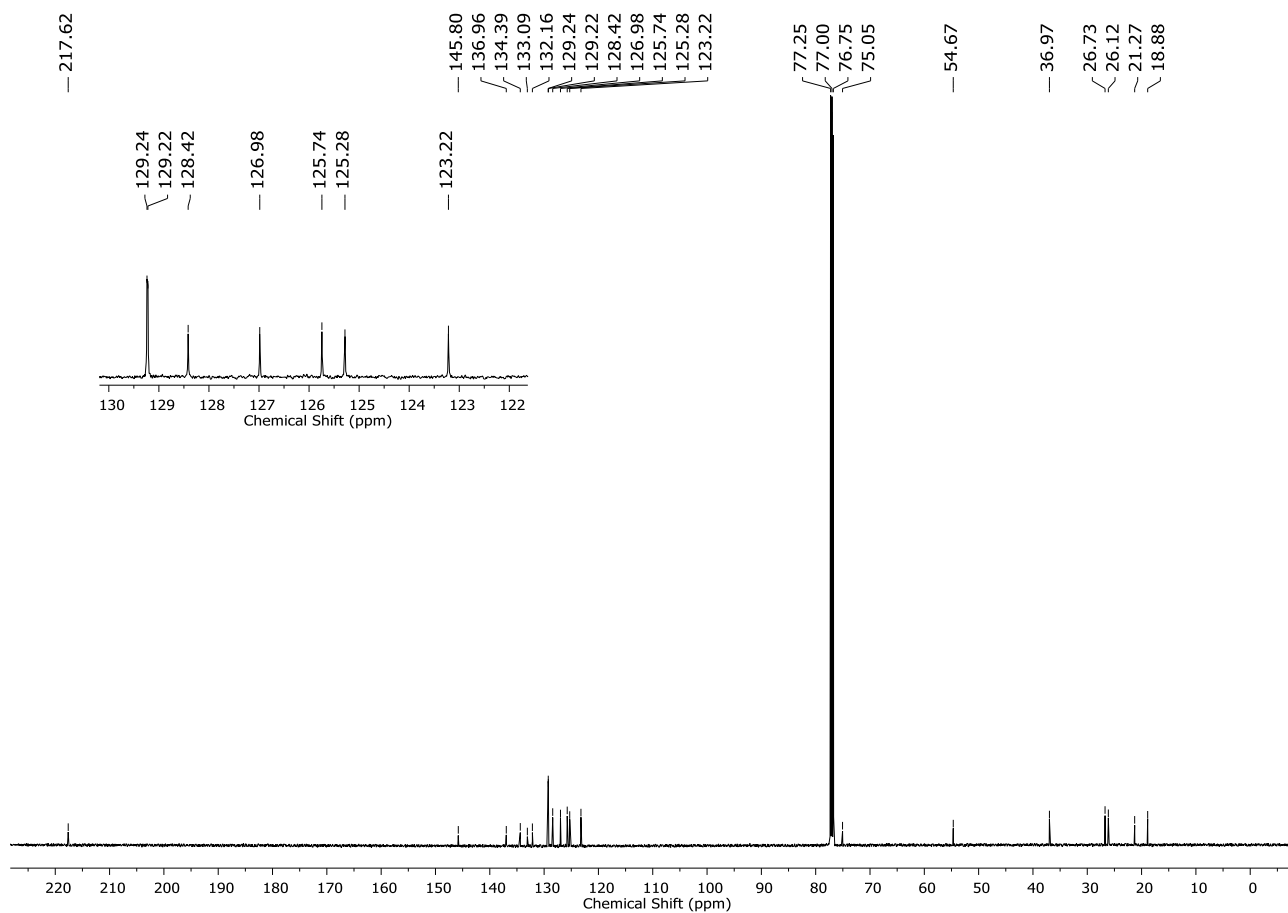

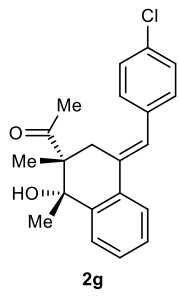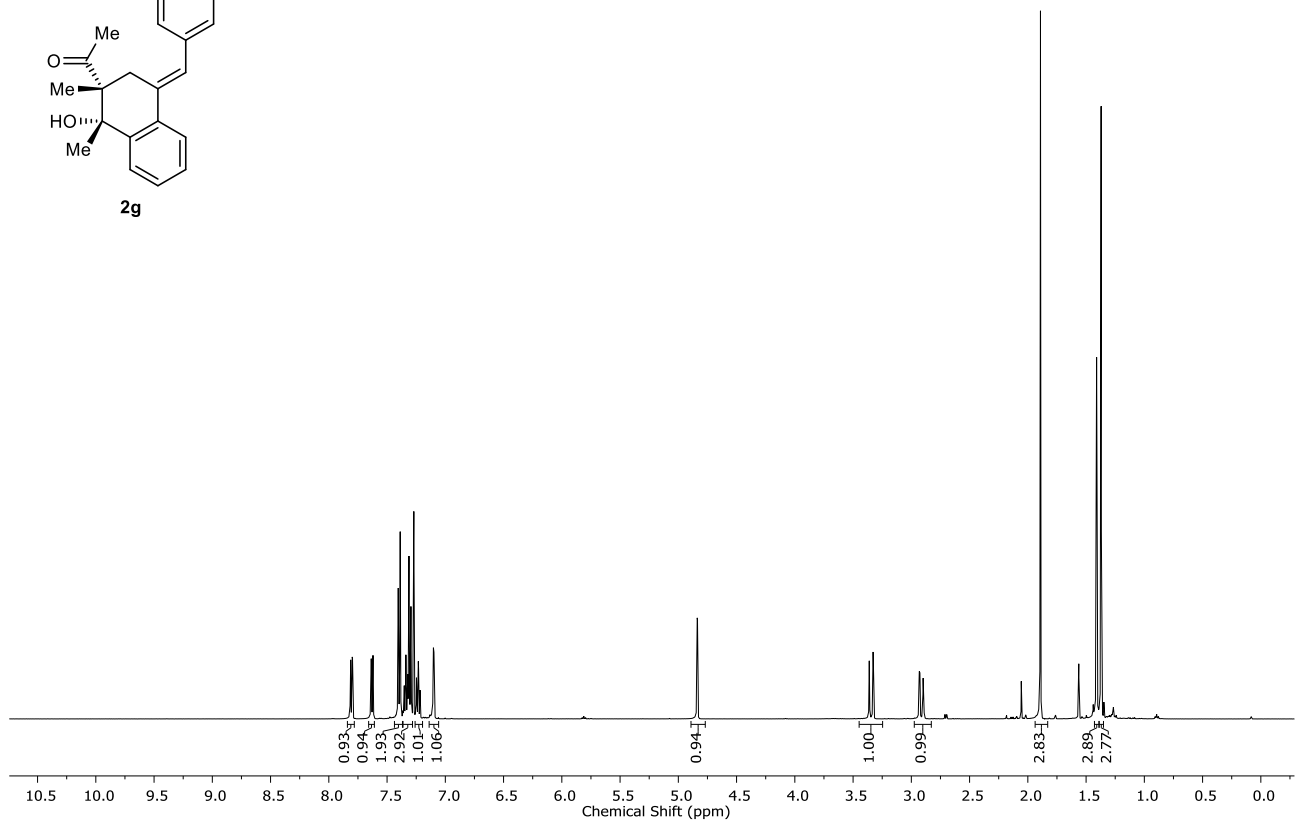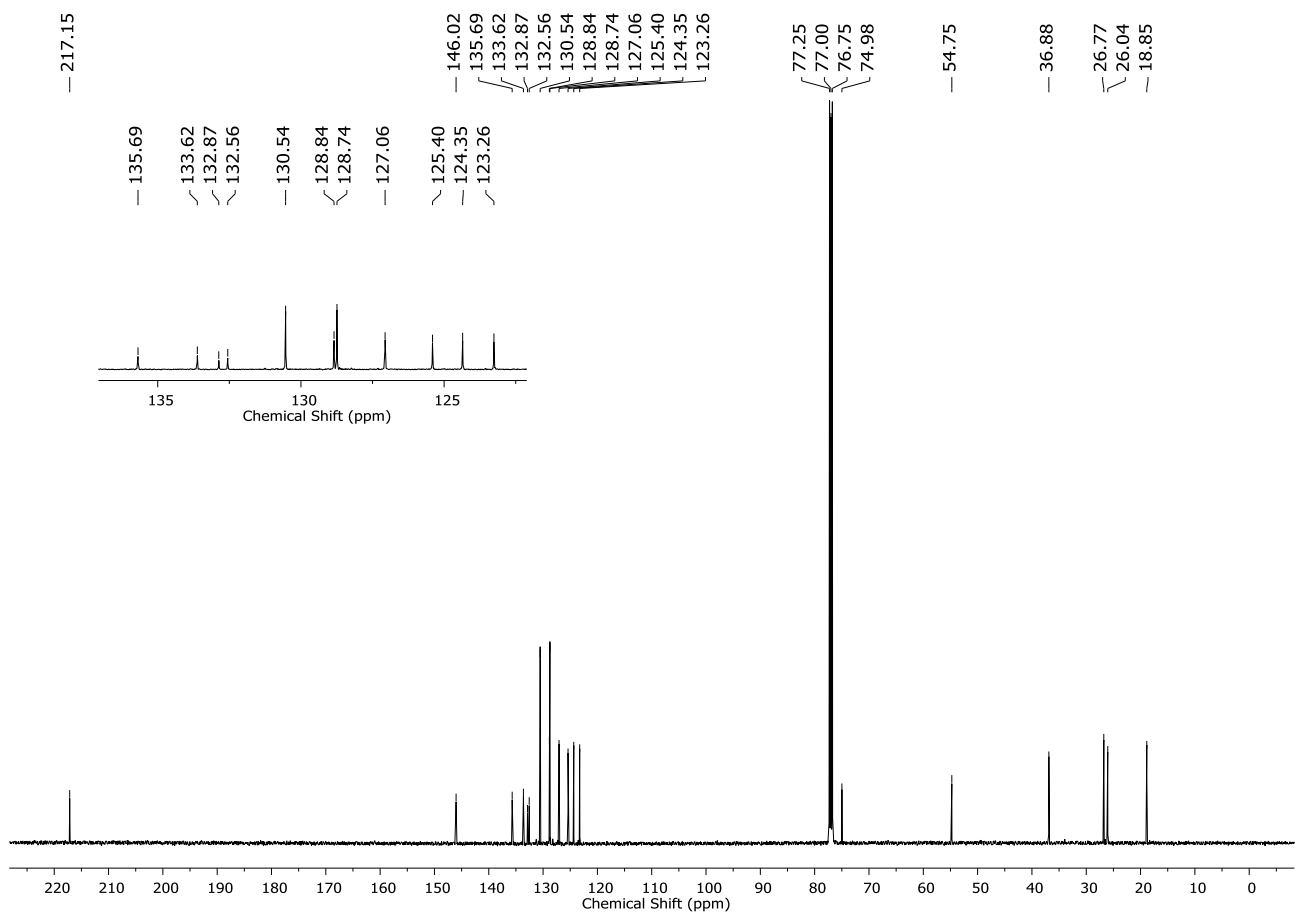



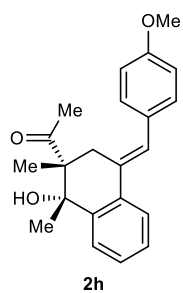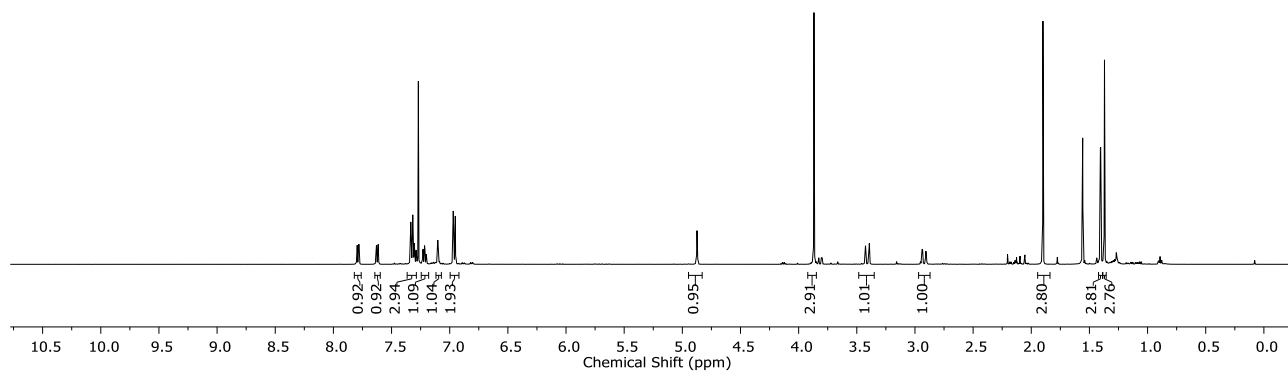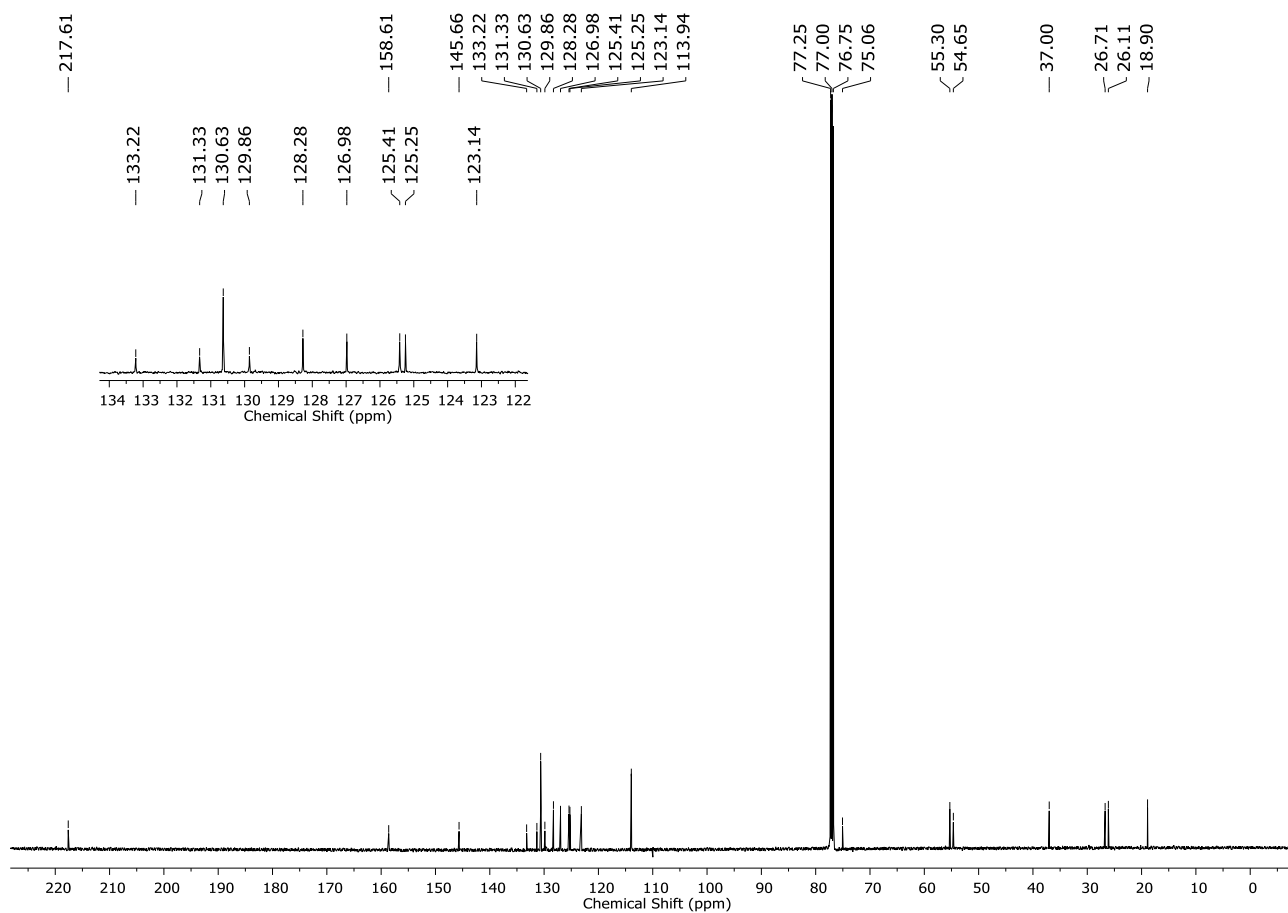

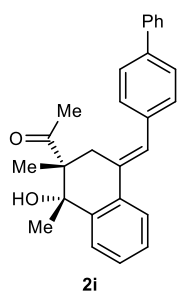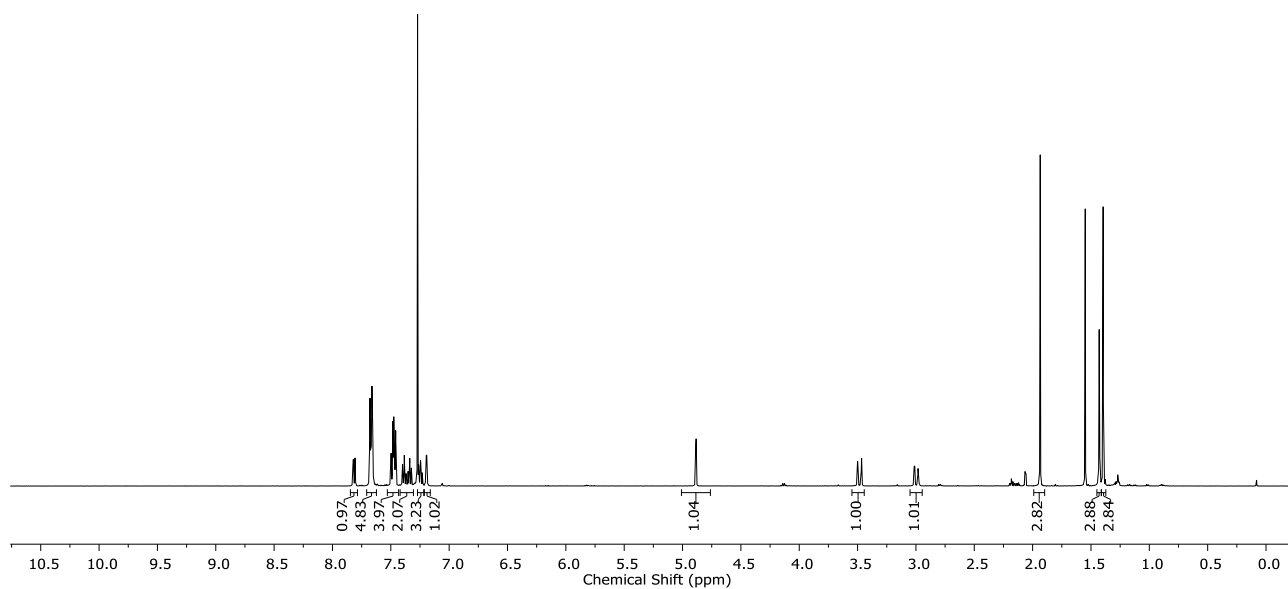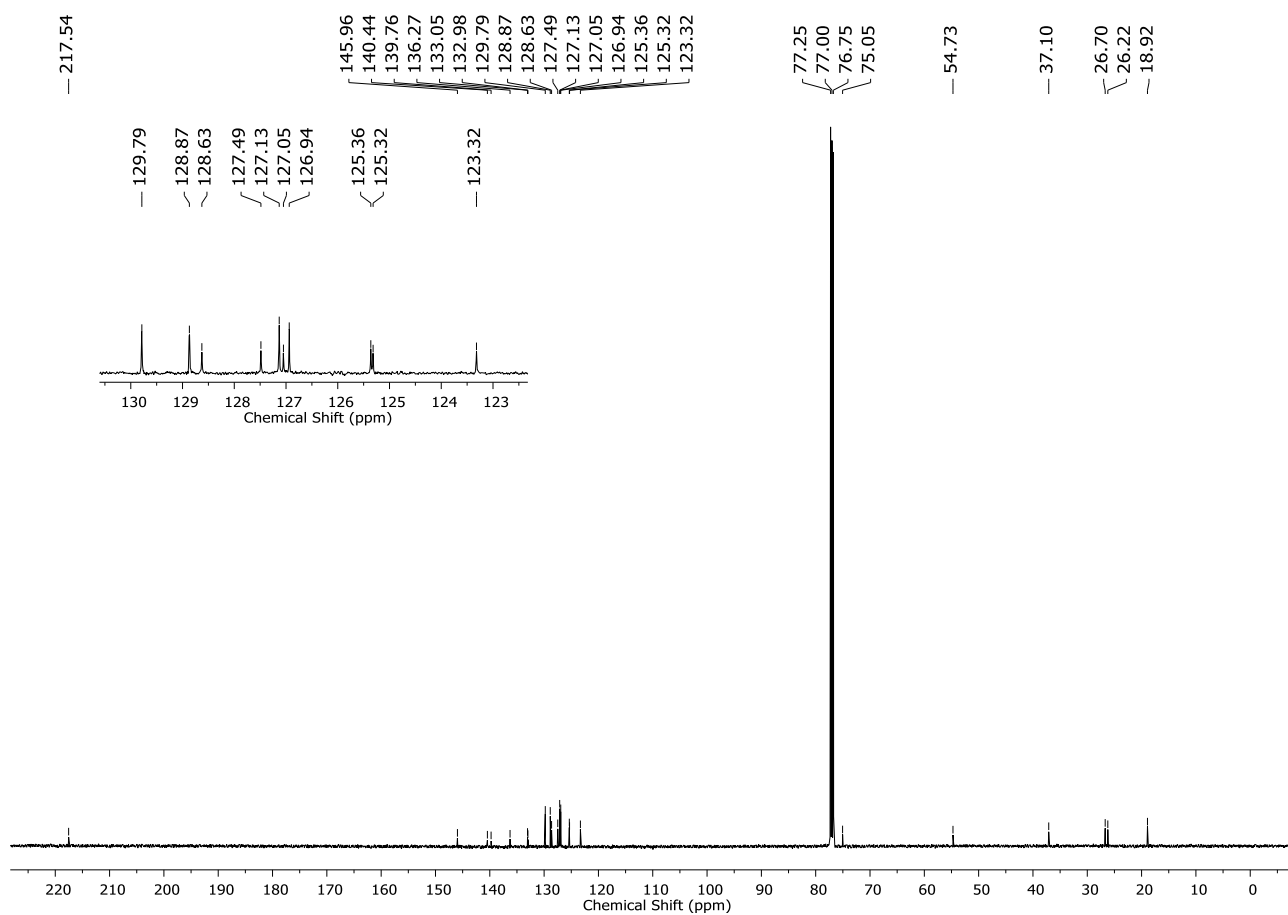

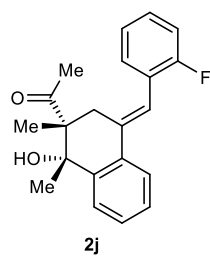

2j

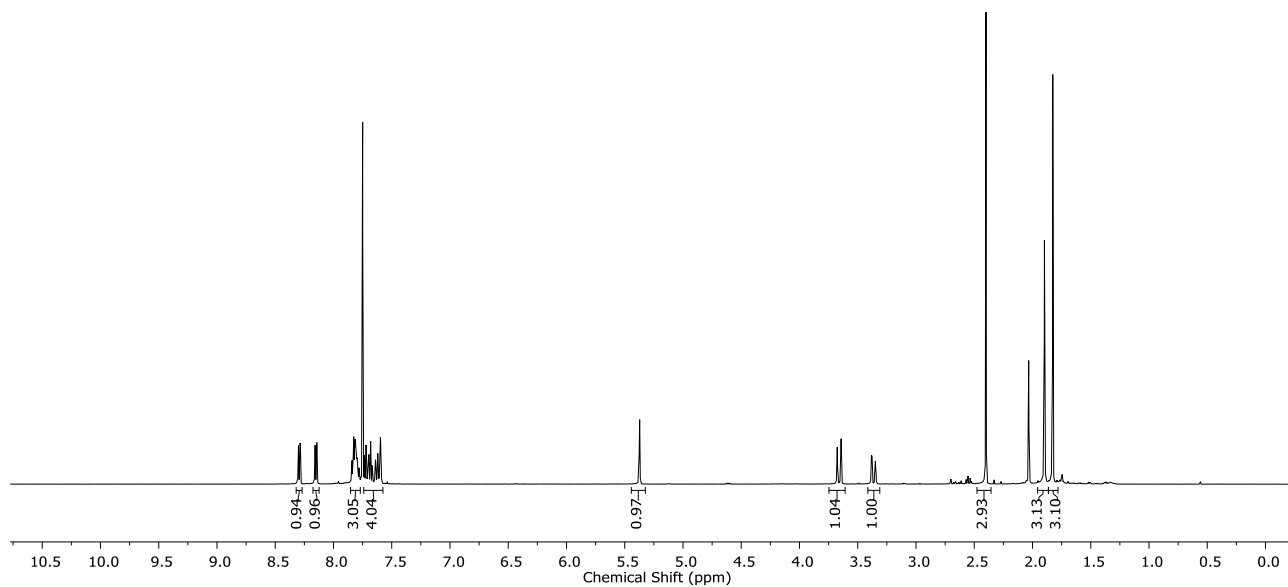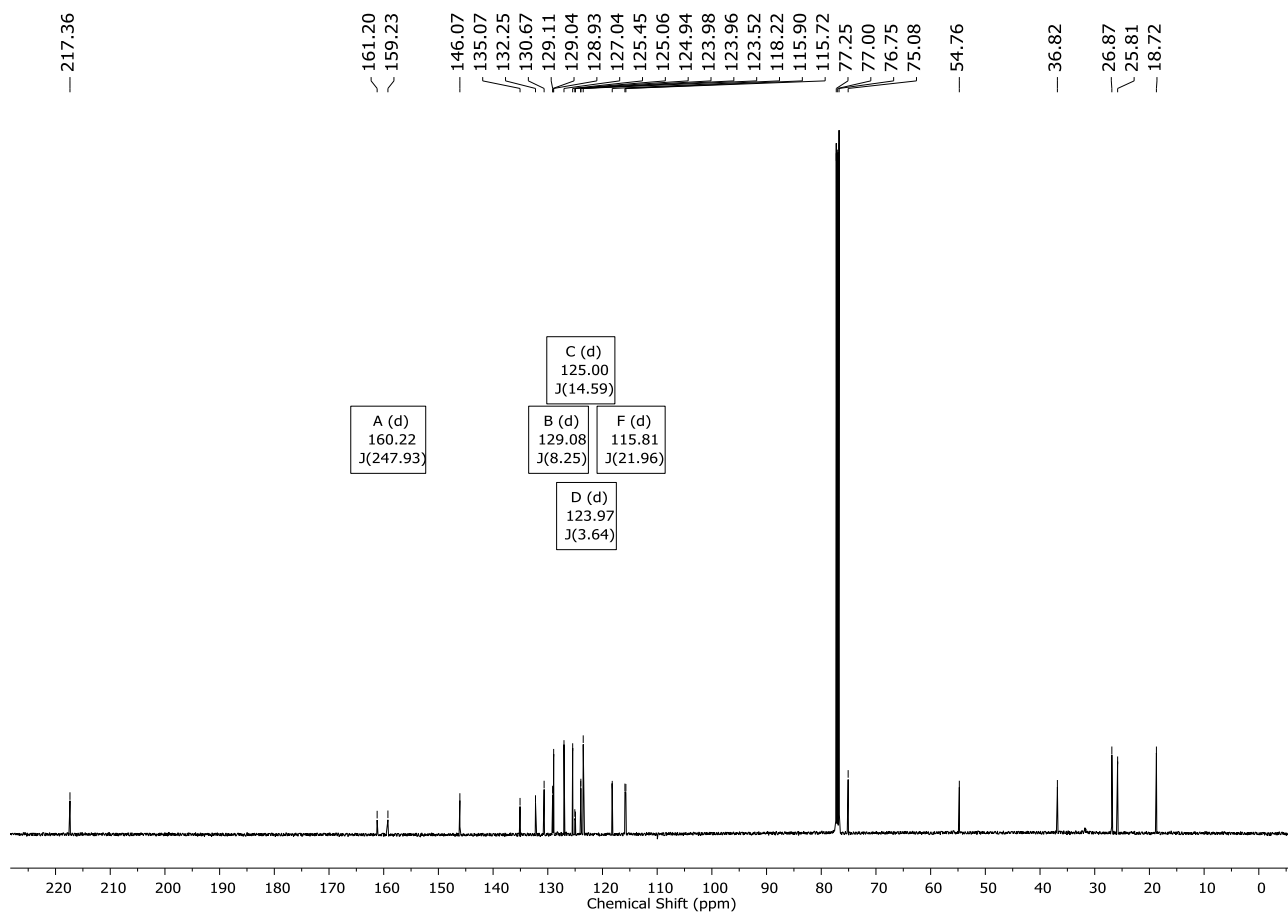

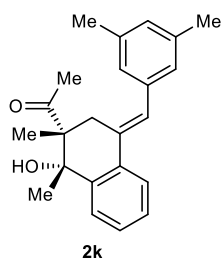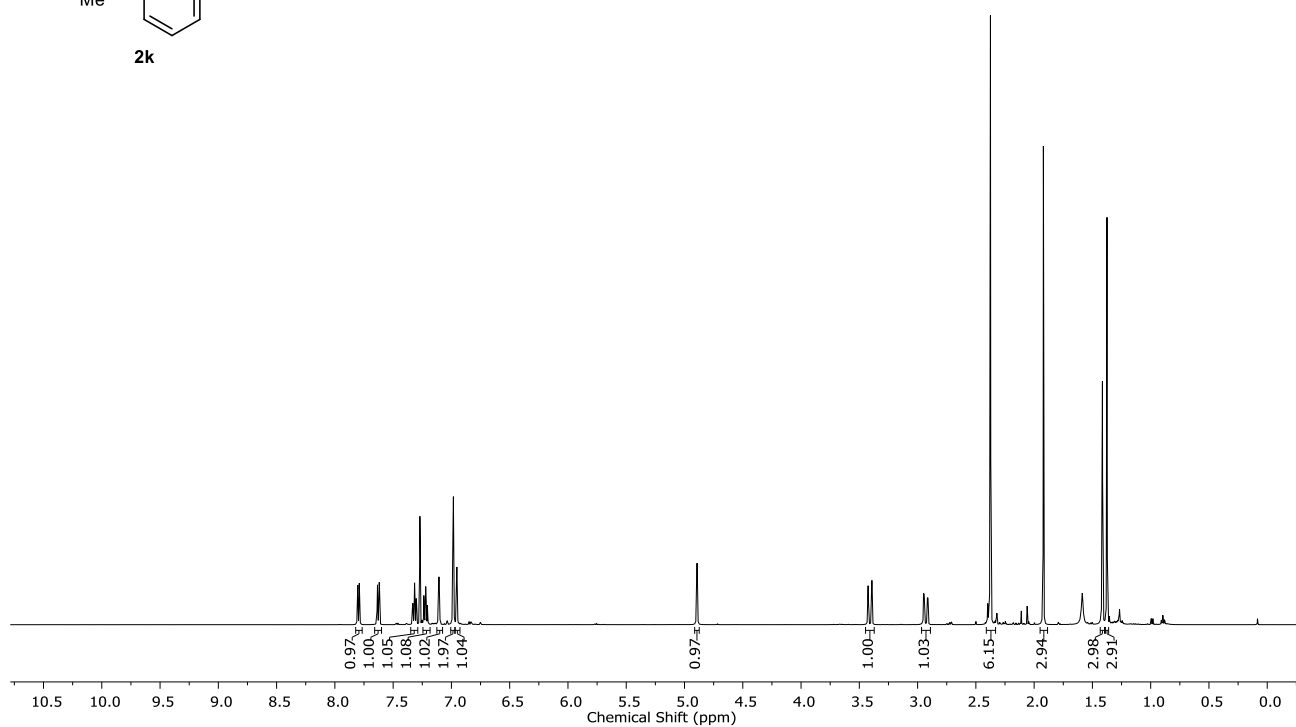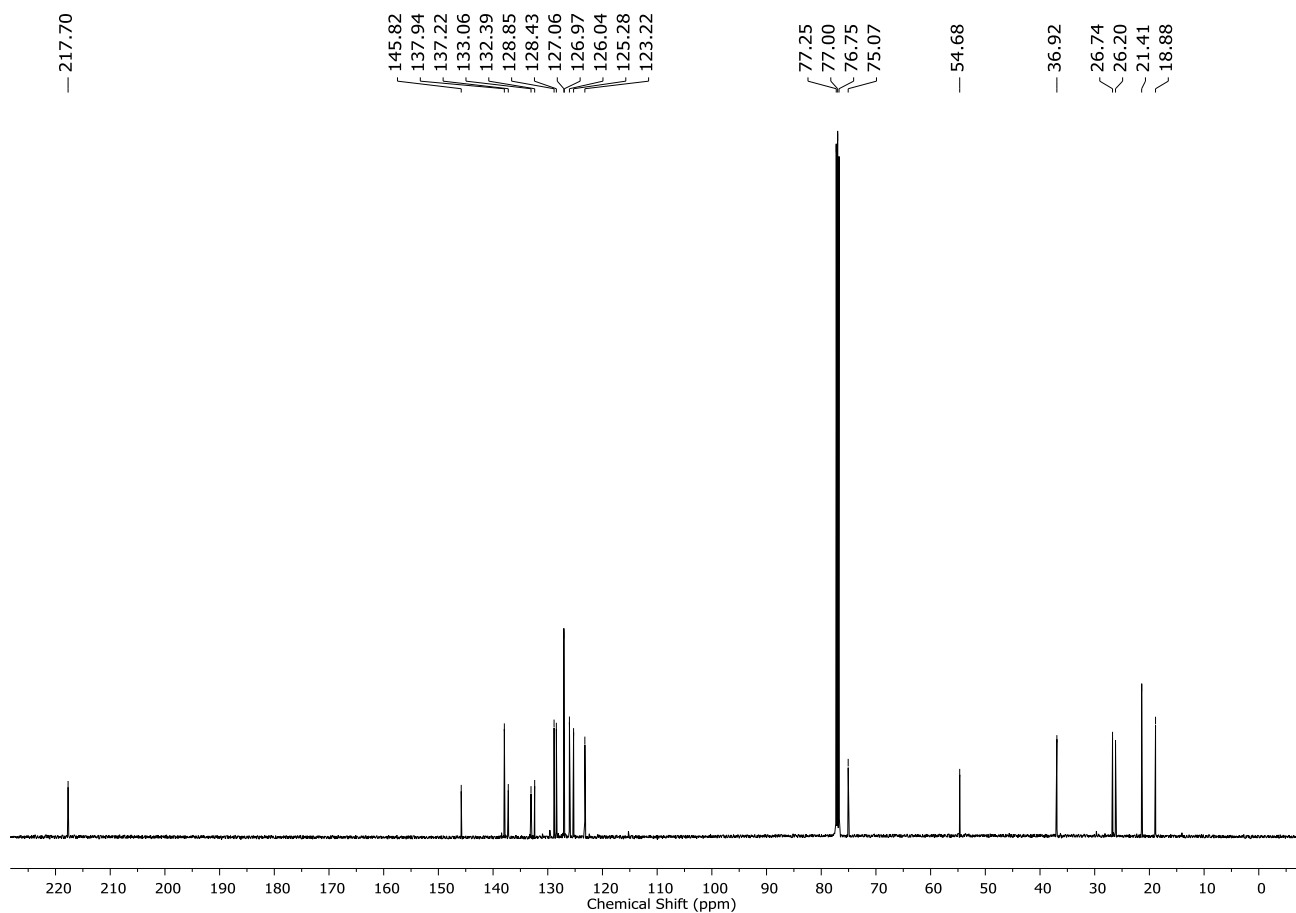

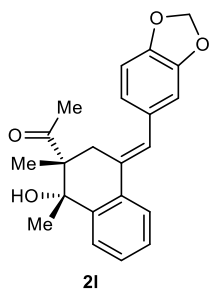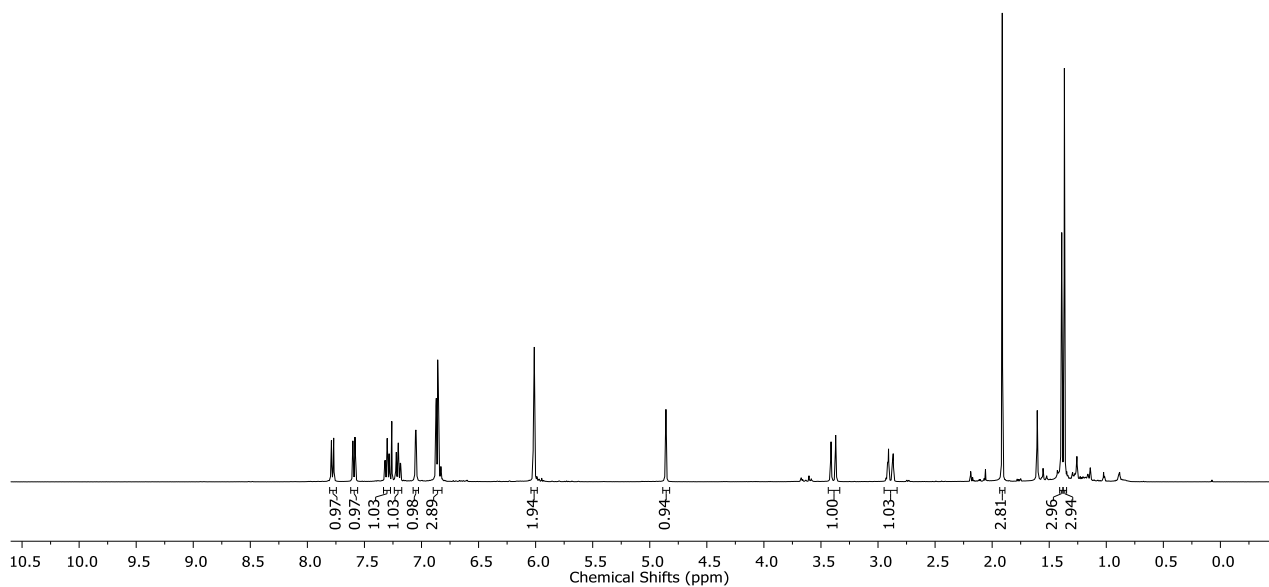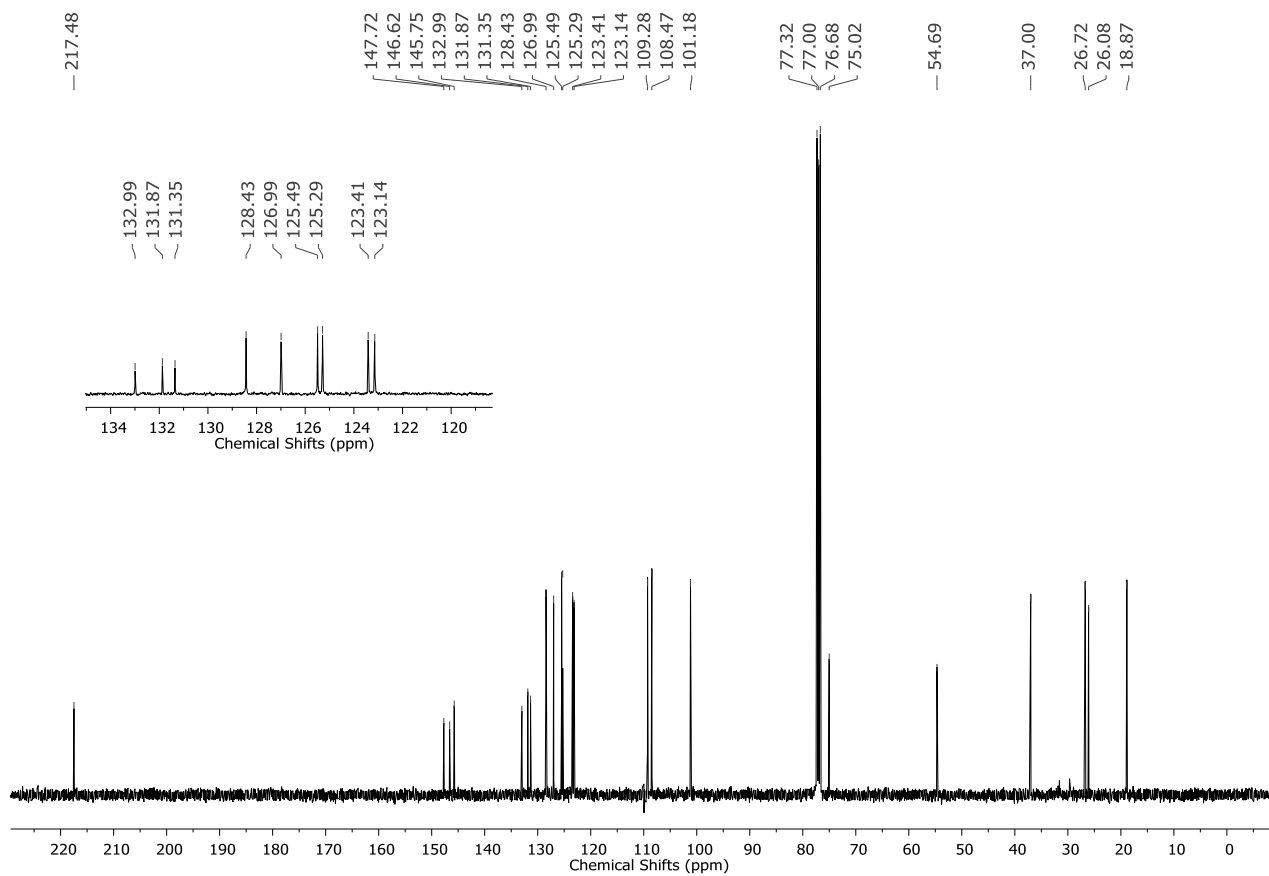

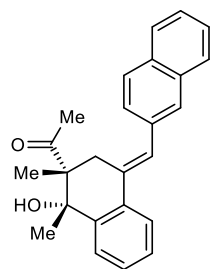

2m

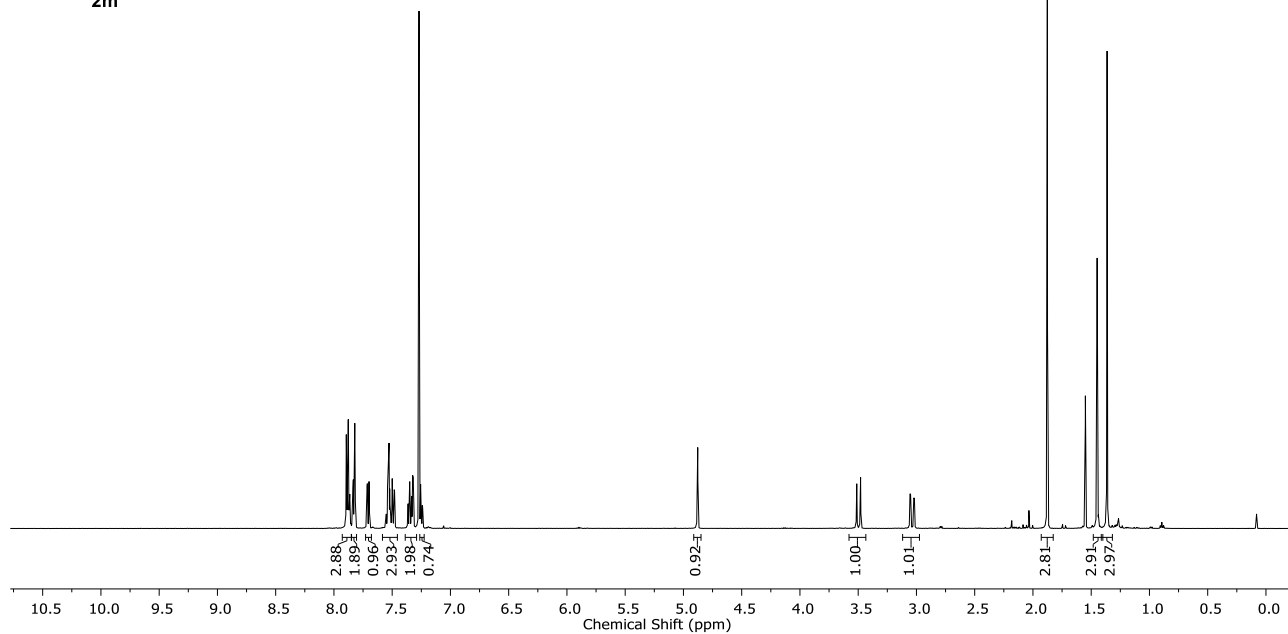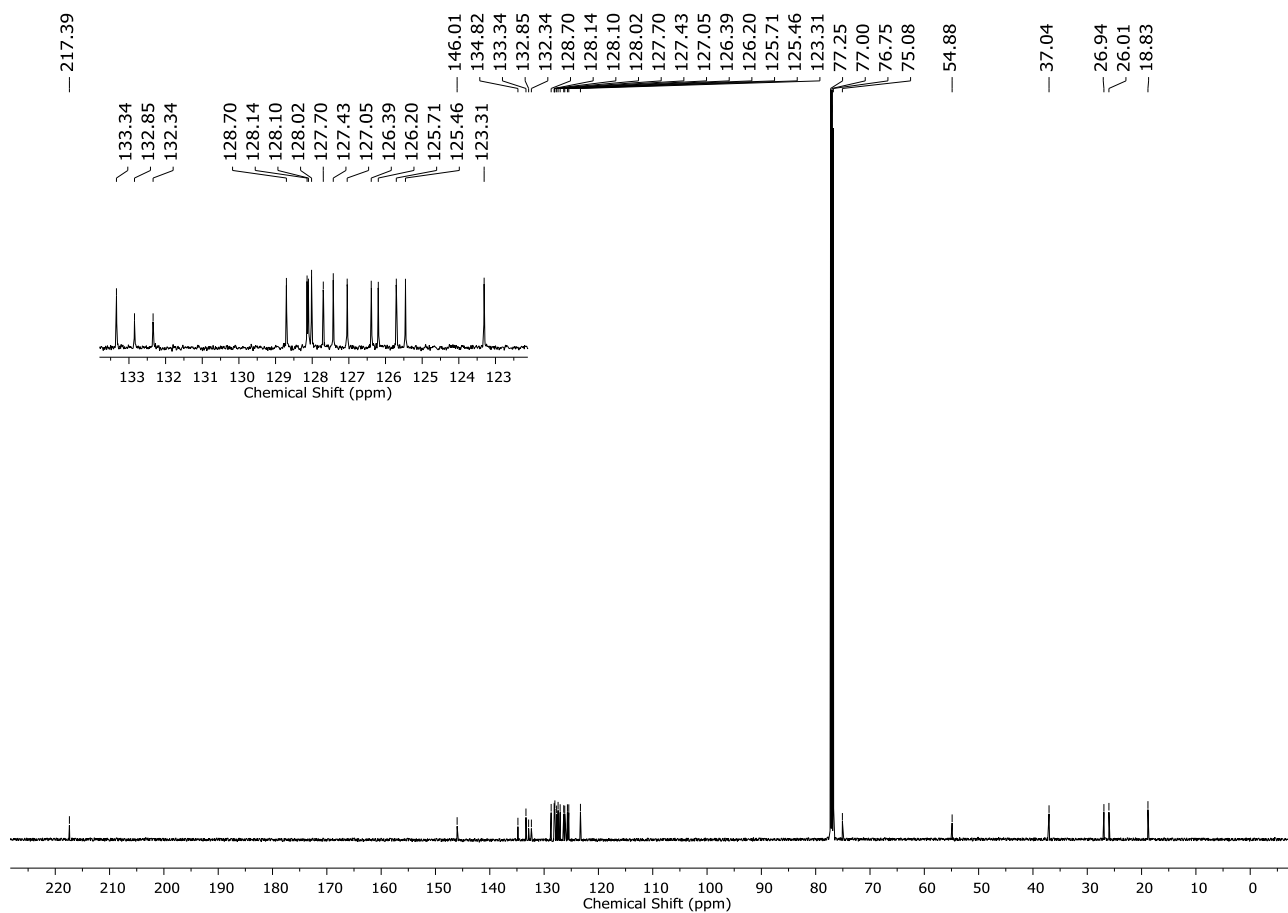

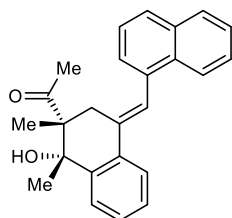

2n

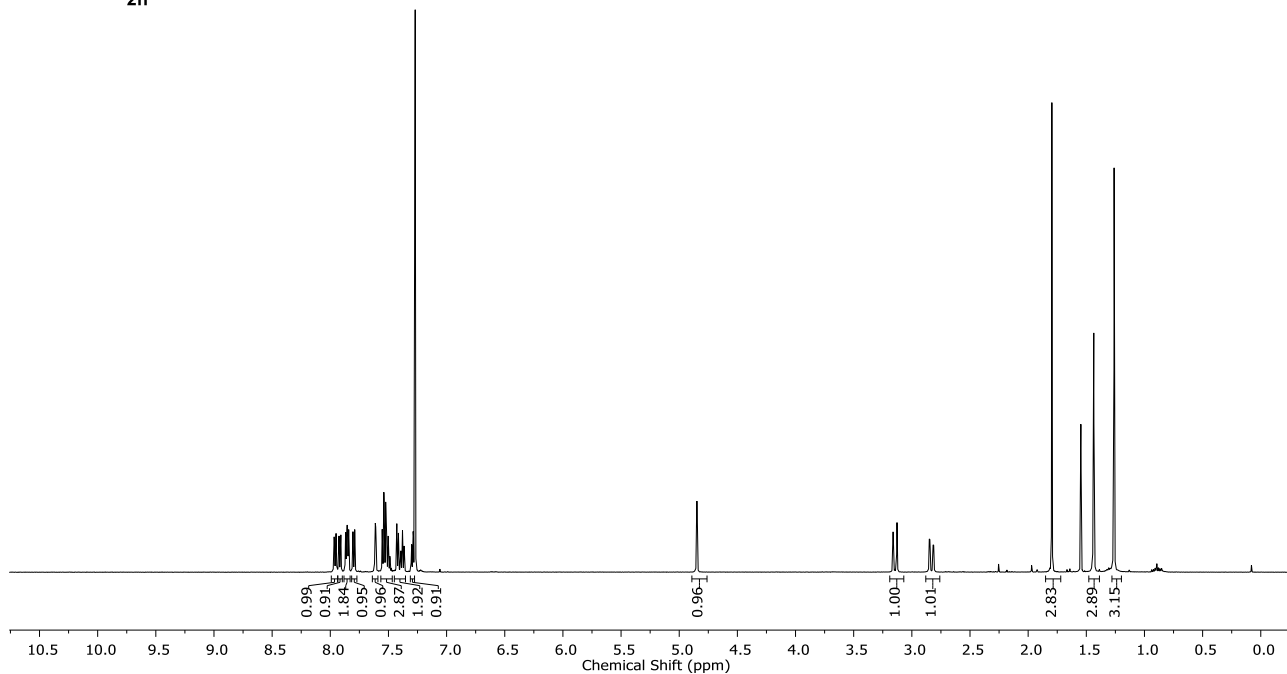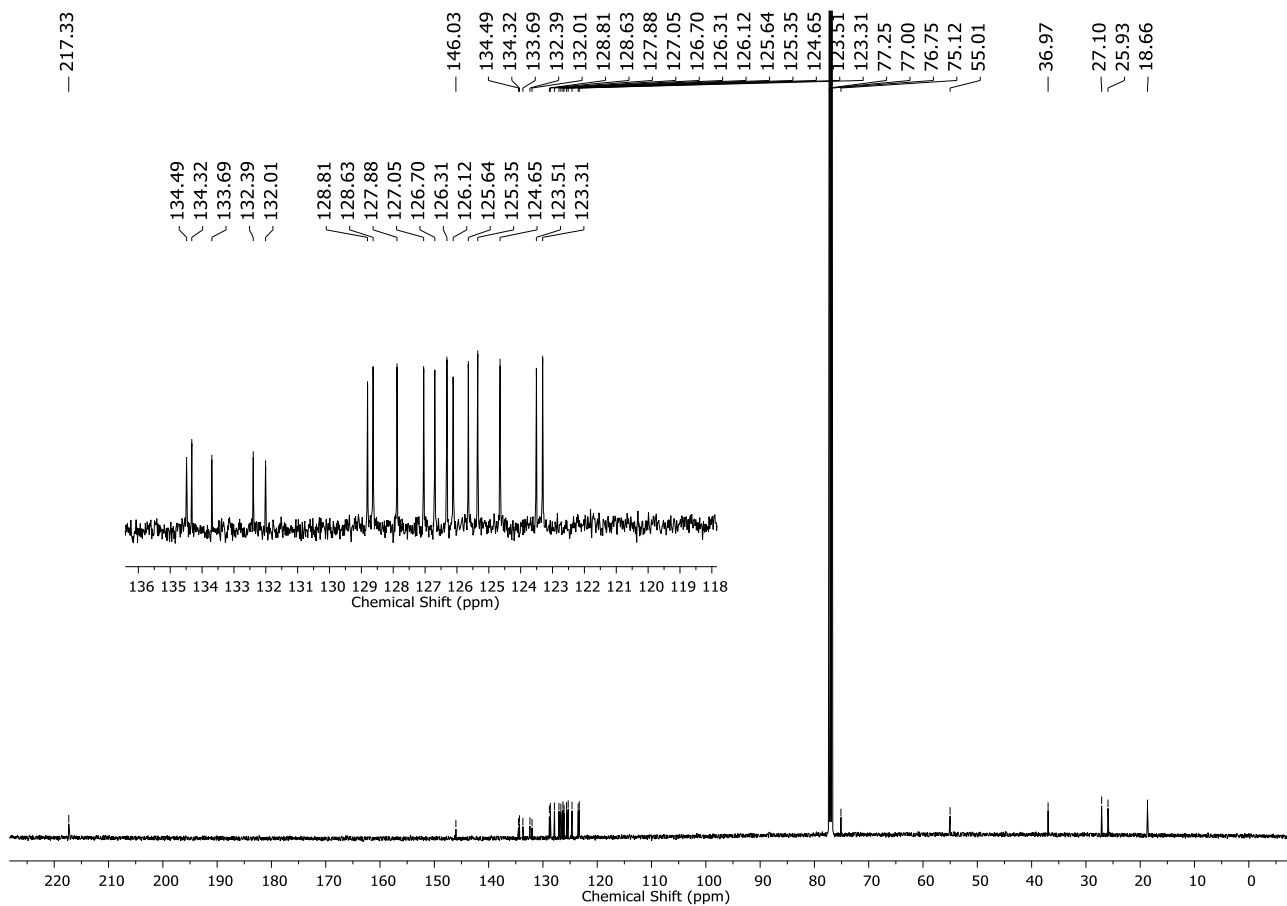

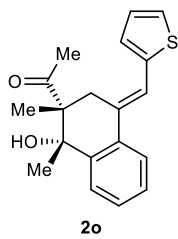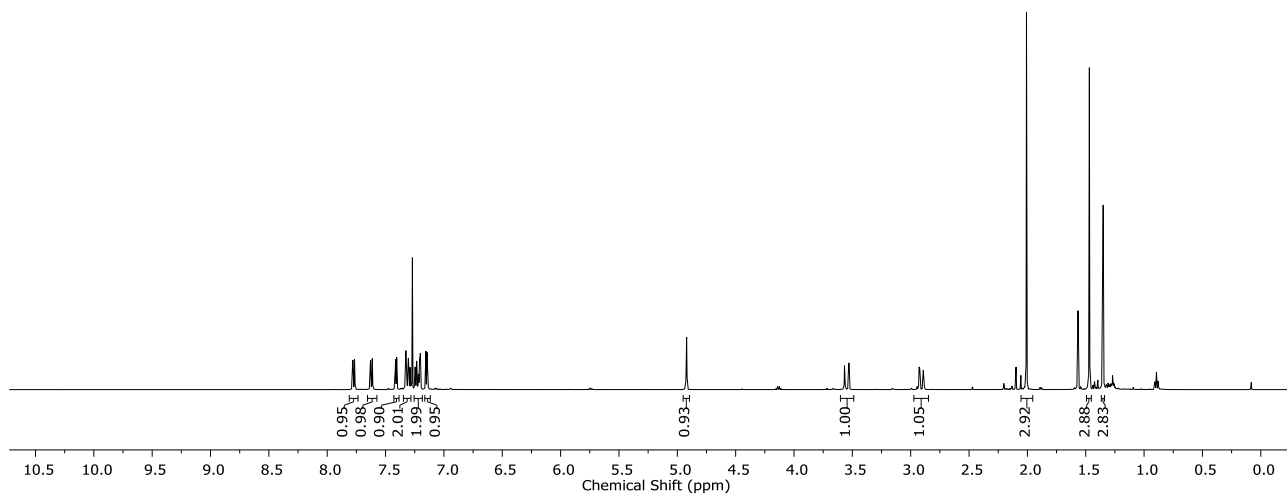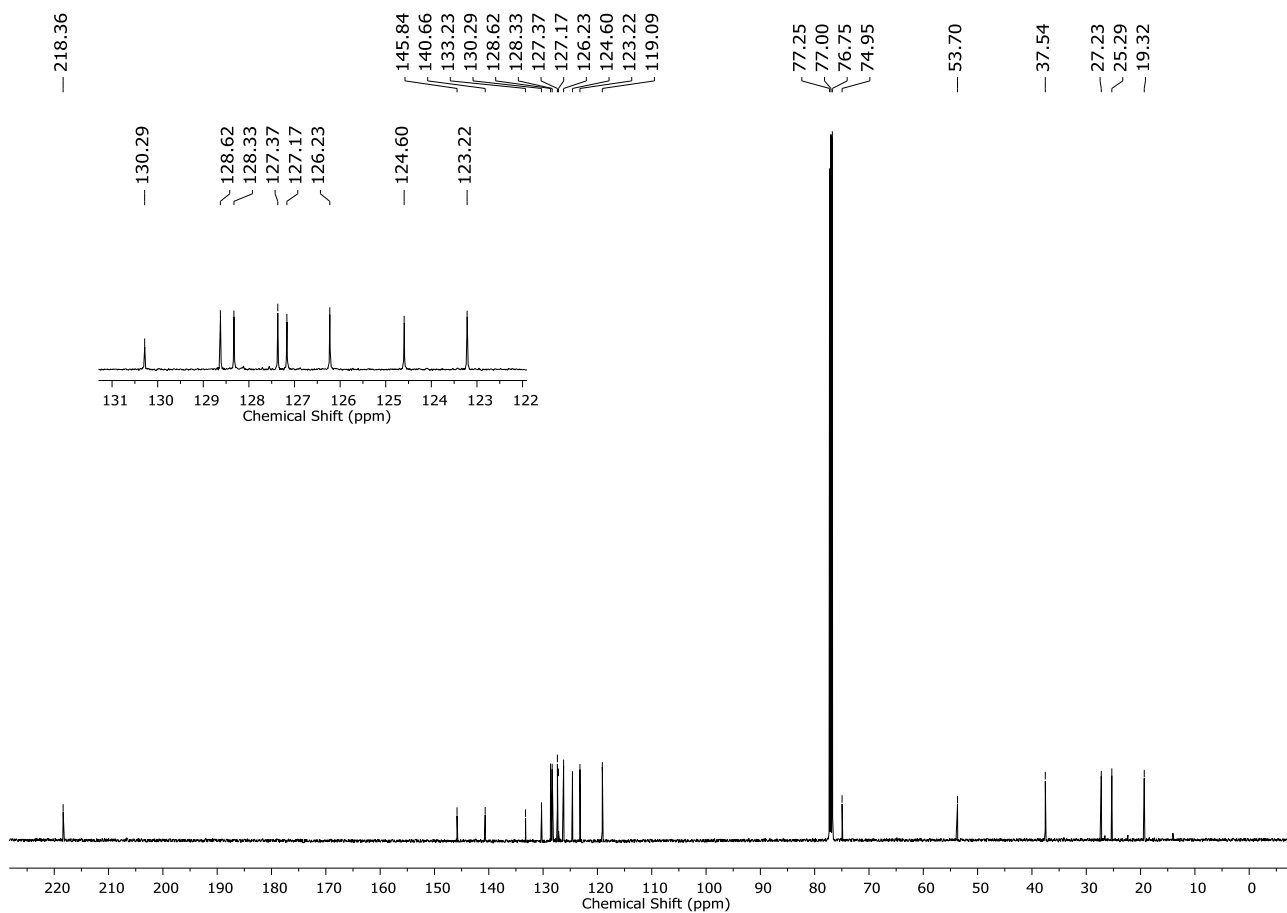



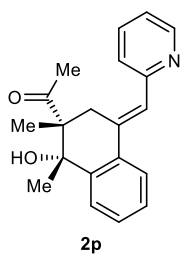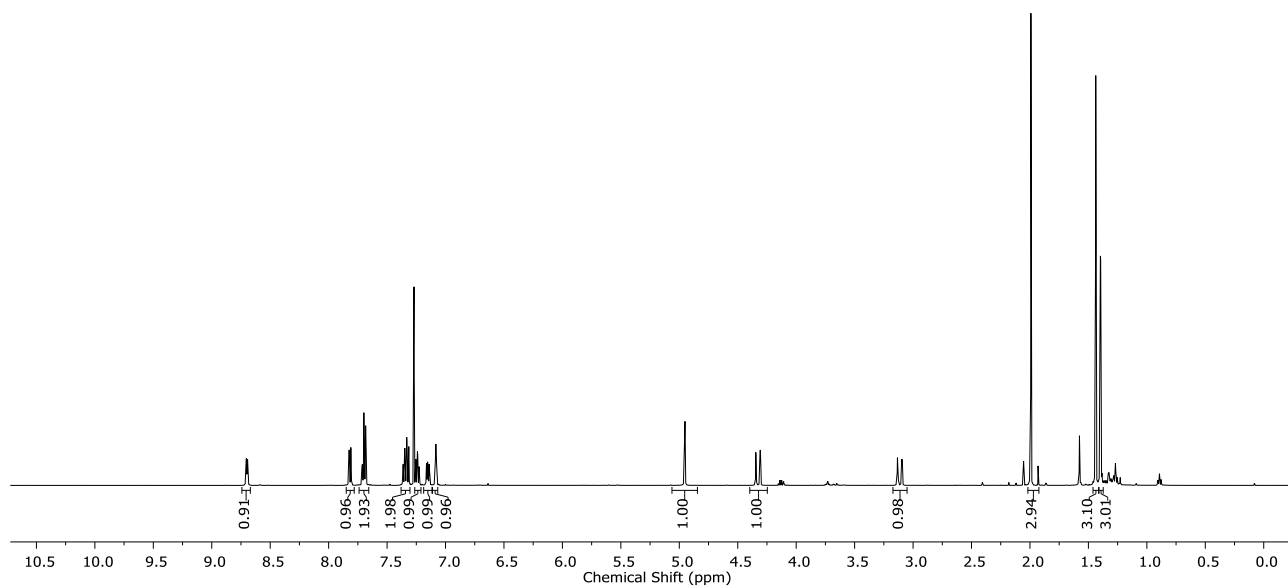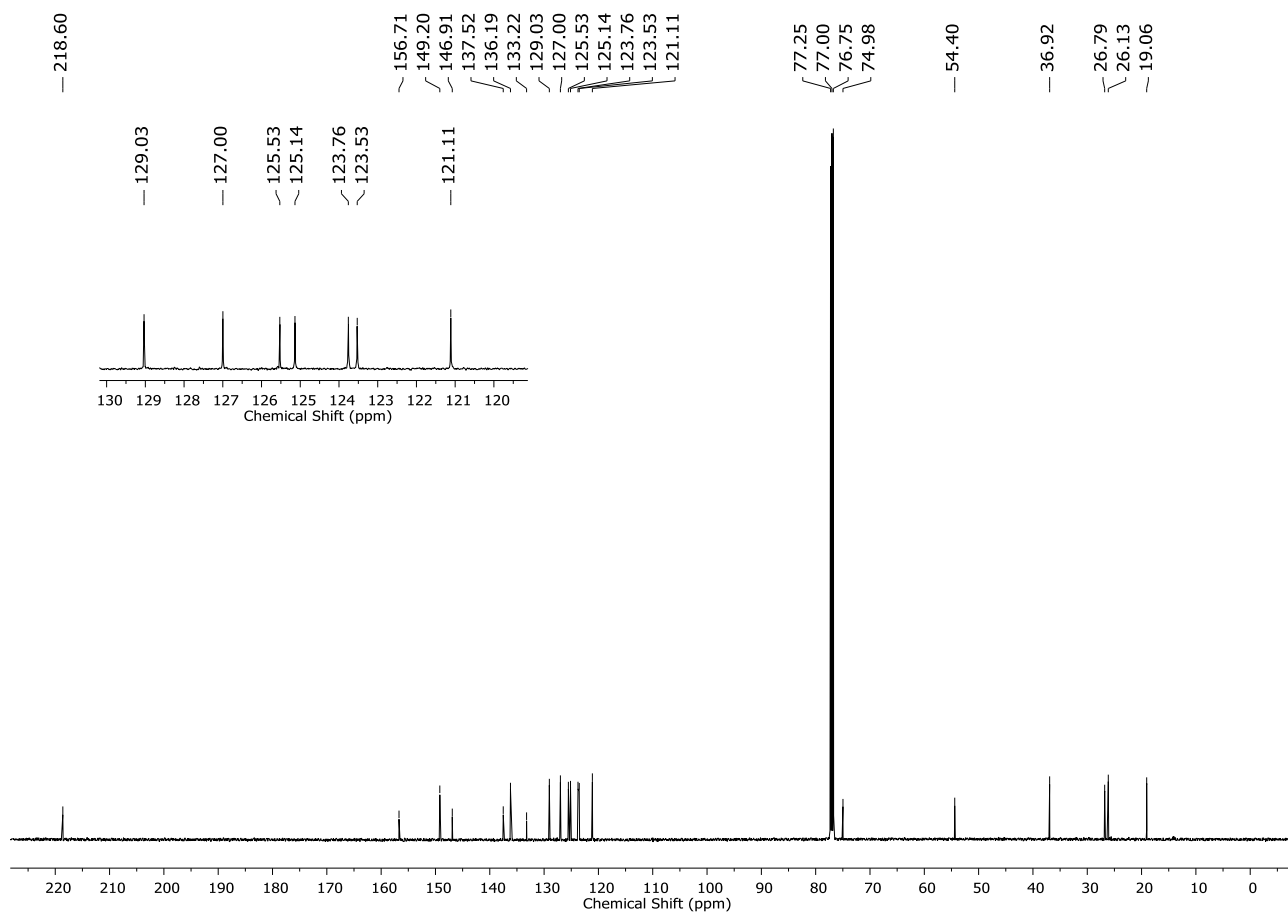

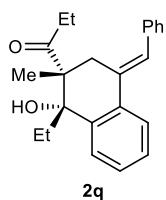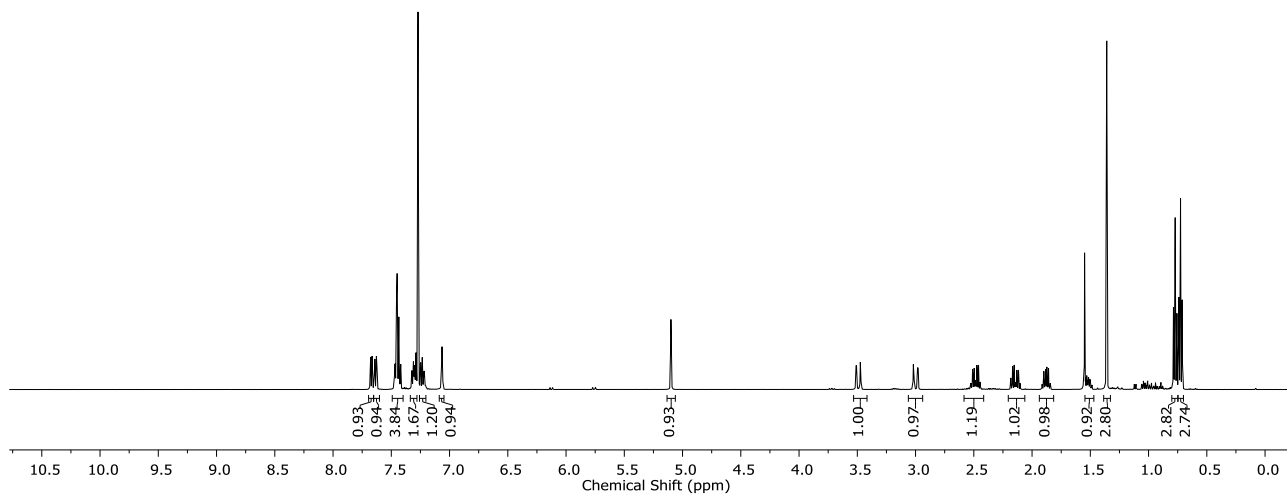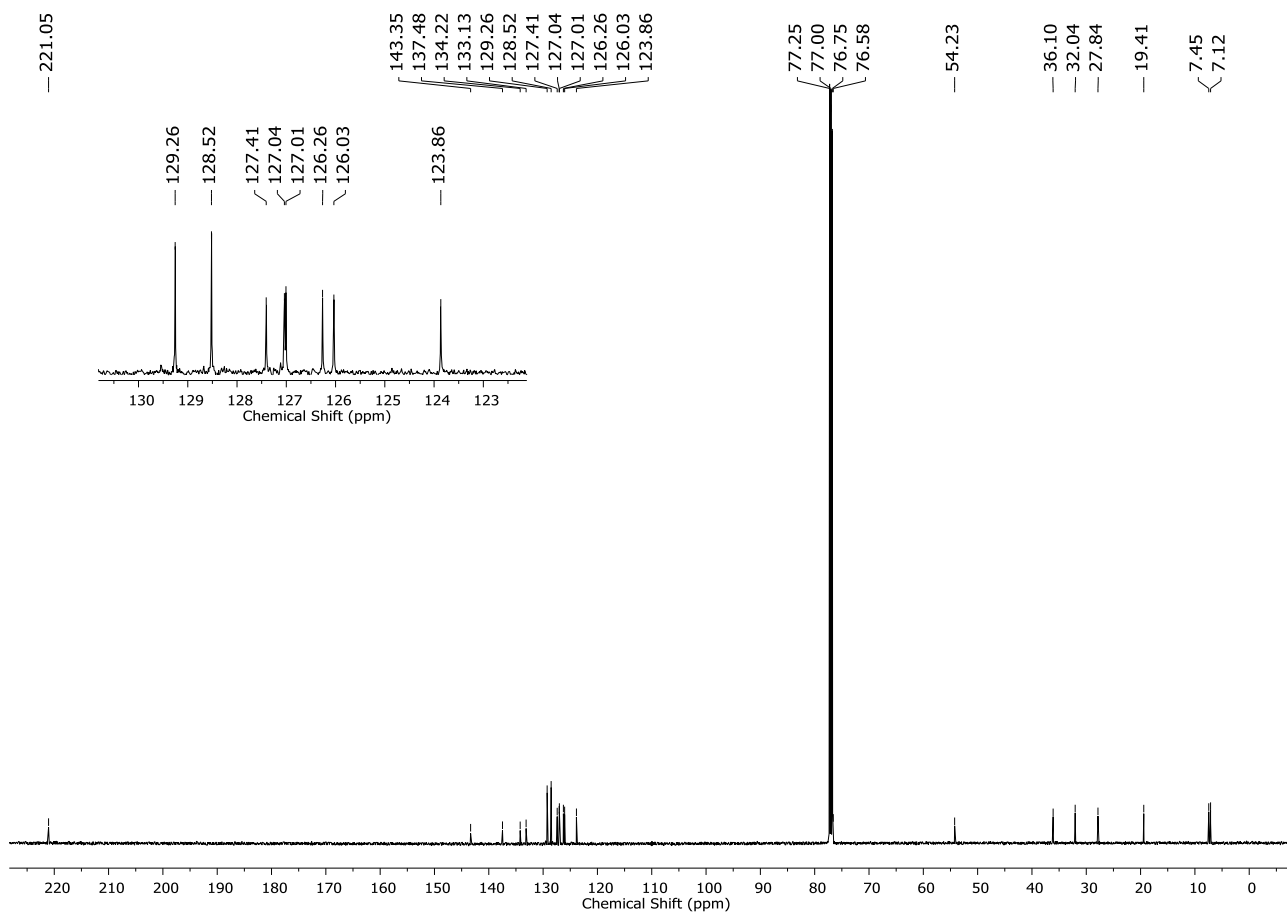

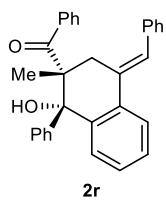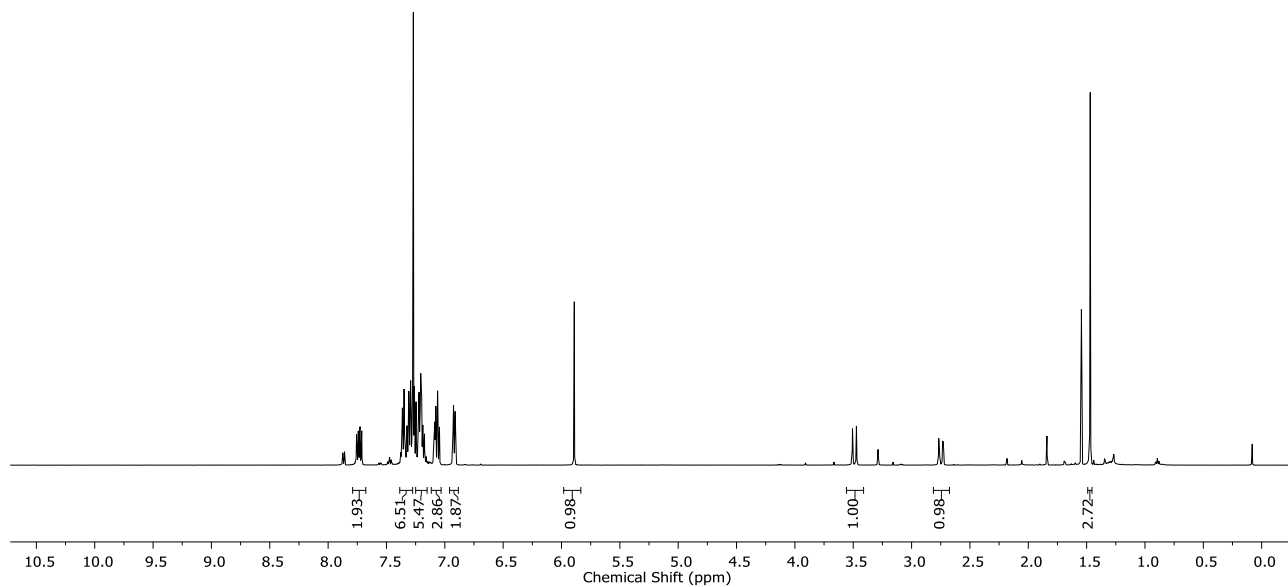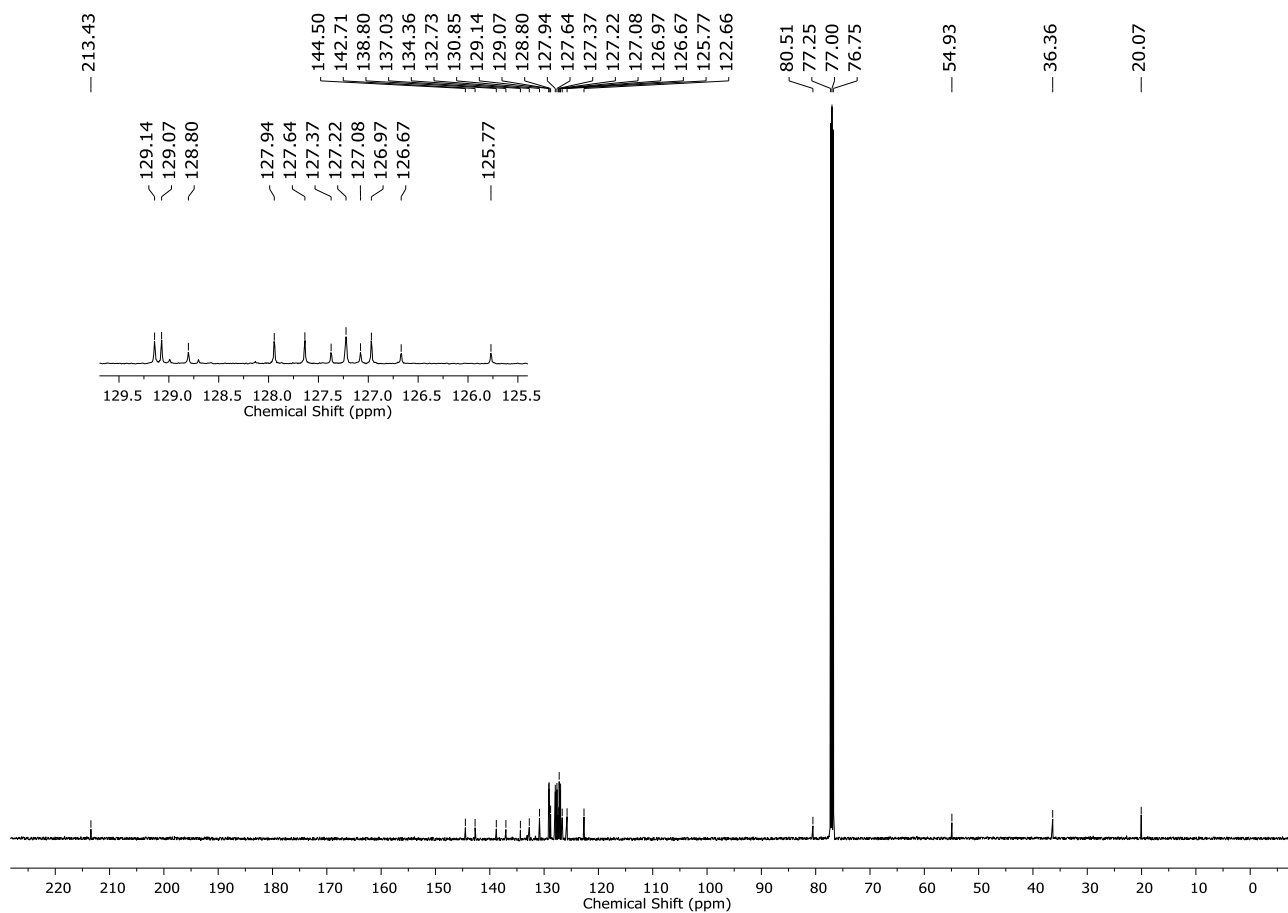

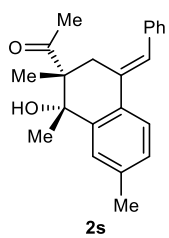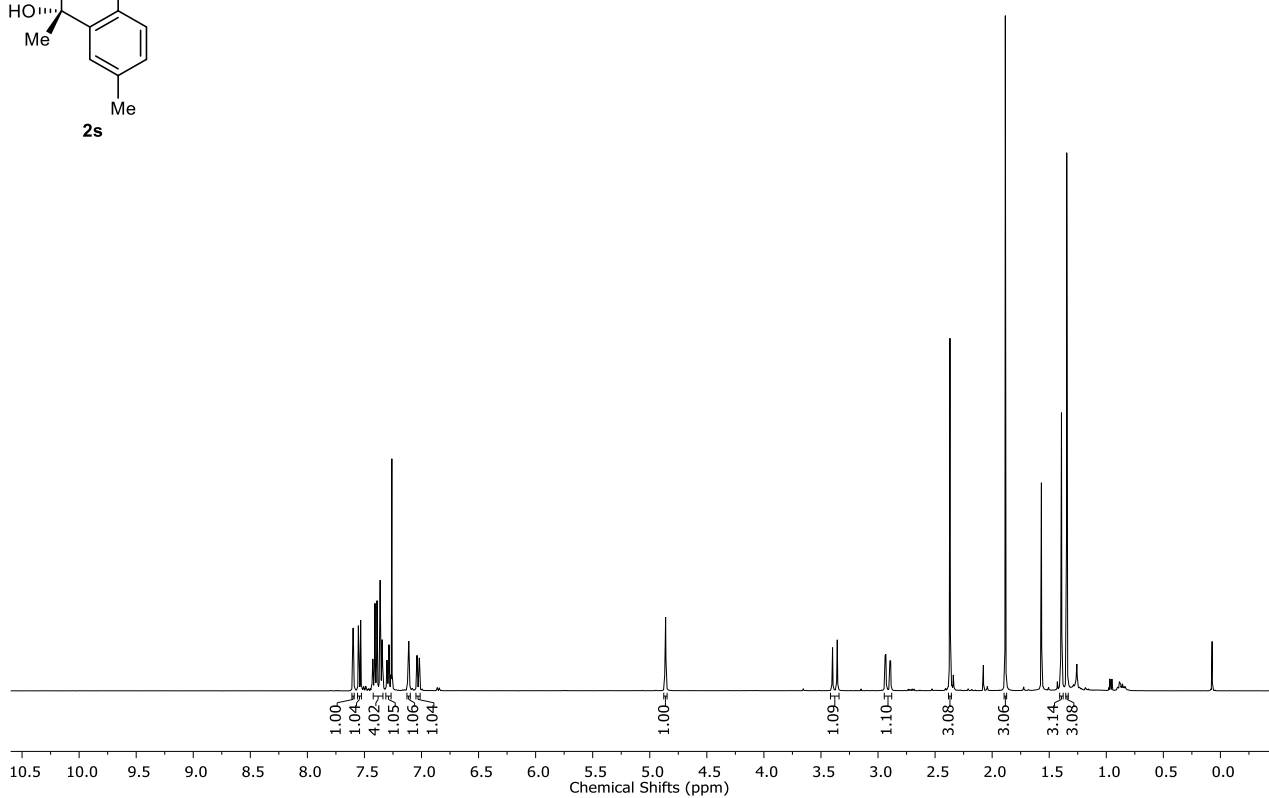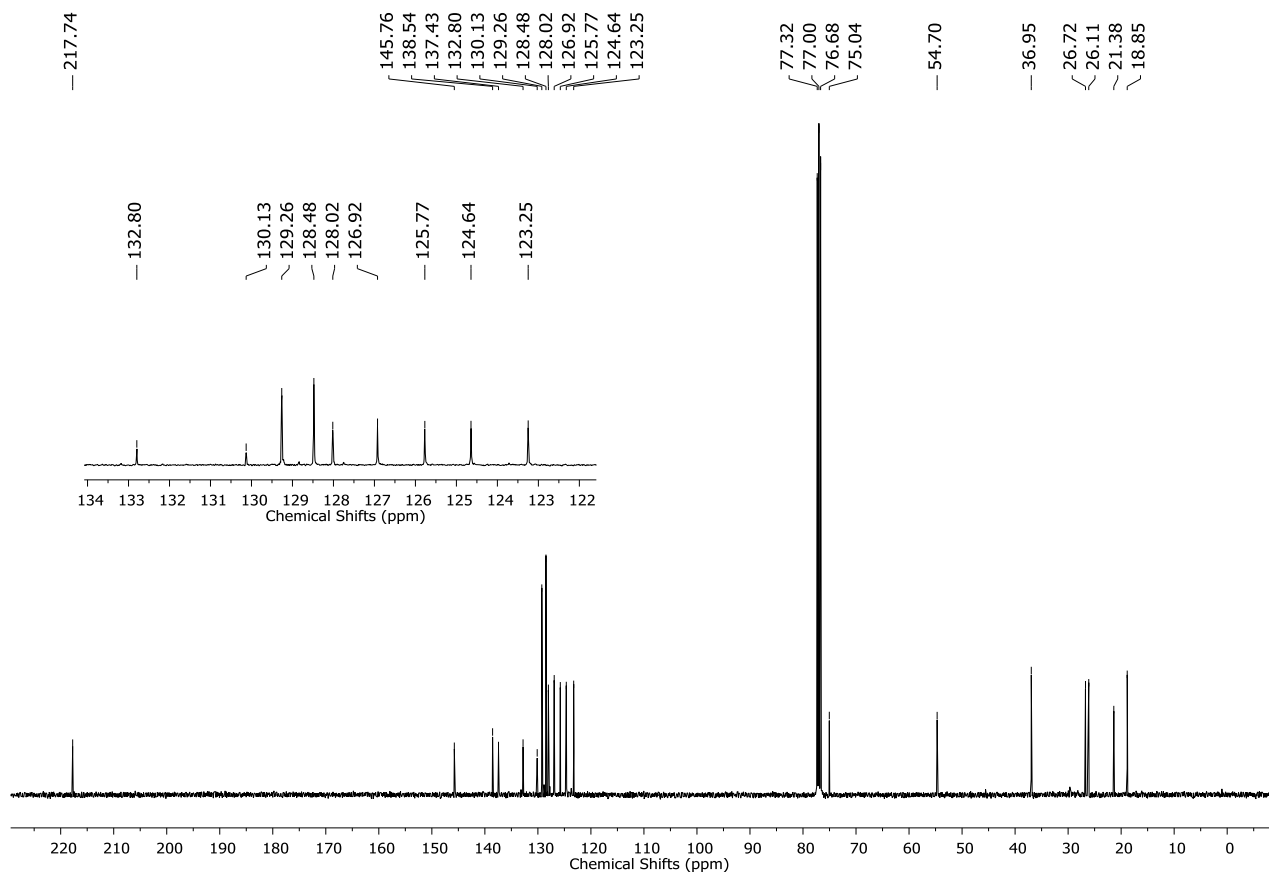

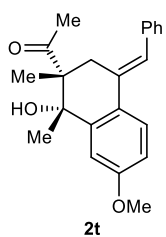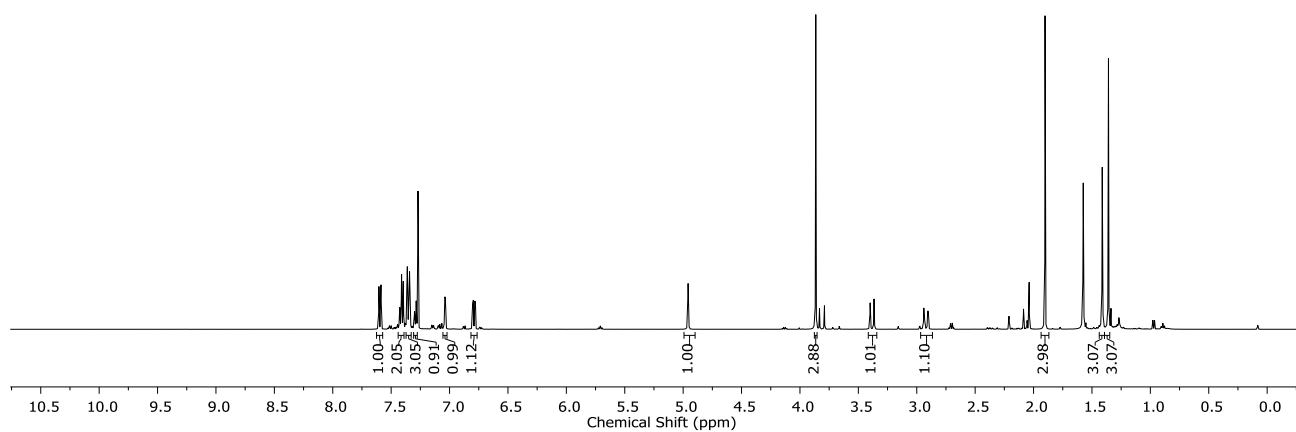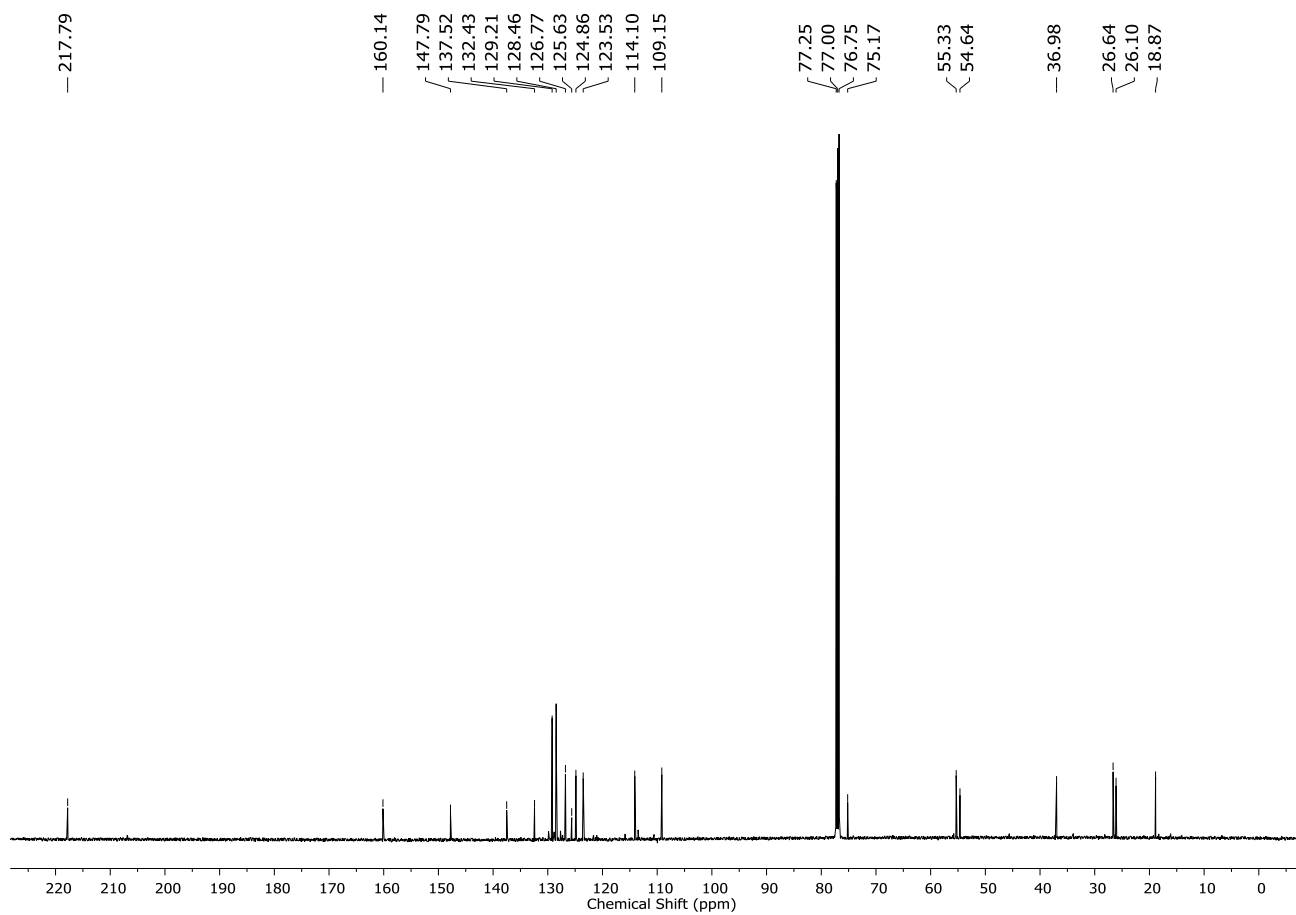

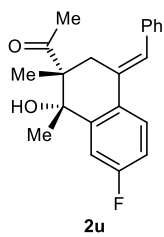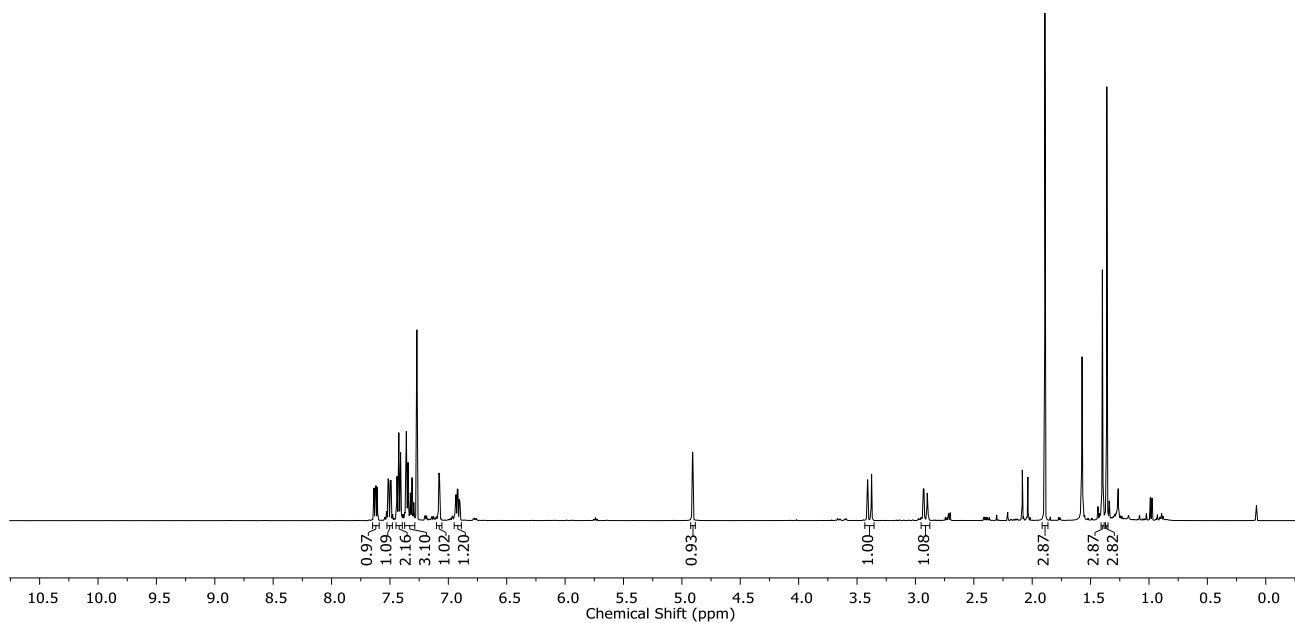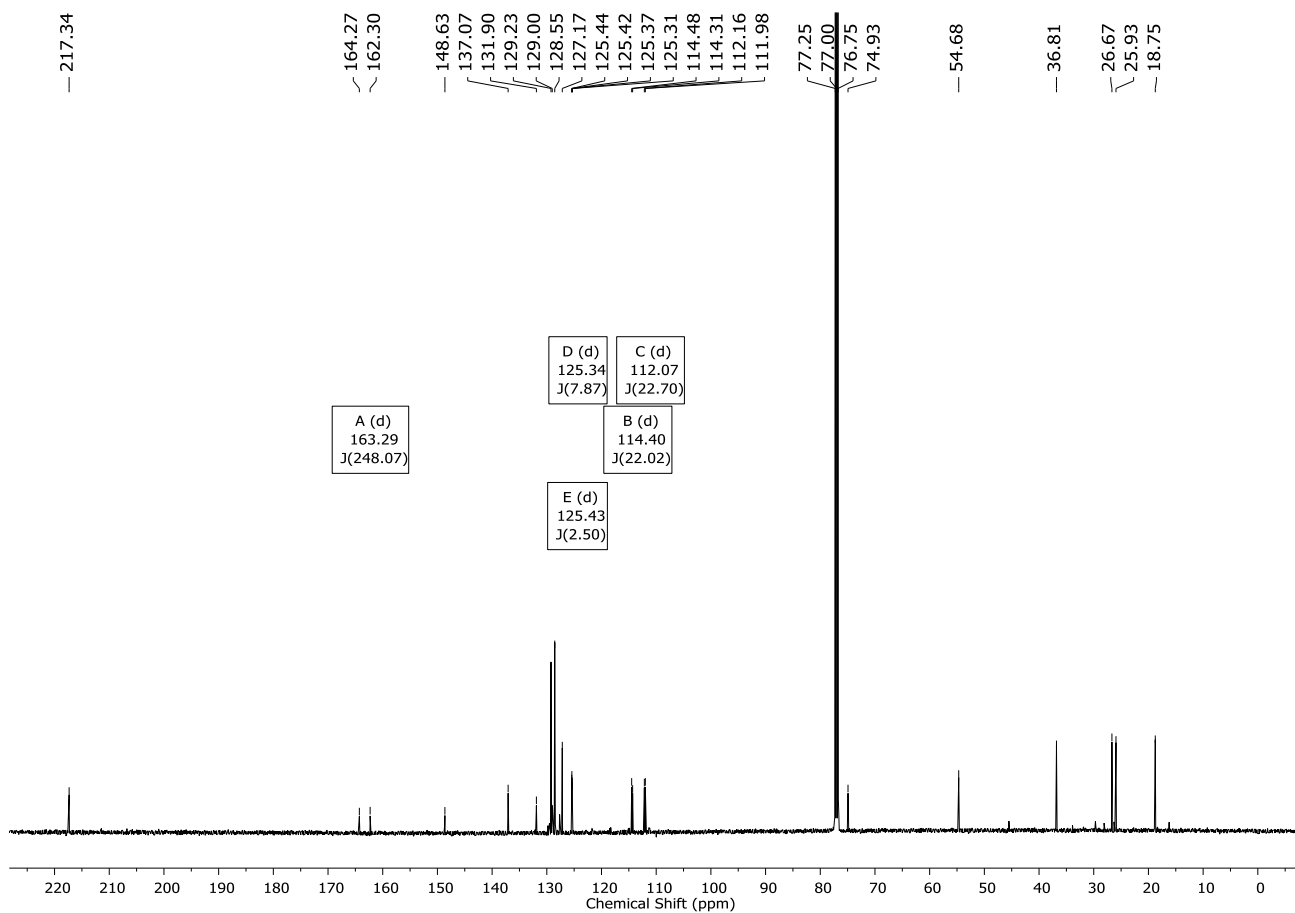

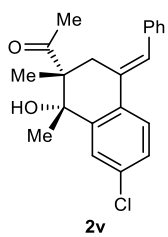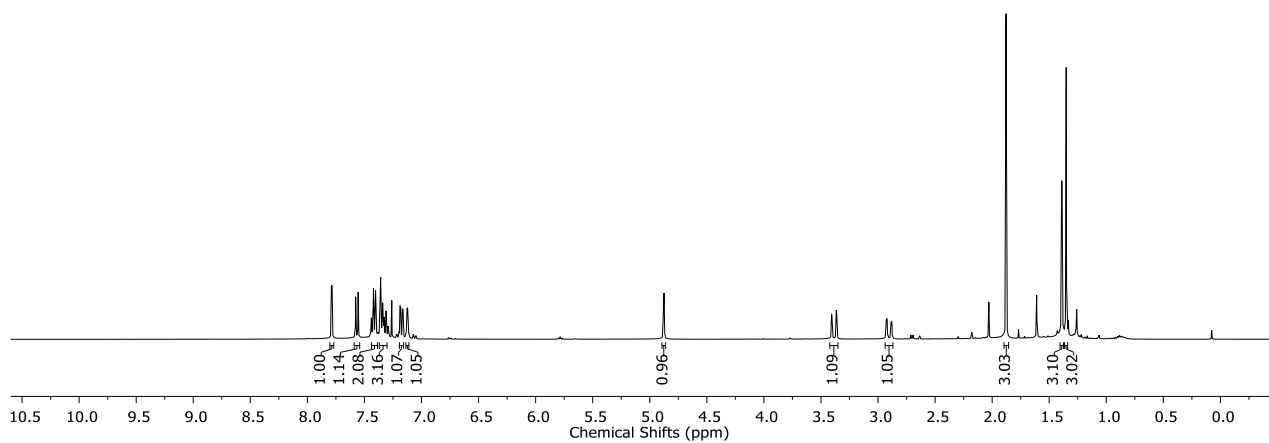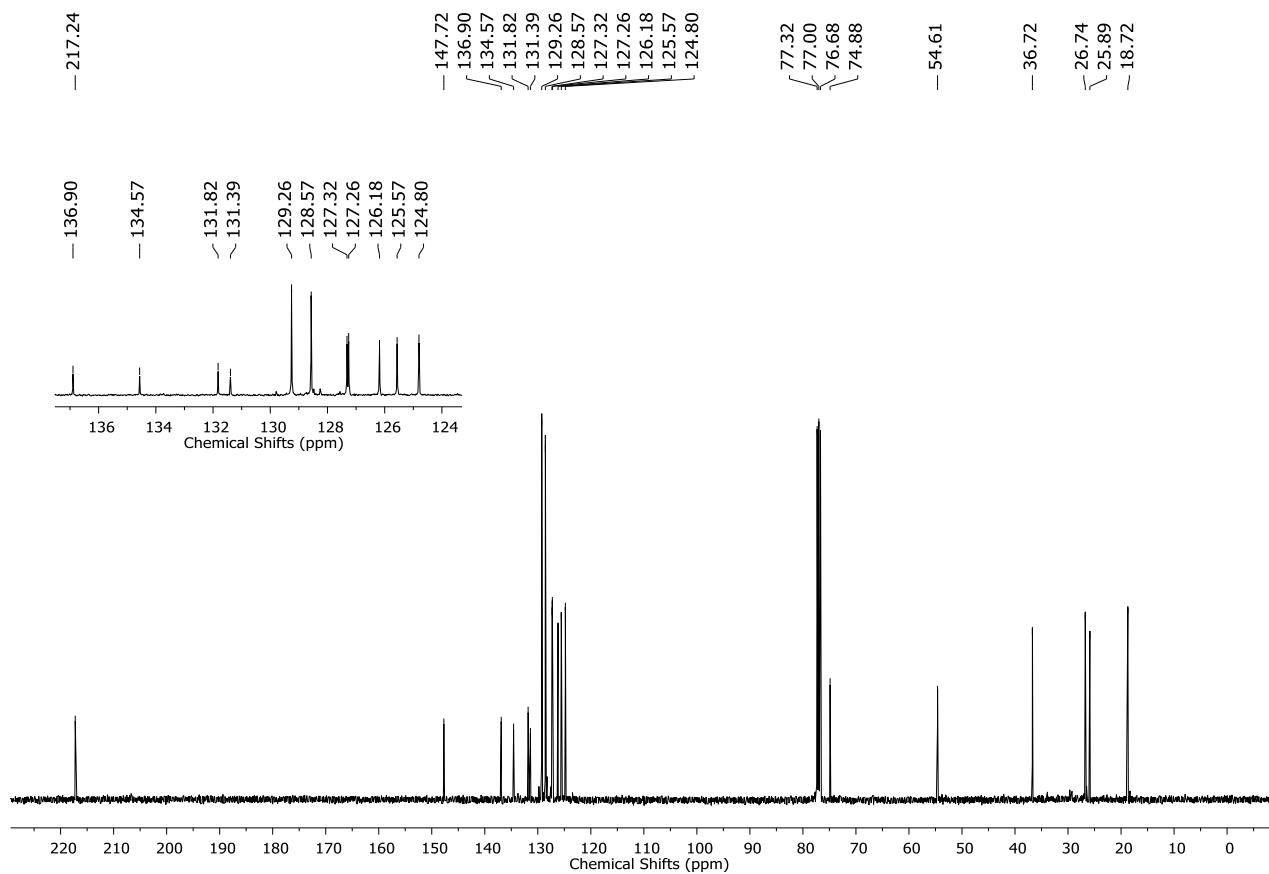

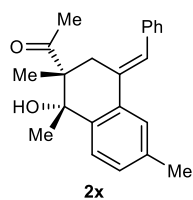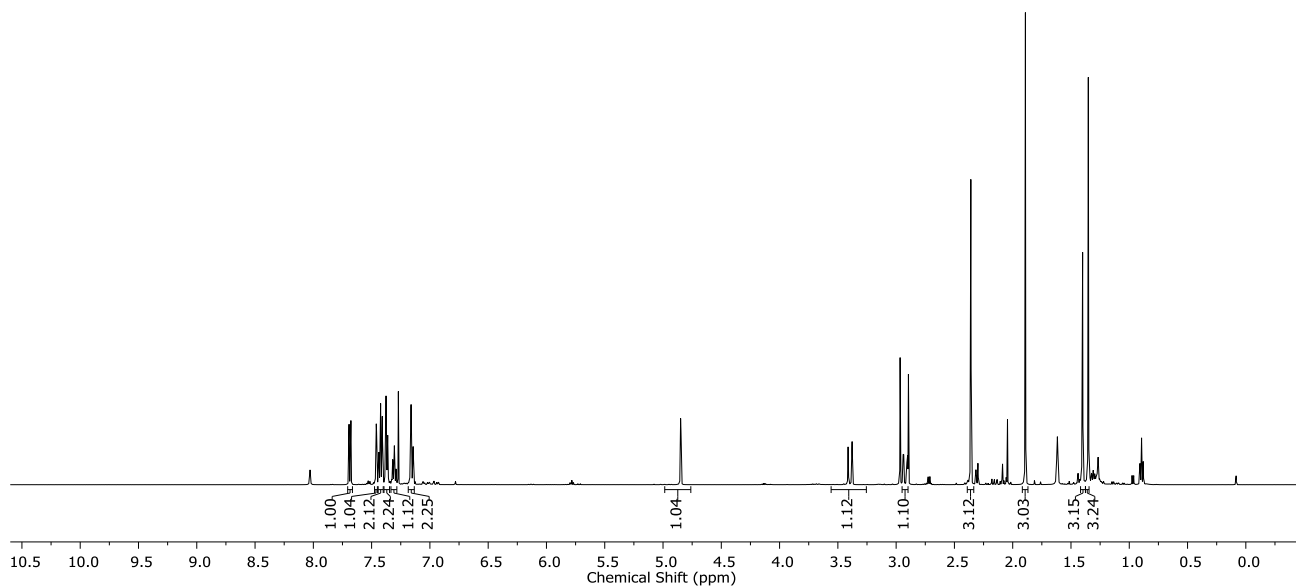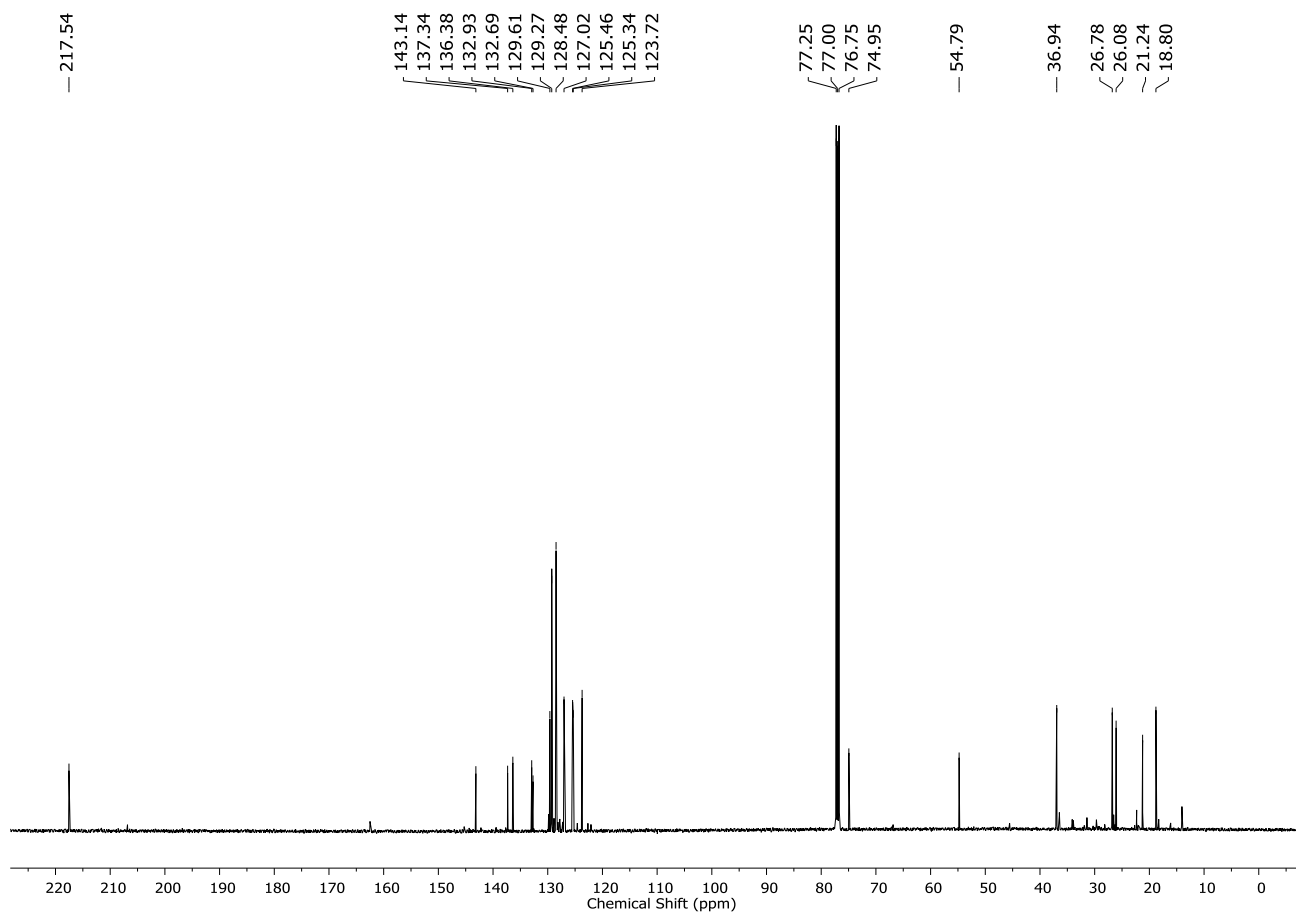



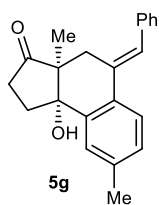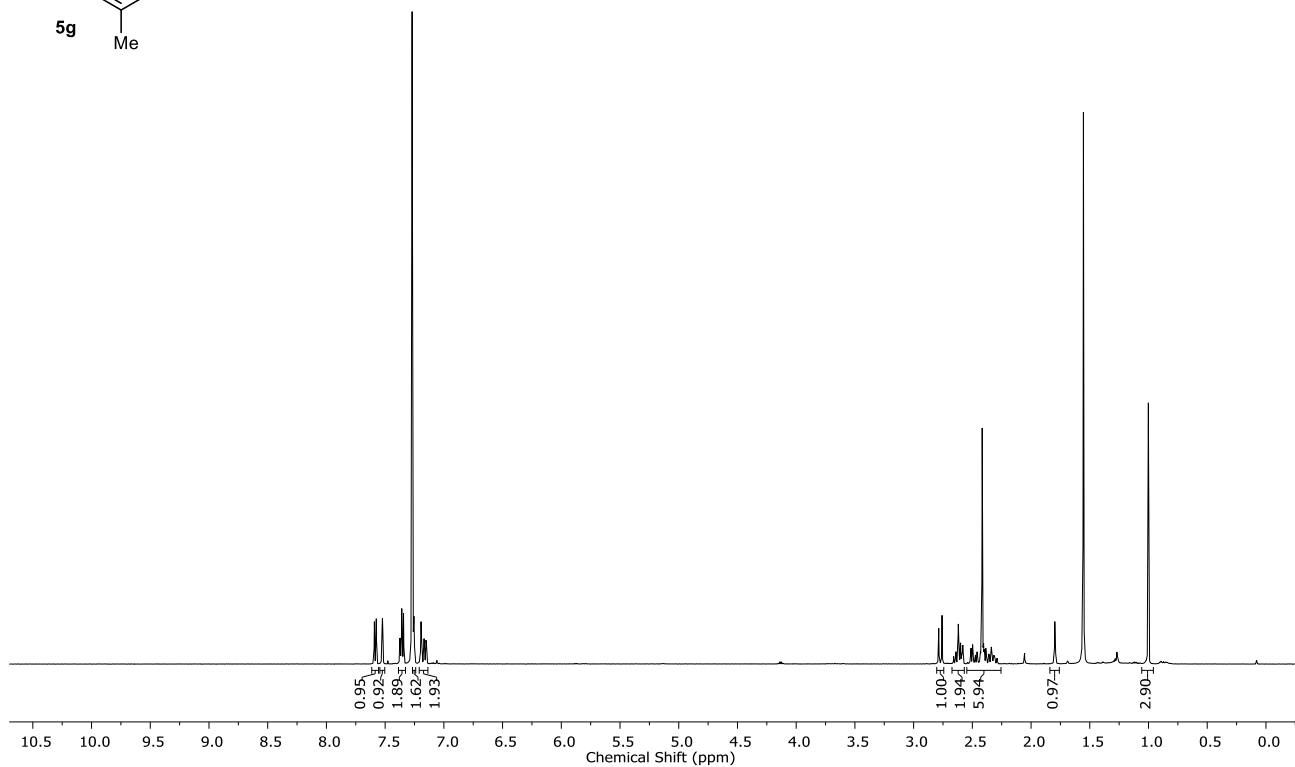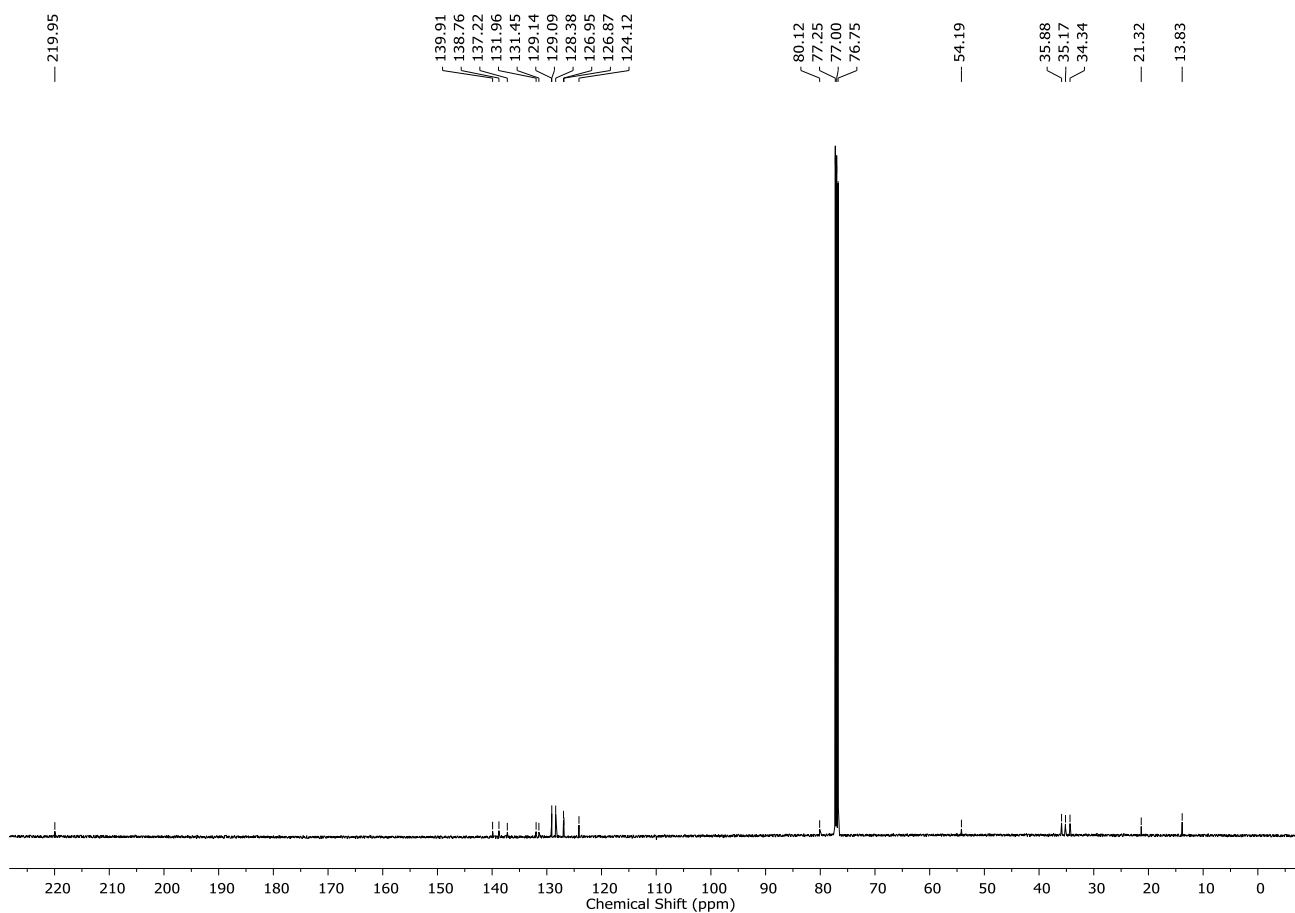

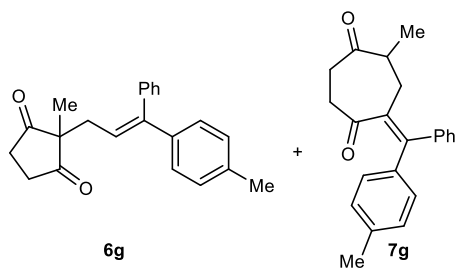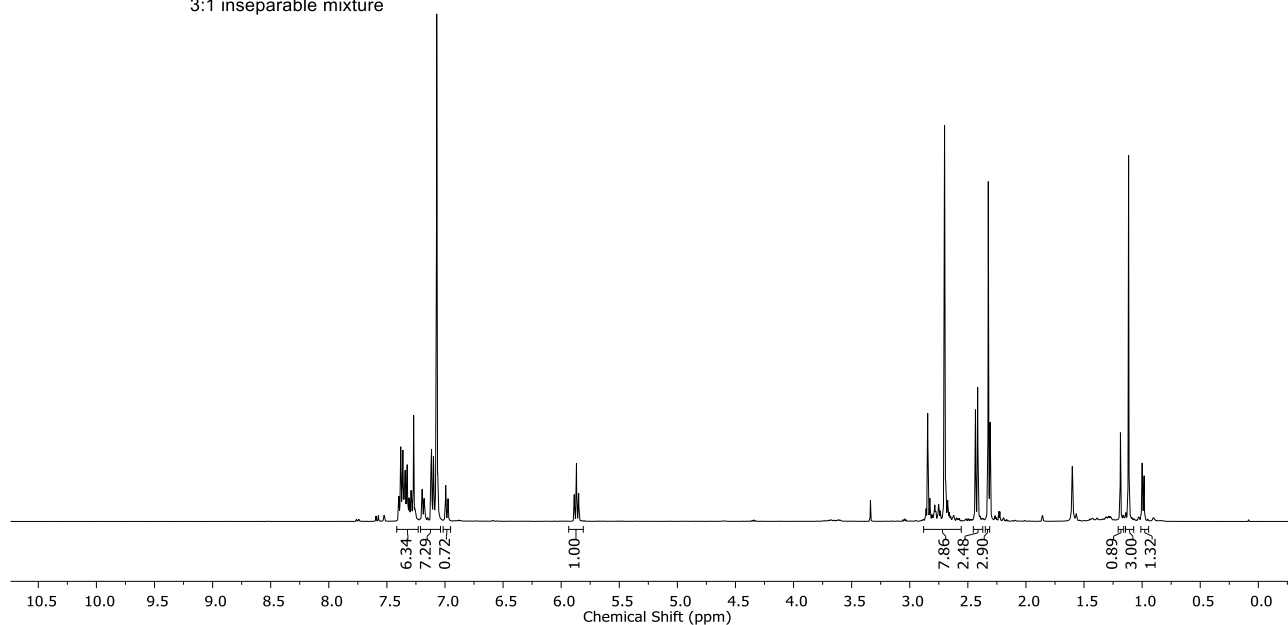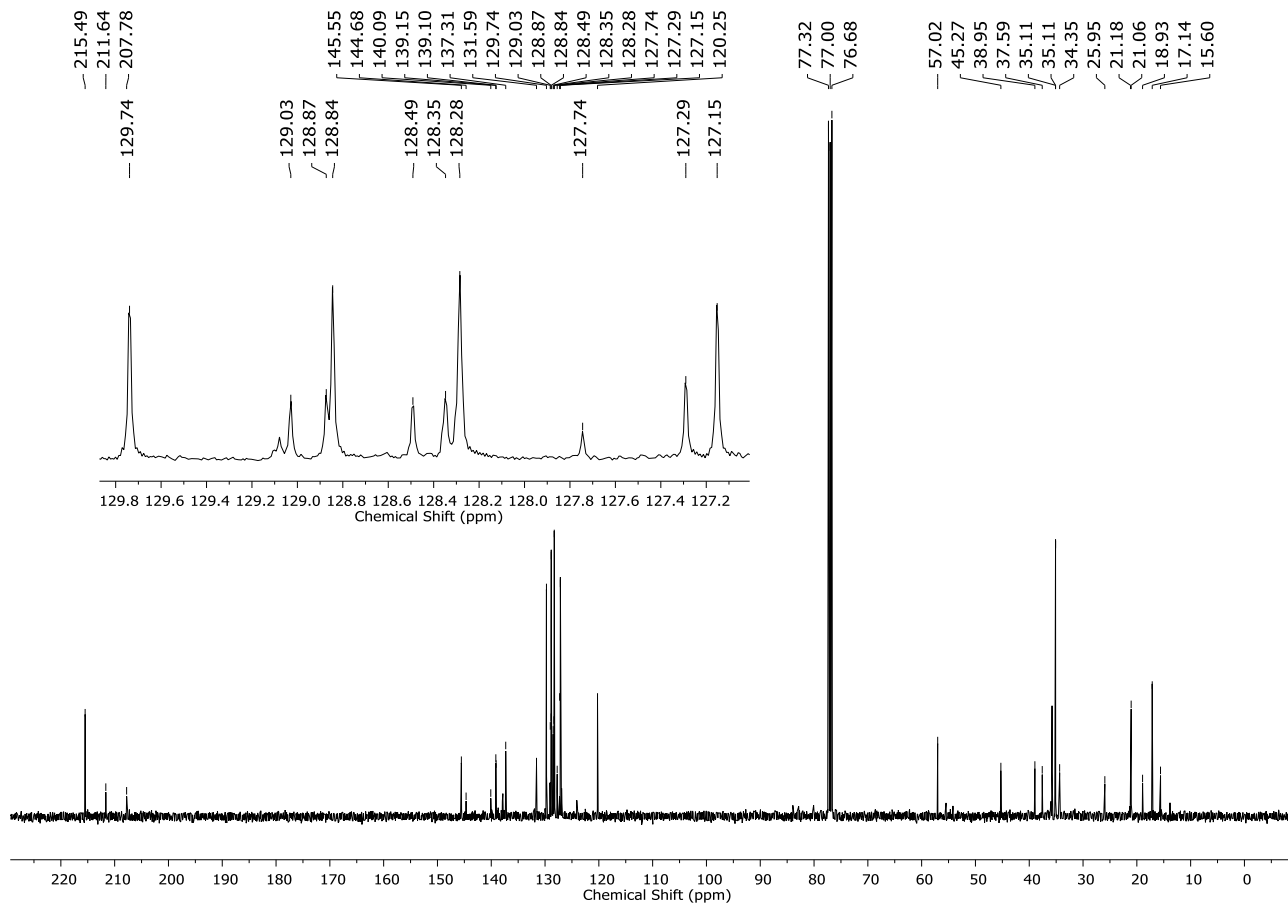

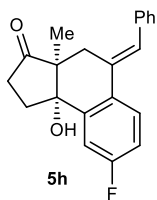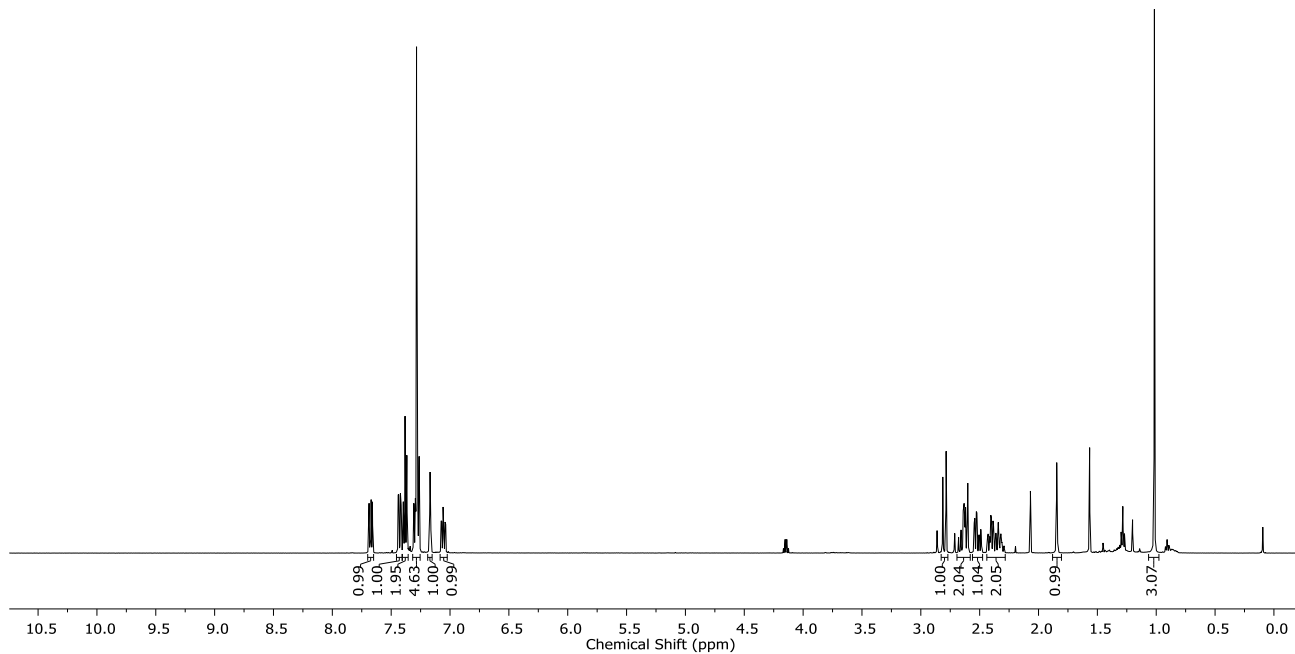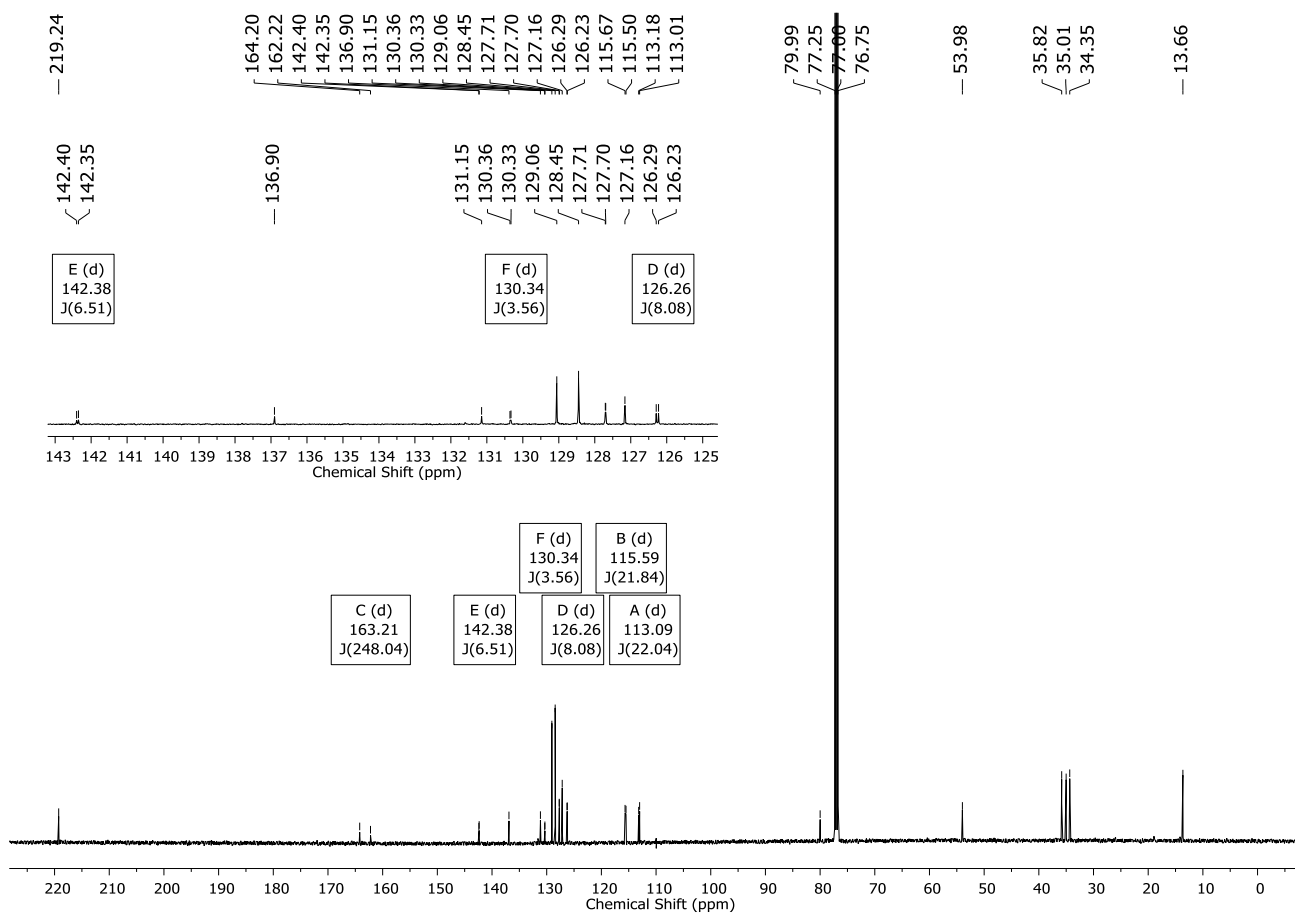

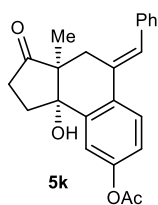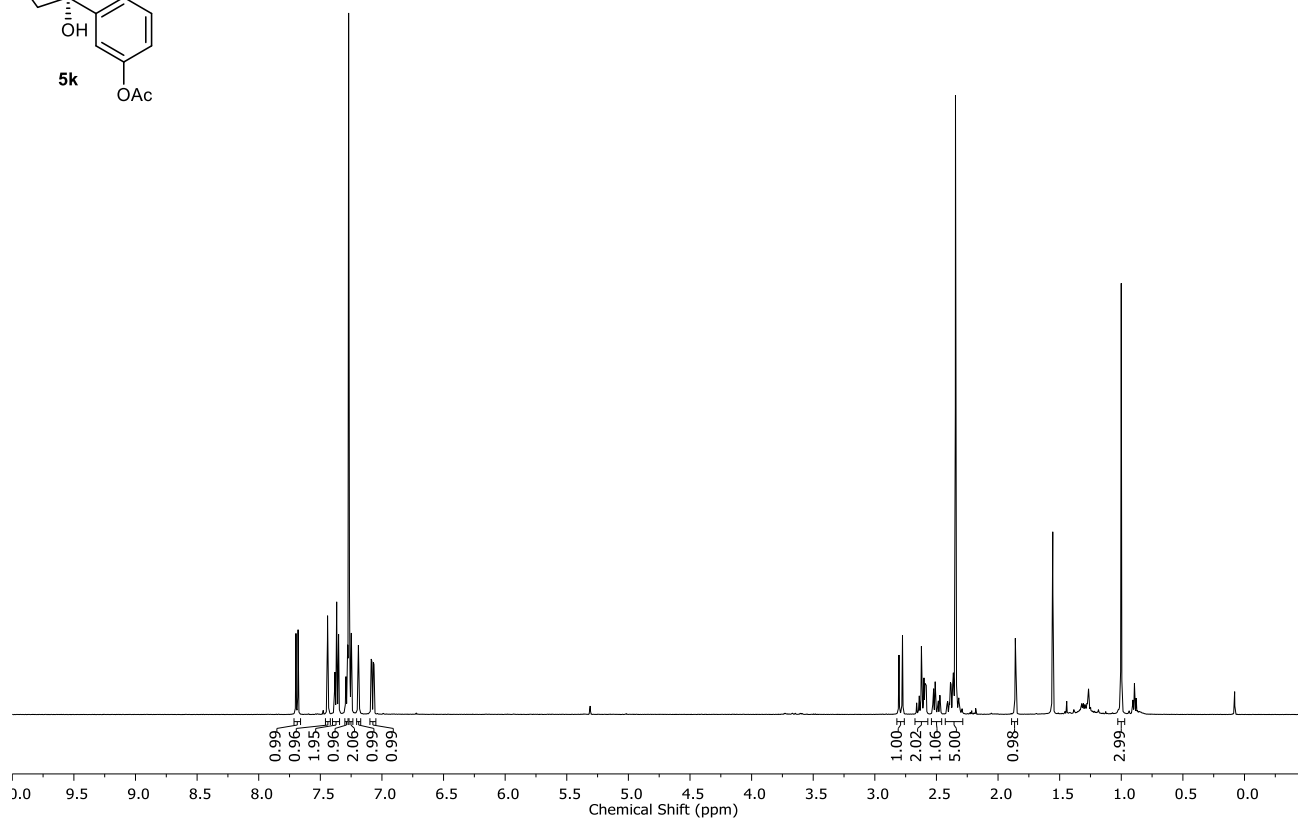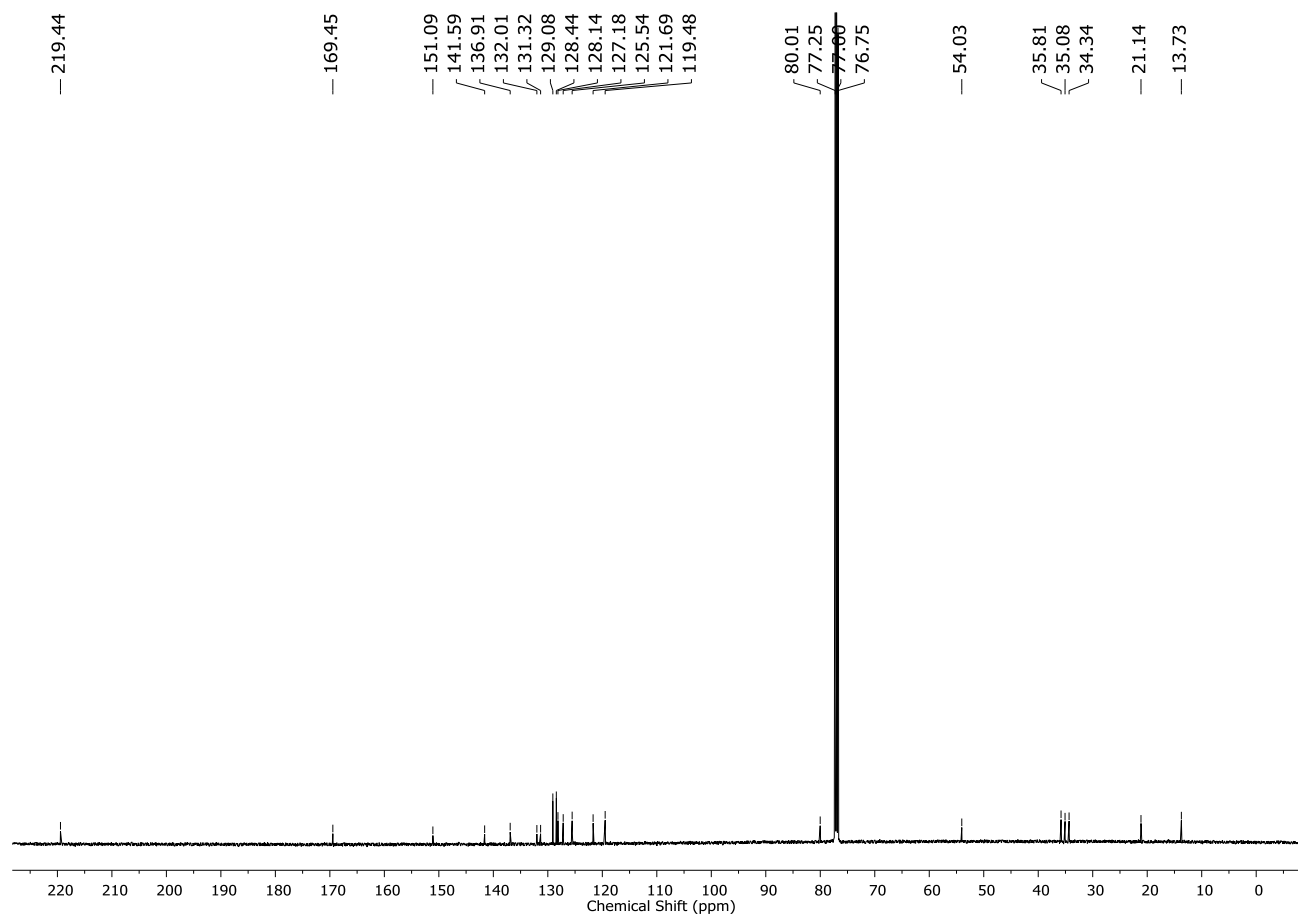

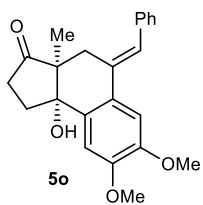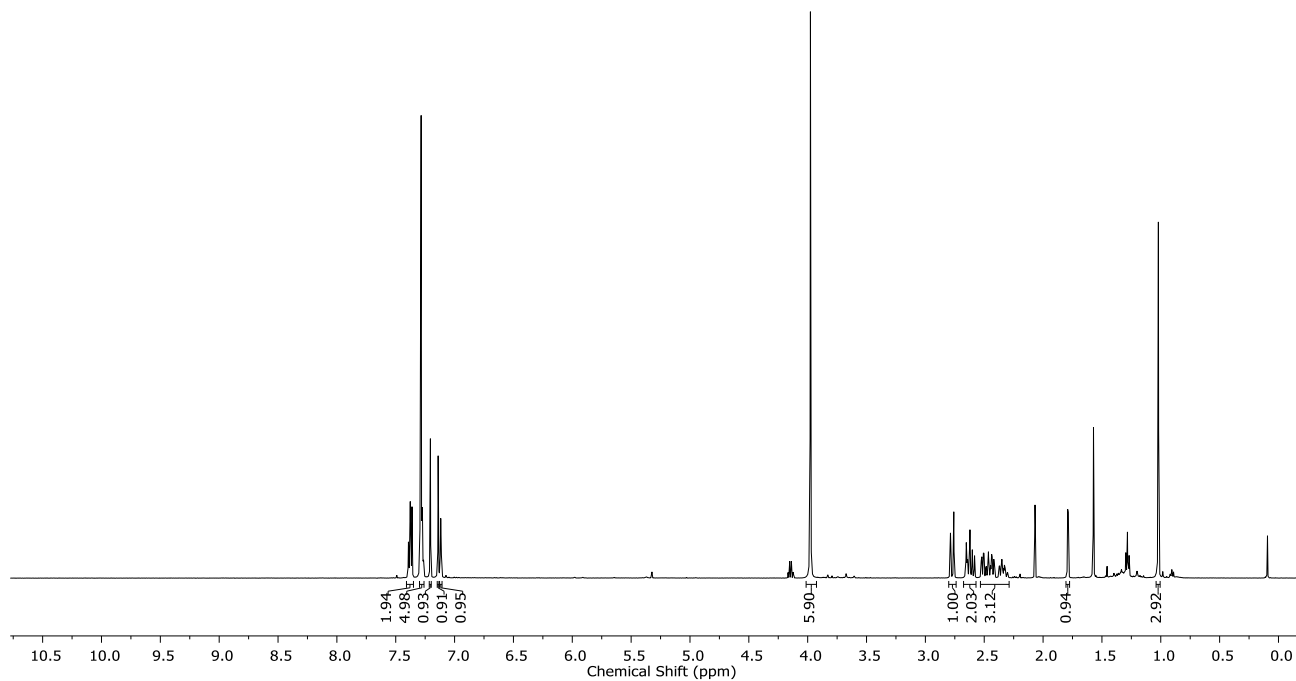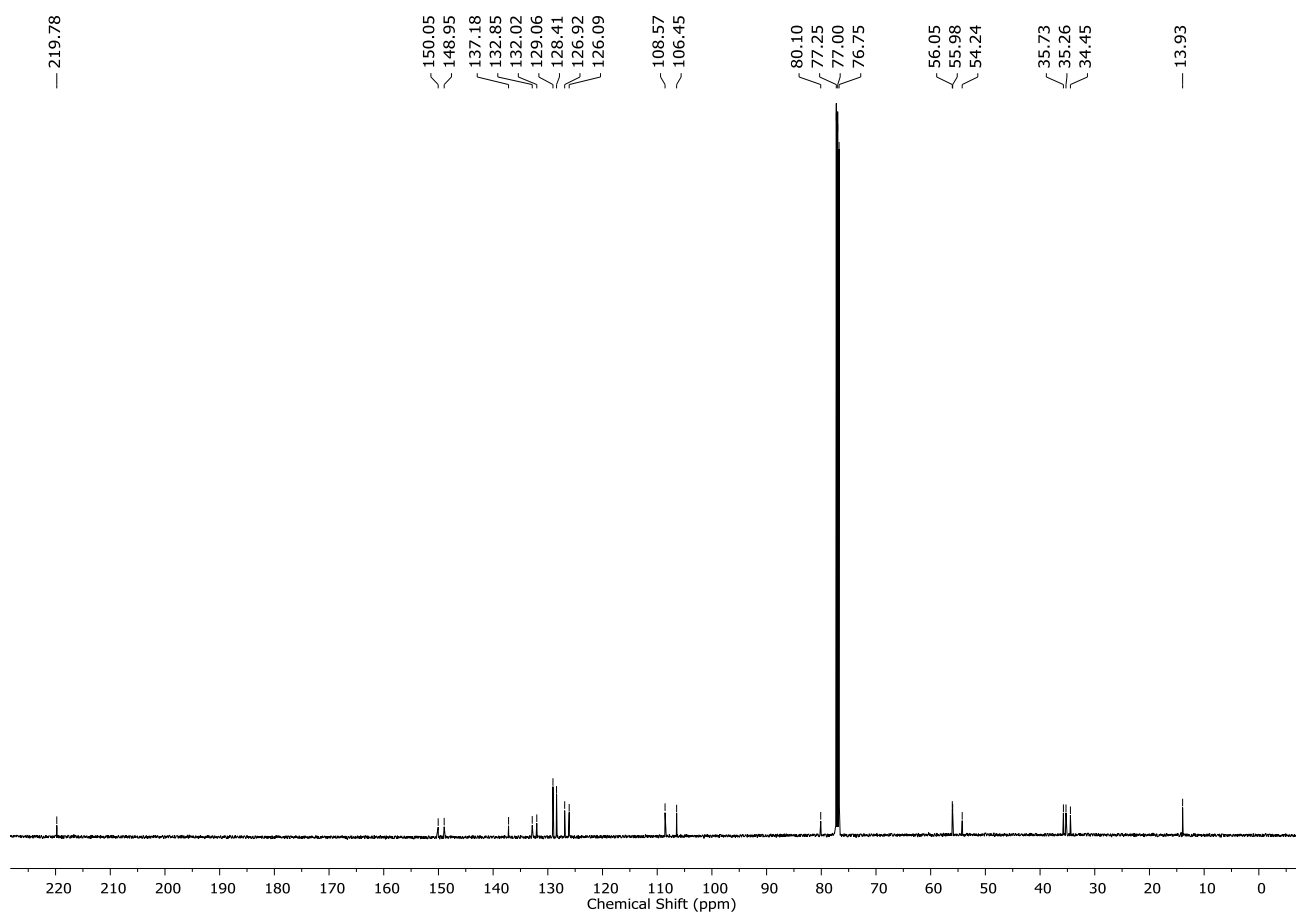

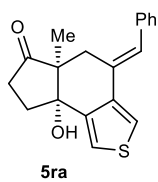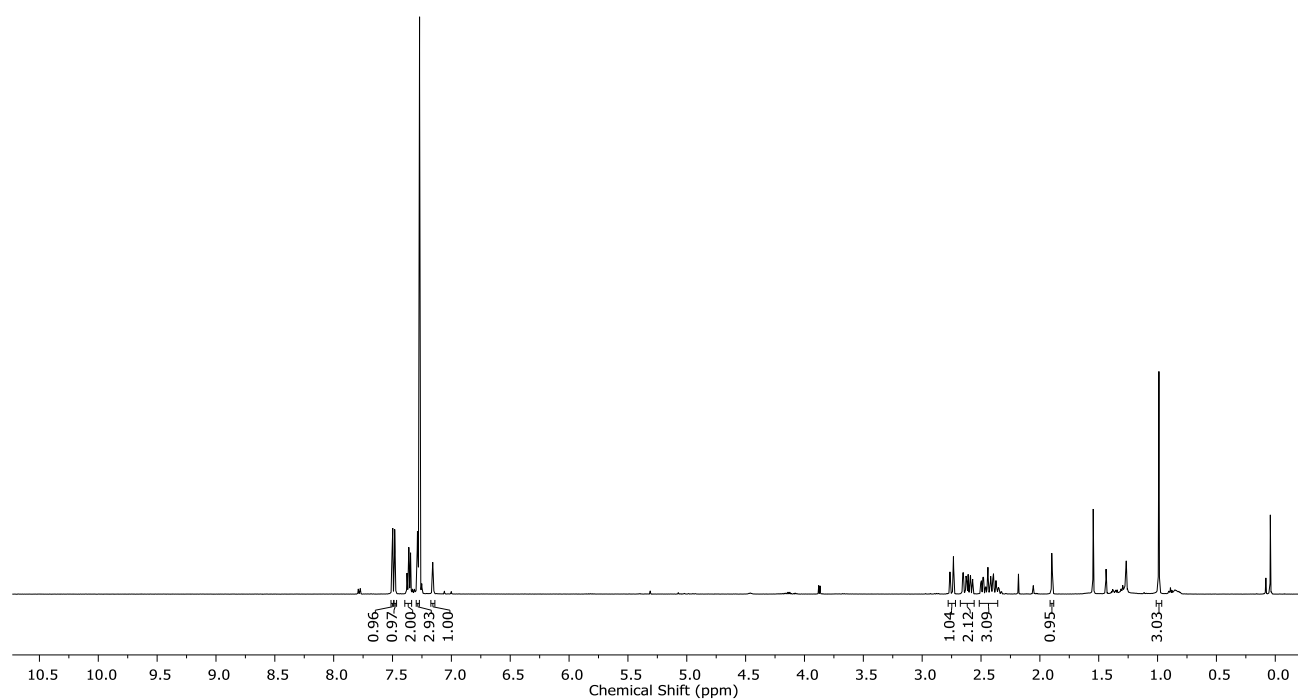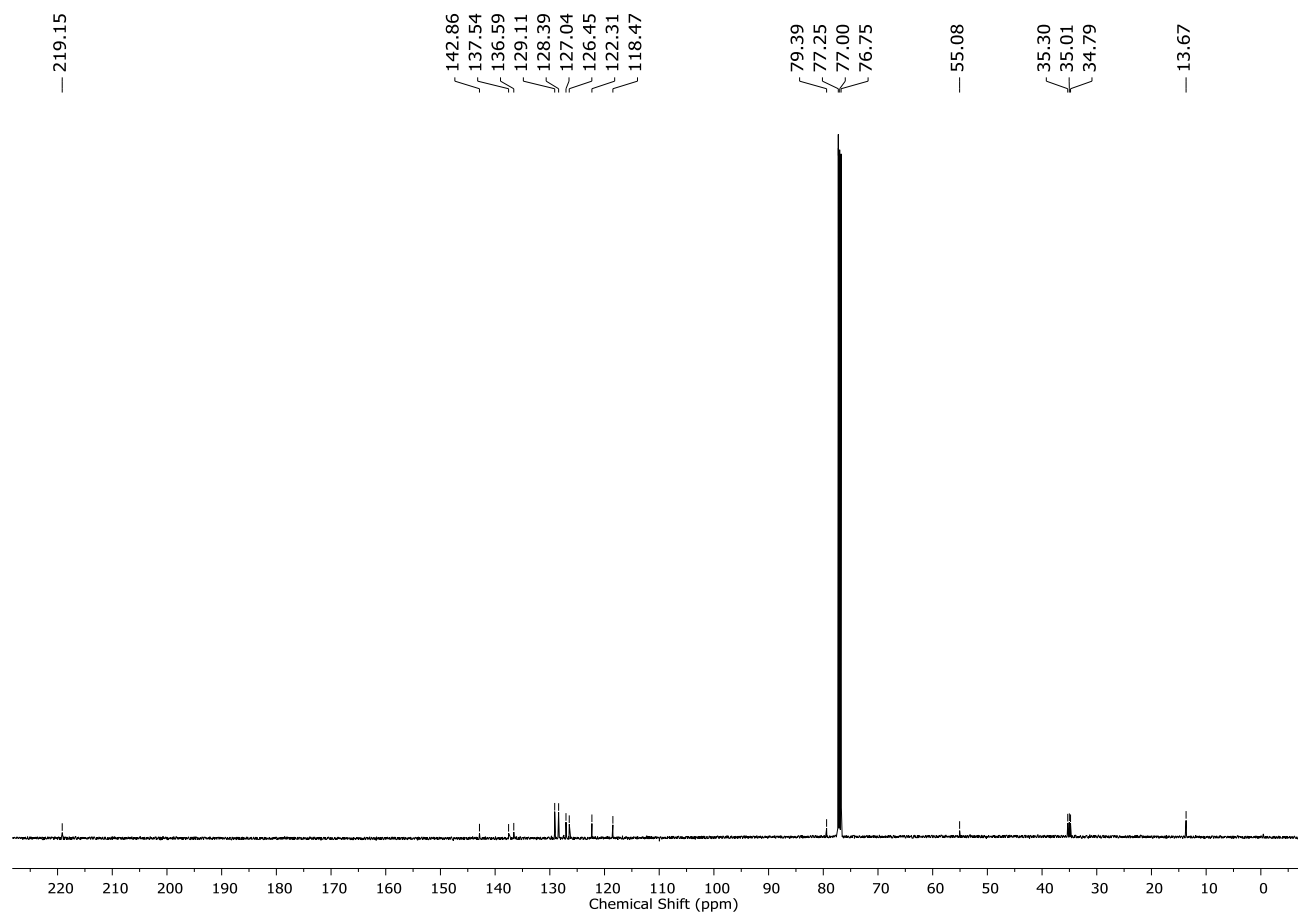

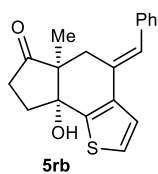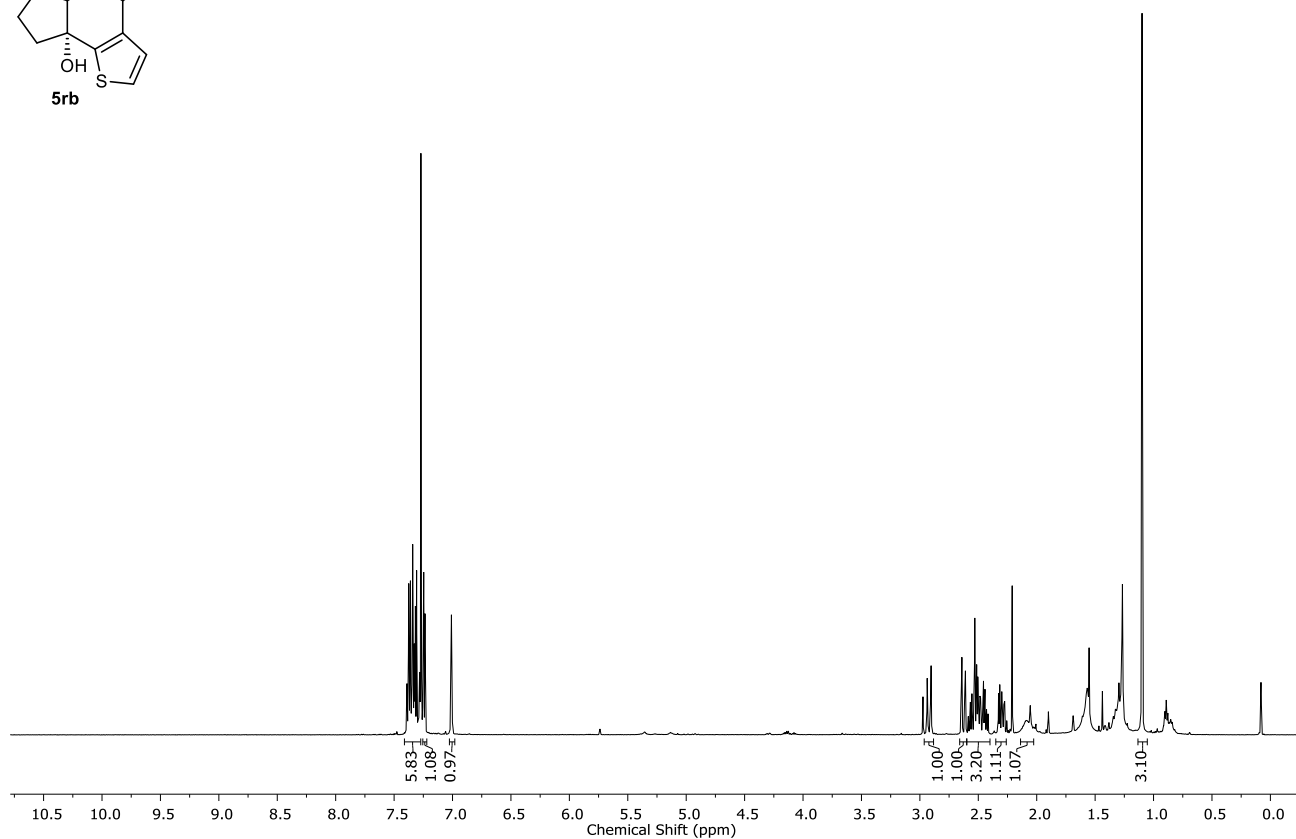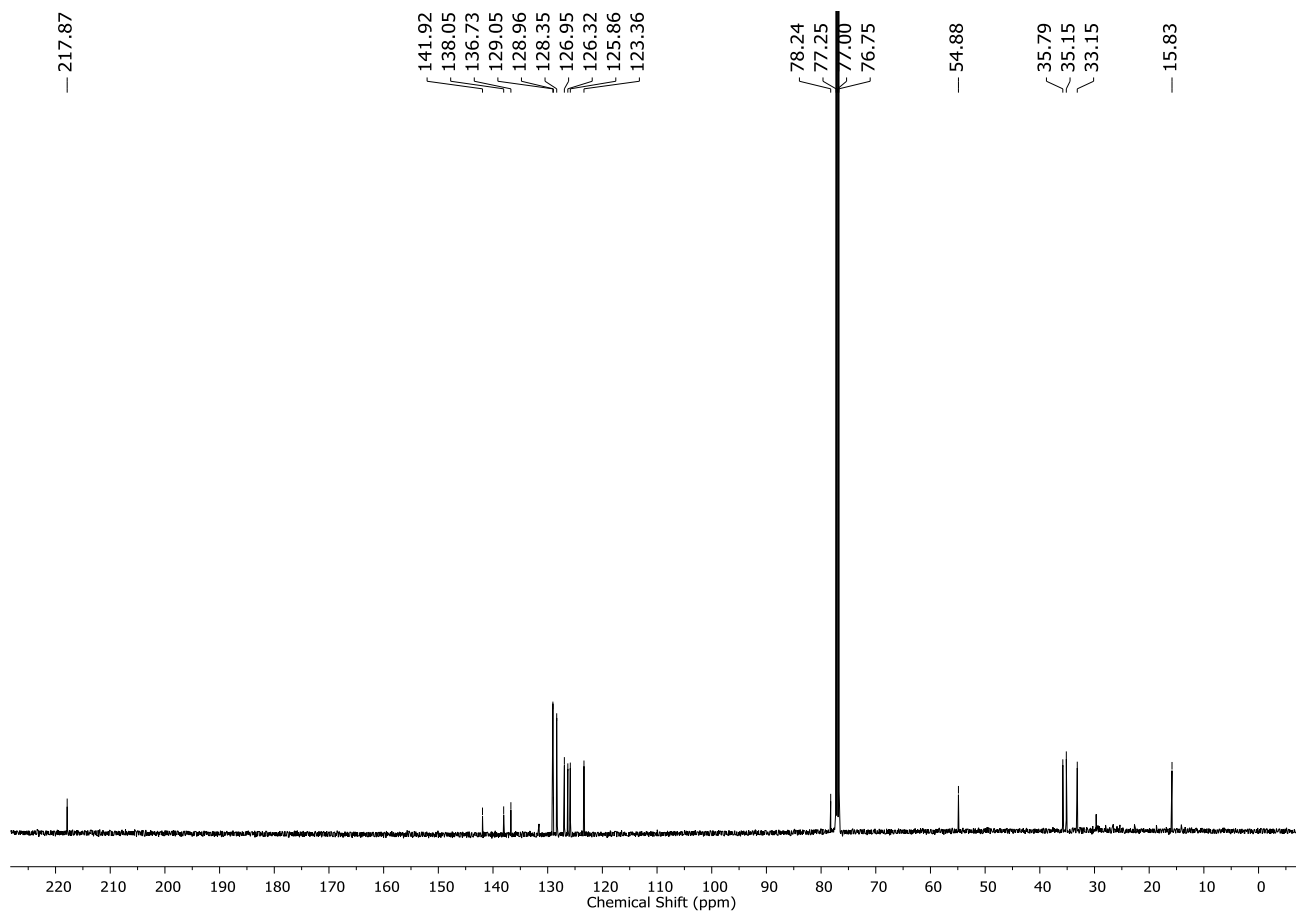

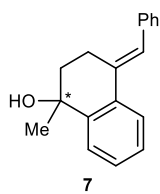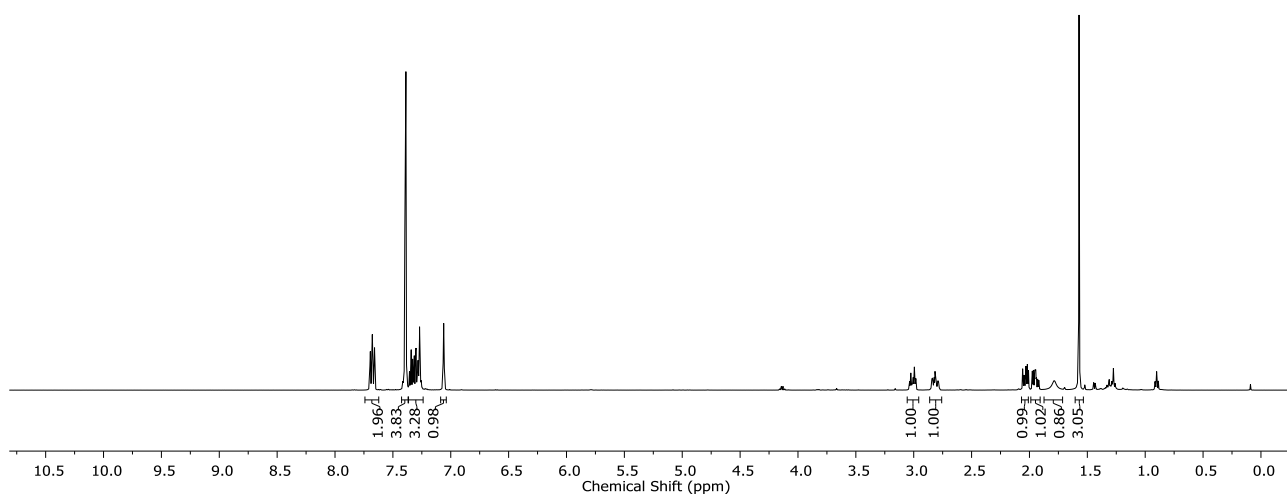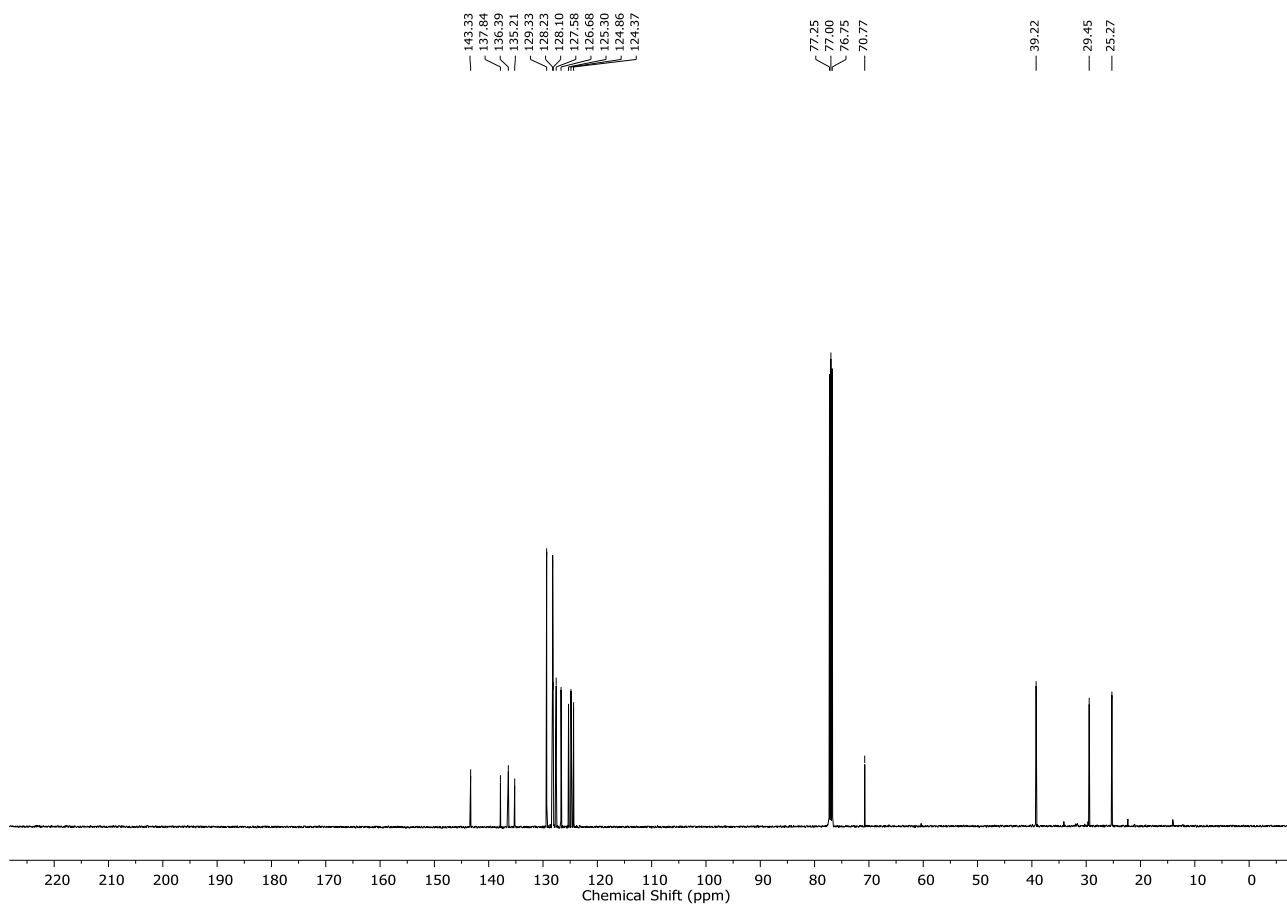



## HPLC Traces

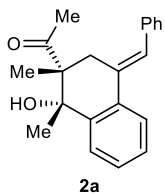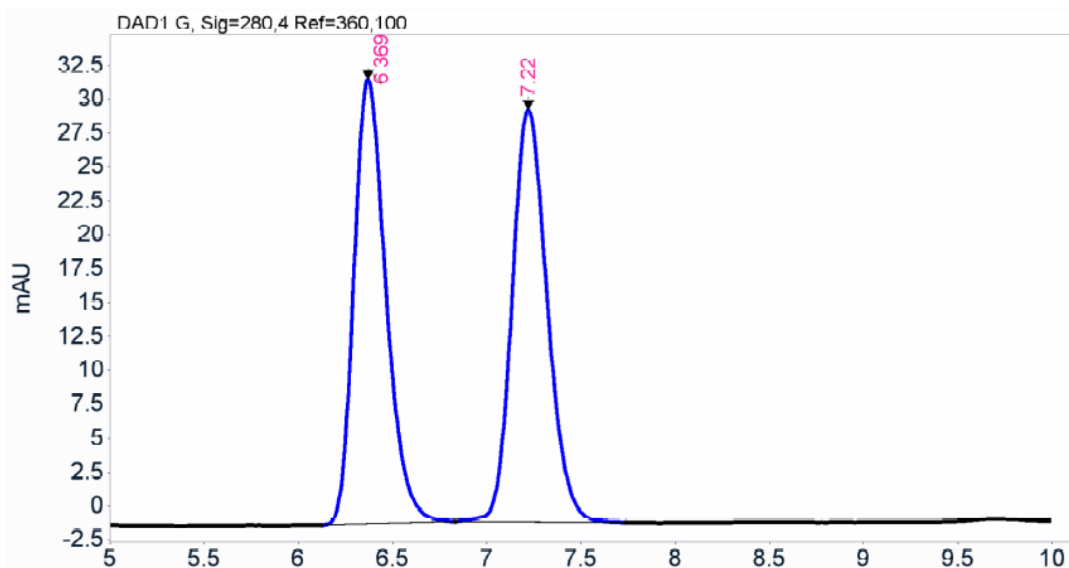

Signal: DAD1 G, Sig=280,4 Ref=360,100

| RT [min] | Type | Width [min] | Area    | Height  | Area% |
|----------|------|-------------|---------|---------|-------|
| 6.369    | BB   | 0.1813      | 385.180 | 32.7262 | 49.52 |
| 7.220    | BB   | 0.1987      | 392.669 | 30.3892 | 50.48 |

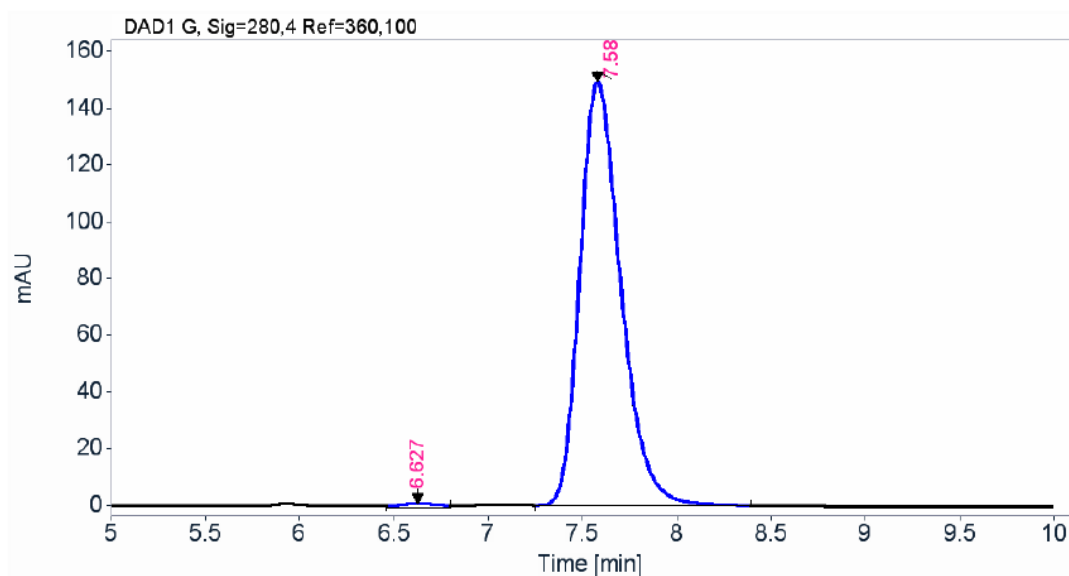

Signal: DAD1 G, Sig=280,4 Ref=360,100

| RT [min] | Type | Width [min] | Area     | Height   | Area% |
|----------|------|-------------|----------|----------|-------|
| 6.627    | MM   | 0.2520      | 20.633   | 1.3645   | 0.91  |
| 7.580    | BB   | 0.2317      | 2248.980 | 149.3599 | 99.09 |

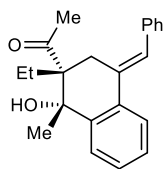

2b

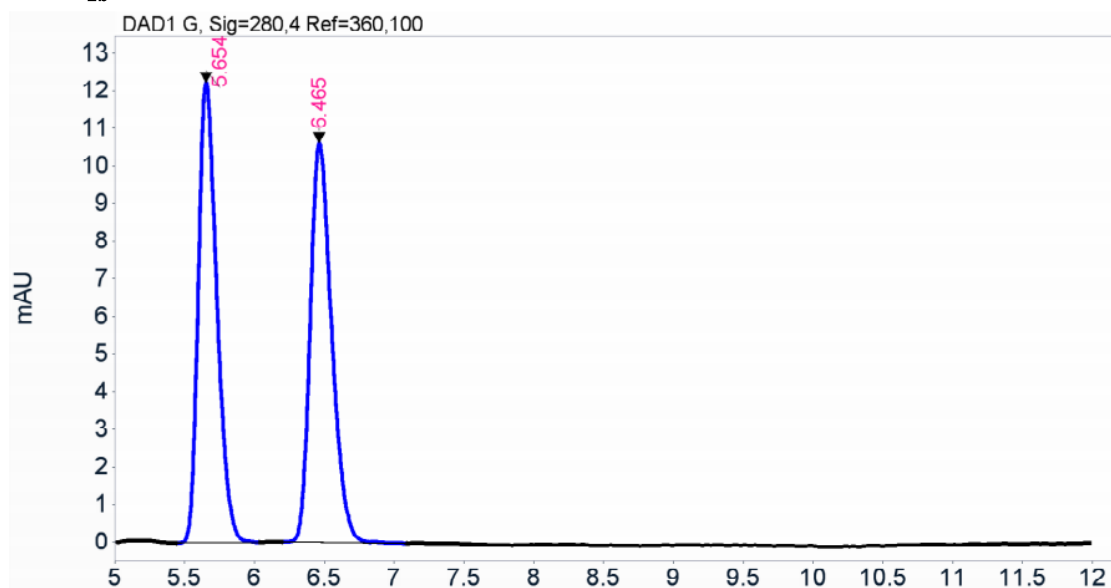

Signal: DAD1 G, Sig=280,4 Ref=360,100

| RT [min] | Type | Width [min] | Area    | Height  | Area% |
|----------|------|-------------|---------|---------|-------|
| 5.654    | BB   | 0.1395      | 112.808 | 12.2448 | 49.98 |
| 6.465    | BB   | 0.1620      | 112.883 | 10.6227 | 50.02 |

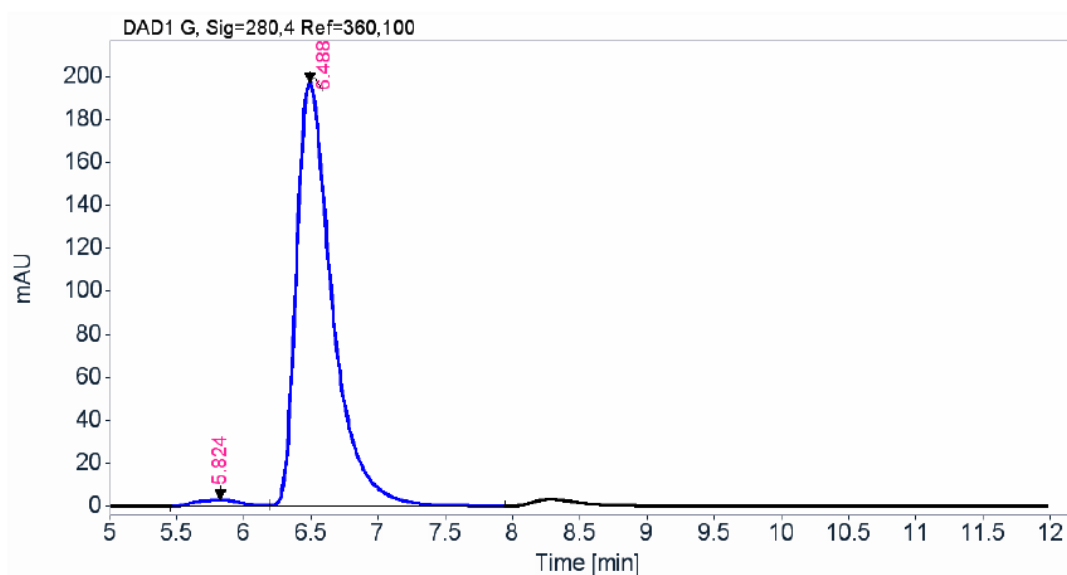

Signal: DAD1 G, Sig=280,4 Ref=360,100

| RT [min] | Type | Width [min] | Area     | Height   | Area% |
|----------|------|-------------|----------|----------|-------|
| 5.824    | BV   | 0.3101      | 62.928   | 2.9120   | 1.70  |
| 6.488    | VB   | 0.2772      | 3643.215 | 197.4686 | 98.30 |

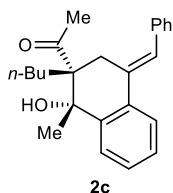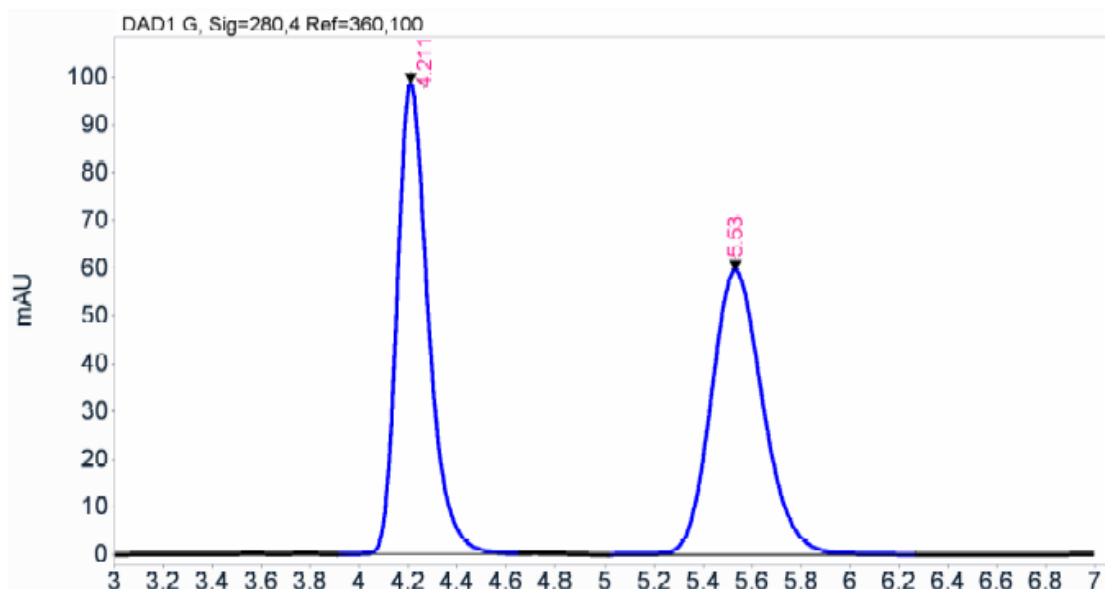

Signal: DAD1 G, Sig=280,4 Ref=360,100

| RT [min] | Type | Width [min] | Area    | Height  | Area% |
|----------|------|-------------|---------|---------|-------|
| 4.211    | BB   | 0.1346      | 866.564 | 98.5235 | 49.89 |
| 5.530    | BB   | 0.2268      | 870.260 | 59.4397 | 50.11 |

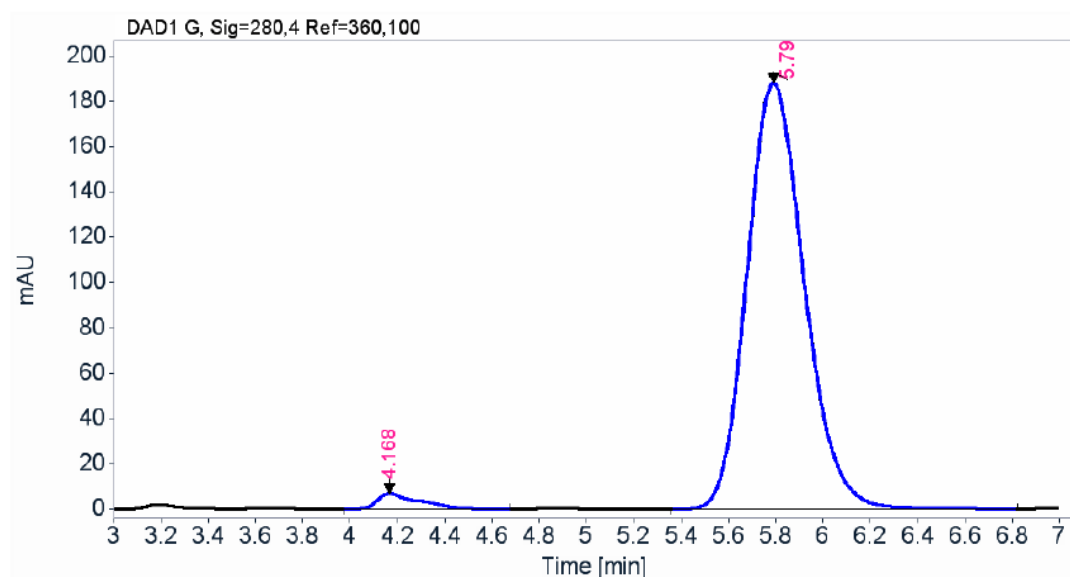

Signal: DAD1 G, Sig=280,4 Ref=360,100

| RT [min] | Type | Width [min] | Area     | Height   | Area% |
|----------|------|-------------|----------|----------|-------|
| 4.168    | BB   | 0.1702      | 82.161   | 6.7397   | 2.54  |
| 5.790    | BB   | 0.2599      | 3158.171 | 188.1224 | 97.46 |

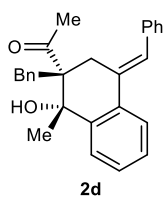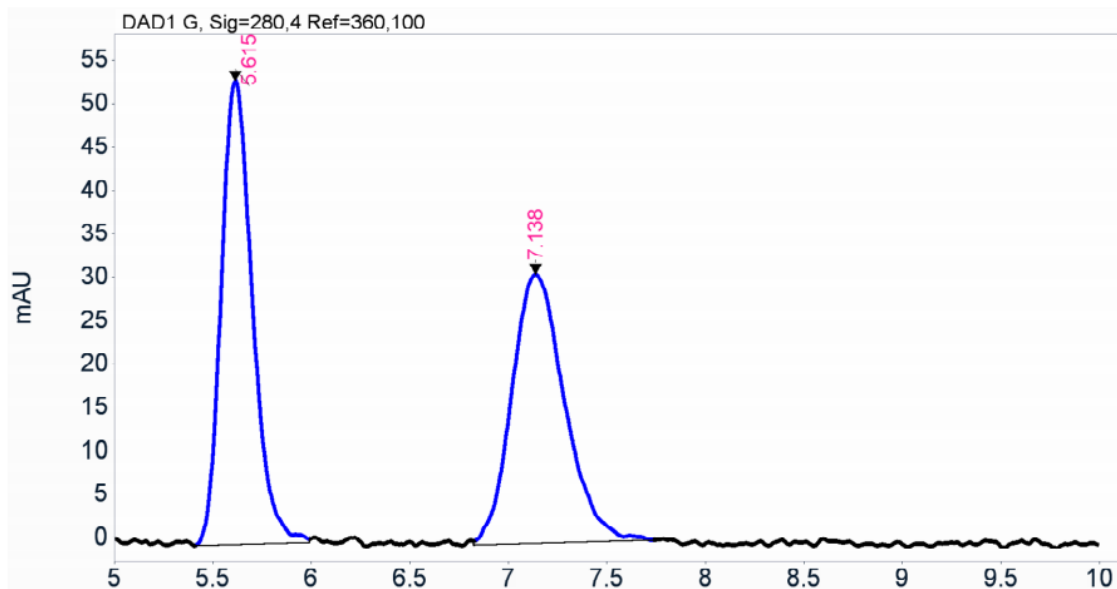

Signal: DAD1 G, Sig=280,4 Ref=360,100

| RT [min] | Type | Width [min] | Area    | Height  | Area% |
|----------|------|-------------|---------|---------|-------|
| 5.615    | BV   | 0.1679      | 584.283 | 53.2843 | 50.33 |
| 7.138    | VB   | 0.2893      | 576.689 | 30.9583 | 49.67 |

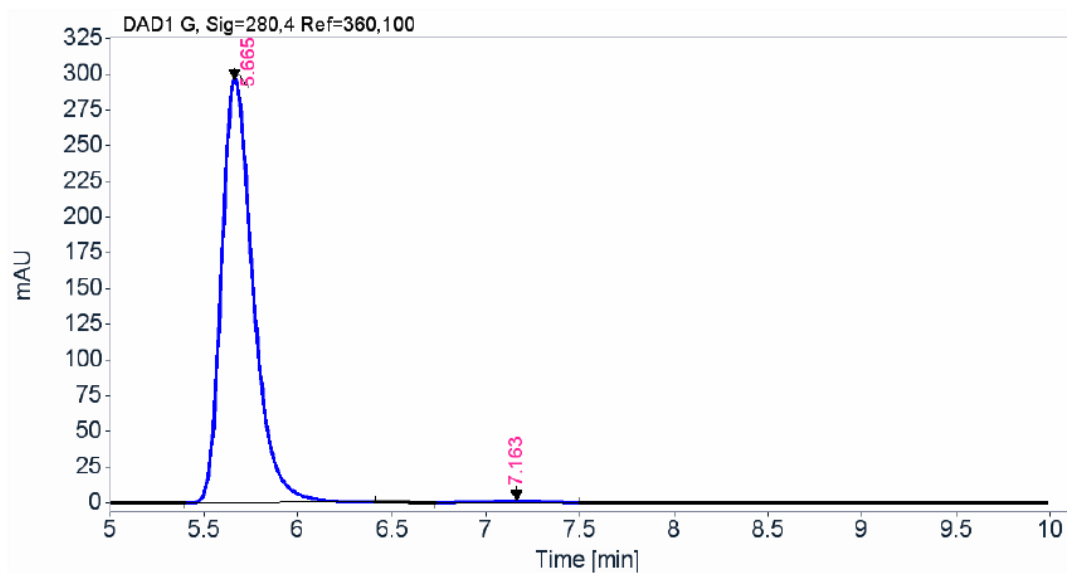

Signal: DAD1 G, Sig=280,4 Ref=360,100

| RT [min] | Type | Width [min] | Area     | Height   | Area% |
|----------|------|-------------|----------|----------|-------|
| 5.665    | BB   | 0.1780      | 3460.021 | 296.8958 | 99.21 |
| 7.163    | BB   | 0.2614      | 27.504   | 1.4761   | 0.79  |

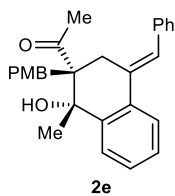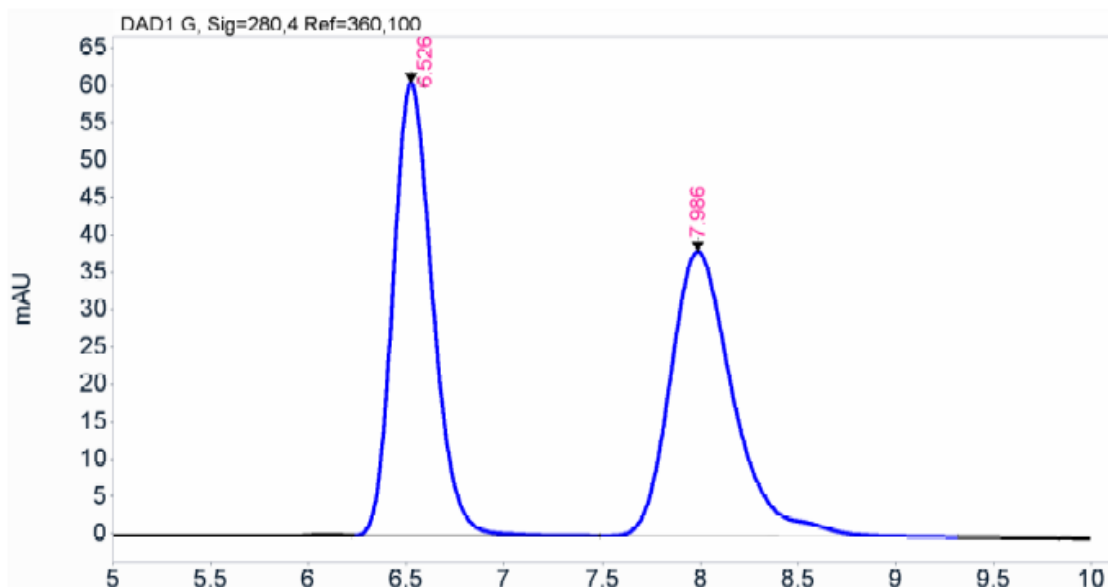

Signal: DAD1 G, Sig=280,4 Ref=360,100

| RT [min] | Type | Width [min] | Area    | Height  | Area% |
|----------|------|-------------|---------|---------|-------|
| 6.526    | BB   | 0.2176      | 849.526 | 60.5746 | 49.90 |
| 7.986    | BB   | 0.3413      | 853.081 | 38.0871 | 50.10 |

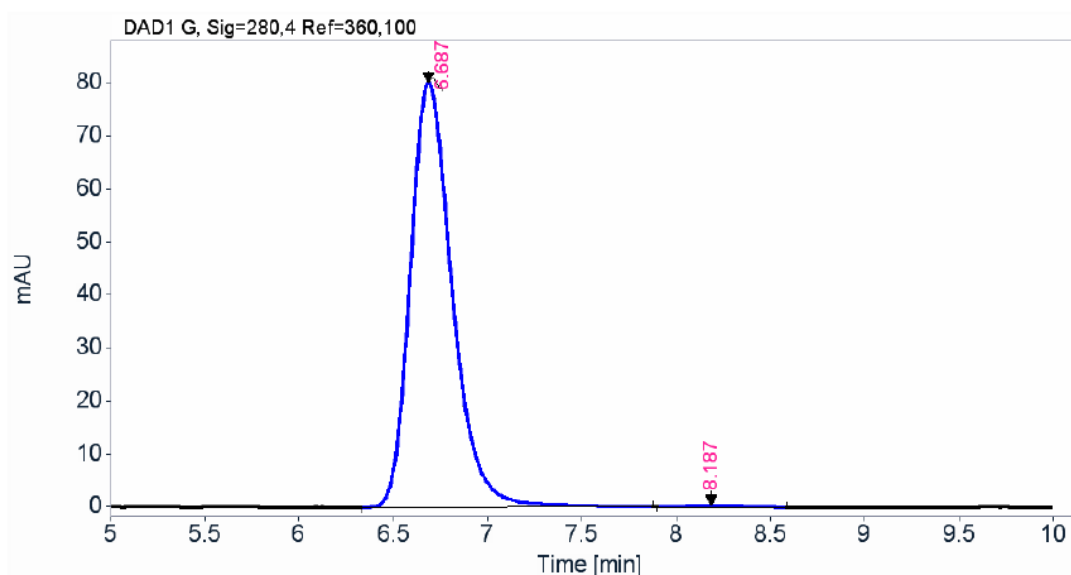

Signal: DAD1 G, Sig=280,4 Ref=360,100

| RT [min] | Type | Width [min] | Area     | Height  | Area% |
|----------|------|-------------|----------|---------|-------|
| 6.687    | BB   | 0.2360      | 1236.546 | 80.1485 | 99.03 |
| 8.187    | MM   | 0.4074      | 12.110   | 0.4955  | 0.97  |

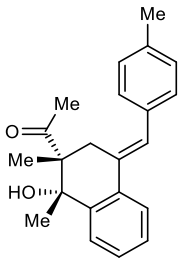

2f

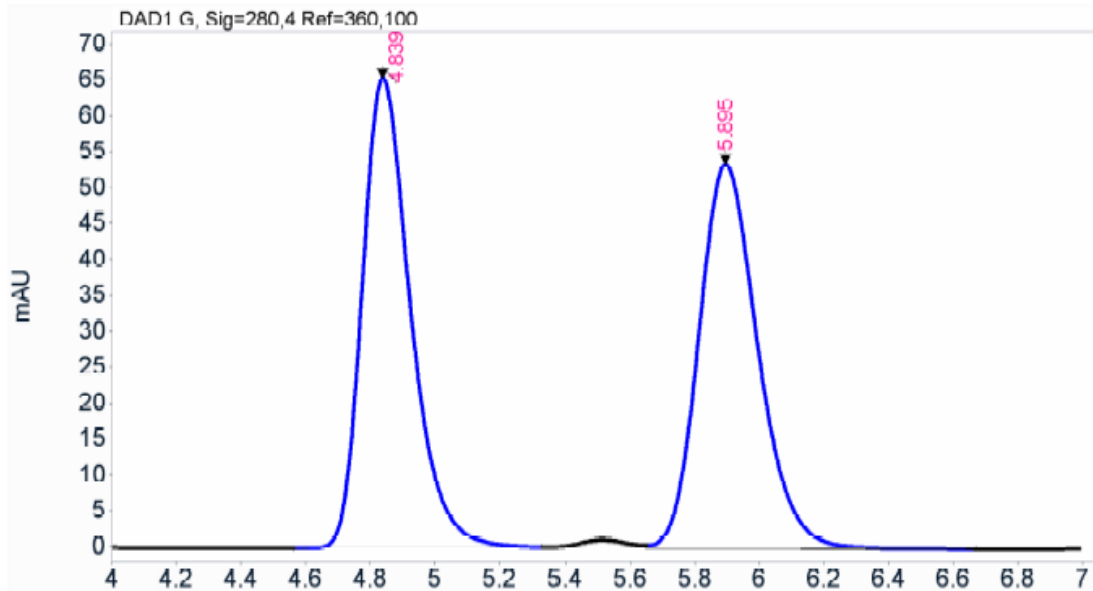

Signal: DAD1 G, Sig=280,4 Ref=360,100

| RT [min] | Type | Width [min] | Area    | Height  | Area% |
|----------|------|-------------|---------|---------|-------|
| 4.839    | BB   | 0.1567      | 677.047 | 65.4499 | 50.08 |
| 5.895    | VB   | 0.1953      | 674.862 | 53.4393 | 49.92 |

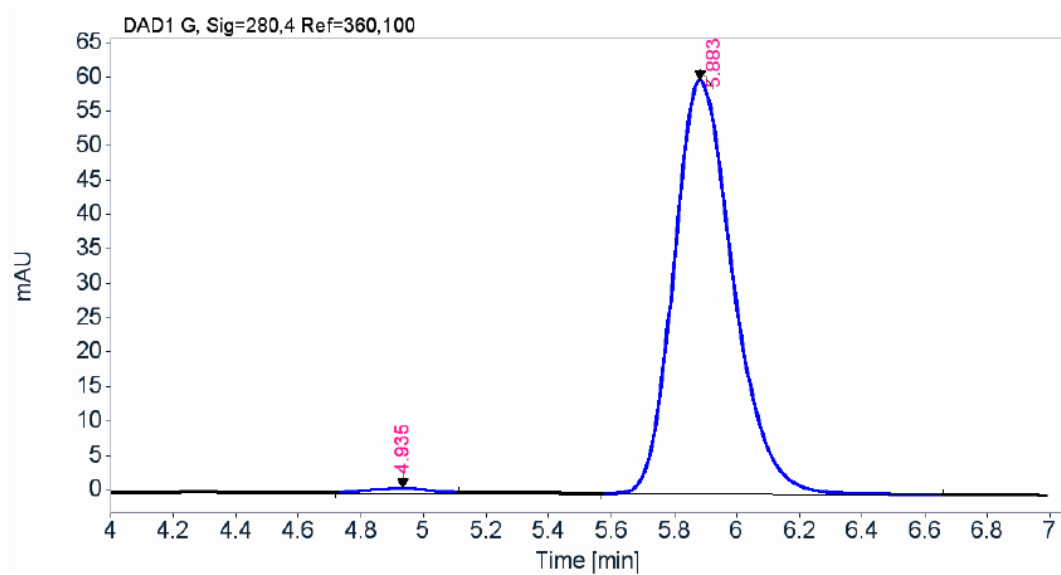

Signal: DAD1 G, Sig=280,4 Ref=360,100

| RT [min] | Type | Width [min] | Area    | Height  | Area% |
|----------|------|-------------|---------|---------|-------|
| 4.935    | MM   | 0.2378      | 11.071  | 0.7758  | 1.39  |
| 5.883    | BB   | 0.2008      | 786.953 | 60.0695 | 98.61 |

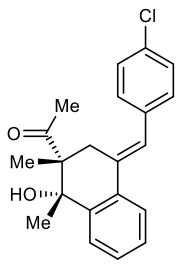

2g

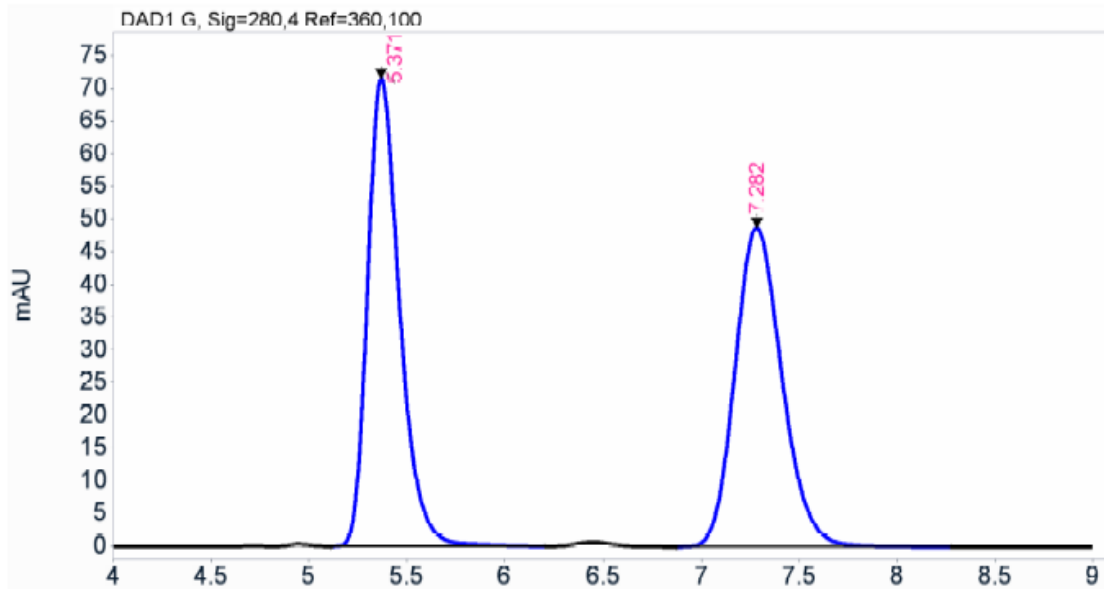

Signal: DAD1 G, Sig=280,4 Ref=360,100

| RT [min] | Type | Width [min] | Area    | Height  | Area% |
|----------|------|-------------|---------|---------|-------|
| 5.371    | BB   | 0.1750      | 816.194 | 71.5697 | 50.00 |
| 7.282    | BB   | 0.2589      | 816.158 | 48.8433 | 50.00 |

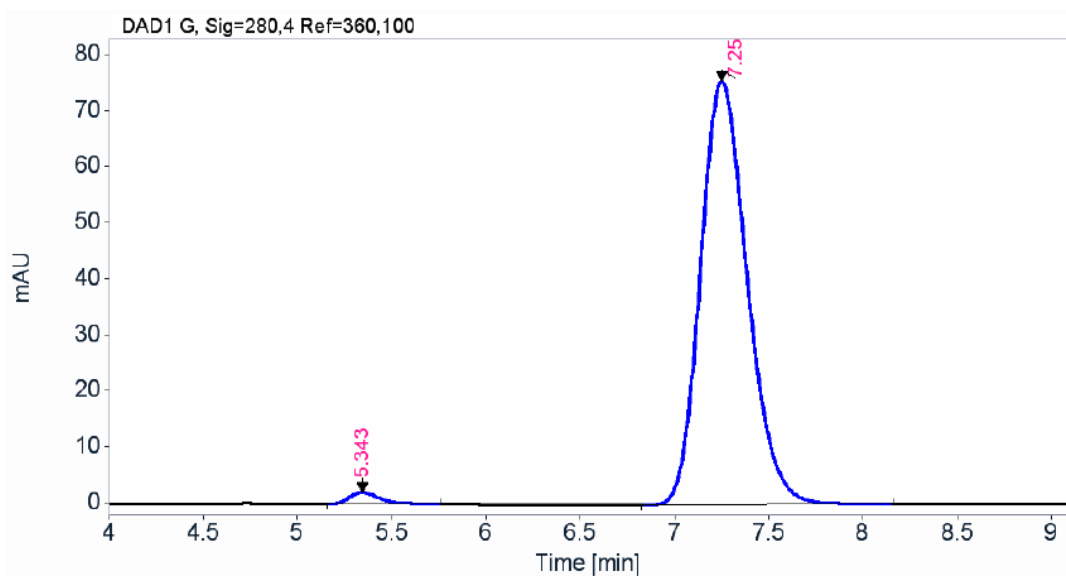

Signal: DAD1 G, Sig=280,4 Ref=360,100

| RT [min] | Type | Width [min] | Area     | Height  | Area% |
|----------|------|-------------|----------|---------|-------|
| 5.343    | BB   | 0.1722      | 23.151   | 2.0430  | 1.75  |
| 7.250    | BB   | 0.2668      | 1301.336 | 75.6090 | 98.25 |

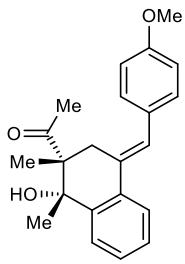

2h

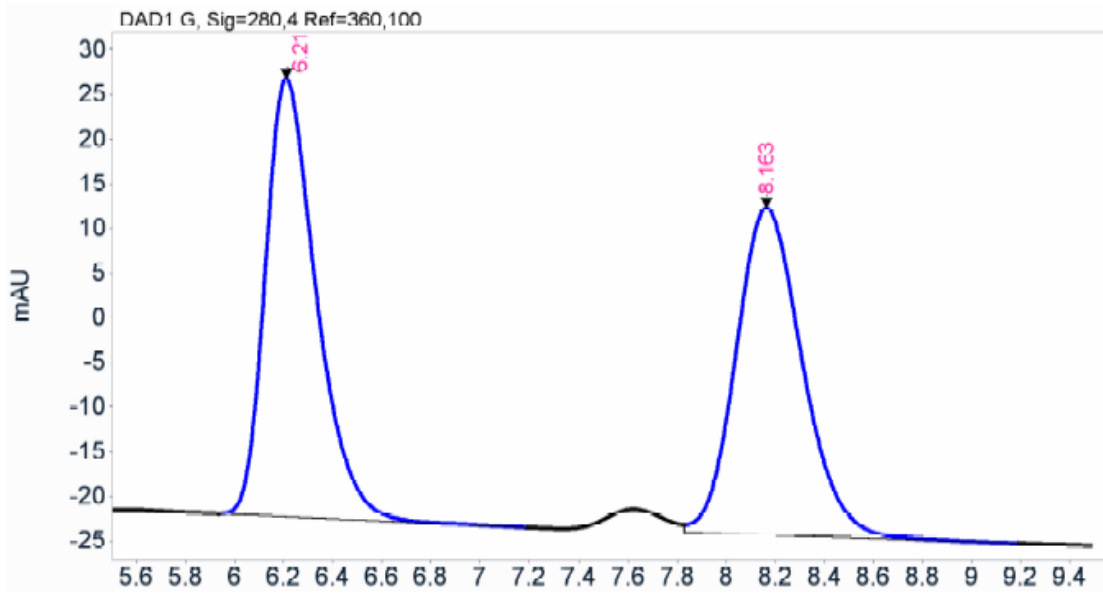

Signal: DAD1 G, Sig=280,4 Ref=360,100

| RT [min] | Type | Width [min] | Area    | Height  | Area% |
|----------|------|-------------|---------|---------|-------|
| 6.210    | BB   | 0.2199      | 705.808 | 49.0429 | 50.54 |
| 8.163    | VB   | 0.2919      | 690.835 | 36.6498 | 49.46 |

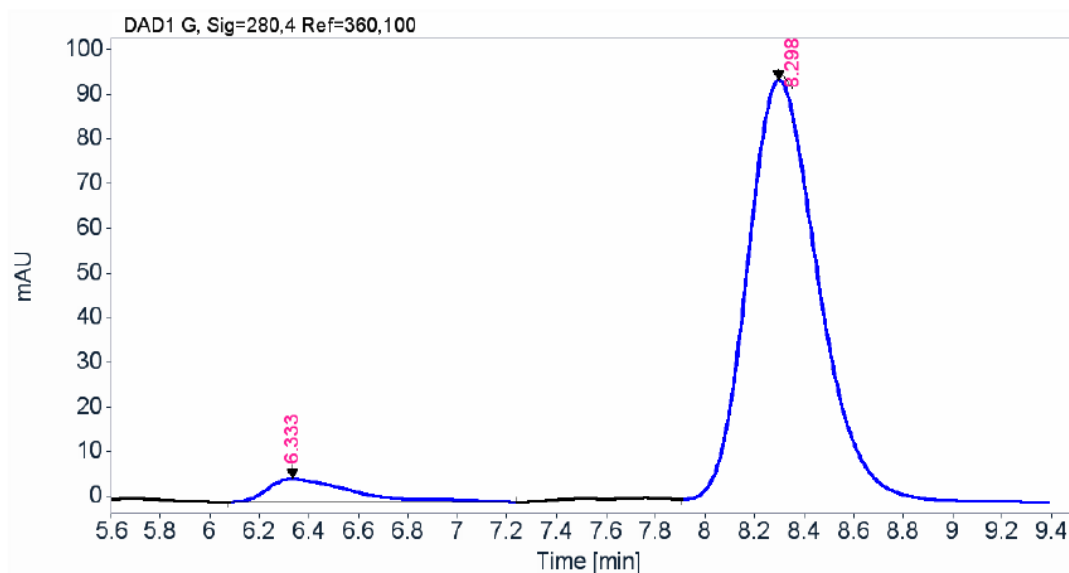

Signal: DAD1 G, Sig=280,4 Ref=360,100

| RT [min] | Type | Width [min] | Area     | Height  | Area% |
|----------|------|-------------|----------|---------|-------|
| 6.333    | BB   | 0.3215      | 119.517  | 5.1742  | 6.07  |
| 8.298    | BB   | 0.3056      | 1848.811 | 93.9347 | 93.93 |



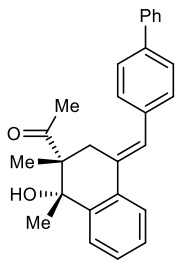

2i

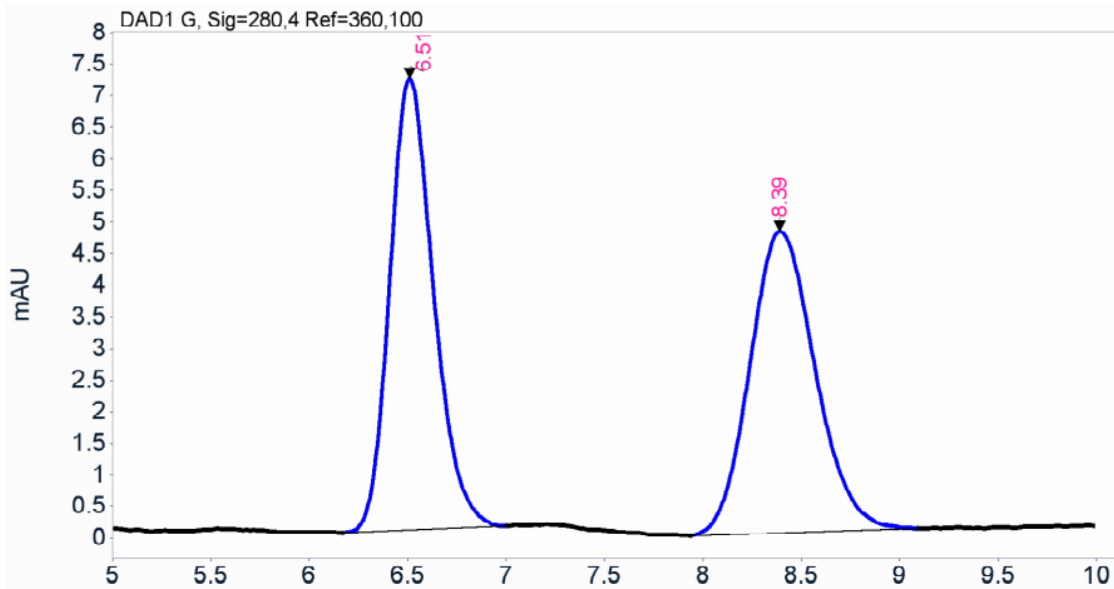

Signal: DAD1 G, Sig=280,4 Ref=360,100

| RT [min] | Type | Width [min] | Area    | Height | Area% |
|----------|------|-------------|---------|--------|-------|
| 6.510    | BB   | 0.2379      | 110.278 | 7.1515 | 50.13 |
| 8.390    | BB   | 0.3503      | 109.707 | 4.7710 | 49.87 |

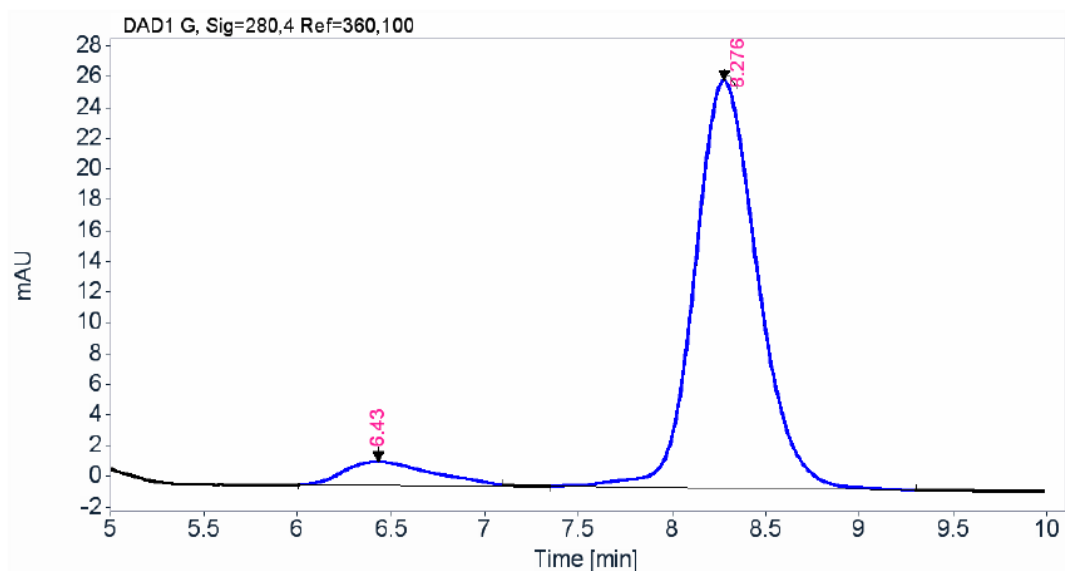

Signal: DAD1 G, Sig=280,4 Ref=360,100

| RT [min] | Type | Width [min] | Area    | Height  | Area% |
|----------|------|-------------|---------|---------|-------|
| 6.430    | MM   | 0.5427      | 50.668  | 1.5562  | 7.62  |
| 8.276    | BB   | 0.3565      | 614.304 | 26.4922 | 92.38 |

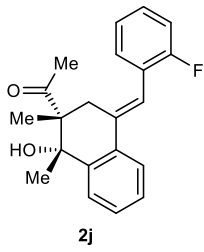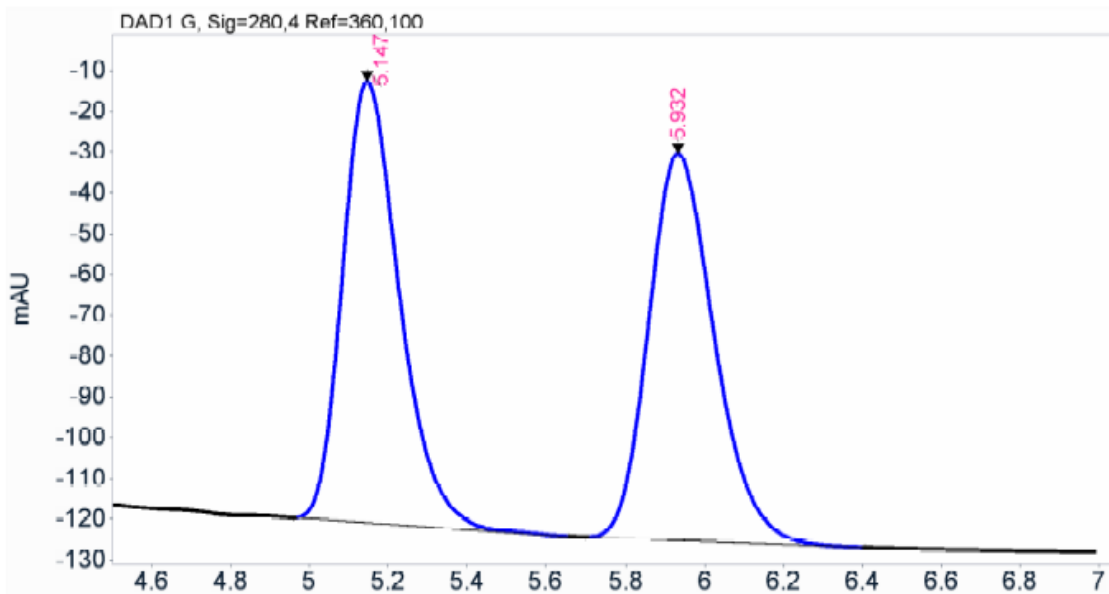

Signal: DAD1 G, Sig=280,4 Ref=360,100

| RT [min] | Type | Width [min] | Area     | Height   | Area% |
|----------|------|-------------|----------|----------|-------|
| 5.147    | BB   | 0.1553      | 1088.631 | 108.2370 | 49.76 |
| 5.932    | BB   | 0.1791      | 1099.151 | 94.9196  | 50.24 |

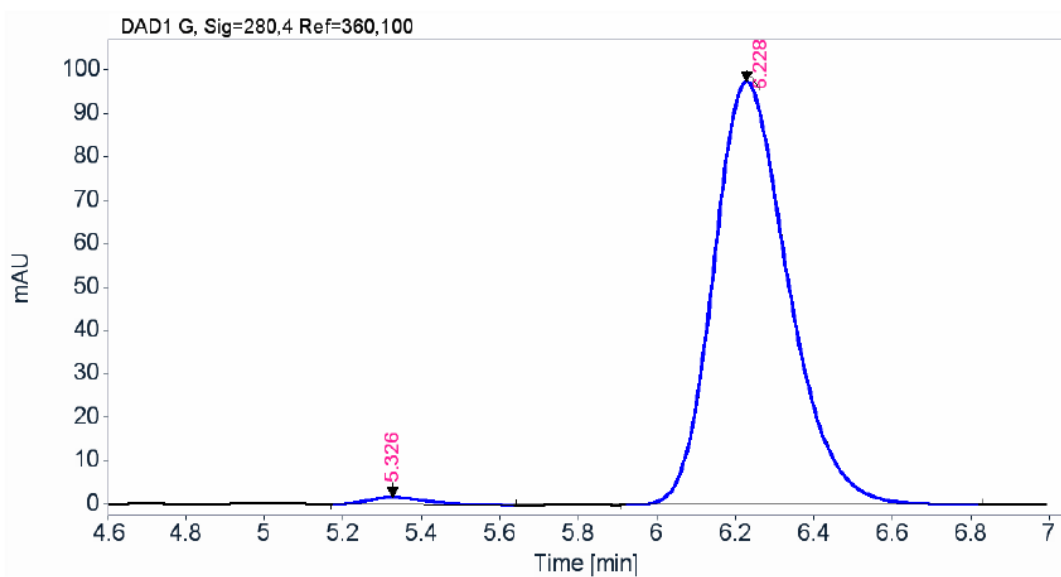

Signal: DAD1 G, Sig=280,4 Ref=360,100

| RT [min] | Type | Width [min] | Area     | Height  | Area% |
|----------|------|-------------|----------|---------|-------|
| 5.326    | BB   | 0.1616      | 17.168   | 1.6468  | 1.32  |
| 6.228    | BB   | 0.2040      | 1286.342 | 97.4244 | 98.68 |

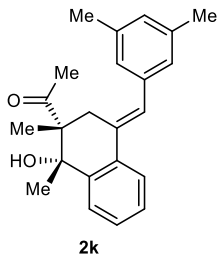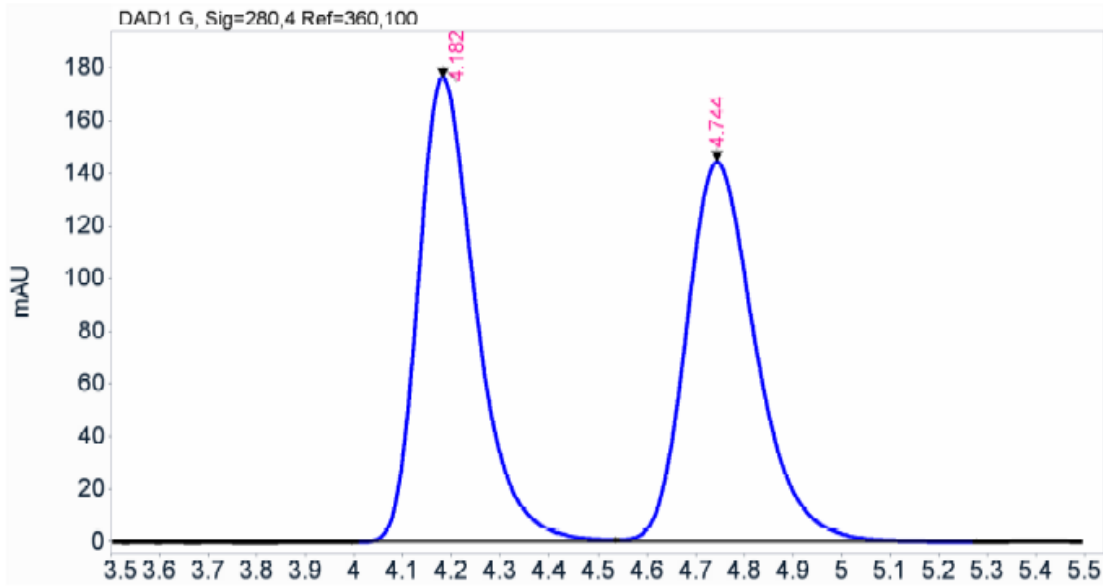

Signal: DAD1 G, Sig=280,4 Ref=360,100

| RT [min] | Type | Width [min] | Area     | Height   | Area% |
|----------|------|-------------|----------|----------|-------|
| 4.182    | BV   | 0.1260      | 1452.526 | 176.5803 | 50.33 |
| 4.744    | VB   | 0.1539      | 1433.747 | 144.3077 | 49.67 |

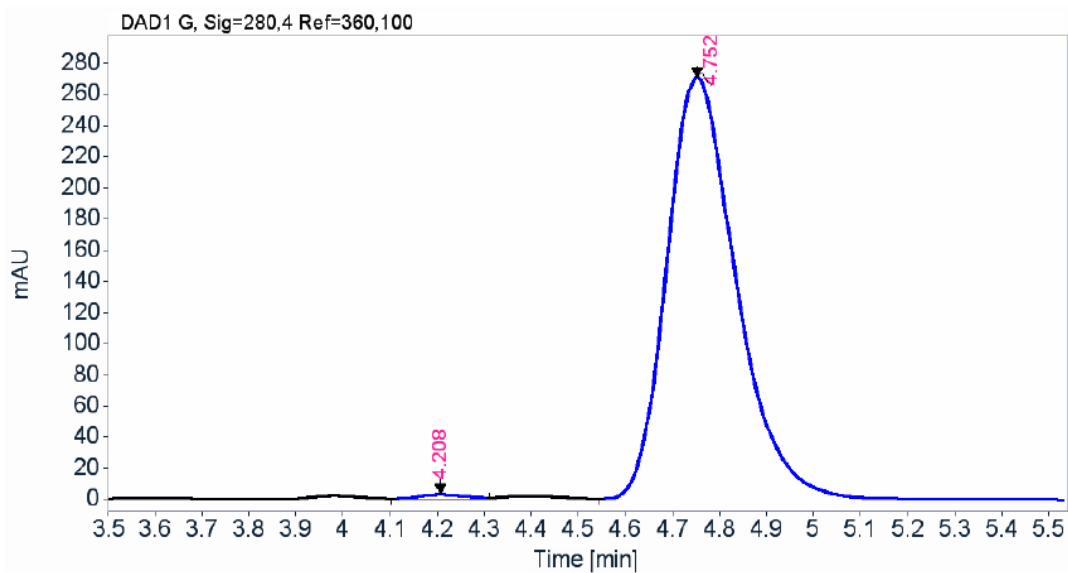

Signal: DAD1 G, Sig=280,4 Ref=360,100

| RT [min] | Type | Width [min] | Area     | Height   | Area% |
|----------|------|-------------|----------|----------|-------|
| 4.208    | BV   | 0.1101      | 19.138   | 2.7877   | 0.68  |
| 4.752    | VB   | 0.1577      | 2779.416 | 270.8972 | 99.32 |

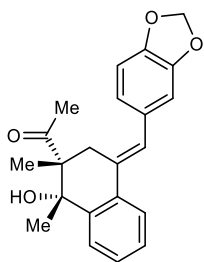

21

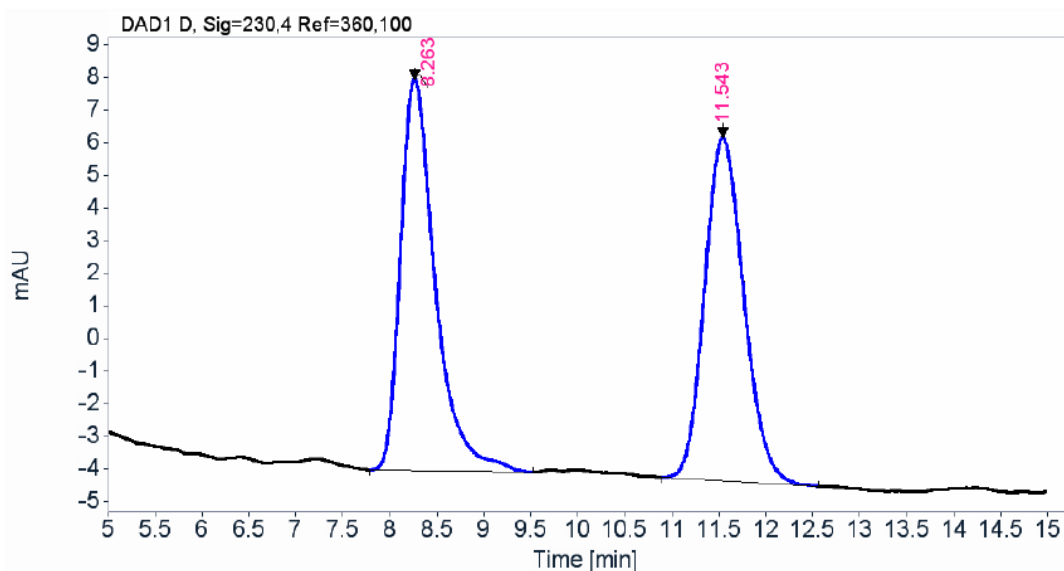

Signal: DAD1 D, Sig=230,4 Ref=360,100

| RT [min] | Type | Width [min] | Area    | Height  | Area% |
|----------|------|-------------|---------|---------|-------|
| 8.263    | BB   | 0.3877      | 307.980 | 11.9899 | 50.16 |
| 11.543   | BB   | 0.4536      | 306.069 | 10.5139 | 49.84 |

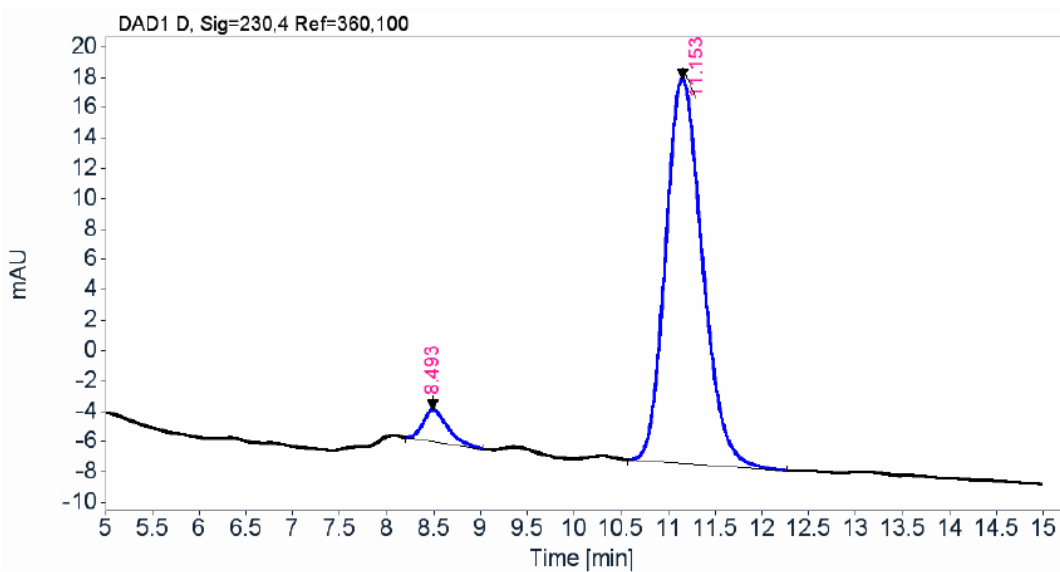

Signal: DAD1 D, Sig=230,4 Ref=360,100

| RT [min] | Type | Width [min] | Area    | Height  | Area% |
|----------|------|-------------|---------|---------|-------|
| 8.493    | BB   | 0.2625      | 38.115  | 2.0728  | 5.22  |
| 11.153   | BB   | 0.4205      | 691.966 | 25.3479 | 94.78 |

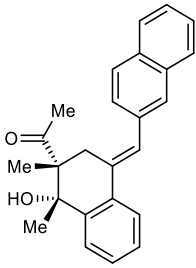

2m

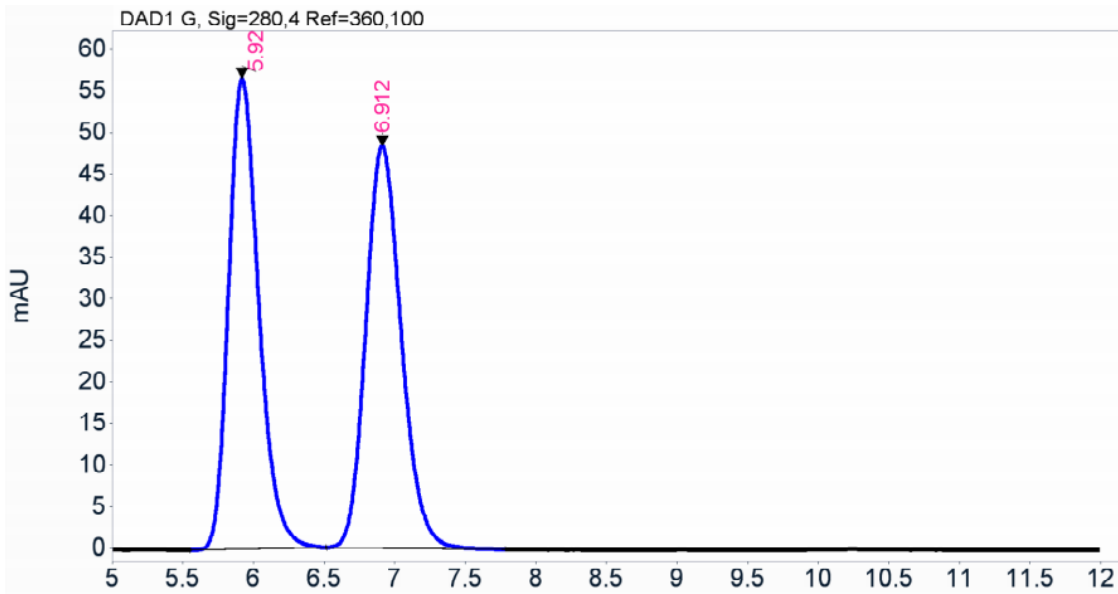

Signal: DAD1 G, Sig=280,4 Ref=360,100

| RT [min] | Type | Width [min] | Area    | Height  | Area% |
|----------|------|-------------|---------|---------|-------|
| 5.920    | BB   | 0.2286      | 837.386 | 56.6094 | 49.92 |
| 6.912    | BB   | 0.2690      | 840.118 | 48.2851 | 50.08 |

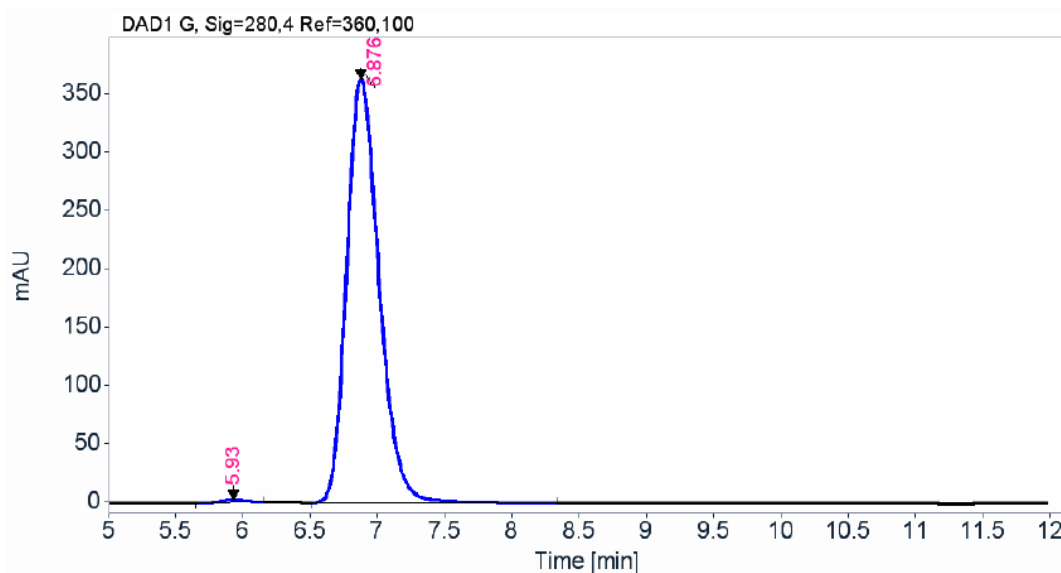

Signal: DAD1 G, Sig=280,4 Ref=360,100

| RT [min] | Type | Width [min] | Area     | Height   | Area% |
|----------|------|-------------|----------|----------|-------|
| 5.930    | BB   | 0.1988      | 28.923   | 2.3958   | 0.47  |
| 6.876    | BB   | 0.2593      | 6074.113 | 362.8996 | 99.53 |

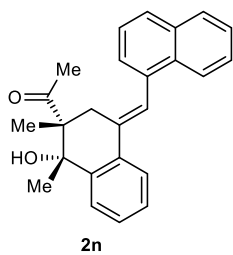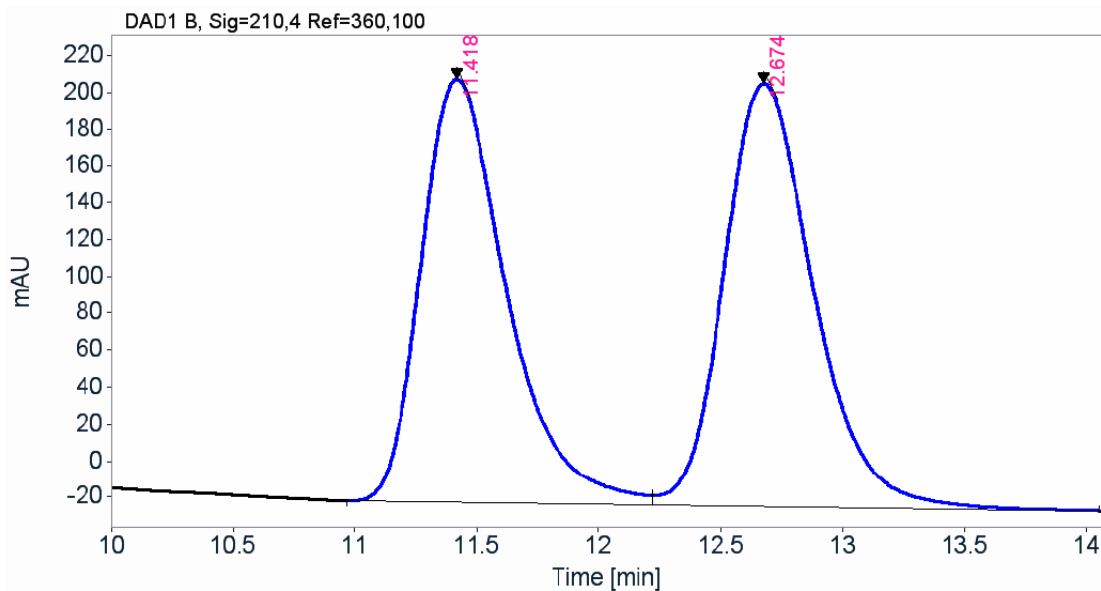

Signal: DAD1 B, Sig=210,4 Ref=360,100

| RT [min] | Type | Width [min] | Area     | Height   | Area% |
|----------|------|-------------|----------|----------|-------|
| 11.418   | BV   | 0.3708      | 5620.365 | 230.2351 | 48.85 |
| 12.674   | VB   | 0.3925      | 5885.084 | 230.0381 | 51.15 |

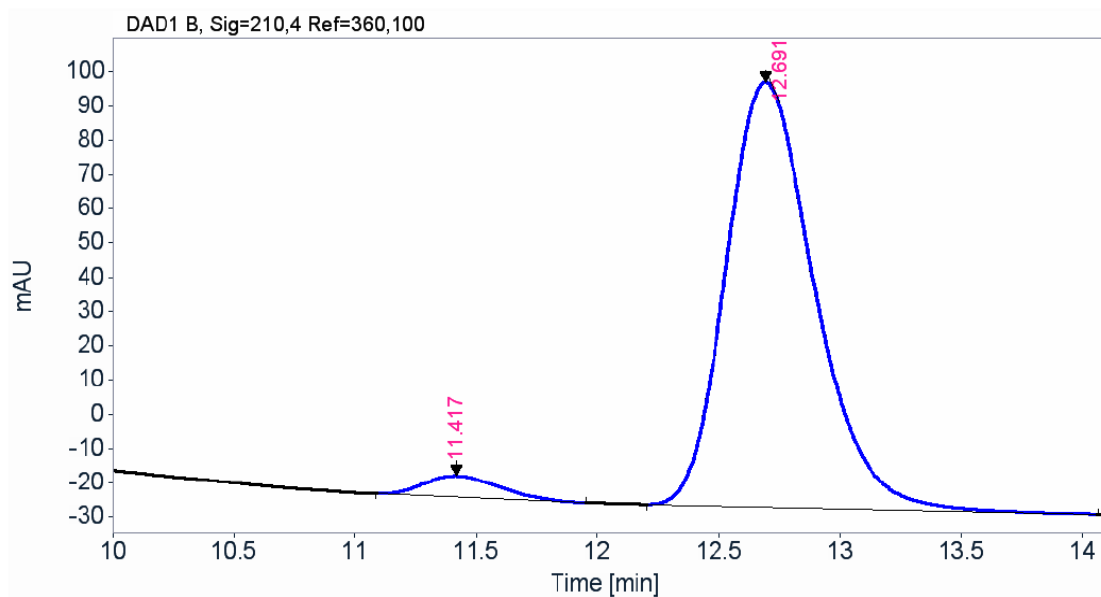

Signal: DAD1 B, Sig=210,4 Ref=360,100

| RT [min] | Type | Width [min] | Area     | Height   | Area% |
|----------|------|-------------|----------|----------|-------|
| 11.417   | BB   | 0.3340      | 138.194  | 6.2987   | 4.21  |
| 12.691   | BB   | 0.3914      | 3142.159 | 124.1093 | 95.79 |

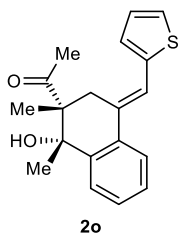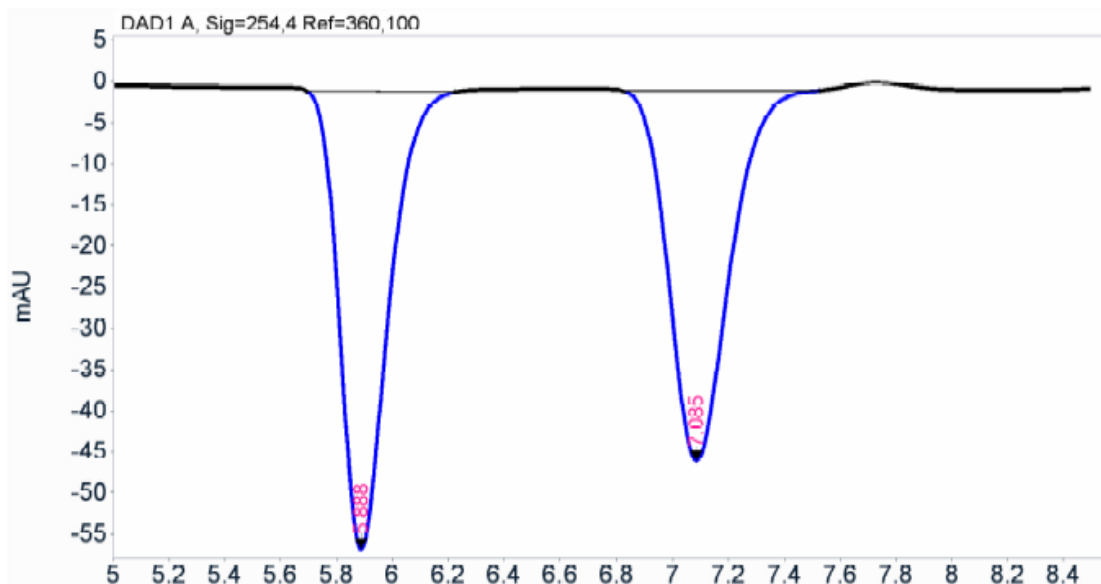

Signal: DAD1 A, Sig=254,4 Ref=360,100

| RT [min] | Type | Width [min] | Area    | Height  | Area% |
|----------|------|-------------|---------|---------|-------|
| 5.888    | PP N | 0.1877      | 626.524 | 55.6463 | 49.67 |
| 7.085    | PP N | 0.2353      | 634.799 | 44.9588 | 50.33 |

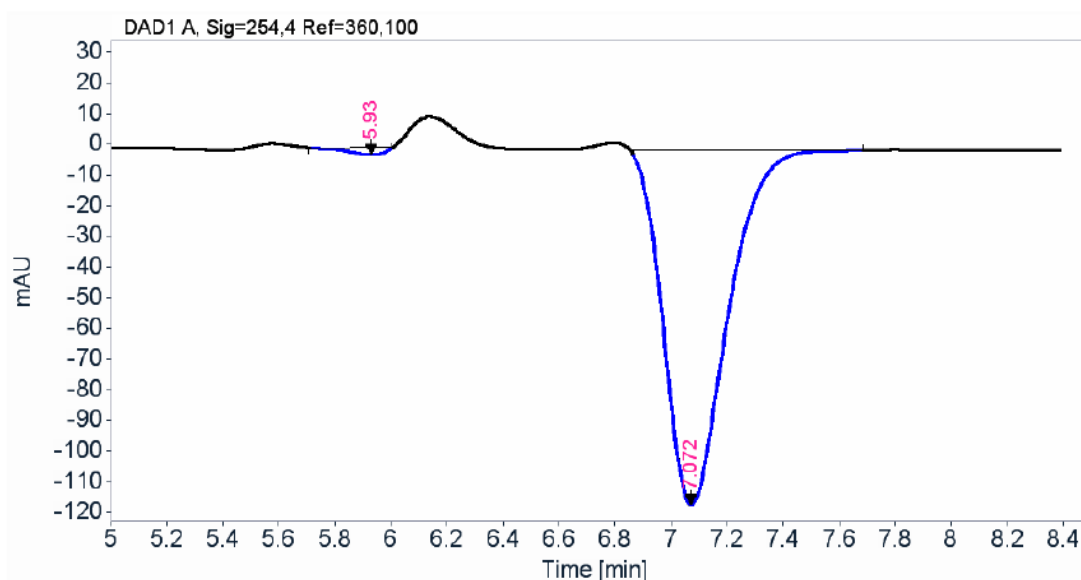

Signal: DAD1 A, Sig=254,4 Ref=360,100

| RT [min] | Type | Width [min] | Area     | Height   | Area% |
|----------|------|-------------|----------|----------|-------|
| 5.930    | PM N | 0.1470      | 21.025   | 2.3841   | 1.25  |
| 7.072    | PM N | 0.2399      | 1663.862 | 115.6015 | 98.75 |

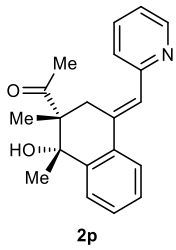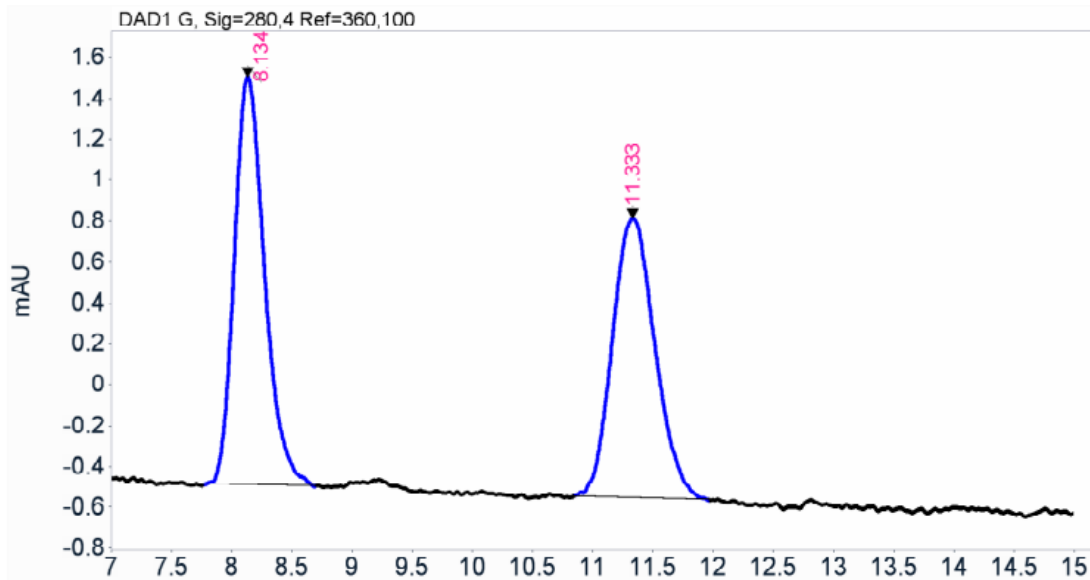

Signal: DAD1 G, Sig=280,4 Ref=360,100

| RT [min] | Type | Width [min] | Area   | Height | Area% |
|----------|------|-------------|--------|--------|-------|
| 8.134    | MM   | 0.2909      | 34.667 | 1.9863 | 50.84 |
| 11.333   | MM   | 0.4095      | 33.517 | 1.3641 | 49.16 |

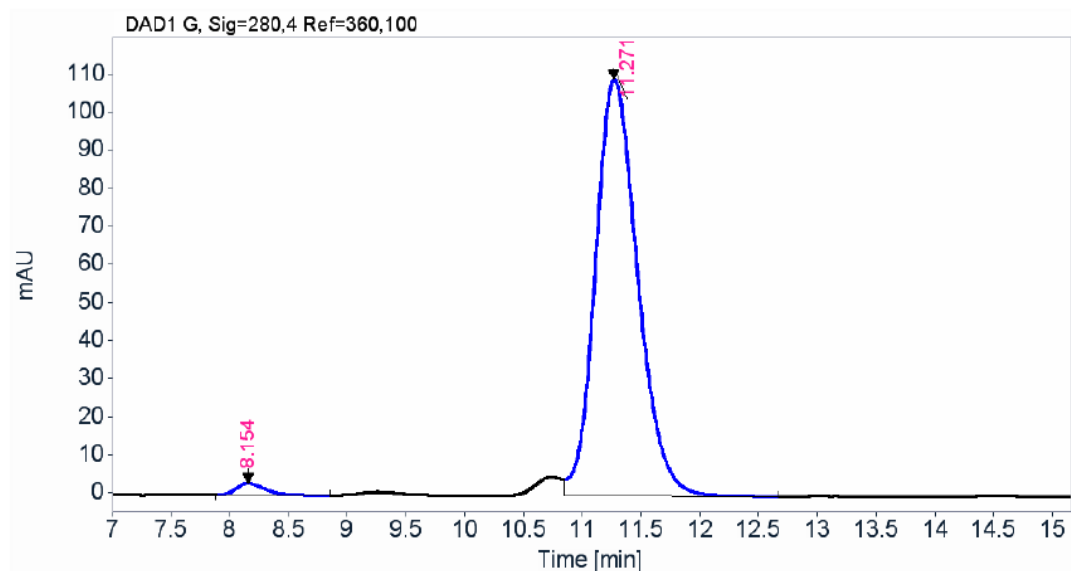

Signal: DAD1 G, Sig=280,4 Ref=360,100

| RT [min] | Type | Width [min] | Area     | Height   | Area% |
|----------|------|-------------|----------|----------|-------|
| 8.154    | BB   | 0.2554      | 50.928   | 3.0721   | 1.82  |
| 11.271   | VB   | 0.3862      | 2741.028 | 109.4345 | 98.18 |



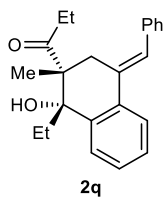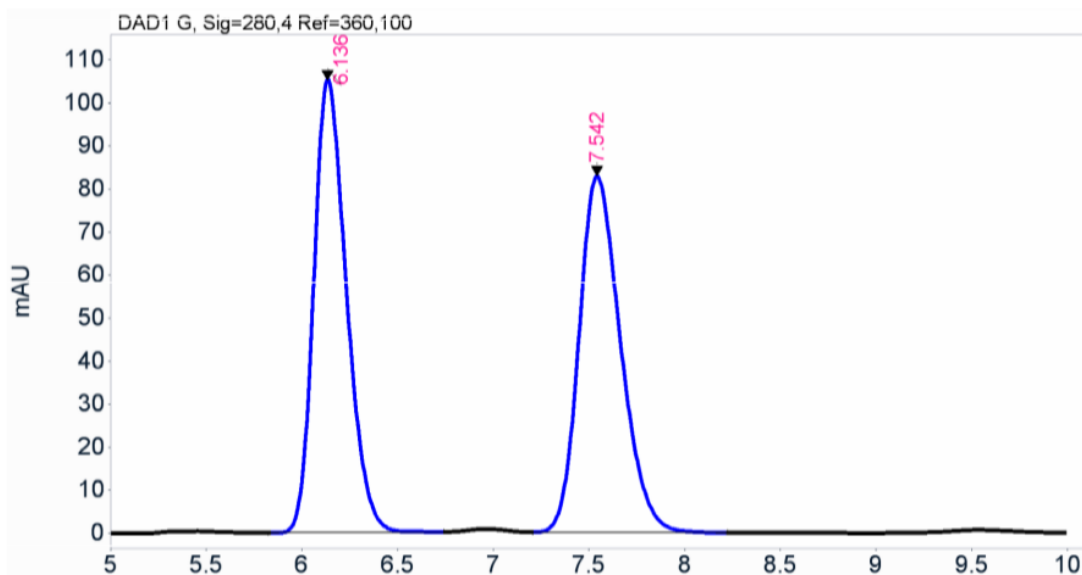

Signal: DAD1 G, Sig=280,4 Ref=360,100

| RT [min] | Type | Width [min] | Area     | Height   | Area% |
|----------|------|-------------|----------|----------|-------|
| 6.136    | BB   | 0.1842      | 1246.087 | 105.1695 | 49.98 |
| 7.542    | BB   | 0.2297      | 1246.845 | 82.7754  | 50.02 |

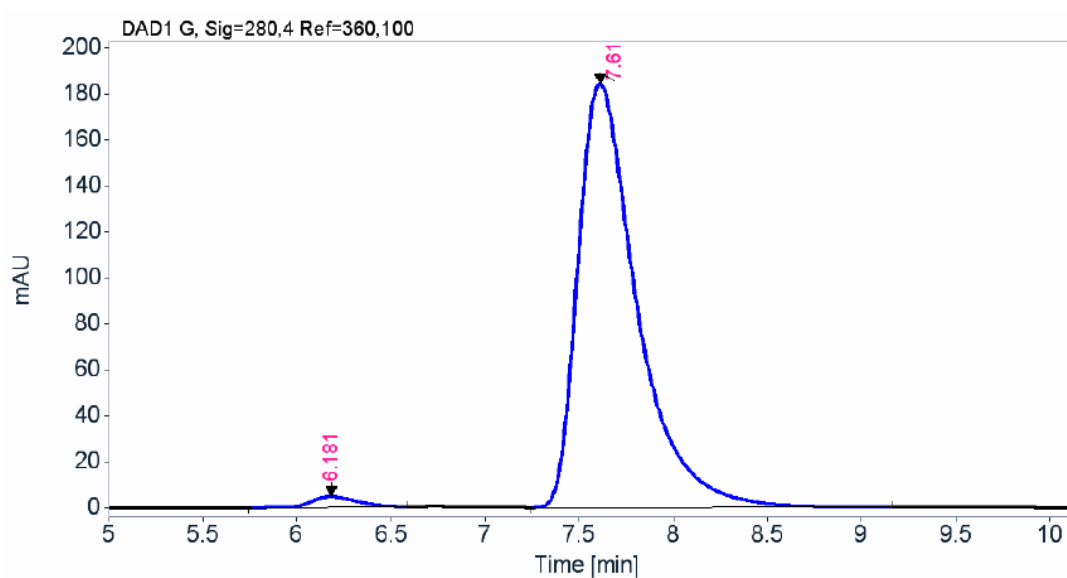

Signal: DAD1 G, Sig=280,4 Ref=360,100

| RT [min] | Type | Width [min] | Area     | Height   | Area% |
|----------|------|-------------|----------|----------|-------|
| 6.181    | BB   | 0.2629      | 76.907   | 4.5110   | 1.88  |
| 7.610    | BB   | 0.3286      | 4018.512 | 184.1144 | 98.12 |

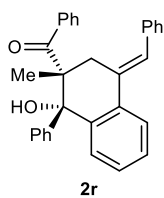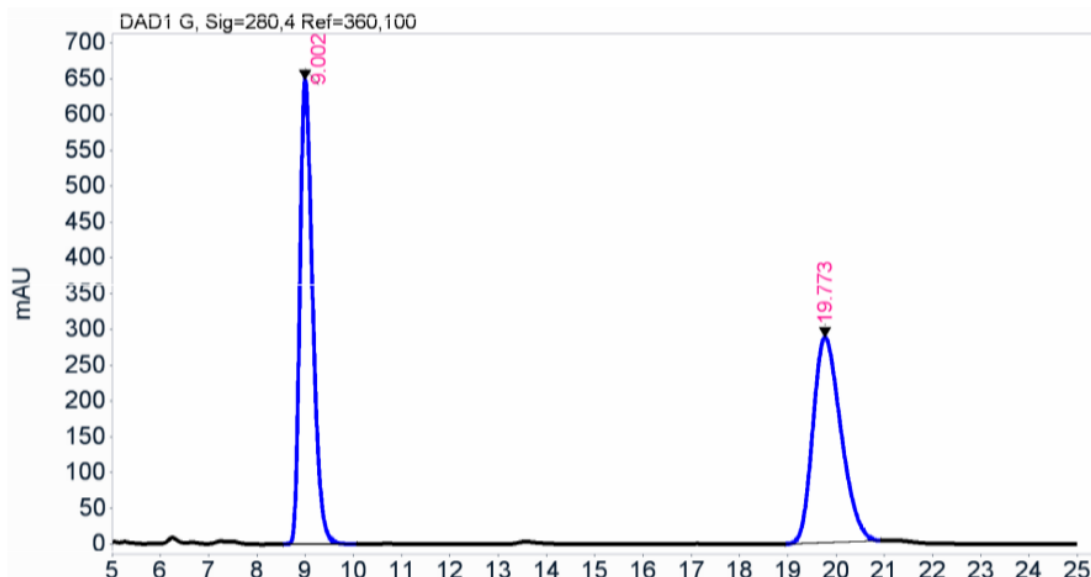

Signal: DAD1 G, Sig=280,4 Ref=360,100

| RT [min] | Type | Width [min] | Area      | Height   | Area% |
|----------|------|-------------|-----------|----------|-------|
| 9.002    | BB   | 0.2850      | 11934.448 | 647.6667 | 50.81 |
| 19.773   | BB   | 0.6266      | 11553.501 | 286.3935 | 49.19 |

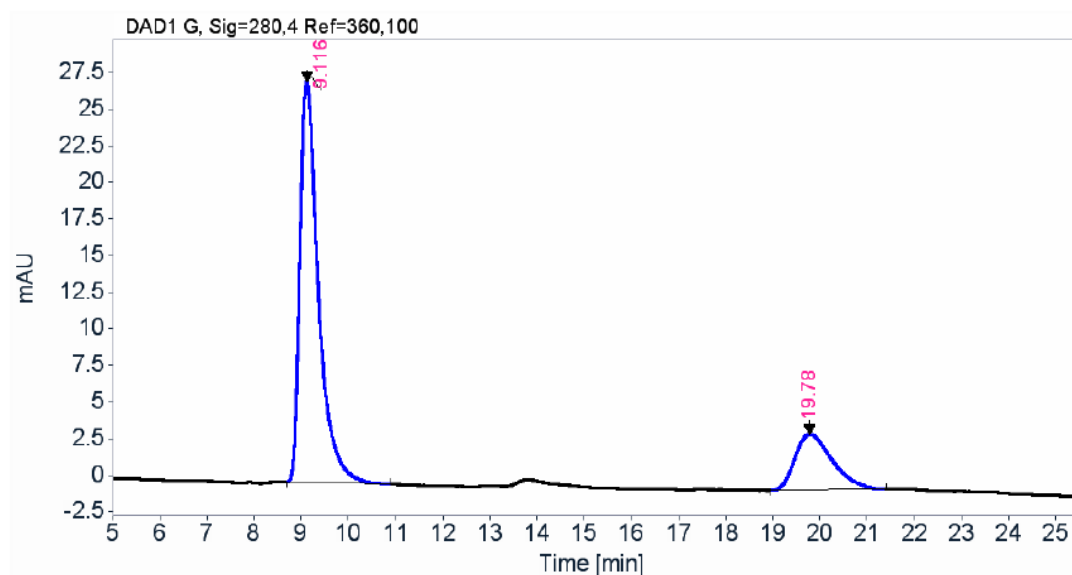

Signal: DAD1 G, Sig=280,4 Ref=360,100

| RT [min] | Type | Width [min] | Area    | Height  | Area% |
|----------|------|-------------|---------|---------|-------|
| 9.116    | BB   | 0.4064      | 747.049 | 27.3762 | 78.07 |
| 19.780   | BB   | 0.6852      | 209.815 | 3.8058  | 21.93 |

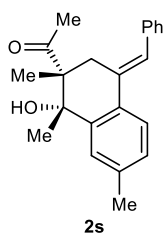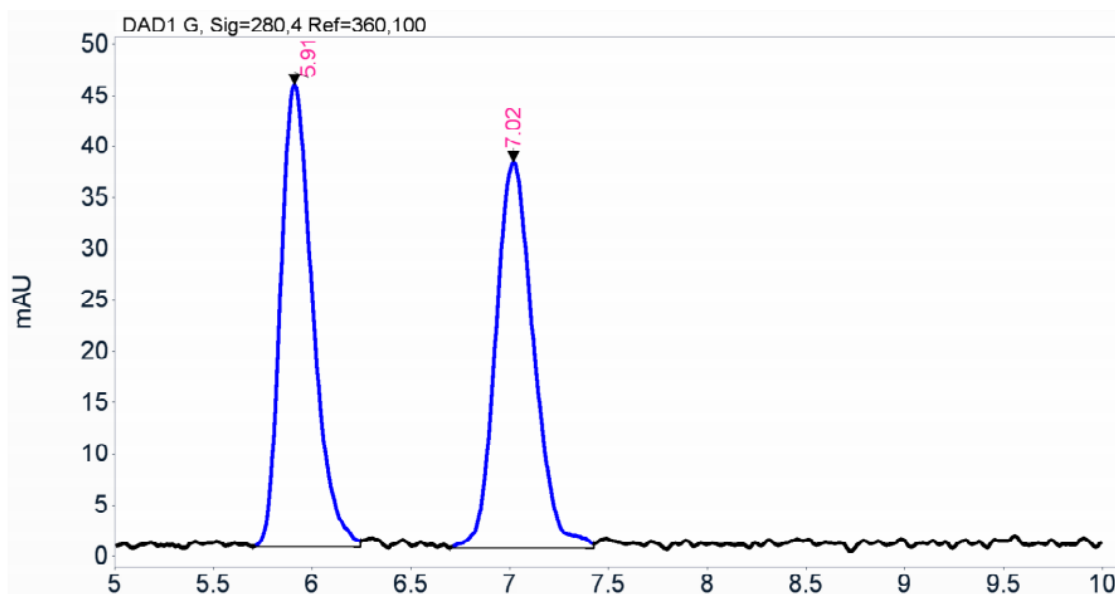

Signal: DAD1 G, Sig=280,4 Ref=360,100

| RT [min] | Type | Width [min] | Area    | Height  | Area% |
|----------|------|-------------|---------|---------|-------|
| 5.910    | BV   | 0.1693      | 508.823 | 45.2115 | 50.33 |
| 7.020    | BV   | 0.2032      | 502.080 | 37.7338 | 49.67 |

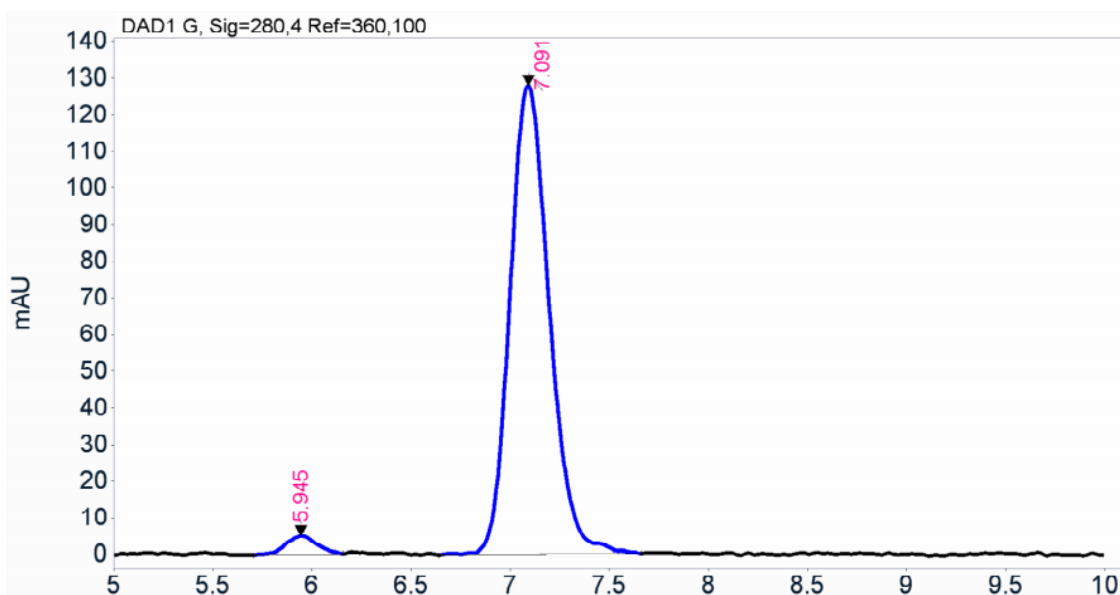

Signal: DAD1 G, Sig=280,4 Ref=360,100

| RT [min] | Type | Width [min] | Area     | Height   | Area% |
|----------|------|-------------|----------|----------|-------|
| 5.945    | BV   | 0.1512      | 56.946   | 5.2228   | 3.12  |
| 7.091    | VB   | 0.2110      | 1767.300 | 128.0538 | 96.88 |

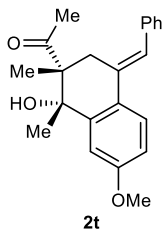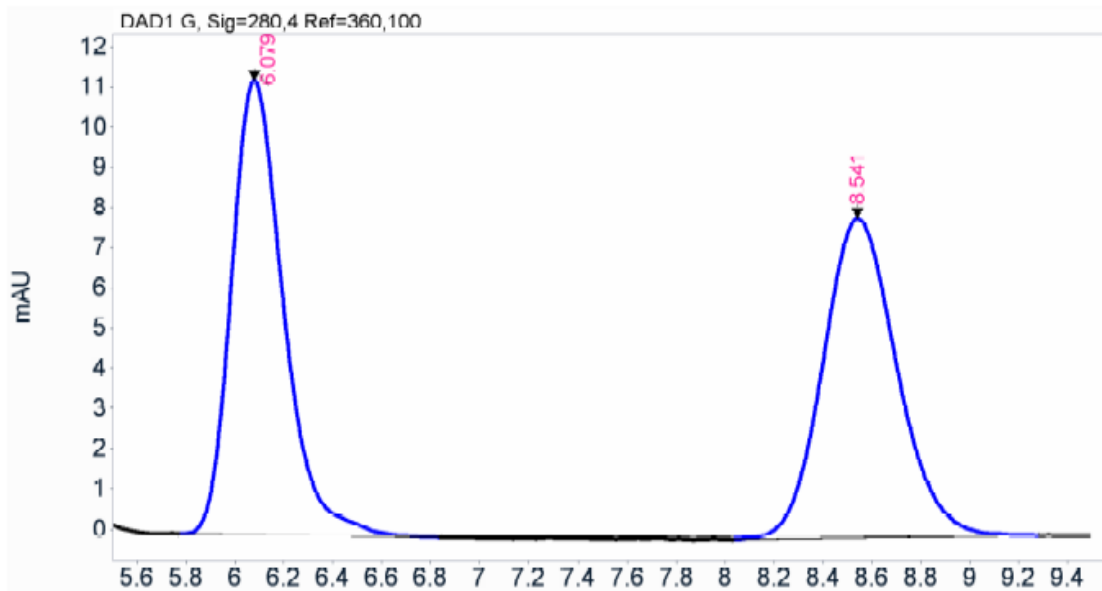

Signal: DAD1 G, Sig=280,4 Ref=360,100

| RT [min] | Type | Width [min] | Area    | Height  | Area% |
|----------|------|-------------|---------|---------|-------|
| 6.079    | BB   | 0.2281      | 166.735 | 11.3038 | 50.01 |
| 8.541    | BB   | 0.3266      | 166.642 | 7.9484  | 49.99 |

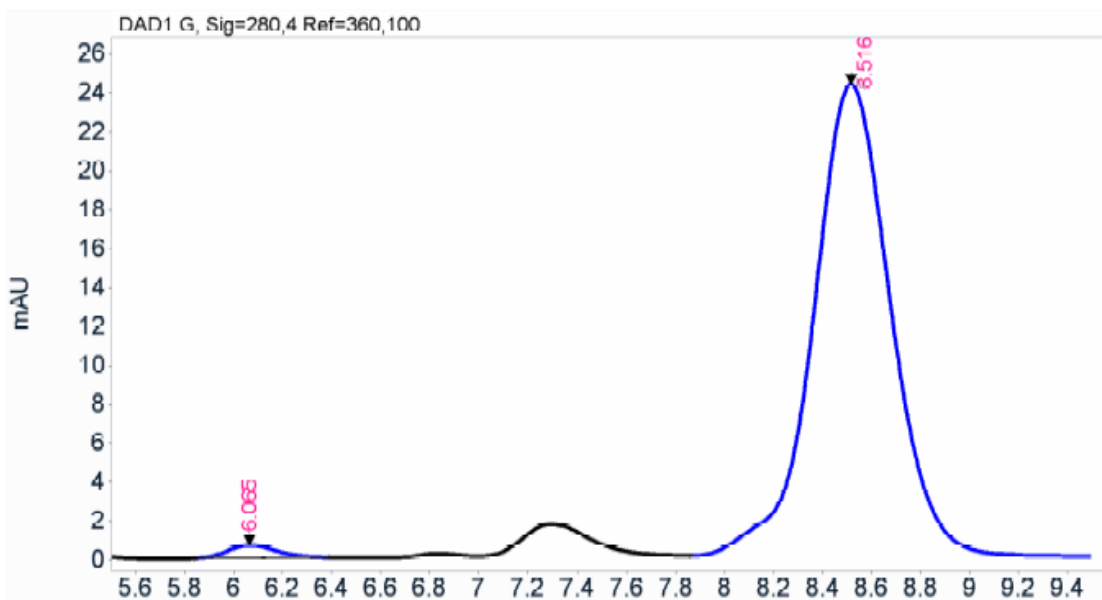

Signal: DAD1 G, Sig=280,4 Ref=360,100

| RT [min] | Type | Width [min] | Area    | Height  | Area% |
|----------|------|-------------|---------|---------|-------|
| 6.065    | MM   | 0.2370      | 9.691   | 0.6816  | 1.80  |
| 8.516    | BB   | 0.3348      | 529.367 | 24.2407 | 98.20 |

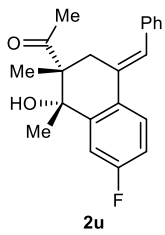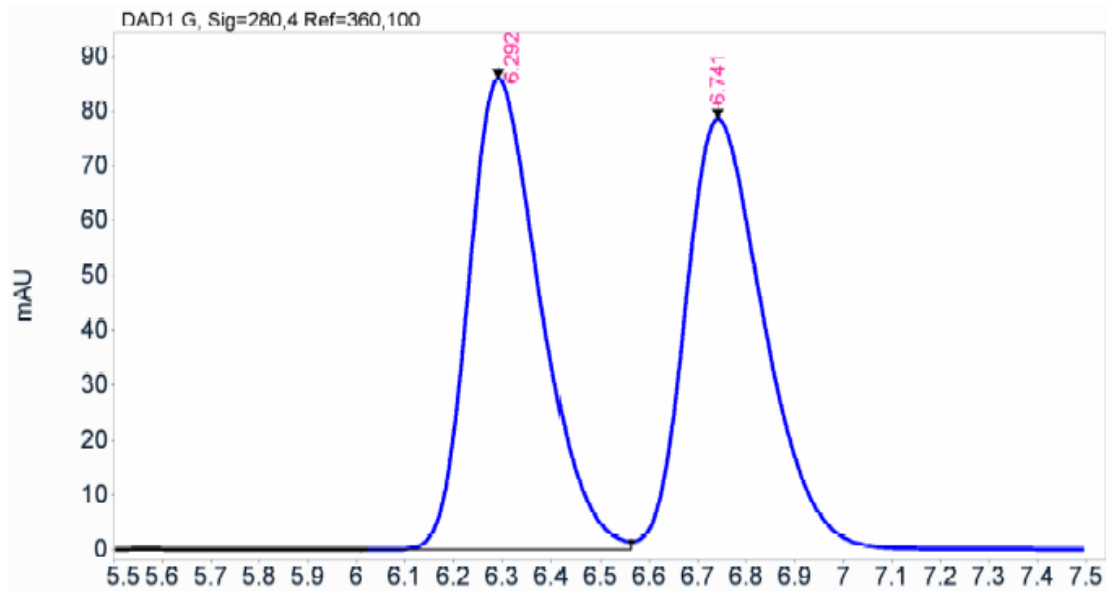

Signal: DAD1 G, Sig=280,4 Ref=360,100

| RT [min] | Type | Width [min] | Area    | Height  | Area% |
|----------|------|-------------|---------|---------|-------|
| 6.292    | BV   | 0.1548      | 875.644 | 85.9695 | 49.83 |
| 6.741    | VB   | 0.1727      | 881.725 | 78.6782 | 50.17 |

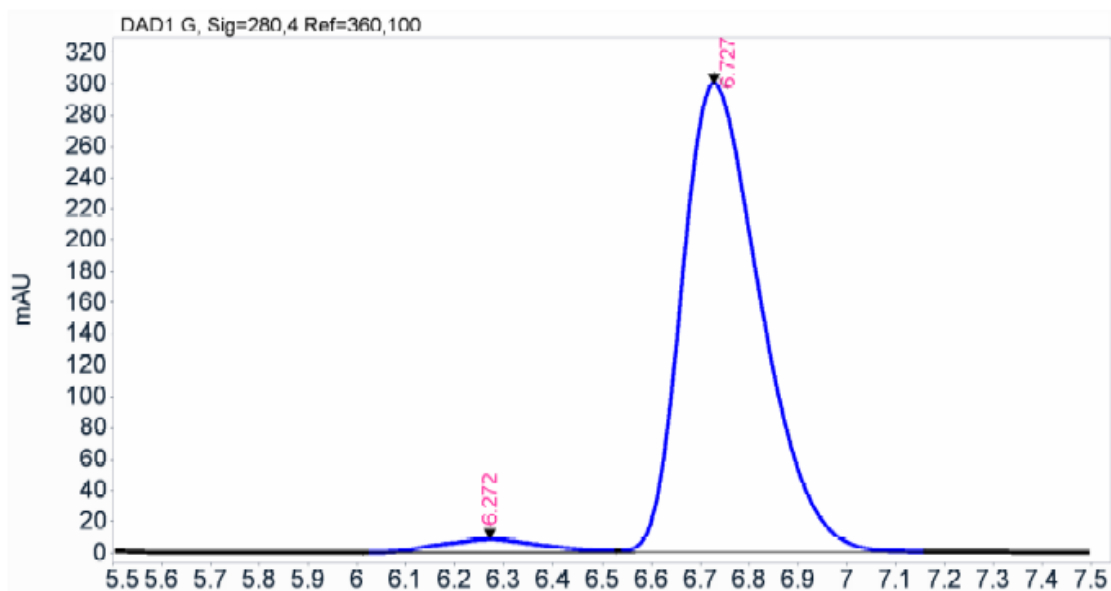

Signal: DAD1 G, Sig=280,4 Ref=360,100

| RT [min] | Type | Width [min] | Area     | Height   | Area% |
|----------|------|-------------|----------|----------|-------|
| 6.272    | BV   | 0.2017      | 118.889  | 8.2686   | 3.43  |
| 6.727    | VB   | 0.1722      | 3345.227 | 299.8261 | 96.57 |

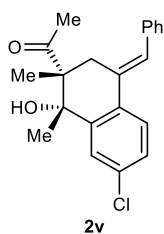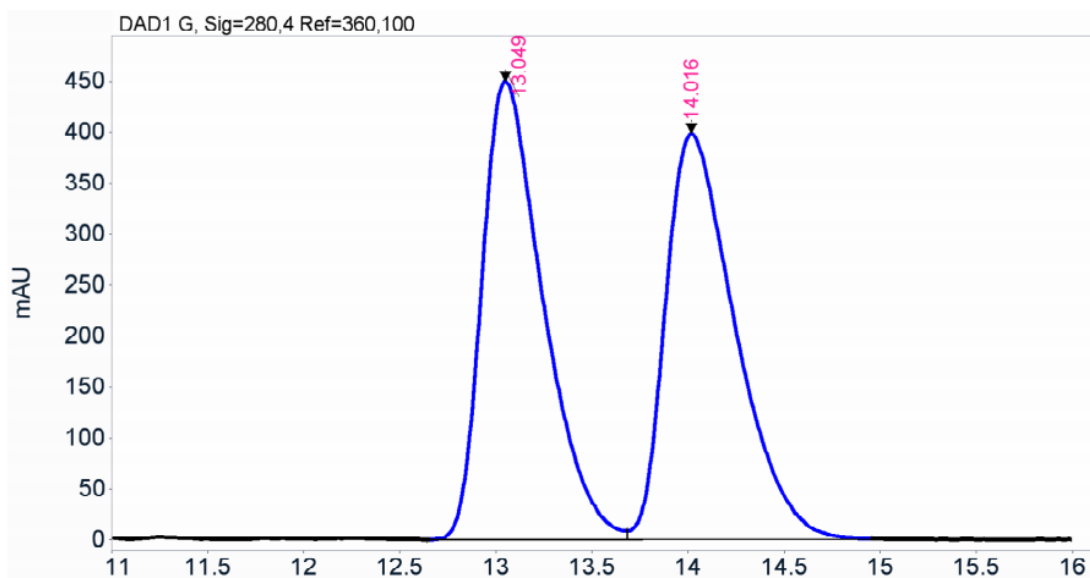

Signal: DAD1 G, Sig=280,4 Ref=360,100

| RT [min] | Type | Width [min] | Area      | Height   | Area% |
|----------|------|-------------|-----------|----------|-------|
| 13.049   | BV   | 0.3296      | 9933.183  | 449.9369 | 49.80 |
| 14.016   | VV   | 0.3672      | 10013.787 | 398.3950 | 50.20 |

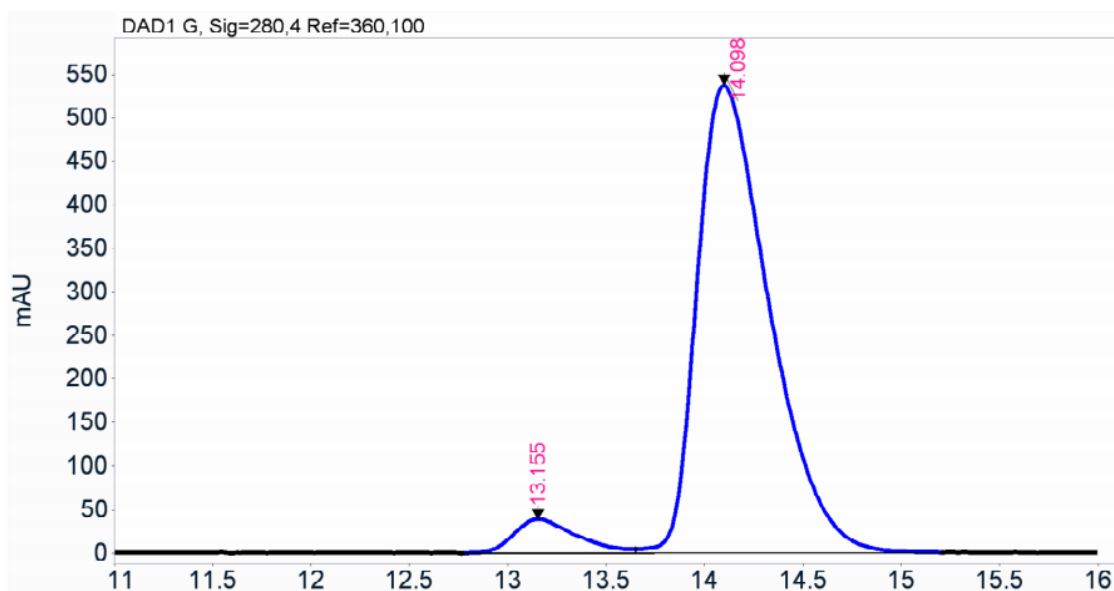

Signal: DAD1 G, Sig=280,4 Ref=360,100

| RT [min] | Type | Width [min] | Area      | Height   | Area% |
|----------|------|-------------|-----------|----------|-------|
| 13.155   | BV   | 0.3152      | 863.853   | 39.1882  | 5.93  |
| 14.098   | VV   | 0.3834      | 13712.933 | 537.9197 | 94.07 |

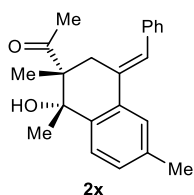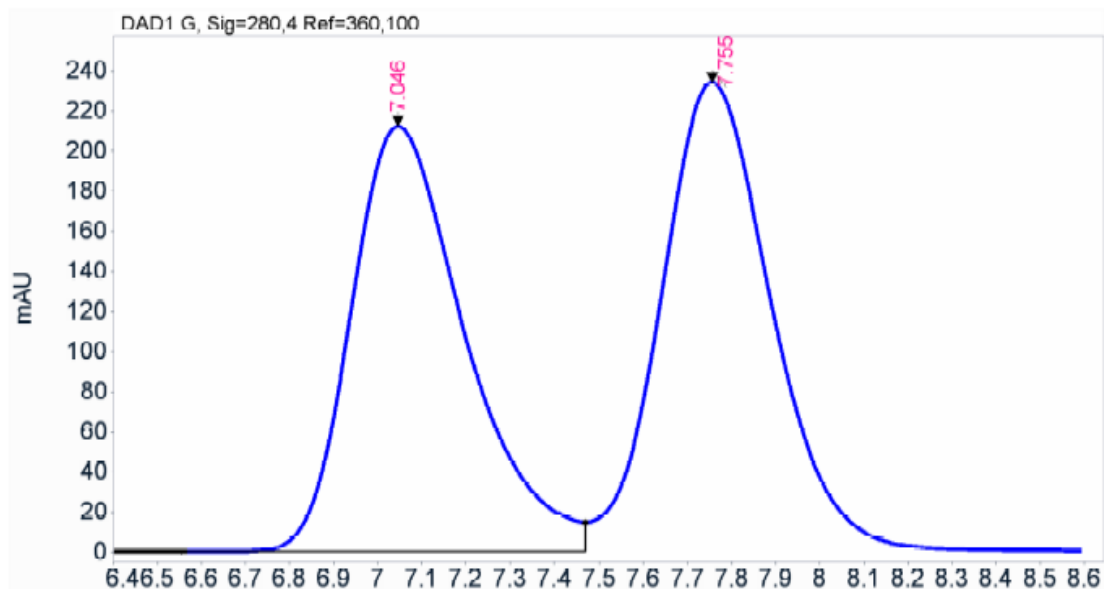

Signal: DAD1 G, Sig=280,4 Ref=360,100

| RT [min] | Type | Width [min] | Area     | Height   | Area% |
|----------|------|-------------|----------|----------|-------|
| 7.046    | BV   | 0.2727      | 3799.888 | 212.3995 | 48.41 |
| 7.755    | VB   | 0.2659      | 4048.956 | 234.0202 | 51.59 |

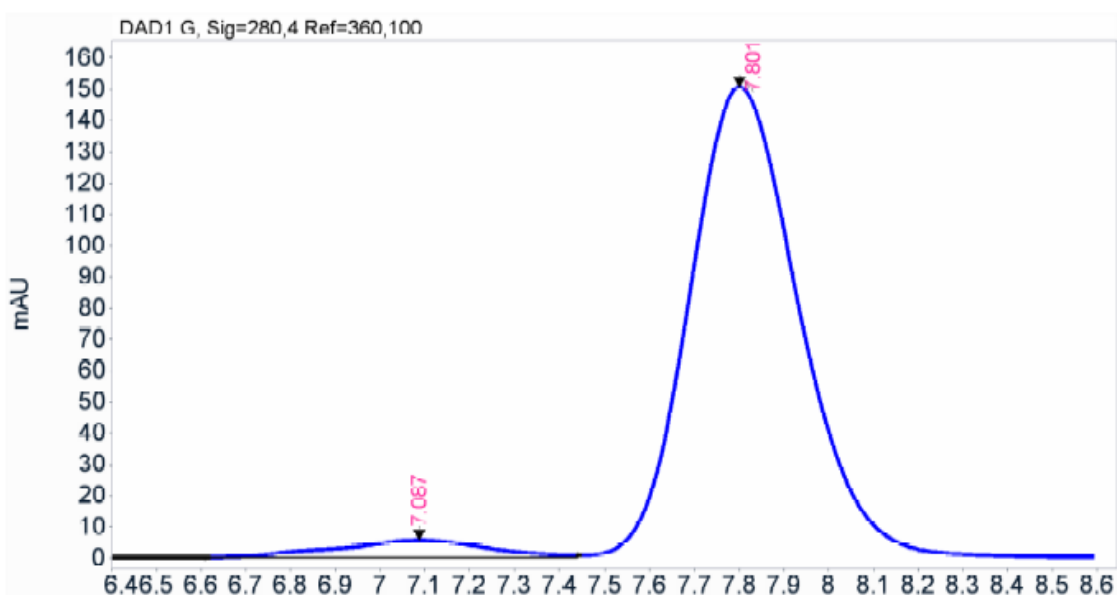

Signal: DAD1 G, Sig=280,4 Ref=360,100

| RT [min] | Type | Width [min] | Area     | Height   | Area% |
|----------|------|-------------|----------|----------|-------|
| 7.087    | BV   | 0.3335      | 127.618  | 5.4832   | 4.76  |
| 7.801    | VB   | 0.2640      | 2553.390 | 150.4275 | 95.24 |

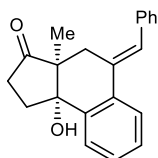

5a

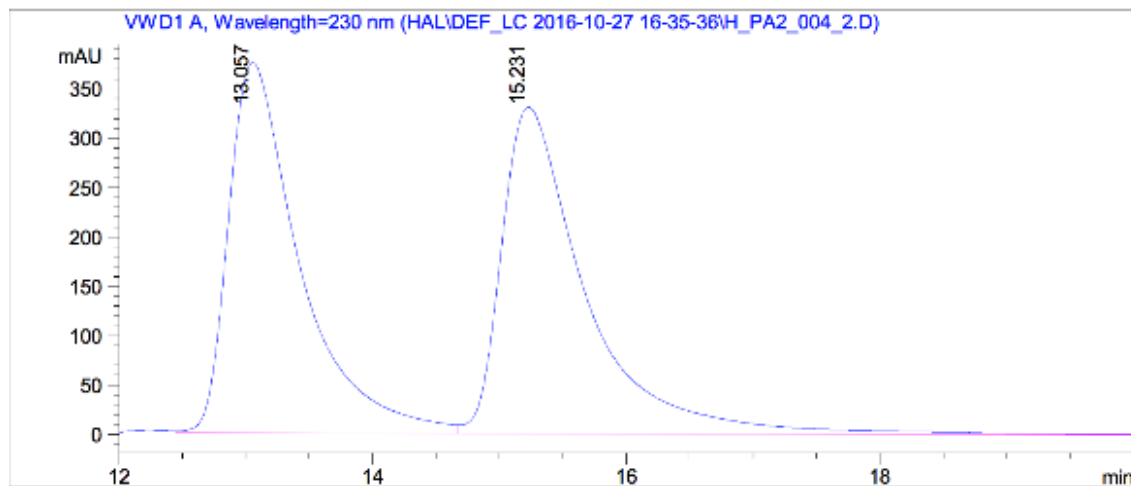

| Meas. R | Area % | Width | Symmetr. |
|---------|--------|-------|----------|
| 13.057  | 48.647 | 0.577 | 0.476    |
| 15.231  | 51.353 | 0.683 | 0.424    |

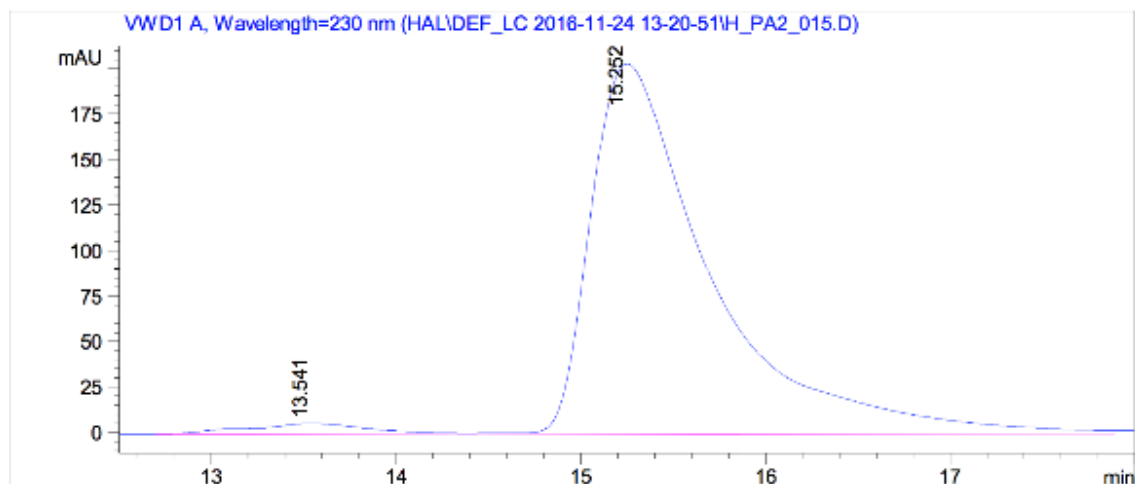

| Meas. R | Area % | Width | Symmetr. |
|---------|--------|-------|----------|
| 13.541  | 2.652  | 0.613 | 1.206    |
| 15.252  | 97.348 | 0.658 | 0.395    |



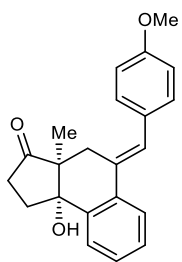

5b

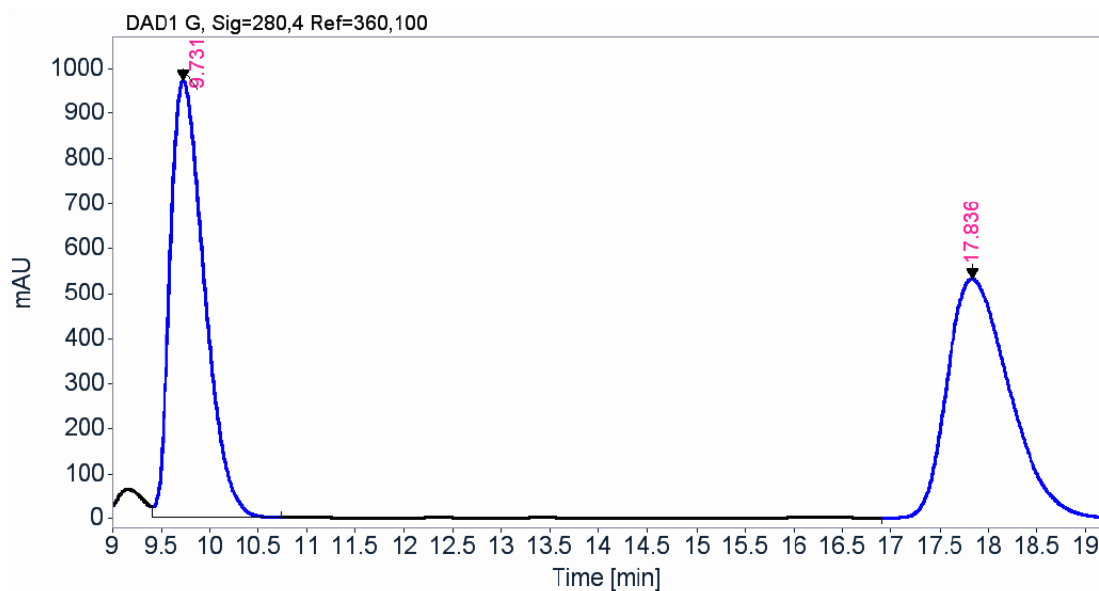

Signal: DAD1 G, Sig=280,4 Ref=360,100

| RT [min] | Type | Width [min] | Area      | Height   | Area% |
|----------|------|-------------|-----------|----------|-------|
| 9.731    | VB   | 0.3813      | 23577.910 | 970.8066 | 50.01 |
| 17.836   | BB   | 0.6946      | 23564.064 | 532.1541 | 49.99 |

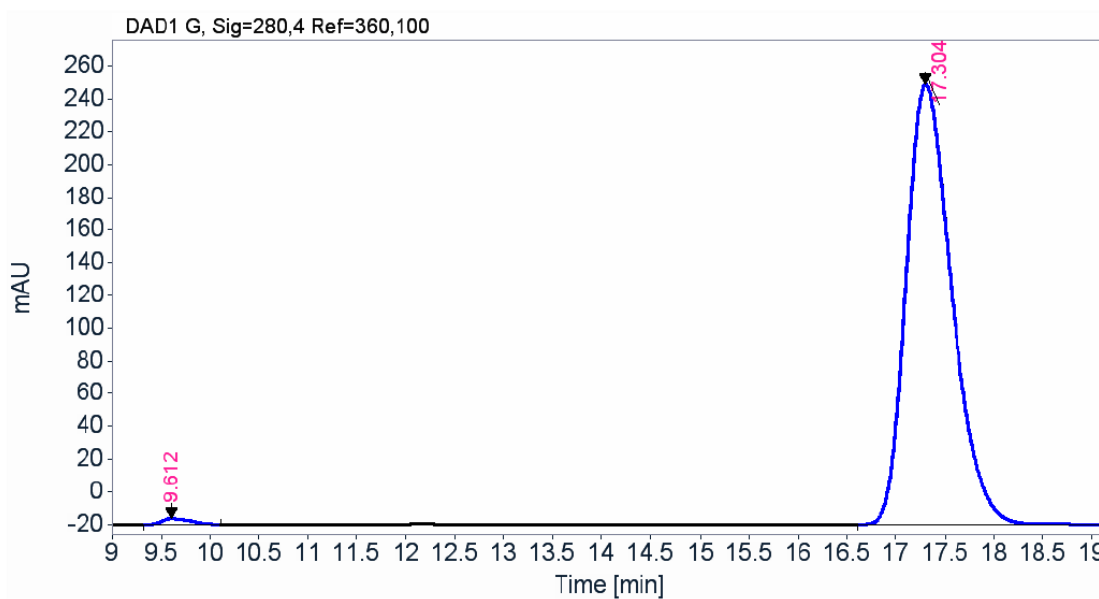

Signal: DAD1 G, Sig=280,4 Ref=360,100

| RT [min] | Type | Width [min] | Area     | Height   | Area% |
|----------|------|-------------|----------|----------|-------|
| 9.612    | BB   | 0.2873      | 75.552   | 3.6830   | 0.87  |
| 17.304   | BB   | 0.4934      | 8615.665 | 269.1923 | 99.13 |

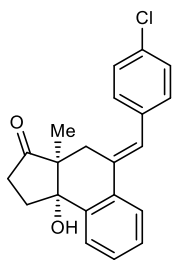

5c

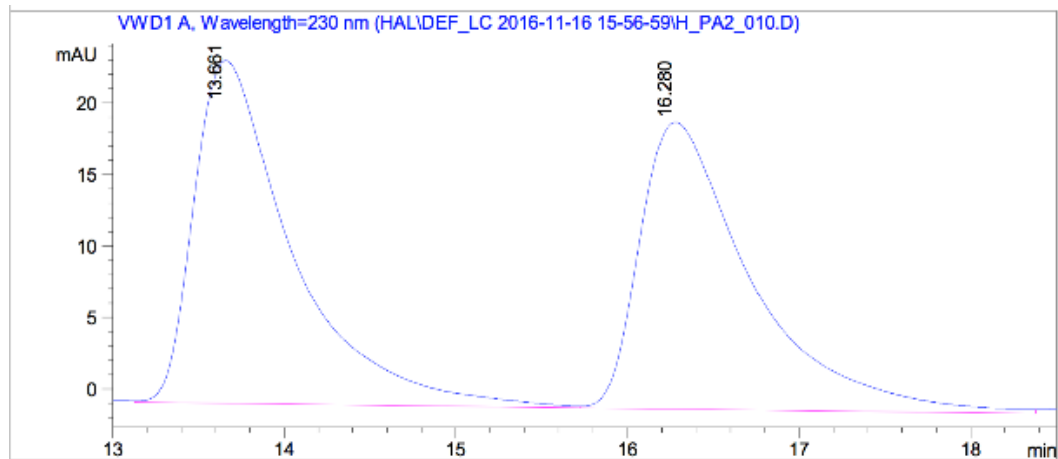

| Meas. R | Area % | Width | Symmetr. |
|---------|--------|-------|----------|
| 13.661  | 51.360 | 0.583 | 0.444    |
| 16.280  | 48.640 | 0.665 | 0.436    |

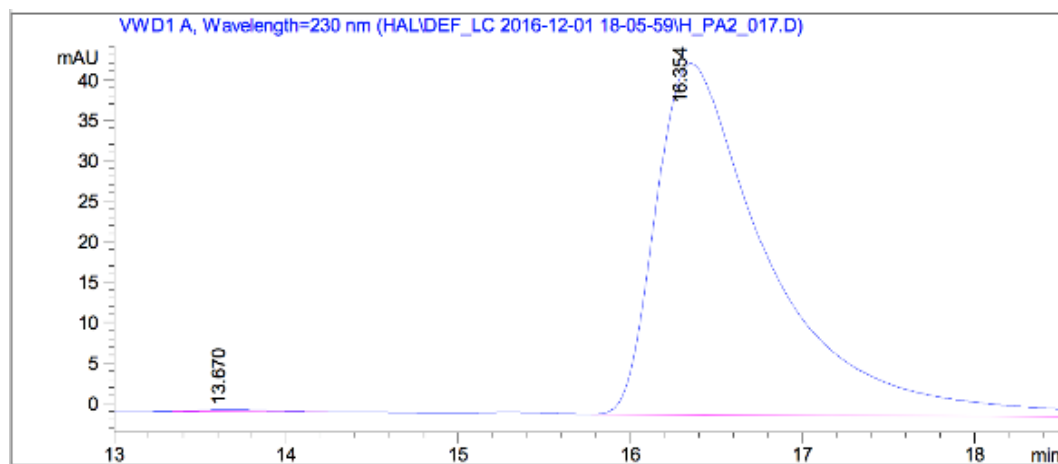

| Meas. R | Area % | Width | Symmetr. |
|---------|--------|-------|----------|
| 13.670  | 0.339  | 0.453 | 0.682    |
| 16.354  | 99.661 | 0.676 | 0.397    |

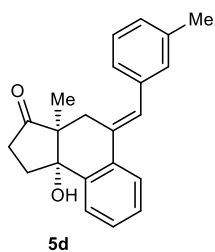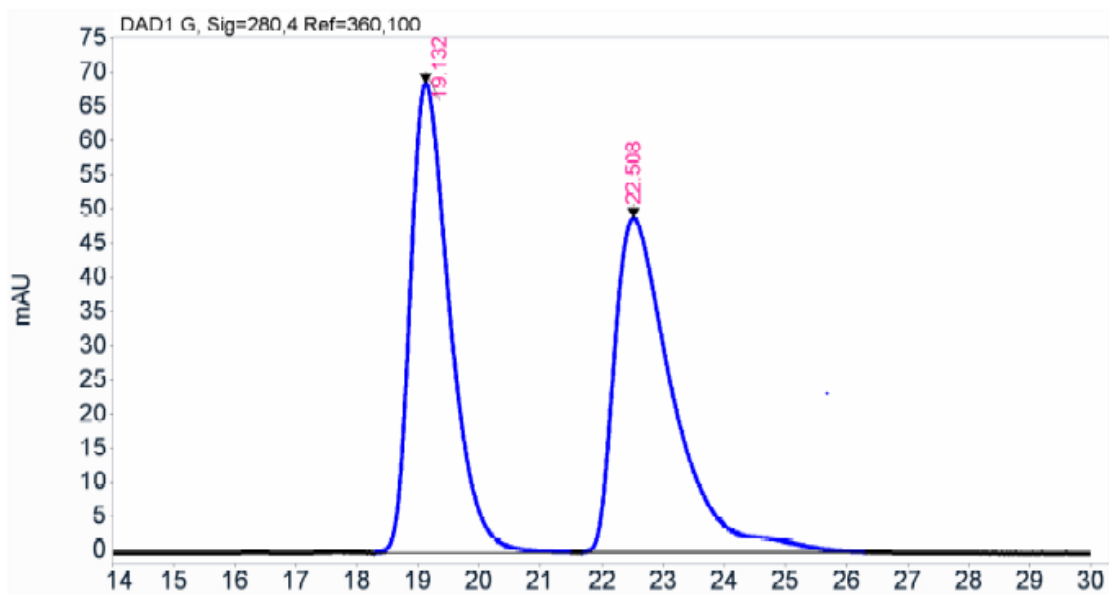

Signal: DAD1 G, Sig=280,4 Ref=360,100

| RT [min] | Type | Width [min] | Area     | Height  | Area% |
|----------|------|-------------|----------|---------|-------|
| 19.132   | BB   | 0.6743      | 3064.483 | 68.7132 | 48.68 |
| 22.508   | BB   | 0.9595      | 3231.097 | 48.8625 | 51.32 |

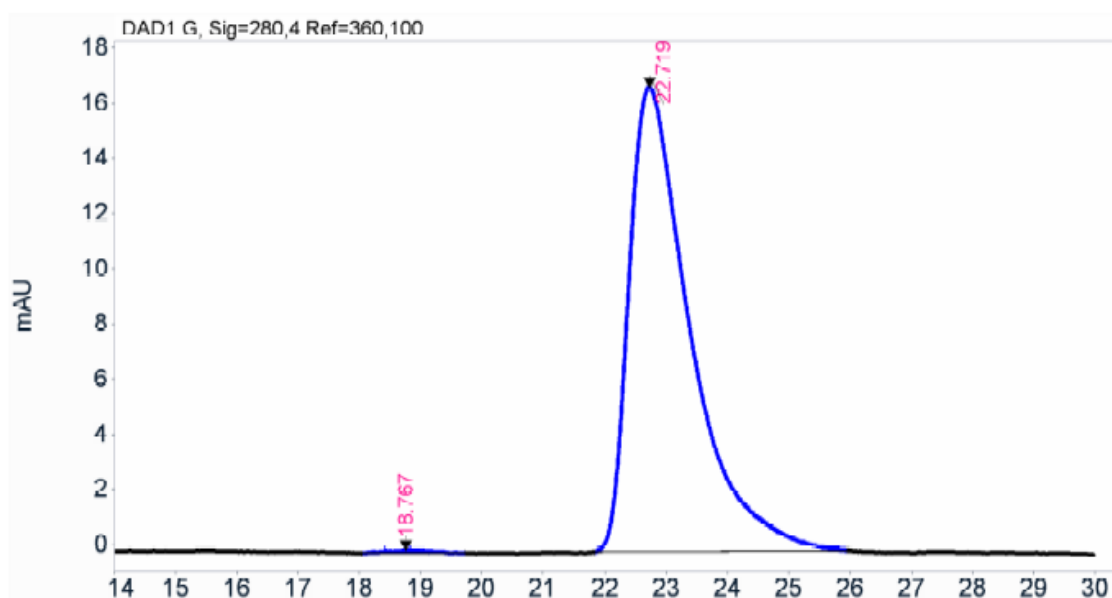

Signal: DAD1 G, Sig=280,4 Ref=360,100

| RT [min] | Type | Width [min] | Area     | Height  | Area% |
|----------|------|-------------|----------|---------|-------|
| 18.767   | MM   | 0.9379      | 5.455    | 0.0969  | 0.47  |
| 22.719   | BB   | 0.9691      | 1164.515 | 16.8323 | 99.53 |

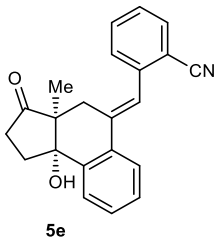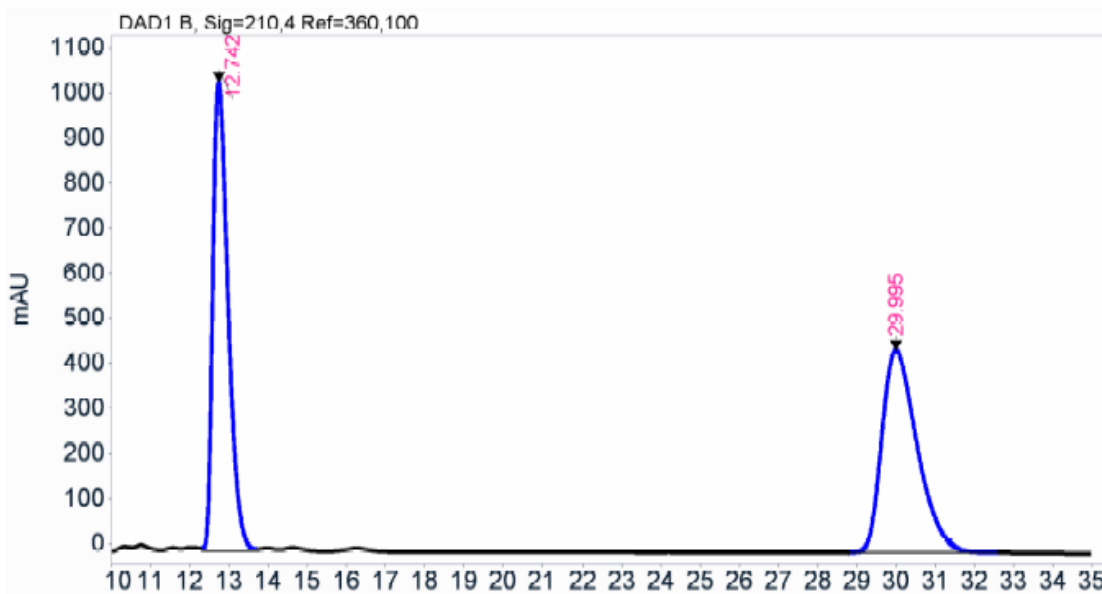

Signal: DAD1 B, Sig=210,4 Ref=360,100

| RT [min] | Type | Width [min] | Area      | Height    | Area% |
|----------|------|-------------|-----------|-----------|-------|
| 12.742   | VV   | 0.4196      | 28137.887 | 1040.1501 | 50.00 |
| 29.995   | BB   | 0.9488      | 28134.932 | 449.1726  | 50.00 |

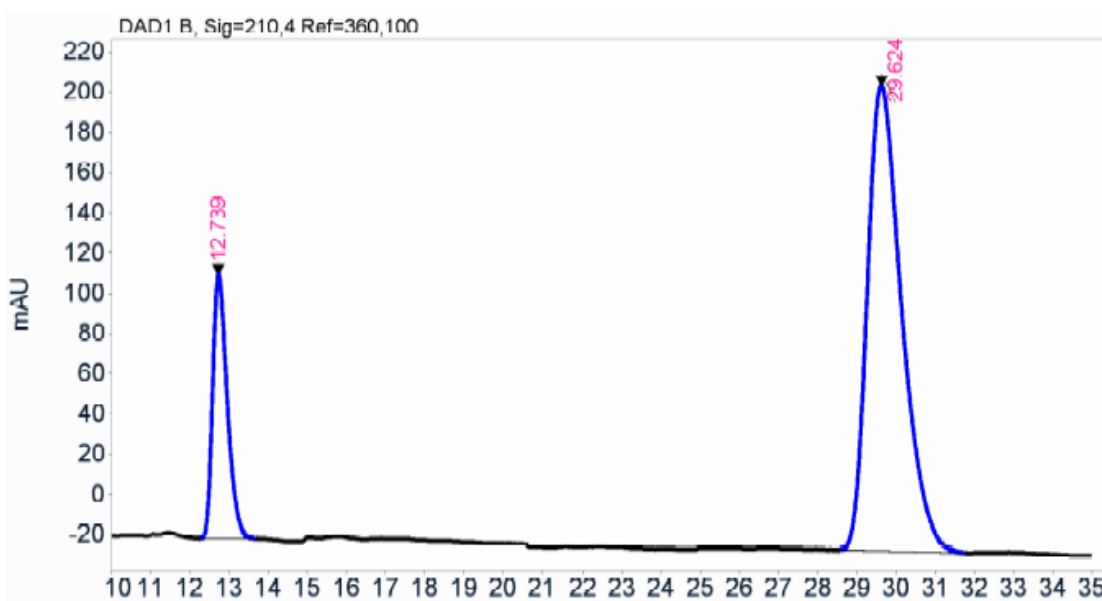

Signal: DAD1 B, Sig=210,4 Ref=360,100

| RT [min] | Type | Width [min] | Area      | Height   | Area% |
|----------|------|-------------|-----------|----------|-------|
| 12.739   | BB   | 0.3933      | 3382.737  | 130.9917 | 19.35 |
| 29.624   | BB   | 0.8870      | 14094.945 | 231.2712 | 80.65 |

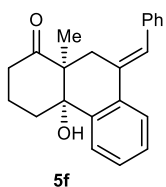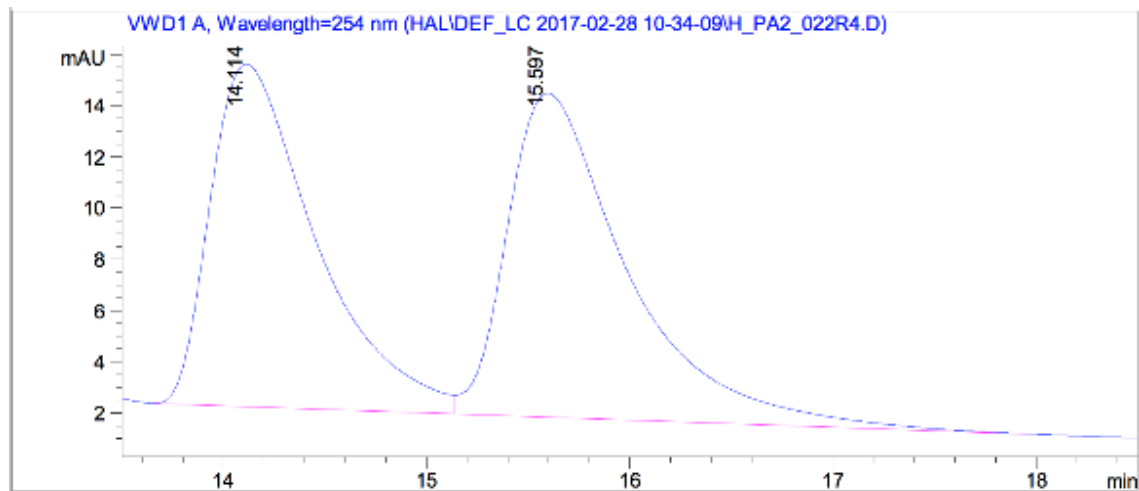

| Meas. R | Area % | Width | Symmetr. |
|---------|--------|-------|----------|
| 14.114  | 48.063 | 0.545 | 0.487    |
| 15.597  | 51.937 | 0.609 | 0.476    |

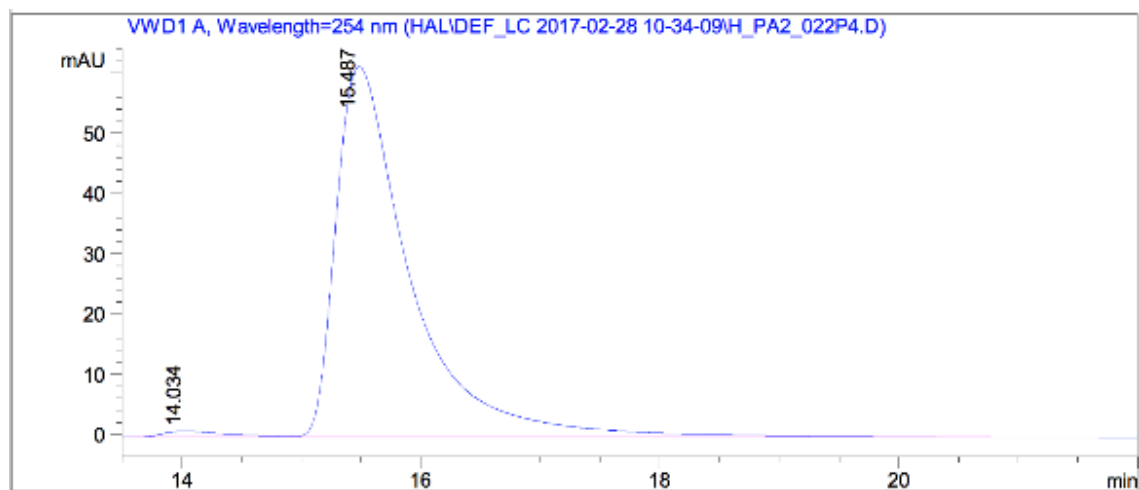

| Meas. R | Area % | Width | Symmetr. |
|---------|--------|-------|----------|
| 14.034  | 1.424  | 0.547 | 0.468    |
| 15.487  | 98.576 | 0.638 | 0.406    |

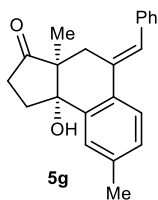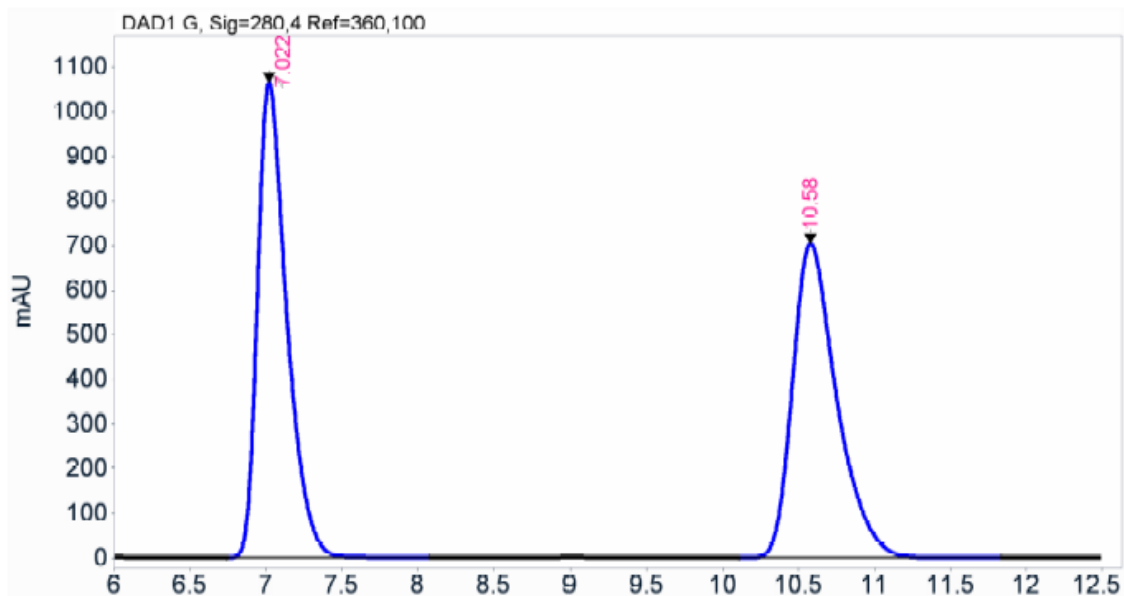

Signal: DAD1 G, Sig=280,4 Ref=360,100

| RT [min] | Type | Width [min] | Area      | Height    | Area% |
|----------|------|-------------|-----------|-----------|-------|
| 7.022    | BB   | 0.2000      | 14240.782 | 1064.7043 | 50.01 |
| 10.580   | BB   | 0.3037      | 14234.305 | 704.5869  | 49.99 |

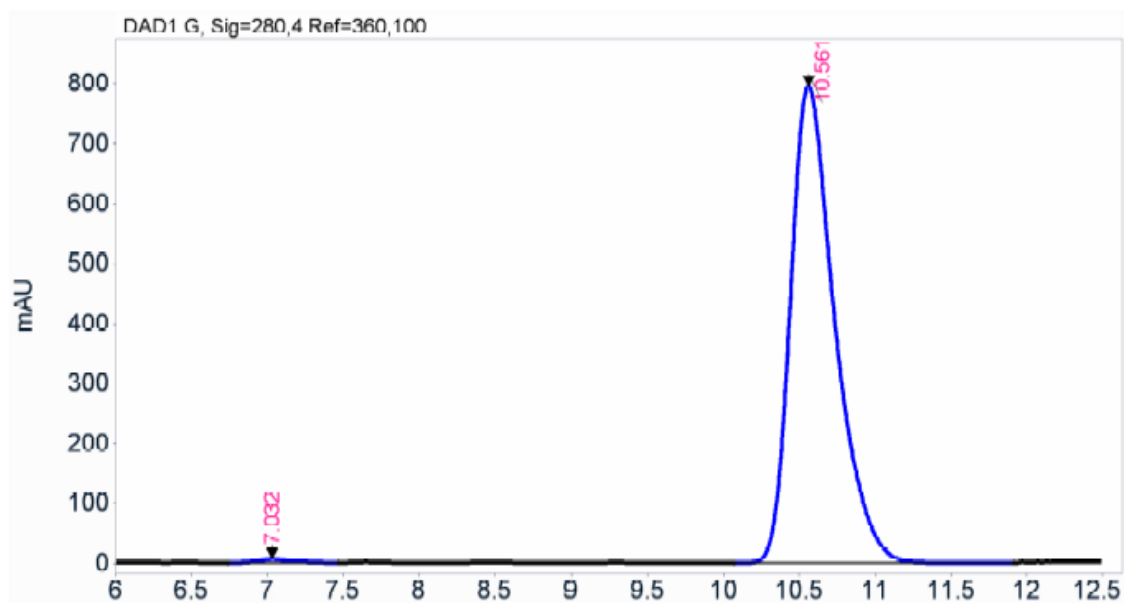

Signal: DAD1 G, Sig=280,4 Ref=360,100

| RT [min] | Type | Width [min] | Area      | Height   | Area% |
|----------|------|-------------|-----------|----------|-------|
| 7.032    | BB   | 0.2154      | 97.077    | 6.5322   | 0.60  |
| 10.561   | BB   | 0.3039      | 16085.202 | 795.5165 | 99.40 |

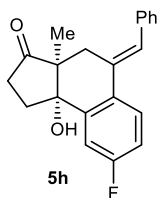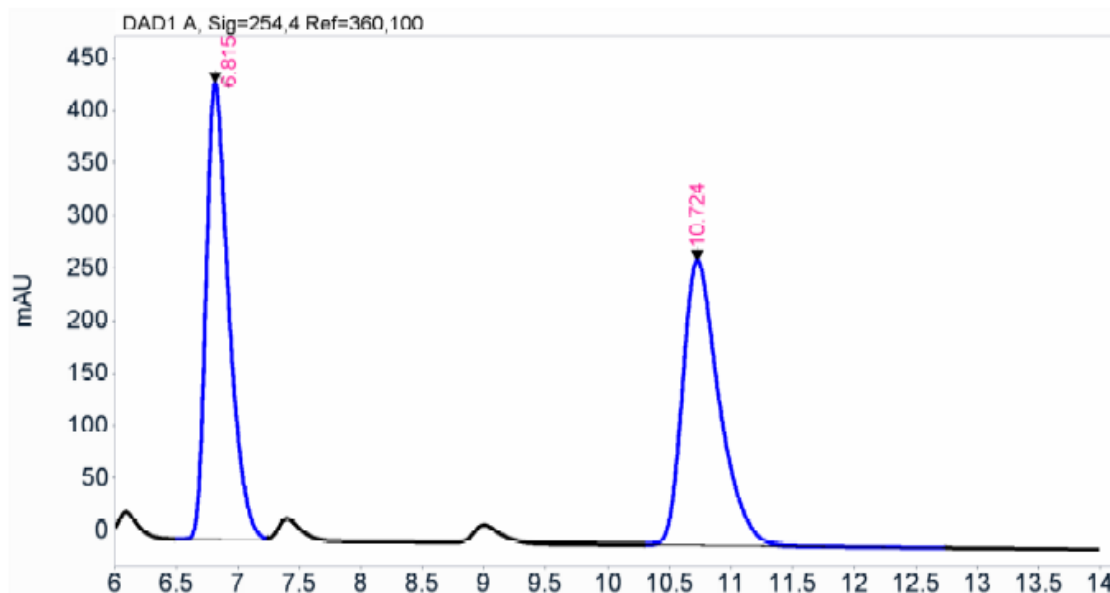

Signal: DAD1 A, Sig=254,4 Ref=360,100

| RT [min] | Type | Width [min] | Area     | Height   | Area% |
|----------|------|-------------|----------|----------|-------|
| 6.815    | BV   | 0.1911      | 5552.653 | 434.4767 | 49.90 |
| 10.724   | BBA  | 0.3103      | 5574.548 | 270.6377 | 50.10 |

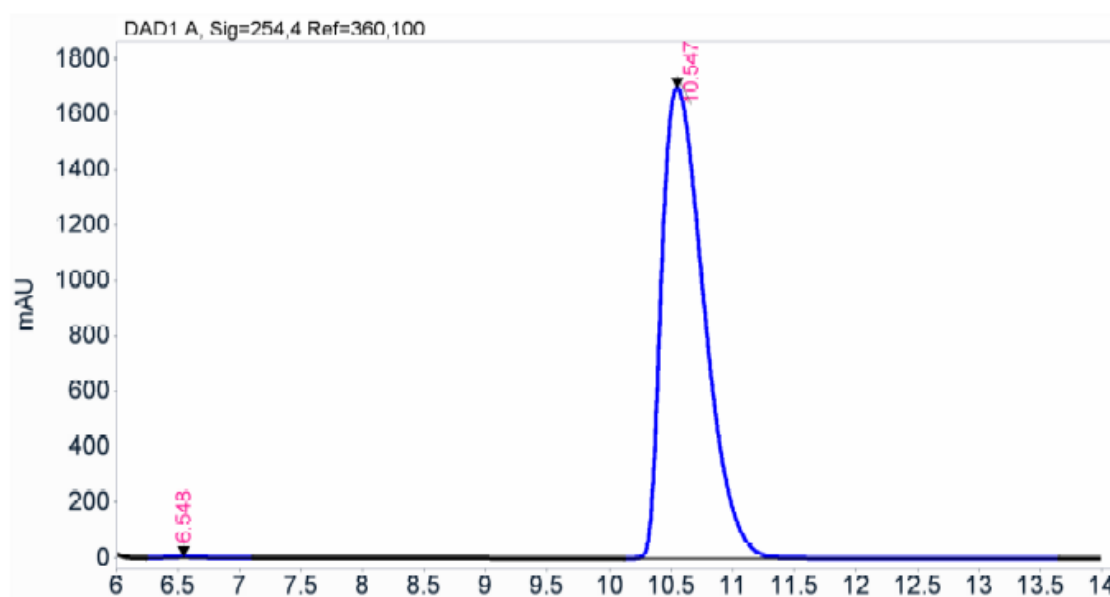

Signal: DAD1 A, Sig=254,4 Ref=360,100

| RT [min] | Type | Width [min] | Area      | Height    | Area% |
|----------|------|-------------|-----------|-----------|-------|
| 6.548    | BB   | 0.2179      | 55.128    | 3.5760    | 0.14  |
| 10.547   | BB   | 0.3760      | 40437.633 | 1696.7682 | 99.86 |

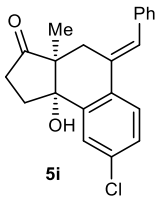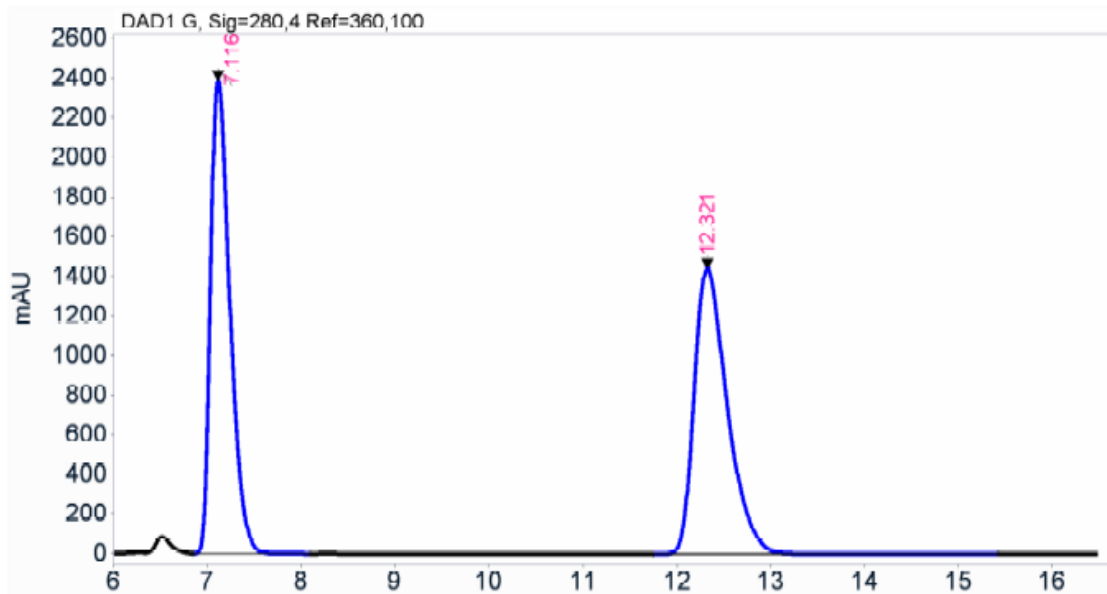

Signal: DAD1 G, Sig=280,4 Ref=360,100

| RT [min] | Type | Width [min] | Area      | Height    | Area% |
|----------|------|-------------|-----------|-----------|-------|
| 7.116    | VB   | 0.2195      | 34297.738 | 2388.9548 | 49.19 |
| 12.321   | BB   | 0.3750      | 35427.527 | 1440.2213 | 50.81 |

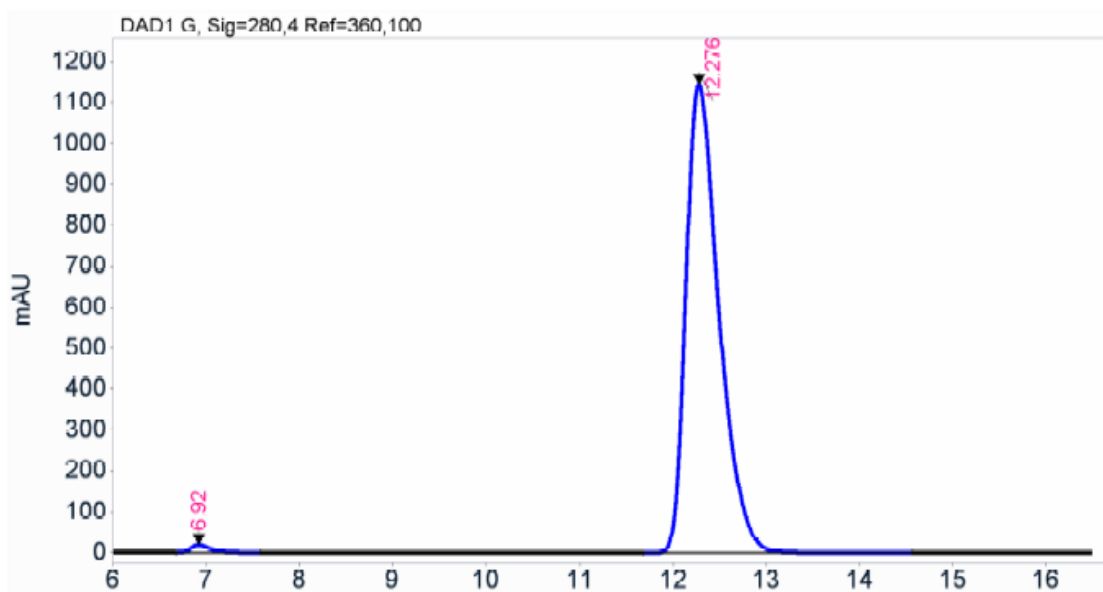

Signal: DAD1 G, Sig=280,4 Ref=360,100

| RT [min] | Type | Width [min] | Area      | Height    | Area% |
|----------|------|-------------|-----------|-----------|-------|
| 6.920    | BB   | 0.2038      | 261.525   | 19.0904   | 0.92  |
| 12.276   | BB   | 0.3744      | 28118.533 | 1145.3540 | 99.08 |



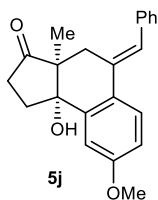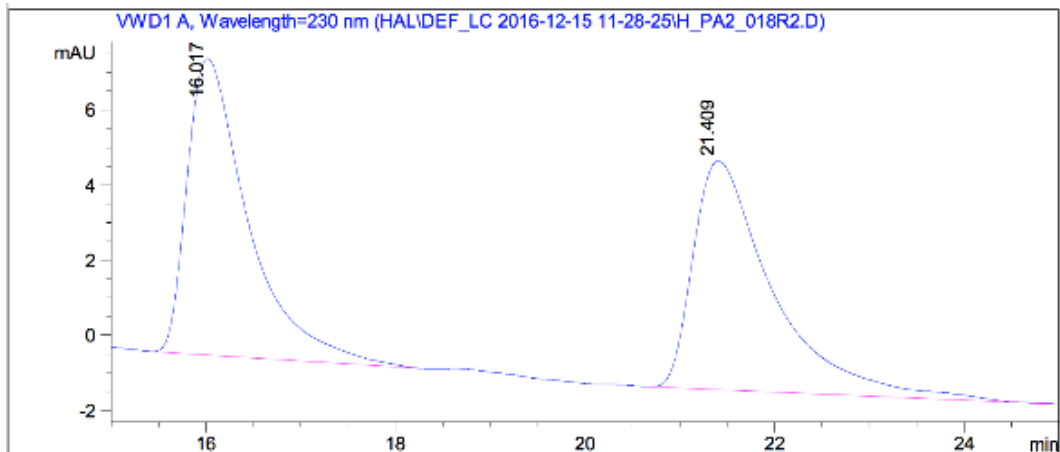

| Meas. R | Area % | Width | Symmetr. |
|---------|--------|-------|----------|
| 16.017  | 49.886 | 0.667 | 0.463    |
| 21.409  | 50.114 | 0.848 | 0.429    |

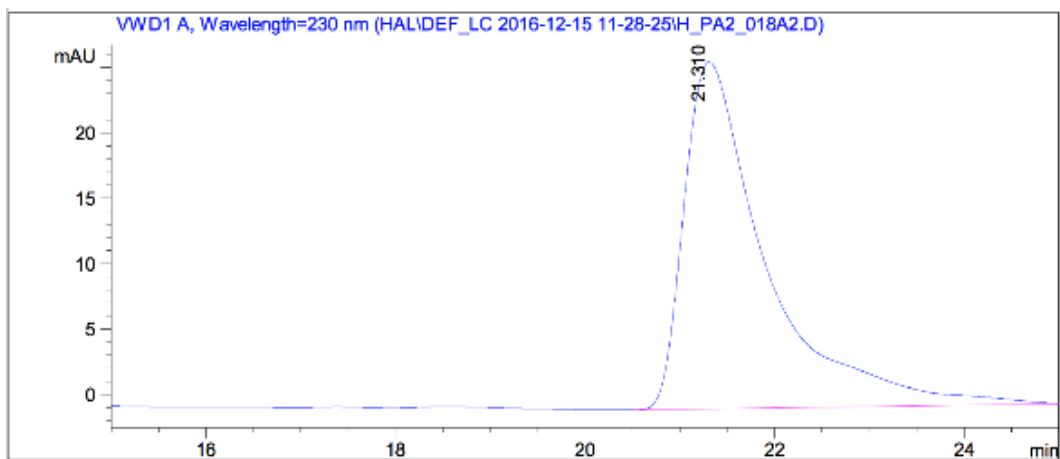

| Meas. R | Area % | Width | Symmetr. |
|---------|--------|-------|----------|
| 7.182   | 0.868  | 0.307 | 0.612    |
| 21.310  | 99.132 | 0.872 | 0.399    |

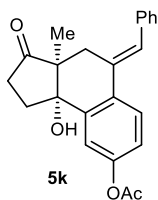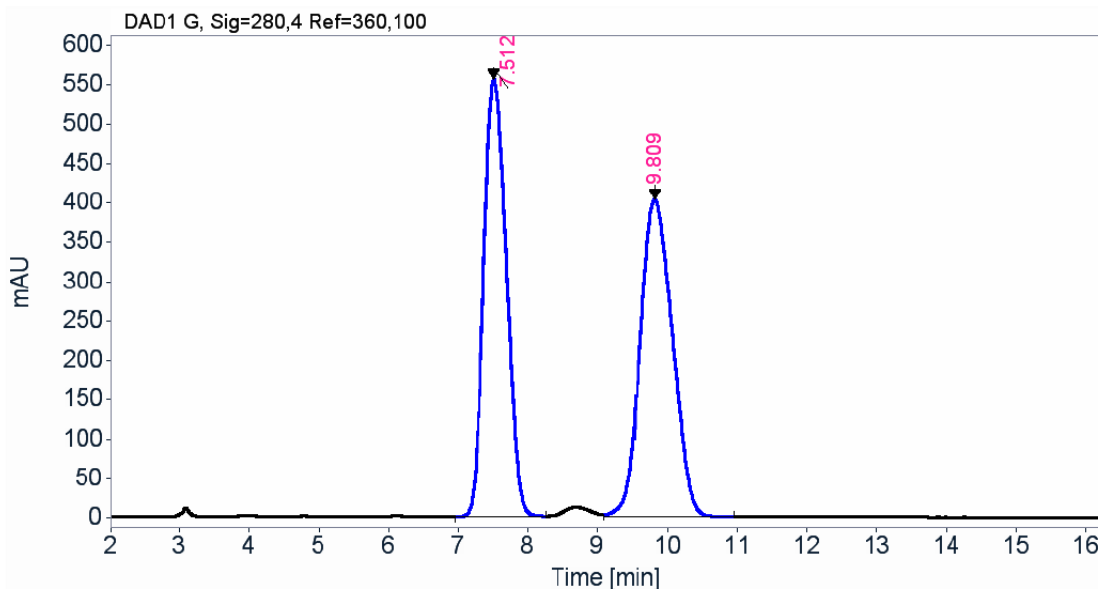

Signal: DAD1 G, Sig=280,4 Ref=360,100

| RT [min] | Type | Width [min] | Area      | Height   | Area% |
|----------|------|-------------|-----------|----------|-------|
| 7.512    | BB   | 0.3651      | 12532.396 | 555.7339 | 49.48 |
| 9.809    | VB   | 0.5133      | 12796.297 | 402.0919 | 50.52 |

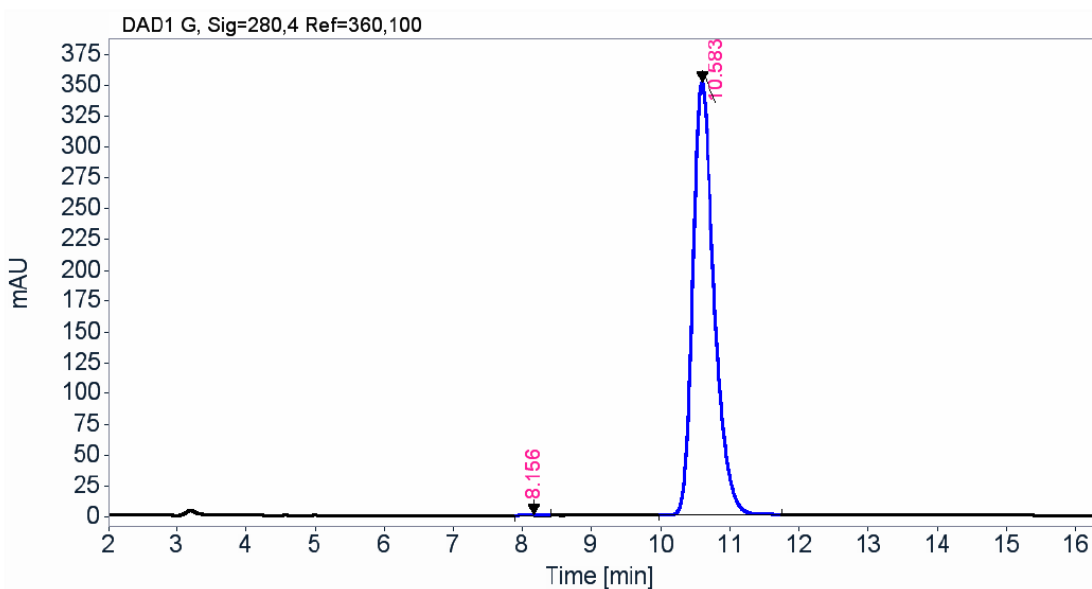

Signal: DAD1 G, Sig=280,4 Ref=360,100

| RT [min] | Type | Width [min] | Area     | Height   | Area% |
|----------|------|-------------|----------|----------|-------|
| 8.156    | MM   | 0.4294      | 43.995   | 1.7076   | 0.57  |
| 10.583   | BB   | 0.3290      | 7608.078 | 350.8091 | 99.43 |

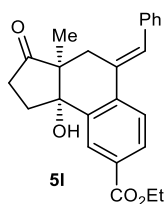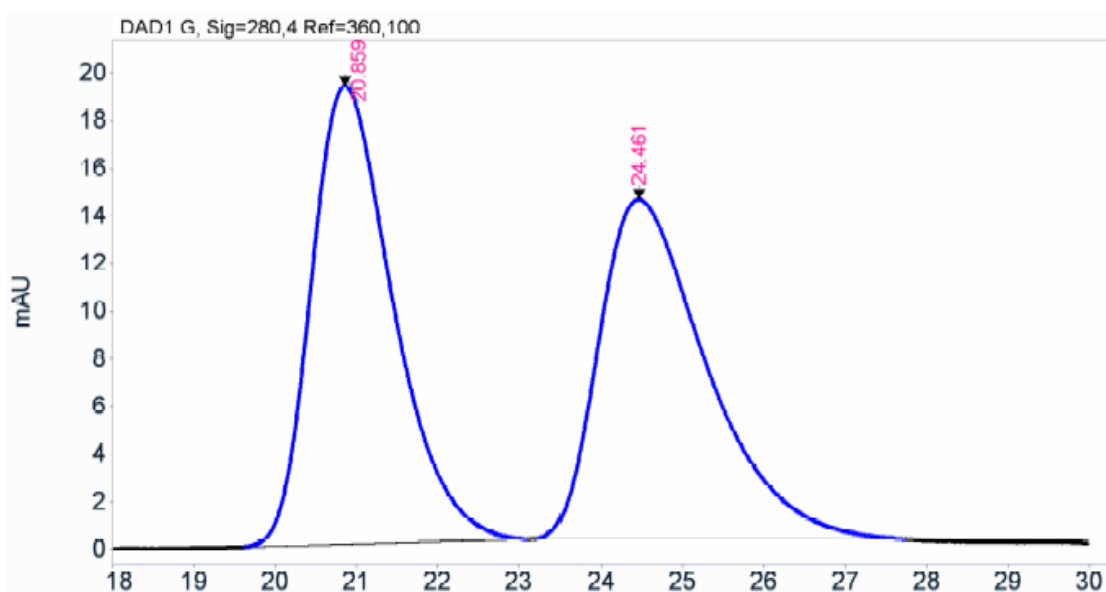

Signal: DAD1 G, Sig=280,4 Ref=360,100

| RT [min] | Type | Width [min] | Area     | Height  | Area% |
|----------|------|-------------|----------|---------|-------|
| 20.859   | BB   | 1.0235      | 1348.112 | 19.2382 | 50.68 |
| 24.461   | BB   | 1.1473      | 1311.834 | 14.2591 | 49.32 |

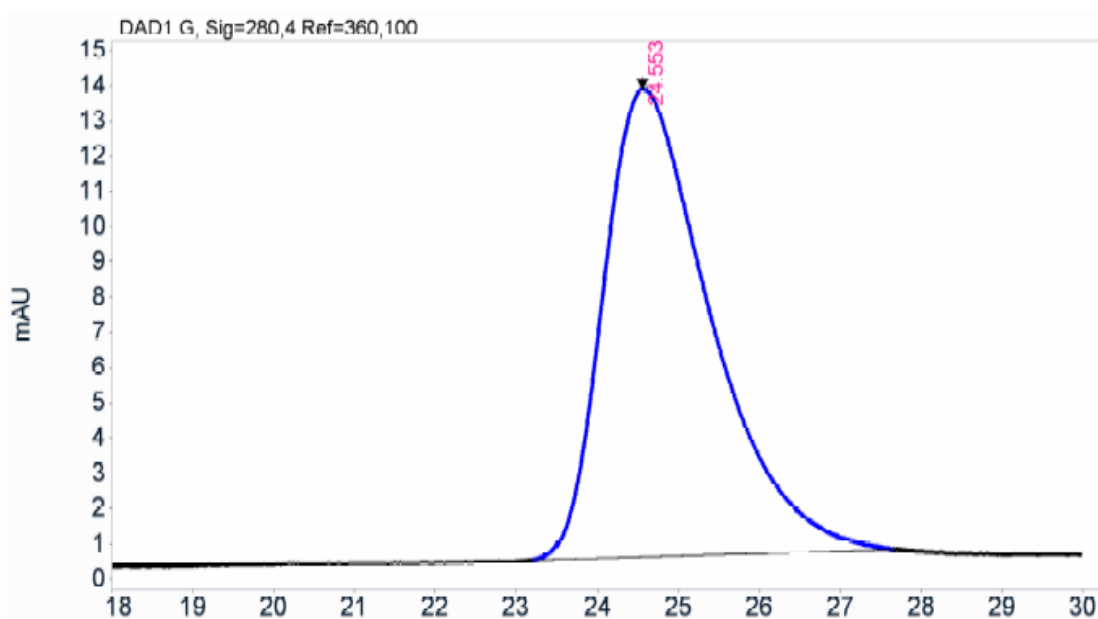

Signal: DAD1 G, Sig=280,4 Ref=360,100

| RT [min] | Type | Width [min] | Area     | Height  | Area%  |
|----------|------|-------------|----------|---------|--------|
| 24.553   | BB   | 1.1090      | 1218.466 | 13.2733 | 100.00 |

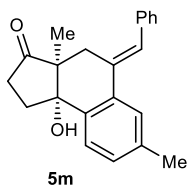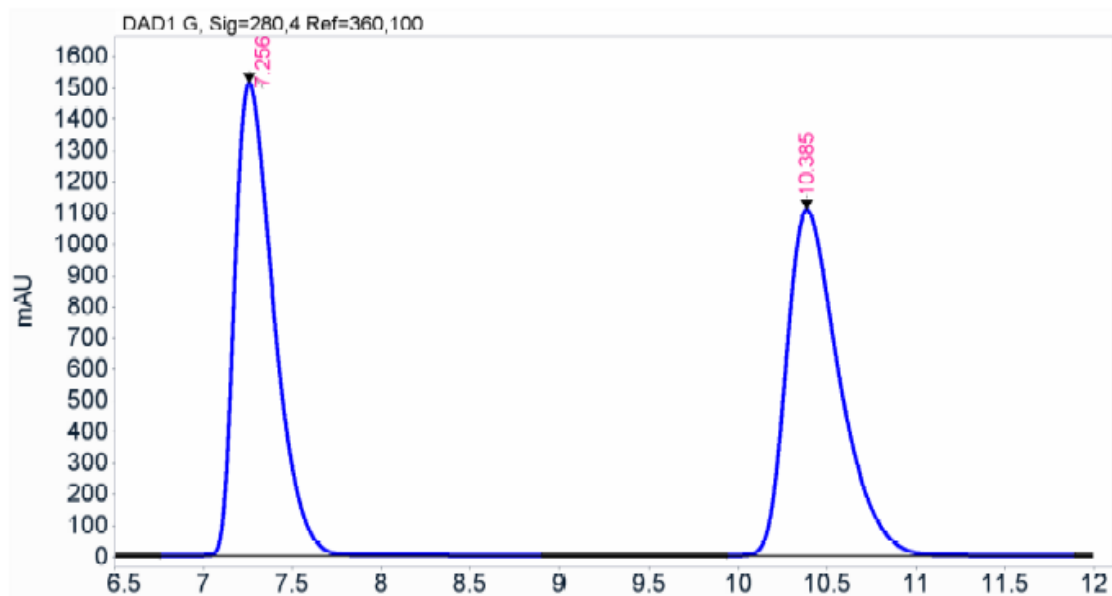

Signal: DAD1 G, Sig=280,4 Ref=360,100

| RT [min] | Type | Width [min] | Area      | Height    | Area% |
|----------|------|-------------|-----------|-----------|-------|
| 7.256    | BB   | 0.2338      | 22785.963 | 1512.0844 | 49.98 |
| 10.385   | BB   | 0.3145      | 22801.002 | 1106.3059 | 50.02 |

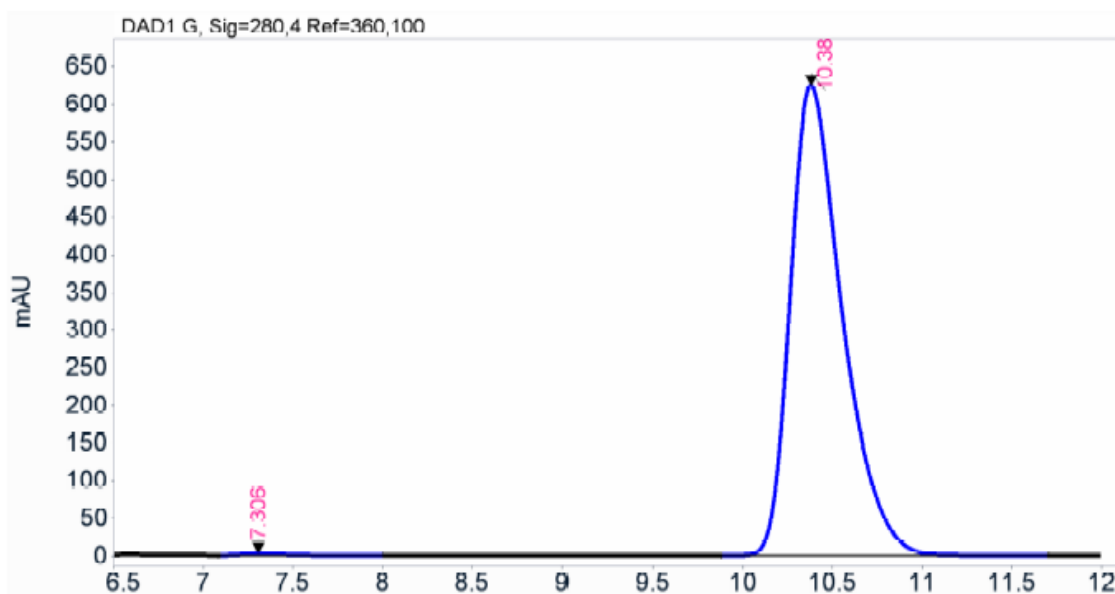

Signal: DAD1 G, Sig=280,4 Ref=360,100

| RT [min] | Type | Width [min] | Area      | Height   | Area% |
|----------|------|-------------|-----------|----------|-------|
| 7.306    | BB   | 0.2051      | 36.582    | 2.6831   | 0.29  |
| 10.380   | BB   | 0.3049      | 12578.919 | 624.8822 | 99.71 |

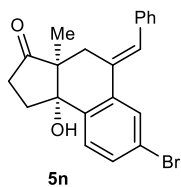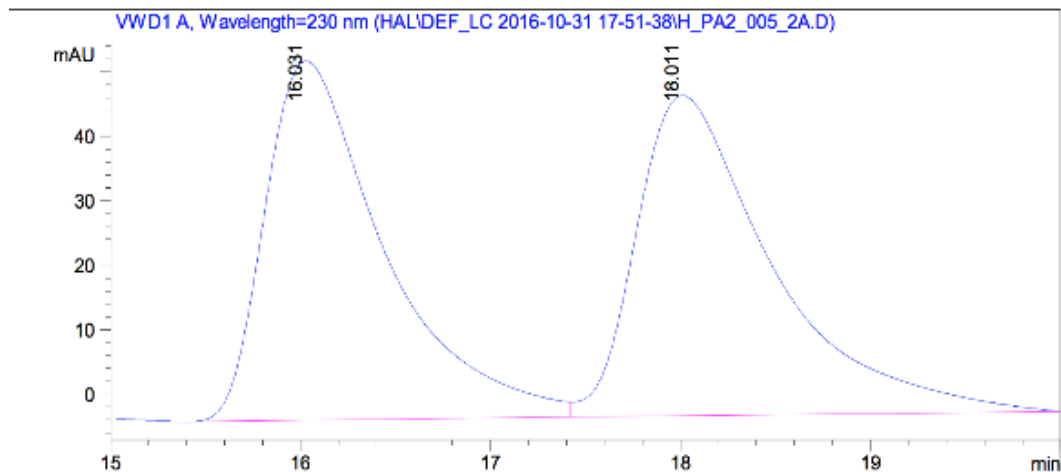

| Meas. R | Area % | Width | Symmetr. |
|---------|--------|-------|----------|
| 16.031  | 49.628 | 0.645 | 0.491    |
| 18.011  | 50.372 | 0.732 | 0.482    |

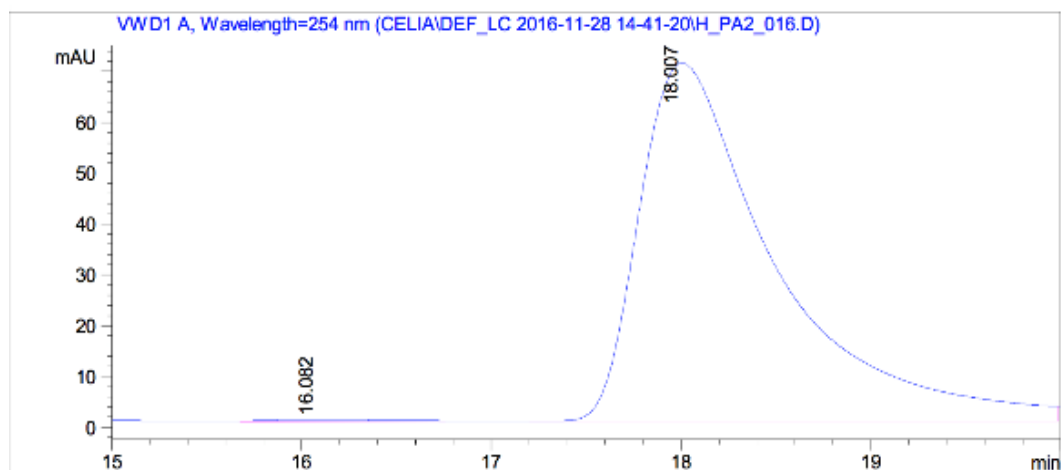

| Meas. R | Area % | Width | Symmetr. |
|---------|--------|-------|----------|
| 16.082  | 0.377  | 0.672 | 0.723    |
| 18.007  | 99.623 | 0.724 | 0.425    |

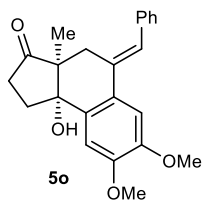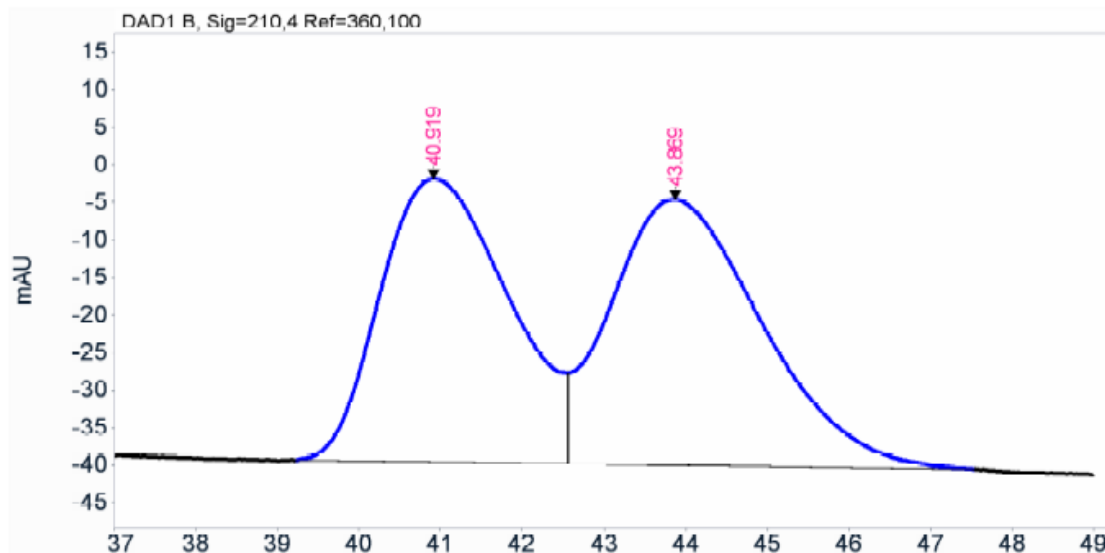

Signal: DAD1 B, Sig=210,4 Ref=360,100

| RT [min] | Type | Width [min] | Area     | Height  | Area% |
|----------|------|-------------|----------|---------|-------|
| 40.919   | BV   | 1.2876      | 4124.541 | 37.7838 | 47.39 |
| 43.869   | VB   | 1.5132      | 4578.141 | 35.4374 | 52.61 |

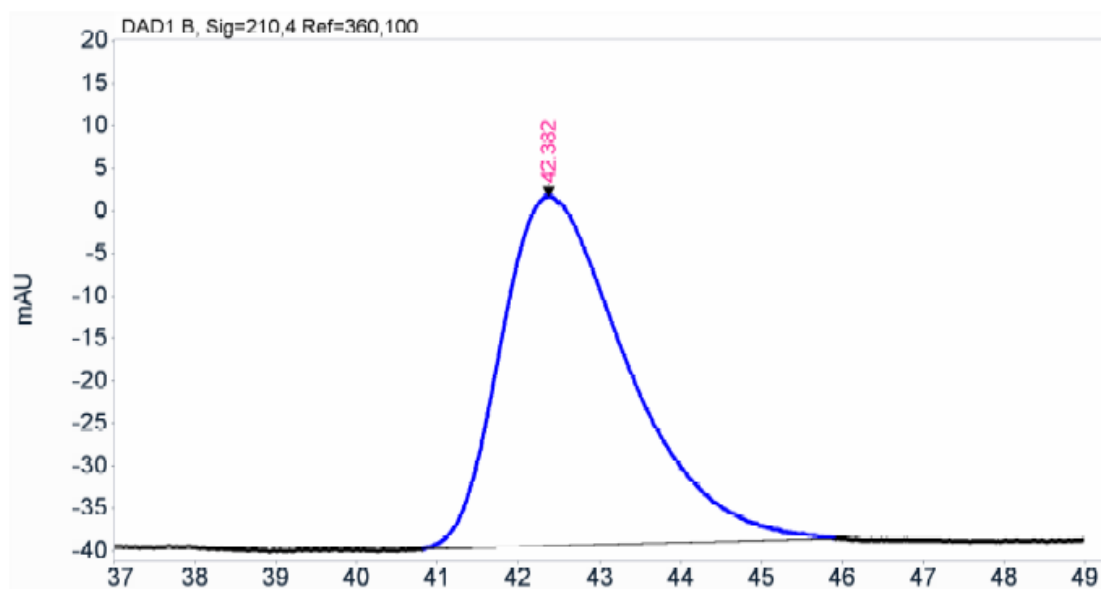

Signal: DAD1 B, Sig=210,4 Ref=360,100

| RT [min] | Type | Width [min] | Area     | Height  | Area%  |
|----------|------|-------------|----------|---------|--------|
| 42.382   | BB   | 1.2630      | 4419.429 | 41.0826 | 100.00 |

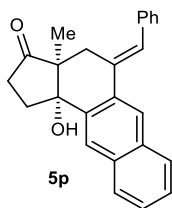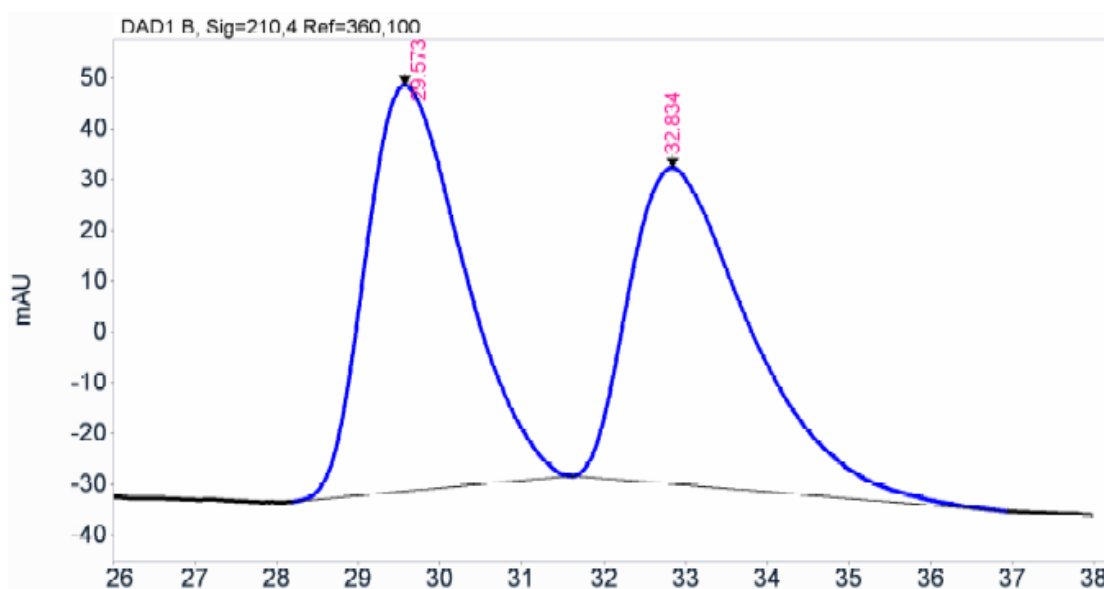

Signal: DAD1 B, Sig=210,4 Ref=360,100

| RT [min] | Type | Width [min] | Area     | Height  | Area% |
|----------|------|-------------|----------|---------|-------|
| 29.573   | BB   | 1.2102      | 6634.788 | 79.9463 | 50.75 |
| 32.834   | BB   | 1.2768      | 6439.603 | 62.2555 | 49.25 |

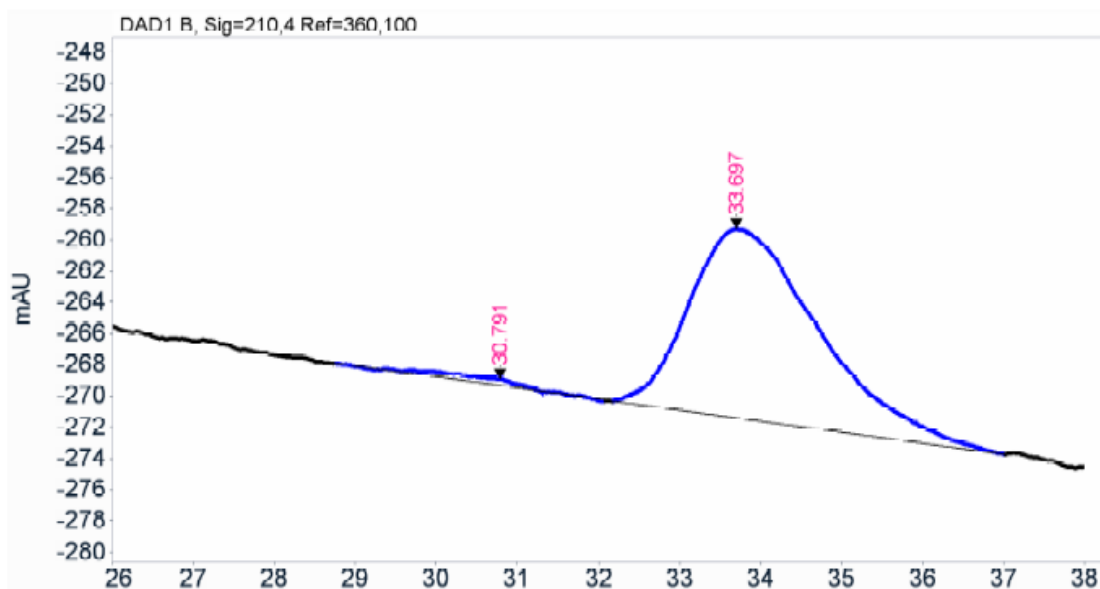

Signal: DAD1 B, Sig=210,4 Ref=360,100

| RT [min] | Type | Width [min] | Area     | Height  | Area% |
|----------|------|-------------|----------|---------|-------|
| 30.791   | MM   | 1.1531      | 29.371   | 0.4245  | 2.12  |
| 33.697   | BB   | 1.3145      | 1353.284 | 12.1217 | 97.88 |

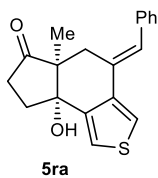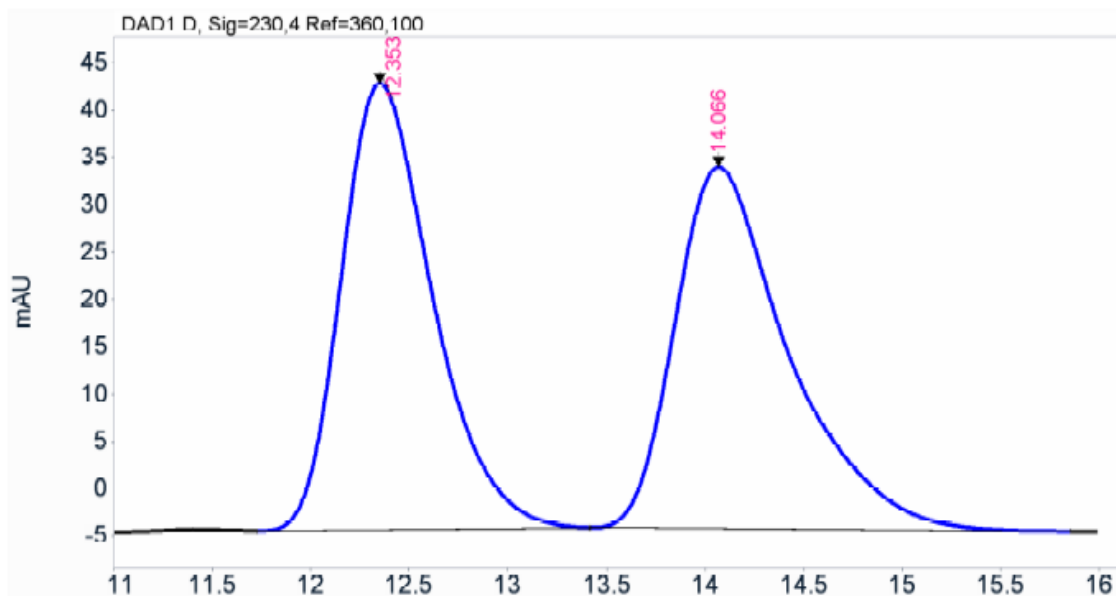

Signal: DAD1 D, Sig=230,4 Ref=360,100

| RT [min] | Type | Width [min] | Area     | Height  | Area% |
|----------|------|-------------|----------|---------|-------|
| 12.353   | BB   | 0.4920      | 1520.132 | 47.1697 | 49.84 |
| 14.066   | BB   | 0.5873      | 1530.195 | 38.2051 | 50.16 |

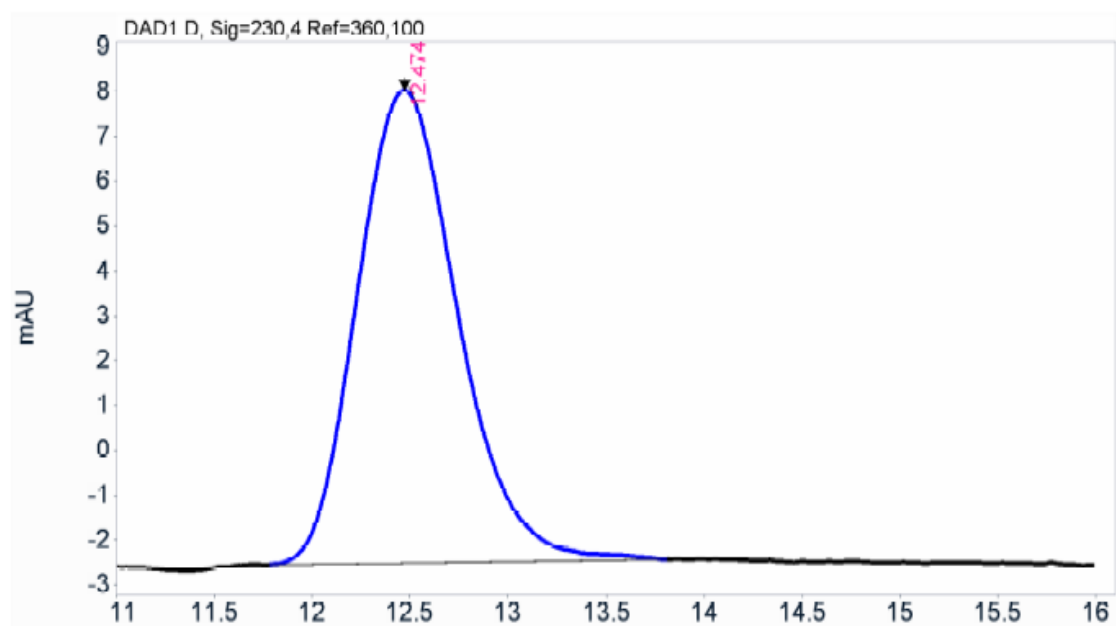

Signal: DAD1 D, Sig=230,4 Ref=360,100

| RT [min] | Type | Width [min] | Area    | Height  | Area%  |
|----------|------|-------------|---------|---------|--------|
| 12.474   | BB   | 0.5566      | 376.502 | 10.5426 | 100.00 |



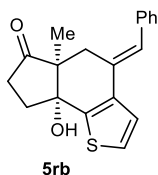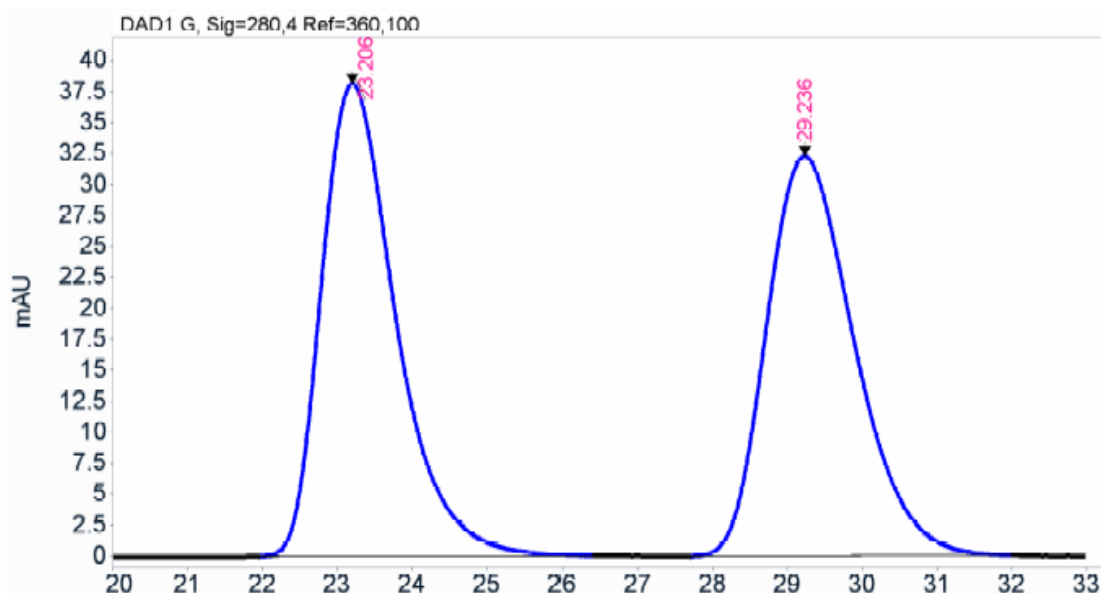

Signal: DAD1 G, Sig=280,4 Ref=360,100

| RT [min] | Type | Width [min] | Area     | Height  | Area% |
|----------|------|-------------|----------|---------|-------|
| 23.206   | BB   | 1.0229      | 2632.945 | 38.1632 | 50.03 |
| 29.236   | BB   | 1.2222      | 2629.708 | 32.2889 | 49.97 |

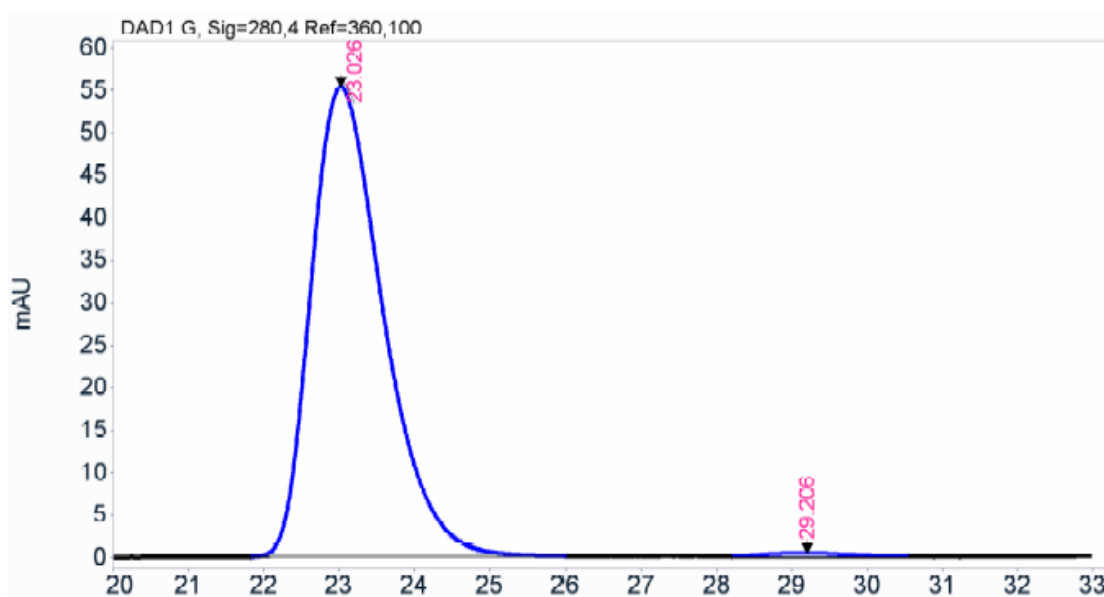

Signal: DAD1 G, Sig=280,4 Ref=360,100

| RT [min] | Type | Width [min] | Area     | Height  | Area% |
|----------|------|-------------|----------|---------|-------|
| 23.026   | BB   | 1.0204      | 3679.825 | 55.2973 | 98.87 |
| 29.206   | MM   | 1.4456      | 42.053   | 0.4848  | 1.13  |

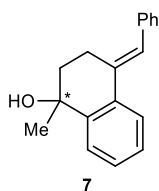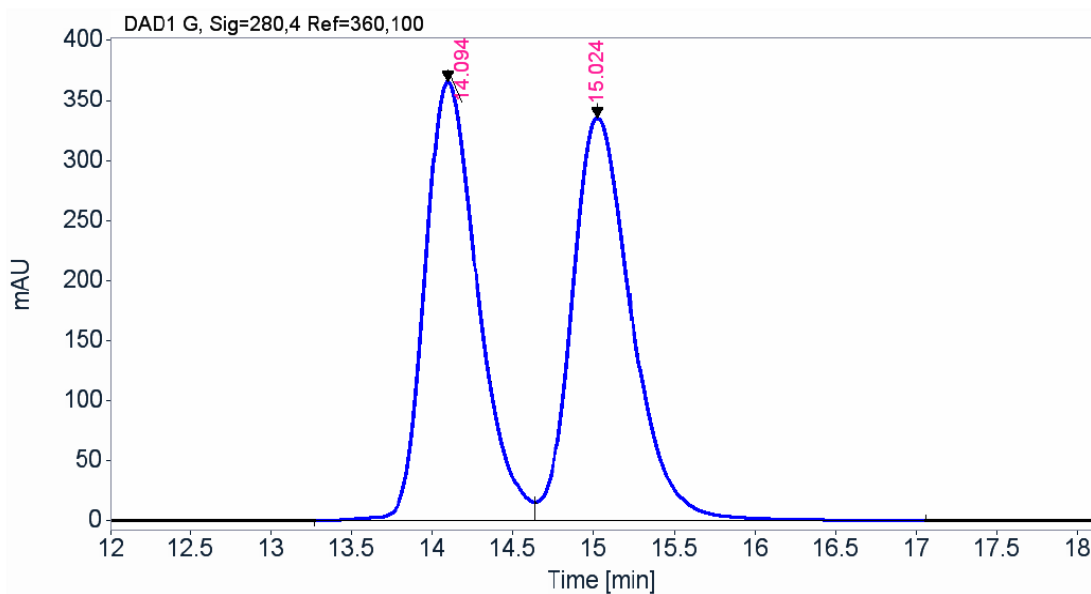

Signal: DAD1 G, Sig=280,4 Ref=360,100

| RT [min] | Type | Width [min] | Area     | Height   | Area% |
|----------|------|-------------|----------|----------|-------|
| 14.094   | BV   | 0.3462      | 8285.378 | 365.8550 | 49.48 |
| 15.024   | VB   | 0.3865      | 8459.277 | 335.0882 | 50.52 |

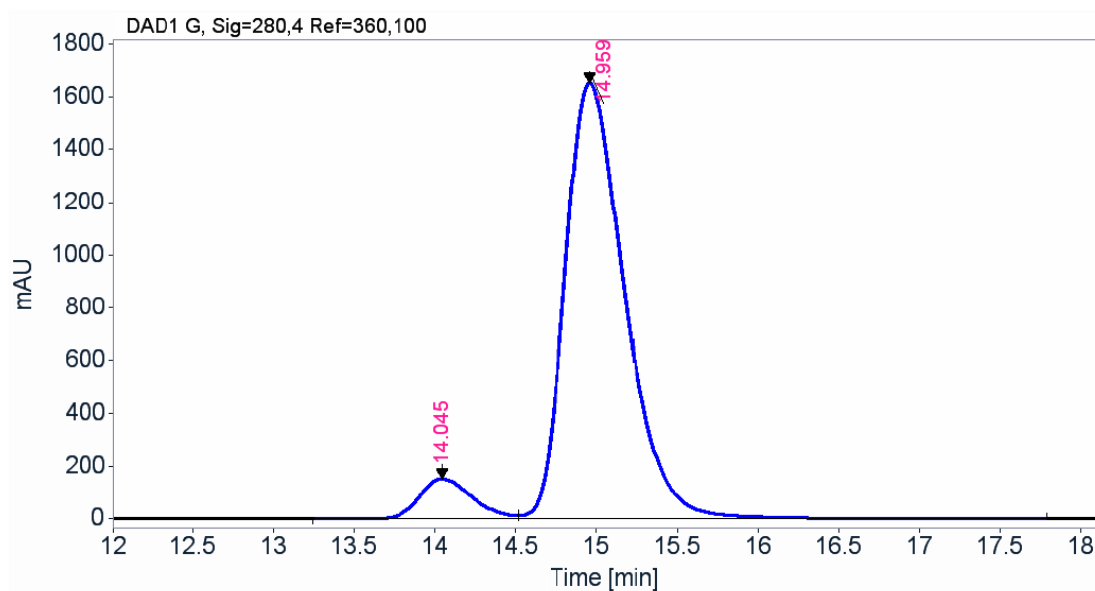

Signal: DAD1 G, Sig=280,4 Ref=360,100

| RT [min] | Type | Width [min] | Area      | Height    | Area% |
|----------|------|-------------|-----------|-----------|-------|
| 14.045   | BV   | 0.3458      | 3446.738  | 152.4387  | 7.59  |
| 14.959   | VB   | 0.3901      | 41937.324 | 1652.3798 | 92.41 |

**References**

1. B. M. Partridge, J. Solana González, H. W. Lam, *Angew. Chem., Int. Ed.* **2014**, *53*, 6523-6527.
2. S. Kallepu, K. K. Gollapelli, J. B. Nanubolu, R. Chegondi, *Chem. Commun.* **2015**, *51*, 16840-16843.
3. Prepared according to: A. I. Oliva, U. Christmann, D. Font, F. Cuevas, P. Ballester, H. Buschmann, A. Torrens, S. Yenes, M. A. Pericàs, *Org. Lett.* **2008**, *10*, 1617-1619.
4. M. Kenny, J. Christensen, S. J. Coles, V. Franckevičius, *Org. Lett.* **2015**, *17*, 3926-3929.
5. Prepared according to: I. Misztalewska, A. Z. Wilczewska, O. Wojtasik, K. H. Markiewicz, P. Kuchlewski, A. M. Majcher, *RSC Adv.* **2015**, *5*, 100281-100289.
6. Prepared according to: A. K. Ghosh, D. D. Anderson, *Org. Lett.* **2012**, *14*, 4730-4733.
7. Prepared according to: D. Kalaitzakis, J. D. Rozzell, S. Kambourakis, I. Smonou, *Eur. J. Org. Chem.* **2006**, 2309-2313.
8. Prepared according to: Z. He, H. Li, Z. Li, *J. Org. Chem.* **2010**, *75*, 4636-4639.
9. Prepared according to: C. Görl, H. G. Alt, *J. Organomet. Chem.* **2007**, *692*, 5727-5753. However, propargyl bromide (80% wt. in toluene) was used in place of propargyl chloride.
10. J.-i. Ito, K. Fujii, H. Nishiyama, *Chem. Eur. J.* **2013**, *19*, 601-605.
11. J. Yan, N. Yoshikai, *ACS Catal.* **2016**, *6*, 3738-3742.
